# Supplementary material for: Plant Age and Soil Texture Rather Than the Presence of Root Hairs Cause Differences in Maize Resource Allocation and Root Gene Expression in the Field
Source: Plants (Basel). 2022 Oct 28;11(21):2883. doi: 10.3390/plants11212883 (PMC9657941; doi:10.3390/plants11212883)
Supplement: Supplementary file 1 [file plants-11-02883-s001.zip]

Archive with 6 entries (6 files):
- Supplementary Figures and Tables.pdf
- Table S3.xlsx
- Table S5.xlsx
- Table S6.xlsx
- Table S7.xlsx
- Table S8.xlsx
