# Supplementary material for: Plant Age and Soil Texture Rather Than the Presence of Root Hairs Cause Differences in Maize Resource Allocation and Root Gene Expression in the Field
Source: Plants (Basel). 2022 Oct 28;11(21):2883. doi: 10.3390/plants11212883 (PMC9657941; doi:10.3390/plants11212883)
Supplement: Supplementary file 1 [file plants-11-02883-s001.zip › Table S3.xlsx]

## Sheet: Sheet1
Plant age and soil texture rather than the presence of root hairs cause differences in maize resource allocation and root gene expression in the field
Plant and Soil
Minh Ganther, Eva Lippold, Manuela Désirée Bienert, Marie-Lara Bouffaud, Mario Bauer, Louis Baumann, Gerd Patrick Bienert, Doris Vetterlein, Anna Heintz-Buschart, Mika Tapio Tarkka*
*Corresponding Author: mika.tarkka@ufz.de (Helmholtz-Institute for Environmental Research - UFZ, Halle, Germany)
Supplementary File 5 (ESM5)
Supplementary Table 8: Gene expression (RNAseq) related to nutrient transport in dependence to stage, substrate and genotype.
Differential expression was determined by the DESeq package (Wald test). Only genes with corrected p-value padj<0.05 are included.
Sheet 'Transporter_GeneExpression' shows the P-values from the DESeq2 analyses. Values in red color represent up-regulated genes, values in blue color represent down-regulated genes.
Values with yellow background are significant at P<0.05
L: loam, S: sand

## Sheet: Gene_Expression
Plant age and soil texture rather than the presence of root hairs cause differences in maize resource allocation and root gene expression in the field
Plants
Minh Ganther, Eva Lippold, Manuela Désirée Bienert, Marie-Lara Bouffaud, Mario Bauer, Louis Baumann, Gerd Patrick Bienert, Doris Vetterlein, Anna Heintz-Buschart, Mika Tapio Tarkka*
*Corresponding Author: mika.tarkka@ufz.de (Helmholtz-Institute for Environmental Research - UFZ, Halle, Germany)
Table S3: Expression of mineral element transporters and aquaporins by stage, substrate, and genotype
Differential expression was determined by the DESeq package (Wald test).
LFC: log2 fold change
							Pairwise contrasts (C2 vs C1) describing the effect of Condition2 vs Condition1 (baseline)
	also surveyed by qPCR for soil depth impact		P<0.05 (LRT test)				P<0.05 (Wald test)			up-regulated	down-regulated		P<0.05 (Wald test)				P<0.05 (Wald test)
			general effect (group factor)				general effect (pairwise)						substrate effect by stage (pairwise)				genotype effect by stage by substrate (pairwise)						general effect (pairwise)						substrate effect by stage (pairwise)				genotype effect by stage by substrate (pairwise)
element	gene_id	label	stage	substrate	genotype		B19vB14	B59vB19	B59vB14	SvsL	rth3vsWT		B14_SvsL	B19_SvsL	B59_SvsL		B14_L_rth3vsWT	B14_S_rth3vsWT	B19_L_rth3vsWT	B19_S_rth3vsWT	B59_L_rth3vsWT	B59_S_rth3vsWT	B19vB14	B59vB19	B59vB14	SvsL	rth3vsWT		B14_SvsL	B19_SvsL	B59_SvsL		B14_L_rth3vsWT	B14_S_rth3vsWT	B19_L_rth3vsWT	B19_S_rth3vsWT	B59_L_rth3vsWT	B59_S_rth3vsWT
Ca	Zm00001d002022	CAX2	0.174632	0.680946	0.983426		0.127037	0.304532	0.811045	0.678803	0.974446		0.930495	0.92379	0.118502		0.686389	1	0.517624	1	1	0.930165	-0.237455	0.191567	-0.0458877	0.062926	0.0236937		-0.0597293	-0.0578045	0.345751		0.177341	-0.00053086	-0.151709	-0.115147	-0.129547	-0.0646988
Ca	Zm00001d023377	CAX11	0.0940552	0.120961	0.933972		0.980068	0.0961799	0.0462434	0.118118	0.900916		0.869835	0.908926	0.0360597		0.909771	1	0.48233	1	0.999564	0.743579	-0.00835271	-0.389301	-0.397654	-0.268012	0.0999788		-0.134706	-0.0938355	-0.628817		-0.125107	-0.134677	0.345268	0.361789	0.58502	0.434662
Ca	Zm00001d052856	Ca-ATPase2	0.859389	0.541102	0.982834		0.826859	0.675225	0.811947	0.538695	NA		NA	NA	NA		NA	1	NA	1	1	0.772666	-0.367998	0.718664	0.350666	0.686964	0.184088		1.23472	1.26644	-0.618301		0.752077	-0.397263	-1.69534	0.465987	2.83004	-2.7049
Ca	Zm00001d026253	Ca-ATPase5	0.129953	0.374456	0.931968		0.686777	0.383419	0.0957499	0.367568	0.897614		0.852743	0.424317	0.998862		0.85938	1	0.300454	1	1	0.928739	-0.223268	-0.476771	-0.700039	-0.343929	0.209739		-0.306215	-0.781073	0.00157747		-0.428222	-0.633456	1.12811	1.10669	0.439324	-0.331897
Ca	Zm00001d002396	Ca-ATPase9	0.688014	0.151373	1		0.890569	0.447431	0.471446	0.144992	0.998781		0.901307	0.991451	0.0130513		0.96367	1	0.169278	1	1	0.56976	0.0511141	-0.250636	-0.199522	-0.304004	-0.00295259		-0.129833	0.0119074	-0.857271		-0.073312	-0.416075	0.79293	-0.411311	0.144433	0.845631
Mg	Zm00001d000430	MGT1	0.0315275	0.163418	0.90351		0.0177099	0.23481	0.442983	0.161023	0.859765		0.405843	0.978778	0.390658		0.811033	1	0.12976	1	1	0.970946	0.387245	-0.243139	0.144106	-0.200833	-0.105191		-0.309591	-0.0219721	-0.241519		-0.118998	-0.0594811	-0.31352	-0.225035	-0.163056	0.0317954
Mg	Zm00001d036714	MGT2	0.0737924	0.00283454	0.981007		0.0271756	0.197571	0.593346	0.00266095	0.969647		0.263822	0.188291	0.195237		0.934495	1	0.486741	1	1	0.809646	0.402505	-0.286597	0.115909	-0.424455	0.0354706		-0.410237	-0.482509	-0.380842		-0.0637285	0.0416955	-0.228648	0.174708	0.105271	0.226123
Mg	Zm00001d003125	MGT3	0.416128	0.889052	0.656238		0.495735	0.75456	0.208989	0.887537	0.600904		0.982039	0.610577	0.331752		0.912112	1	0.291403	1	1	0.681704	0.237321	0.138291	0.375612	0.0470788	0.325227		0.0311044	-0.393426	0.455995		0.200193	-0.041557	0.745524	-0.105905	0.780411	0.751506
Mg	Zm00001d047388	MGT4	0.132476	0.607833	0.94903		0.110755	0.173802	0.974557	0.605041	0.918365		0.828587	0.518687	0.134542		0.840387	1	0.803227	1	1	0.603109	-0.251004	0.244449	-0.00655427	0.0772099	-0.0643147		0.116844	-0.234183	0.335713		-0.0807766	-0.0526237	-0.0570696	-0.0663559	0.00863187	-0.227414
Mg	Zm00001d033969	MGT5	0.685627	0.211057	0.994647		0.806886	0.783079	0.492281	0.208728	0.990647		0.919852	0.514789	0.405897		0.78187	1	0.924765	1	1	0.848624	0.0565808	0.0709039	0.127485	-0.178666	-0.0114275		-0.0755765	-0.265483	-0.228697		-0.101733	-0.0664451	0.0226978	-0.0818371	0.0894919	0.0994617
Mg	Zm00001d029808	MGT6	0.258015	0.517457	0.998388		0.19366	0.283918	0.961085	0.515519	0.995322		0.84808	0.643528	0.925024		0.964319	1	0.643015	1	1	0.776084	-0.221135	0.210403	-0.0107316	-0.0977108	-0.00705657		-0.116513	-0.202302	0.0320483		-0.0297528	-0.0265996	0.132415	-0.0216121	0.0773622	-0.206979
Mg	Zm00001d003666	MGT7	0.000231726	0.0231943	0.974664		3.59896e-05	0.0686109	0.0880613	0.0138099	0.955101		0.00403479	0.315689	0.611047		0.861774	1	0.979106	1	1	0.931973	1.96601	-1.07114	0.894869	-1.01617	-0.141519		-2.08895	-1.04942	0.44751		-0.490944	1.80432	-0.0463586	-0.235372	-0.13954	-0.369383
Mg	Zm00001d012102	MGT8	0.772372	0.0128216	0.993358		0.840853	0.872398	0.63792	0.0121337	0.988232		0.849156	0.199173	0.036356		0.856835	1	0.995425	1	0.605378	0.6157	0.0513757	0.0479045	0.0992803	-0.347362	-0.0152178		-0.128792	-0.444429	-0.540229		-0.0991292	-0.12636	0.00237564	0.00385938	0.458406	0.3039
Mg	Zm00001d042441	MGT9	0.700811	0.107872	0.90207		0.608151	0.776634	0.880055	0.105698	0.857806		0.977288	0.479206	0.0770664		0.897762	1	0.188681	1	1	0.963628	0.0959247	-0.0657575	0.0301672	-0.199213	-0.0933493		-0.0206711	-0.250068	-0.391057		-0.0467997	-0.0679579	-0.197004	-0.0972603	-0.179596	-0.0279927
Mg	Zm00001d027582	MGT10	0.389653	0.412818	0.622189		0.354745	0.412194	0.988967	0.406425	0.553755		0.240333	0.674316	0.323161		0.822639	1	0.975029	1	1	0.739297	0.277282	-0.282469	-0.00518638	-0.200224	-0.320786		-0.591968	-0.306498	0.418545		-0.363451	-0.0176567	-0.031481	-0.139746	-0.325195	-0.667399
Mg	Zm00001d033527	MGT12	0.771317	0.0274602	0.579113		0.827691	0.933298	0.706926	0.0265328	0.516395		0.368901	0.780008	0.158337		0.805664	1	0.875738	1	1	0.668502	0.05709	0.0273443	0.0844343	-0.324076	-0.237032		-0.365265	-0.171093	-0.415583		-0.223835	-0.300634	-0.0846214	-0.0881015	-0.381067	-0.456243
S	Zm00001d021596	APRL1	0.192668	0.192978	0.143313		0.418595	0.157953	0.528822	0.189709	0.107835		0.87745	0.362329	0.633473		0.804661	1	0.226115	1	1	0.838654	0.198233	-0.348247	-0.150014	0.235758	-0.445788		0.144103	0.453313	0.193263		-0.302439	-0.68089	-0.646733	-0.597269	-0.364087	-0.340379
S	Zm00001d006467	APRL2	2.06137e-05	0.883763	0.451848		0.013892	2.29643e-05	0.0807172	0.882166	0.391488		0.790211	0.633539	0.241708		0.877352	1	0.31698	1	1	0.848802	0.563402	-0.974344	-0.410942	0.0405001	-0.359429		0.218316	0.312302	-0.447602		-0.211249	-0.756642	-0.605934	-0.628761	-0.178522	0.355185
S	Zm00001d028162	SULTR1.2a	0.00540555	0.0071352	0.992184		0.0492891	0.446799	0.000991695	0.0058895	0.986434		0.0379272	0.866083	0.0108346		0.757524	1	0.334207	1	1	0.907858	0.524566	0.270598	0.795165	0.564428	0.0265114		0.8241	-0.152891	0.929356		0.449786	0.418166	-0.664829	-0.509103	-0.0443637	0.258381
S	Zm00001d048189	SULTR1.2b	0.820716	0.544545	0.958793		0.522034	0.833933	0.723333	0.509539	0.929065		0.176114	0.873359	0.300698		0.30609	1	0.474506	1	1	0.865562	0.533467	-0.235264	0.298202	-0.42852	-0.25652		-1.63615	-0.384843	1.10219		-2.23796	0.489786	1.11321	0.721138	-0.308583	-0.777763
S	Zm00001d050283	SULTR1.3	1.3954e-05	0.933669	1		0.148183	1.70932e-05	0.00441601	0.931439	0.999219		0.471727	0.39597	0.721822		0.497903	1	0.981008	1	0.950072	0.609091	-0.502014	1.36174	0.859726	0.0337421	-0.00174982		-0.531754	0.612037	0.209463		-0.95776	0.79337	0.0270596	0.578409	1.07569	-0.992914
S	Zm00001d028164	SULTR2.1	5.79825e-05	0.524202	0.834588		6.81403e-05	0.179725	0.0368826	0.522095	0.78012		0.613406	0.950502	0.966677		0.949141	1	0.0620603	1	1	0.805725	0.716509	-0.316853	0.399656	0.121233	-0.161289		0.26846	0.0572135	-0.0193705		0.0780417	-0.246874	-0.83303	-0.313919	-0.0581834	0.350432
S	Zm00001d027749	SULTR3.1	0.494768	0.725985	0.761265		0.485748	0.820793	0.252617	0.720497	0.693743		0.137911	0.946248	0.171784		0.754634	1	0.0074618	1	0.954481	0.838654	-0.210933	-0.092742	-0.303675	0.0942269	-0.243649		0.629382	-0.0739604	-0.511608		0.382892	-0.322506	-1.4064	0.214357	-0.781401	0.359663
S	Zm00001d002038	SULTR3.3	0.000184684	0.172648	0.56422		0.439464	0.00573315	1.77904e-05	0.168212	0.51548		0.807187	0.861807	0.286217		0.858872	1	0.162024	1	1	0.765886	-0.301293	-0.961151	-1.26244	0.391319	0.428827		0.291718	0.214401	0.598178		0.363413	0.0968457	1.23873	-0.239347	0.787482	0.803526
S	Zm00001d000204	SULTR3.4	0.949657	0.000905283	0.983082		0.950877	0.923305	0.959401	0.000691353	0.973911		0.159744	0.958564	3.91981e-06		0.979749	1	0.619036	1	1	0.663866	0.0206897	-0.035411	-0.0147213	-0.527306	-0.0334325		-0.471291	0.0447896	-1.1782		-0.0298383	-0.313771	-0.238838	0.153681	0.018781	0.476684
S	Zm00001d043614	SULTR3.5	0.869566	0.721964	0.766554		0.845922	0.799126	0.929172	0.711506	0.702551		0.491345	0.32466	0.487383		0.928201	1	0.361518	1	1	0.695499	-0.119481	0.172321	0.0528396	-0.163514	-0.40485		-0.677	0.877819	-0.492624		-0.229541	-0.0934181	-0.979632	-0.359788	-0.171546	-1.08729
S	Zm00001d005257	SULTR4.1	0.986166	0.234317	0.984771		0.902299	0.970078	0.844311	0.229845	0.975974		0.957377	0.918669	0.0135764		0.991036	1	0.11017	1	1	0.820824	-0.0310489	-0.0121064	-0.0431553	-0.173965	-0.0250938		0.0412445	-0.0671539	-0.57005		0.00823742	-0.127174	-0.407286	0.243508	0.15887	0.183835
S	Zm00001d038625	SiR	0.308673	0.632275	0.643322		0.225113	0.9697	0.172336	0.630278	0.581963		0.85203	0.461175	0.537875		0.768733	1	0.929668	1	1	0.880755	-0.2403	-0.0135036	-0.253804	0.0874791	-0.213187		0.133163	0.32094	-0.196248		-0.261536	-0.390434	-0.052511	0.00648952	-0.230931	-0.196935
B	Zm00001d030656	RTE	9.75878e-07	0.02162	0.903899		0.913535	3.7641e-06	8.44133e-07	0.0179404	0.856962		0.152938	0.00157627	0.445973		0.659867	1	0.244969	1	1	0.729596	-0.0406049	1.08614	1.04553	0.45754	-0.155561		0.578026	1.08804	-0.289086		0.495183	-0.218952	0.649323	-0.600034	-0.638628	-0.535828
B	Zm00001d041590	RTE2	4.74386e-09	0.108838	0.528946		0.298488	7.15056e-08	9.35352e-06	0.104459	0.466577		0.988919	0.779353	0.0113311		0.96367	1	0.649059	1	1	0.865255	-0.250058	1.08204	0.831985	-0.289482	-0.295539		0.0142438	-0.192282	-0.780659		0.0728167	-0.296685	-0.311066	-0.39522	-0.445128	-0.314022
B	Zm00001d039647	RTE3	0.011206	0.116751	0.981929		0.00424373	0.707302	0.0254527	0.111393	0.970745		0.13133	0.543932	0.783955		0.871323	1	0.930209	1	1	0.707348	0.765312	-0.159761	0.605551	-0.376401	0.052601		-0.734841	-0.424707	0.145978		-0.277471	0.547284	0.096361	0.0593284	0.420473	-0.764767
B	Zm00001d048447	RTE4	NA	NA	0.975092		NA	NA	NA	NA	NA		NA	NA	NA		NA	1	NA	1	1	1	0.95459	-0.534697	0.419892	-0.844911	-0.376356		0.477715	-1.66213	-1.84337		0	-0.120823	-2.69544	-1.01784	-0.147471	0
Fe	Zm00001d028360	DMAS1	3.6984e-06	0.0696449	0.657679		0.198591	0.00298069	2.64413e-07	0.0642746	0.587694		0.709887	0.696009	0.0582506		0.960596	0.795216	0.858197	1	0.950072	0.479252	0.329945	0.722926	1.05287	0.358841	0.274654		0.270589	0.274485	0.683312		0.0747437	0.852804	0.134854	-0.0969986	-0.773572	0.954812
Fe	Zm00001d052316	Ferritin	0.0743461	0.136467	0.992184		0.030347	0.643213	0.152154	0.131988	0.986869		0.893828	0.26946	0.0536264		0.766768	1	0.118964	1	1	0.976544	-0.440513	0.13974	-0.300773	-0.261875	0.019672		0.115743	-0.455014	-0.5709		-0.312195	0.047259	0.723556	0.102658	-0.0068366	-0.0585756
Fe	Zm00001d053281	NAAT1	2.18853e-05	1.01478e-05	0.217565		0.786085	2.87421e-07	7.20677e-10	2.36194e-06	0.127864		0.0104757	0.00750085	0.0559391		0.212217	0.0308042	0.872889	1	0.361382	0.341211	0.159221	2.04357	2.20279	1.44851	0.871212		1.71456	1.91973	1.28018		1.5792	2.1515	0.199439	0.555678	-2.05953	1.81261
Fe	Zm00001d048129	NRAMP1	0.00354921	0.0862424	0.942738		0.00160081	0.0460646	0.5124	0.0846031	0.911099		0.642817	0.578523	0.350156		0.769653	1	0.789661	1	1	0.652217	-0.45151	0.337438	-0.114072	0.218303	0.0695981		0.196784	0.224426	0.23846		0.167396	0.0373137	-0.0897872	0.305765	-0.0452198	-0.306583
Fe	Zm00001d034035	OPT7	0.130221	0.22418	0.704714		0.502521	0.0804676	0.271974	0.221164	0.645583		0.763278	0.330862	0.96087		0.854133	1	0.513789	1	1	0.592701	-0.151852	0.369502	0.21765	0.198964	-0.198781		0.185835	0.399387	0.0214439		-0.185119	-0.212213	-0.316258	0.0699013	-0.105635	-0.607839
Fe	Zm00001d041111	TOM1	0.42696	0.00553255	0.366375		0.969369	0.00534522	0.00113571	0.000868025	0.187262		0.0356679	0.00110138	0.702858		0.0549652	0.219183	0.660256	1	1	0.599443	0.0475796	2.16411	2.21169	1.87517	1.41768		2.47927	3.75168	0.528572		3.36241	3.0673	-0.832643	1.28186	-1.79817	1.99558
Fe	Zm00001d052435	TOM2	0.192868	0.756089	0.992007		0.563668	0.121142	0.314075	0.753913	0.985388		0.933775	0.790912	0.896274		0.213791	1	0.154189	1	1	0.915186	-0.40726	1.02157	0.614308	-0.188852	0.0608717		-0.221996	-0.497103	0.155322		-2.31481	-1.62362	1.87335	1.49326	-0.498444	-0.483356
Fe	Zm00001d005001	TOM3	0.364794	0.293312	0.920663		0.439622	0.336068	0.808289	0.287384	0.881794		0.953266	0.839031	0.0147971		0.685834	1	0.610428	1	1	0.884186	-0.172371	0.231718	0.0593472	0.178186	0.104928		0.0501438	-0.12767	0.641375		0.354889	0.137356	0.247802	-0.301176	0.0813668	-0.200478
Fe	Zm00001d017429	YS1	0.00241421	0.00188534	0.192734		0.657344	7.76401e-05	0.000234402	0.00117724	0.131748		0.0882255	0.0619765	0.220871		0.613736	0.210538	0.879921	1	0.960161	0.441358	-0.192503	1.29191	1.09941	0.816647	0.685046		1.01398	1.17126	0.684851		0.822322	1.68943	0.173092	0.671815	-1.1182	1.50516
Zn	Zm00001d031764	ZIP1	0.371391	0.417816	0.90207		0.23364	0.377438	0.907651	0.415115	0.85873		0.891592	0.95542	0.436077		0.545569	1	0.337289	1	1	0.924319	0.210235	-0.184415	0.02582	0.120946	0.101314		0.0973599	0.0423104	0.214414		0.309949	-0.00529352	0.269353	-0.173407	0.0440515	0.0912721
Zn	Zm00001d033446	ZIP2	0.00148568	0.00013383	0.749921		0.277398	0.000324016	0.0118691	8.96343e-05	0.672391		0.386284	0.165382	0.00128351		0.624911	0.913476	0.517624	1	1	0.829024	-0.415314	1.22463	0.809312	0.990649	0.345071		0.639742	0.92057	1.56056		0.894805	1.36637	0.664157	0.314973	-0.536694	-0.613112
Zn	Zm00001d034944	ZIP3	0.345411	0.0172705	0.942738		0.239155	0.647267	0.593784	0.0159413	0.911099		0.833764	0.722804	0.00138161		0.798265	1	0.795275	1	1	0.596907	0.241715	-0.125249	0.116466	-0.354333	-0.0844602		-0.140866	-0.190973	-0.815371		-0.178071	-0.103746	-0.102811	-0.12843	-0.0817906	0.419584
Zn	Zm00001d002343	ZIP4	2.00266e-07	7.12374e-10	0.761535		1.46663e-14	0.000669768	0.000390377	1.65783e-10	0.702551		0.0237444	0.0373204	6.96314e-08		0.507732	1	0.83276	1	1	0.688562	-2.00904	1.04518	-0.963854	1.37704	-0.289583		1.01141	1.06908	2.16134		-0.981119	0.348599	-0.233309	-0.101406	0.430932	-0.863248
Zn	Zm00001d049375	ZIP5	0.133334	0.0601149	0.591912		0.0379265	0.594675	0.211227	0.0583536	0.528383		0.438171	0.705695	0.425007		0.607625	1	0.709438	1	1	0.674359	-0.433048	0.160047	-0.273001	0.323904	-0.266015		0.379773	0.242525	0.291676		-0.528885	0.107684	-0.238127	-0.138695	-0.0995853	-0.587236
Zn	Zm00001d053665	ZIP6	0.2084	0.0131128	0.975366		0.659051	0.134193	0.267343	0.0124815	0.958308		0.833221	0.167149	0.0547498		0.739588	1	0.157648	1	1	0.95354	-0.0930088	0.283594	0.190585	0.317129	0.0416311		0.12687	0.430893	0.460037		0.195177	0.180047	-0.384756	-0.115088	-0.353868	0.0575973
Zn	Zm00001d036965	ZIP7	0.0621904	3.71167e-07	0.897708		0.609637	0.00181755	0.00663706	1.13831e-07	0.85423		1.06529e-10	0.0367337	0.721508		0.838602	1	0.584726	1	1	0.87759	-0.168655	0.827344	0.658689	0.994639	0.166572		1.76059	0.82153	0.152442		-0.266347	0.559356	0.354219	-0.463776	0.417783	-0.283188
Zn	Zm00001d037756	ZIP8	0.292021	0.117426	0.788232		0.5028	0.167583	0.462075	0.115505	0.731015		0.60894	0.373078	0.818206		0.850018	1	0.314899	1	1	0.680325	-0.144649	0.291655	0.147006	0.234781	-0.161118		0.24459	0.359439	0.0817649		-0.160226	0.0324359	-0.382716	-0.153783	-0.0974949	-0.409265
Zn	Zm00001d038437	ZIP9	0.569743	1.11046e-24	0.956623		0.548116	0.2264	0.52169	4.95206e-26	0.928716		1.13691e-08	1.15722e-06	8.21211e-09		0.827885	1	0.943306	1	1	0.977205	-0.19996	0.395926	0.195965	1.94535	0.101637		1.89726	1.84056	2.11328		0.359626	0.665522	-0.0772583	-0.868097	-0.0115538	-0.0778991
Zn	Zm00001d019228	ZIP10	0.0159408	0.516573	0.909889		0.469325	0.21975	0.0127069	0.512031	0.866832		0.93042	0.612481	0.03996		0.923209	1	0.315872	1	1	0.986157	0.16711	0.287277	0.454387	-0.120774	-0.116987		-0.076687	0.25183	-0.563016		-0.100535	-0.0208352	-0.433668	-0.187265	-0.297973	-0.0350895
Zn	Zm00001d010838	ZIP11	0.240494	0.0356057	0.958215		0.139653	0.556035	0.519745	0.0342894	0.933212		0.19467	0.270971	0.926368		0.451926	1	0.885227	1	1	0.799917	0.294641	-0.156108	0.138532	-0.320747	-0.0685565		-0.453188	-0.427684	-0.0373918		-0.405334	-0.0121999	0.0604714	0.0291225	0.303869	-0.23814
Zn	Zm00001d023590	ZIP12	0.056833	0.702569	1		0.182064	0.047676	0.506562	0.701124	0.999029		0.627731	0.855016	0.546963		0.983976	1	0.828597	1	1	0.832381	0.238013	-0.363195	-0.125182	-0.066126	-0.000974581		-0.213956	-0.107342	0.172755		0.0127464	-0.000362477	0.0660997	-0.127345	0.0148329	0.152292
K	Zm00001d036621	HAK1	0.00169718	0.0154043	0.676088		0.124536	0.341648	0.00207292	0.0133758	0.597818		0.909079	0.195609	0.0523318		0.754396	1	0.0906837	1	1	0.866436	0.607103	0.45329	1.06039	0.72933	-0.429487		0.19596	0.964425	1.08576		-0.690144	0.190385	-1.67697	-0.412877	0.124772	-0.526542
K	Zm00001d026289	HAK2	0.156781	0.00183296	0.788919		0.49074	0.131273	0.399144	0.00160891	0.72772		0.406971	0.555958	0.00364222		0.958376	1	0.175581	1	1	0.914399	-0.184754	0.391337	0.206583	-0.531305	-0.202622		-0.40424	-0.333821	-0.924224		0.0811095	-0.121027	-0.767238	-0.0105549	-0.650037	-0.209932
K	Zm00001d002269	HAK3	NA	NA	0.99679		NA	NA	NA	NA	NA		NA	NA	NA		NA	1	NA	1	1	0.957442	0.893492	-0.77995	0.113541	-0.501978	0.340485		-0.243628	-2.00141	0.668542		-0.283976	-0.601711	4.31856	-0.530004	0	-2.27232
K	Zm00001d049987	HAK4	3.66589e-05	0.0266886	0.39051		0.00947949	0.332208	2.4728e-05	0.0225085	0.325243		0.317649	0.984533	0.0199714		0.854654	1	0.262933	1	1	0.681733	0.8628	0.427593	1.29039	-0.627396	-0.561924		-0.721312	-0.031108	-1.19801		-0.385958	-0.431549	-1.0429	0.0258515	-0.751796	-1.01053
K	Zm00001d042244	HAK5	9.27843e-16	0.0802969	0.962923		0.360787	1.7463e-08	3.9874e-14	0.0764499	0.939047		0.46199	0.570705	0.563986		0.517434	1	0.578494	1	1	0.598041	0.450702	2.25251	2.70322	-0.625319	0.144446		-0.740084	-0.634055	-0.436684		-1.25223	0.378972	0.64902	1.8541	0.569057	-1.38516
K	Zm00001d022449	HAK7	0.735969	0.34616	0.993358		0.492651	0.765364	0.77629	0.342154	0.988396		0.965528	0.141793	0.836249		0.822581	1	0.149981	1	1	0.90176	-0.163517	0.0917997	-0.0717177	-0.169066	-0.0161713		0.0401589	-0.53822	-0.0793377		-0.224482	-0.212643	0.605437	0.178223	0.367251	0.175078
K	Zm00001d029072	HAK8	0.000108057	0.0761618	0.641783		0.000839673	2.62079e-05	0.36173	0.0730266	0.581344		0.821201	0.926649	0.0266364		0.390815	1	0.573639	1	1	0.76842	0.635499	-0.840109	-0.20461	0.302871	0.242467		0.169825	0.0802381	0.674292		0.68155	0.131722	0.306553	-0.307242	0.156954	0.425088
K	Zm00001d036622	HAK10	0.00224162	0.0195241	0.702178		0.157311	0.305635	0.00236881	0.0173234	0.631835		0.905379	0.209093	0.0700726		0.770245	1	0.109603	1	1	0.878541	0.567018	0.480982	1.048	0.70592	-0.409028		0.203796	0.944854	1.02207		-0.656915	0.166792	-1.59962	-0.385188	0.119922	-0.487196
K	Zm00001d002333	HAK13	3.75935e-13	0.0257254	0.927888		1.62411e-08	0.101603	2.45135e-16	0.0203473	0.890095		0.837517	0.123191	0.000396838		0.830284	1	0.71563	1	1	0.949941	-1.50447	-0.577208	-2.08167	0.559717	-0.160681		-0.212287	0.8081	1.42478		0.346709	-0.533168	0.319453	-0.7003	-0.934204	0.162099
K	Zm00001d021592	HAK14	0.0511615	0.300656	0.961396		0.326155	0.460278	0.0282078	0.298845	0.937978		0.613458	0.965288	0.53836		0.872337	1	0.395929	1	0.941243	0.730637	0.16636	0.147974	0.314334	-0.137989	-0.0509114		-0.201806	-0.030994	-0.160651		-0.0747227	-0.0483111	0.177335	0.0739691	-0.288599	-0.192106
K	Zm00001d002359	HAK15	0.329956	0.8768	1		0.431889	0.255363	0.696981	0.87555	0.998472		0.746111	0.519088	0.64505		0.613307	1	0.712821	1	1	0.808264	-0.135701	0.205111	0.0694108	-0.0262307	-0.00209973		-0.147738	0.23048	-0.119701		0.218723	-0.0975683	0.0987477	-0.192726	-0.0665873	-0.163208
K	Zm00001d024300	HAK16b	0.0399261	0.619465	0.954065		0.305035	0.442018	0.022384	0.617852	0.92818		0.893583	0.724809	0.924487		0.960596	1	0.0419108	1	1	0.823991	-0.22084	-0.196635	-0.417475	-0.0949791	0.0726653		-0.112447	-0.204483	0.039411		-0.0543293	-0.107813	0.779925	0.71854	0.142081	0.276958
K	Zm00001d020674	HAK17	0.96861	0.0427958	0.960317		0.881213	0.9286	0.964007	0.0410682	0.935124		0.0755587	0.744029	0.739034		0.991006	1	0.111027	1	1	0.979678	-0.0433946	0.0311994	-0.0121952	-0.31963	-0.0690588		-0.565374	-0.192499	-0.120091		-0.014265	-0.0626357	-0.671765	-0.163447	-0.0395266	-0.045686
K	Zm00001d033424	HAK18	NA	NA	0.939651		NA	NA	NA	NA	NA		NA	NA	NA		NA	1	NA	1	1	NA	-0.51509	0.0536167	-0.461473	0.0923031	-0.578531		-0.443337	1.15731	-0.293251		-2.71811	1.14721	0	-0.471517	-0.984105	0.495828
K	Zm00001d003115	HAK19	NA	NA	NA		NA	NA	NA	NA	NA		NA	NA	NA		NA	NA	NA	NA	NA	NA	-0.850477	-0.104669	-0.955146	-0.317495	-0.229709		-0.709127	0.232619	0		NA	NA	NA	NA	NA	NA
K	Zm00001d003859	HAK20	7.78665e-08	0.267039	0.995981		1.28996e-05	0.465304	8.9573e-09	0.20156	0.99212		0.307862	0.206122	0.0271127		0.874321	1	0.818991	1	1	0.934095	2.6214	0.656352	3.27775	0.73715	-0.0414945		1.28391	-1.54698	1.99693		0.542333	1.50027	-0.440084	-0.488835	-0.70077	-0.42779
K	Zm00001d020325	HAK23	0.000544436	0.20334	0.94874		0.602805	0.00854392	0.000129864	0.201208	0.917437		0.750561	0.720564	0.481301		0.98144	1	0.376425	1	1	0.977205	-0.105103	-0.44193	-0.547033	0.176908	-0.0688592		0.163839	0.173548	0.195444		0.0186298	-0.0156391	-0.265117	-0.18438	-0.345796	-0.0337325
K	Zm00001d019631	HAK24	0.414129	0.942256	0.916656		0.61393	0.770646	0.306549	0.94117	0.87705		0.863843	0.884207	0.991754		0.885942	1	0.781567	1	1	0.885228	0.106064	0.0752595	0.181324	-0.0146408	-0.0940356		-0.114601	0.0918385	0.00458056		-0.111146	-0.00788481	-0.116383	0.038542	-0.182066	-0.15242
K	Zm00001d017925	HAK25	0.254332	0.0955427	0.98243		0.167821	0.714812	0.404145	0.0927851	0.972154		0.732566	0.885786	0.0746632		0.707879	1	0.511791	1	1	0.879976	-0.250832	0.0941724	-0.15666	0.237451	0.0302612		0.17994	0.0919424	0.454671		0.254909	-0.000498436	-0.229441	-0.219239	0.224243	-0.155518
K	Zm00001d046679	HAK26	0.546249	0.836863	0.952197		0.477098	0.548978	0.993124	0.835308	0.92468		0.604661	0.906679	0.347599		0.96516	1	0.0467236	1	1	0.884186	0.152238	-0.150025	0.00221337	0.0411325	-0.0712656		0.239161	0.0833916	-0.271072		0.0348371	-0.0273285	-0.554689	-0.278491	-0.127517	0.137315
K	Zm00001d038252	KCH2	0.615198	0.921897	0.971483		0.427674	0.889433	0.542509	0.915762	0.951227		0.848312	0.0609449	0.290892		0.988339	1	0.597681	1	1	0.884186	-0.499019	0.126139	-0.37288	0.0669853	-0.150682		-0.369591	1.66456	-0.855254		0.0484563	0.27804	-0.745184	-0.029288	-0.371685	-0.582028
K	Zm00001d037289	ZORK	0.186574	0.054247	0.817229		0.811744	0.200064	0.0550889	0.0520623	0.75967		0.513637	0.563043	0.385174		0.540832	1	0.169897	1	1	0.898479	0.115892	0.5282	0.644091	0.541364	0.291249		0.553123	0.518404	0.503149		1.06264	-0.00451826	1.24453	0.057478	-1.03779	0.388858
N	Zm00001d025831	AMT1	0.0115506	0.000974623	0.992007		0.00288585	0.0276064	0.73594	0.000828371	0.986434		0.252996	0.367846	0.0209287		0.794514	1	0.0868049	1	1	0.816447	-0.730166	0.621434	-0.108732	0.654205	0.0259192		0.578706	0.523076	0.879226		-0.389178	-0.403111	1.0977	0.59687	0.465951	-0.46707
N	Zm00001d017249	AMT2	0.000294314	1.84824e-12	0.975366		0.110423	7.20035e-06	0.00393224	3.22746e-13	0.958351		0.00571285	0.00118049	2.70939e-07		0.835634	1	0.957139	1	1	0.852764	-0.50509	1.30475	0.799662	1.54387	-0.0766411		1.19856	1.47582	2.05866		-0.400479	0.65288	0.0675422	-0.33222	0.0644654	-0.479151
N	Zm00001d003025	AMT3	0.0172627	0.378484	0.891003		0.697021	0.0157815	0.0317716	0.376109	0.84714		0.941495	0.64796	0.636721		0.765452	1	0.382946	1	1	0.935921	-0.250673	1.20429	0.953613	-0.38064	0.307112		-0.170869	-0.631596	-0.386137		-0.877769	0.732832	1.15866	1.46801	0.218761	-0.344505
N	Zm00001d013270	AMT4	0.127837	0.354709	0.99399		0.333568	0.512013	0.0396007	0.33303	0.989149		0.0941991	0.923695	0.954594		0.969172	1	0.188978	1	1	0.983671	0.685454	0.538479	1.22393	-0.535642	-0.0482451		-1.88212	0.233468	0.0730596		-0.160706	1.76967	-2.39691	0.144402	0.0773347	-0.137802
N	Zm00001d012261	AMT7	0.00332986	0.00648352	0.955875		0.000185691	0.356189	0.0190182	0.00297339	0.926703		0.001937	0.202059	0.817115		0.835797	0.416159	0.969295	1	1	0.837229	1.83959	-0.638352	1.20124	-1.21891	-0.208993		-2.26499	-1.28416	0.230804		-0.574839	2.10141	-0.0680211	0.0260002	-0.531179	-0.776061
N	Zm00001d016771	NH4 transporter2	0.00557892	0.1945	0.948763		0.0730561	0.0029218	0.242237	0.192177	0.917158		0.7028	0.838411	0.37063		0.94184	1	0.569379	1	1	0.762271	-0.504116	0.841672	0.337555	0.309612	-0.118655		0.316128	0.197657	0.410448		-0.145808	0.179252	-0.506726	0.00578524	0.264262	-0.69788
N	Zm00001d038412	NH4 transporter2	0.192294	0.902678	0.978997		0.304564	0.142566	0.636639	0.901738	0.965353		0.784583	0.912059	0.879053		0.887422	1	0.542418	1	1	0.942878	-0.222996	0.33137	0.108374	0.0275277	0.0415545		0.178768	-0.0868162	-0.0605603		-0.144241	-0.103472	0.295135	0.511302	0.482171	-0.108841
N	Zm00001d034782	NH4 transporter2	0.11543	0.167361	0.904118		0.580598	0.339294	0.0505399	0.164496	0.864361		0.920417	0.502979	0.299636		0.877598	1	0.524824	1	1	0.876364	0.154514	0.273356	0.427871	-0.266107	0.137788		-0.103037	-0.37053	-0.37932		-0.194449	-0.162916	0.382234	0.7127	0.524444	0.273216
N	Zm00001d054060	NRT1	1.03511e-11	0.000377945	0.957805		0.545564	4.25412e-08	3.58246e-07	0.000112733	0.926068		0.0313675	0.984533	4.29866e-05		0.967442	0.827412	0.757401	1	1	0.594163	-0.358638	2.464	2.10537	1.37386	-0.187316		1.50155	-0.039605	2.52319		0.125925	1.65205	-0.427512	-0.480741	-0.440028	-1.48913
N	Zm00001d054057	NRT2	1.617e-12	0.00202711	0.991331		0.908722	5.00928e-08	7.23963e-09	0.000621998	0.984515		0.0369518	0.965744	0.00118757		0.997437	0.797248	0.361016	1	1	0.829145	-0.101981	2.95656	2.85458	1.48703	-0.0654243		1.8091	-0.112791	2.51835		0.0146833	1.98802	-1.24886	0.00781428	0.0350764	-0.855423
N	Zm00001d014976	NRT3	0.955933	0.000261426	0.26144		0.582421	0.182813	0.411679	4.13653e-06	0.14175		0.580307	0.578535	4.7235e-06		0.0791869	1	0.0658283	1	1	0.891085	0.627843	-1.46391	-0.83607	3.08857	1.84443		1.27868	1.29144	6.04274		3.83357	0.290875	3.27384	-1.21035	1.46168	0.806688
N	Zm00001d003287	NRT4	0.823182	0.000243804	0.975608		0.76273	0.812211	0.477853	0.000210116	0.959537		0.0120437	0.394953	0.135977		0.835704	1	0.858839	1	1	0.925745	0.120201	0.109663	0.229864	-0.793012	-0.0712549		-1.09433	-0.550743	-0.653127		-0.361241	0.420297	-0.183372	-0.246234	0.470331	-0.250049
N	Zm00001d011679	NRT5	0.00125056	0.441128	0.980278		0.0556444	0.544076	0.00252933	0.399859	0.967292		0.583571	0.707034	0.0186382		0.868737	1	0.684191	1	1	0.663866	1.0784	0.472701	1.5511	0.431657	-0.114546		-0.752265	0.584554	1.80914		-0.466345	1.45565	-0.600744	0.739282	-0.0502957	-1.40614
N	Zm00001d017095	High aff N transp	2.27182e-11	2.64825e-09	0.949368		0.991419	4.80573e-10	1.05194e-11	6.74218e-10	0.917158		0.0427265	0.0313916	3.69913e-08		0.784259	1	0.795368	1	1	0.609281	-0.00483635	1.57368	1.56885	1.20396	0.118758		0.835782	0.954269	1.94256		0.420948	0.776752	0.231329	-0.277583	0.145988	-0.882963
N	Zm00001d044504	High aff N transp 2.7	9.15993e-12	0.0031002	0.986497		0.832868	2.2949e-08	4.94787e-09	0.00142498	0.975968		0.337532	0.578361	0.00545098		0.993667	1	0.38839	1	1	0.932375	-0.265454	4.34408	4.07862	2.04579	0.127155		1.7283	1.26567	3.07032		0.0495795	3.07502	-2.41883	-0.659647	-0.270133	-0.546827
P	Zm00001d040125	PHO1-1	0.771242	0.0975188	0.258448		0.973754	0.836001	0.825948	0.0926345	0.187262		0.996926	0.085404	0.514038		0.969364	1	0.345456	1	0.497304	0.911807	0.0144831	-0.0916593	-0.0771762	0.373735	-0.508198		0.00570575	0.862342	0.311657		-0.0748169	-0.194385	-0.68795	-0.986196	-1.52014	-0.26249
P	Zm00001d051945	PHO1-2	0.0952918	0.64523	0.167708		0.597903	0.12654	0.298344	0.637007	0.113726		0.937415	0.758102	0.0219116		0.817633	1	0.588334	1	1	0.503306	-0.191613	0.512331	0.320718	0.13693	-0.610479		-0.108972	-0.283091	0.981096		-0.410568	-0.192605	-0.471609	-0.999586	-0.457778	-1.2616
P	Zm00001d018445	PHO1-2	0.0134274	0.193421	0.233868		0.246439	0.500874	0.0211152	0.186777	0.172814		0.981918	0.107234	0.762544		0.830858	1	0.169527	1	1	0.6157	0.323029	0.233357	0.556386	0.287155	-0.487392		-0.0286663	0.778039	0.15049		-0.334439	-0.0317394	-0.920406	-0.494141	-0.742351	-0.86348
P	Zm00001d037468	PHO1-3	1.23868e-08	0.896013	0.998701		0.023959	0.00185617	2.03856e-10	0.888578	0.995624		0.178662	0.00124453	0.705119		0.573336	1	0.427198	1	0.881791	0.914779	-0.836076	-1.20091	-2.03699	0.0613467	-0.0161913		-0.817024	1.62515	-0.232902		0.903528	-0.274738	-0.714277	-0.0327876	-1.29754	0.308023
P	Zm00001d014116	PHT1	0.0432919	0.00013107	0.986631		0.00785037	0.930506	0.00349295	9.02089e-05	0.978632		0.989476	5.14602e-06	0.000954955		0.897636	1	0.205451	1	1	0.822242	-0.494218	-0.0303874	-0.524605	0.563675	-0.0271613		-0.0102609	1.09	0.798716		0.124199	0.0404498	-0.509062	0.119948	-0.131432	-0.280962
P	Zm00001d032850	PHT2	0.00227264	6.45491e-05	0.681792		0.123316	0.0300096	5.7855e-06	4.2815e-05	0.630761		0.856597	0.0200547	4.75883e-05		0.974825	1	0.143449	1	1	0.997271	-0.359884	-0.525092	-0.884976	0.672203	0.242839		0.150614	0.819908	1.19933		0.0457683	0.110075	0.758491	0.63646	0.571973	-0.0243484
P	Zm00001d004301	PHT3	0.0128851	0.051783	0.56422		0.53413	0.301371	0.0330311	0.0458745	0.496763		0.913845	0.661793	0.0147238		0.593451	1	0.991177	1	1	0.599443	0.438225	0.73064	1.16887	0.923998	-0.765375		0.285185	0.704587	2.01375		-1.53046	-0.0541736	-0.022974	0.0127366	0.62789	-1.773
P	Zm00001d025028	PHT4	0.00846613	0.409716	0.999244		0.0092302	0.951317	0.0114908	0.389786	0.996215		0.212884	0.554692	0.296471		0.917849	1	0.524004	1	1	0.966731	1.57834	-0.0650011	1.51334	-0.486636	0.0238754		-1.74132	-0.821278	0.952924		0.366678	-0.862538	0.877914	-0.223962	-0.4643	-0.218261
P	Zm00001d011498	PHT6	0.000601279	0.167642	0.977976		0.00121019	0.00693192	0.889383	0.127157	0.962266		0.0132368	0.682244	0.339024		0.826395	0.262511	0.930209	1	1	0.921646	1.70531	-1.59764	0.107667	-0.727226	-0.132096		-1.97054	-0.622498	0.830161		-0.636346	2.41402	0.162344	-0.191643	-0.639518	-0.43303
P	Zm00001d031875	PHT7	0.487404	5.43611e-06	0.729555		0.00778453	0.368251	0.180442	1.48828e-06	0.659913		0.967729	1.67708e-09	0.000318106		0.912427	1	0.26953	1	1	0.594163	-0.699651	0.320154	-0.379497	0.962788	-0.285202		0.0460518	1.90552	1.20296		-0.163402	-0.118292	-0.683614	0.162533	-0.721391	-0.844053
P	Zm00001d004306	PHT8	3.82076e-05	0.689171	0.884935		0.0761561	3.30053e-05	0.019081	0.666409	0.832159		0.141573	0.607553	0.0117533		0.795317	1	0.685959	1	1	0.784534	0.84515	-1.89374	-1.04859	0.205512	-0.323247		-1.05107	0.548199	1.49487		-0.62021	1.1097	-0.514743	-0.0445577	0.166686	-0.872687
P	Zm00001d027700	PHT9	2.69077e-05	6.80954e-07	0.983191		5.80973e-08	0.513732	1.71151e-11	8.00094e-08	0.973561		0.740832	1.44536e-06	1.25337e-05		0.645545	1	0.841578	1	1	0.776823	-1.81576	-0.343425	-2.15919	1.47003	-0.0641051		0.358602	2.31072	2.08912		0.793683	0.707367	0.233752	-0.432608	-0.719151	-0.732721
P	Zm00001d027549	PHT10	0.275876	NA	0.822871		NA	0.764285	NA	NA	NA		NA	NA	NA		NA	1	NA	1	1	0.874754	-1.22156	0.544831	-0.676726	-0.55935	0.847474		-0.90532	-0.0879761	-0.623553		0.521628	0.814231	0.227876	0.43178	0.906658	1.45325
P	Zm00001d019480	PHT11	0.00920566	0.928698	0.952197		0.0349542	0.0501411	0.953603	0.917611	0.920433		0.0283288	0.260957	0.168198		0.745875	0.780123	0.536928	1	1	0.779412	1.38327	-1.43736	-0.0540886	0.0817502	-0.278277		-1.9768	1.27948	1.22435		-0.906889	2.63913	-0.891397	0.0523468	0.17622	-1.0831
P	Zm00001d004308	PHT12	1.07323e-06	1.34676e-06	0.516359		0.0265983	1.56207e-07	9.67374e-18	3.35418e-07	0.434478		0.740503	0.000482434	4.09986e-06		0.861895	1	0.745519	1	1	0.416985	-0.743746	-1.70489	-2.44864	1.26561	-0.492213		0.335969	1.68375	2.09869		-0.332232	-0.022966	-0.340325	-0.0706935	-0.637892	-1.58412
AQP	Zm00001d017526	PIP1-2	0.0712142	0.0446628	0.960317		0.0717798	0.998663	0.0617415	0.0414677	0.934582		0.254139	0.981889	0.116465		0.637412	1	0.384939	1	1	0.970202	0.558566	0.000874723	0.559441	0.500546	-0.109297		0.669855	0.0313776	0.724672		0.757534	-0.0378035	-0.735727	0.0190454	-0.790154	0.123529
AQP	Zm00001d051872	PIP1-5	1.35811e-09	0.000571209	0.950347		0.00306734	0.00130038	5.03247e-13	0.000455451	0.917882		0.0172009	0.18976	0.432447		0.675349	1	0.767765	1	0.715105	0.990487	0.791724	0.926938	1.71866	0.744558	-0.121844		1.01829	0.728449	0.373265		0.625219	0.0616288	-0.271637	0.0561075	-1.30915	0.0490503
AQP	Zm00001d020383	PIP1-6	8.9911e-12	0.0013729	0.977787		0.000173792	0.000436136	5.24465e-17	0.000666405	0.961415		0.000474006	0.782681	0.358294		0.923244	1	0.721151	1	0.875924	0.960453	1.63227	1.66769	3.29996	1.21349	-0.113001		2.23775	0.406057	0.686576		0.279787	0.365998	0.505611	-0.130111	-1.78703	-0.224569
AQP	Zm00001d019563	PIP2-1	0.712861	0.102295	0.950843		0.936951	0.542669	0.523462	0.100238	0.919845		0.854091	0.561678	0.188488		0.824245	1	0.46584	1	1	1	0.0246189	-0.169819	-0.1452	0.273198	-0.0836862		0.14454	0.298551	0.414002		0.236266	-0.099731	-0.363504	0.057746	-0.409793	0.011367
AQP	Zm00001d022608	PIP2-2	1.74317e-08	0.00908339	0.956623		0.246147	2.45222e-07	2.87219e-05	0.00598036	0.924387		0.54946	0.342733	0.0336099		0.924819	1	0.338778	1	1	0.939692	-0.808028	2.92369	2.11567	-1.27199	-0.240514		-0.921813	-1.37024	-1.72091		-0.343338	1.28653	-1.67493	1.45798	-1.6432	-0.36838
AQP	Zm00001d014285	PIP2-2	0.0570016	0.00339145	0.756673		0.802293	0.0239723	0.0305328	0.00317149	0.705357		0.277596	0.138615	0.28178		0.876626	1	0.234114	1	1	0.865562	-0.072192	0.497353	0.425161	0.46052	0.194227		0.448432	0.586406	0.36153		0.183048	0.184292	0.60765	0.433411	-0.00819266	0.274202
AQP	Zm00001d005410	PIP2-2	5.35743e-06	0.139541	0.822871		0.00104338	0.445127	3.97682e-06	0.133515	0.735284		0.750149	0.566375	0.566391		0.886785	1	0.886832	1	1	0.818105	2.08854	0.658738	2.74728	0.858042	-0.610154		0.767579	0.980559	0.660493		-0.68456	1.37165	-0.336152	-0.682254	-1.84565	-1.16234
AQP	Zm00001d005421	PIP2-2	0.0106803	0.470241	0.713812		0.118038	0.62297	0.0129045	0.467094	0.649051		0.959545	0.6667	0.477955		0.997036	1	0.387514	1	1	0.911415	0.376278	0.164408	0.540686	0.157055	-0.243023		-0.0573277	0.284956	0.283524		-0.00717074	-0.0786483	-0.544492	-0.147642	-0.5131	-0.225258
AQP	Zm00001d051174	PIP2-3	6.17696e-08	4.95676e-06	0.952197		0.423377	4.71689e-06	2.87762e-10	3.01444e-06	0.921788		0.00820976	0.0602351	0.0768437		0.830767	1	0.992533	1	0.715615	0.969518	0.280828	1.31051	1.59134	1.01425	-0.123006		1.17068	0.992972	0.797792		0.39217	0.387232	-0.0114996	-0.0321031	-1.42658	-0.125416
AQP	Zm00001d017288	PIP2-4	0.00195116	0.000109384	0.974898		0.0423025	0.234406	9.47305e-05	8.02305e-05	0.9537		0.0460846	0.115275	0.10796		0.592714	1	0.649377	1	0.974448	1	0.690556	0.494788	1.18534	0.994384	-0.0929085		1.08711	1.00503	0.840816		0.970511	0.301439	-0.50147	-0.0066213	-1.24482	-0.0265718
AQP	Zm00001d003006	PIP2-5	3.17945e-08	2.7443e-05	0.958501		0.00880738	0.000820431	2.6396e-12	1.70178e-05	0.929743		0.00207919	0.173529	0.195315		0.570084	1	0.777575	1	0.836282	0.999397	0.816202	1.09627	1.91247	1.02824	-0.122064		1.42502	0.852183	0.65476		0.917681	0.105919	-0.304149	0.0887178	-1.35557	0.0319561
AQP	Zm00001d019565	PIP2-6	2.47085e-09	0.118181	0.999608		0.000872998	0.0503484	5.91993e-10	0.111975	0.99645		0.24877	0.994936	0.369831		0.577952	1	0.767242	1	1	0.919604	1.28097	0.899672	2.18064	0.551651	-0.0150654		0.914808	0.0115571	0.605597		1.12247	0.0341438	0.393219	0.0745362	-1.03335	-0.367764
PAP	Zm00001d048090	PAP1a	0.190036	0.0652289	1		0.367724	0.63044	0.0799289	0.0632031	0.997494		0.832561	0.192927	0.379798		0.723519	1	0.961868	1	1	0.76842	-0.20222	-0.136904	-0.339124	0.296434	-0.00521207		0.153704	0.499906	0.284151		0.336199	-0.198875	0.0310562	-0.265418	-0.214227	0.384524
PAP	Zm00001d006374	PAP1b	0.000569973	0.900191	0.805834		0.241123	0.0529217	0.000114472	0.899257	0.752088		0.706219	0.96035	0.481936		0.869182	1	0.998843	1	1	0.857589	0.214457	0.357348	0.571805	0.0242808	0.143587		0.188518	0.0389287	-0.200493		0.10452	0.15407	-0.000580708	0.18217	0.107046	0.158043
PAP	Zm00001d030765	PAP1c	6.42279e-05	2.77573e-05	0.90624		0.000228338	0.221806	1.31572e-08	1.53873e-05	0.861319		0.947697	8.53458e-10	0.00586189		0.877932	1	0.274859	1	1	0.657317	-0.71047	-0.312244	-1.02271	0.668442	-0.130499		0.0558109	1.45623	0.712707		0.157313	-0.136239	-0.494076	-0.0758444	-0.353718	-0.519289
PAP	Zm00001d018653	PAP2a	1.27801e-07	0.0213603	0.948763		4.17775e-05	0.337391	7.49241e-09	0.0198839	0.917882		0.930241	0.00145006	0.114616		0.851896	1	0.245637	1	0.981681	0.628245	-0.565809	-0.186763	-0.752572	0.280882	-0.0653695		-0.0583628	0.682717	0.339381		0.0906983	-0.134218	-0.251419	0.206133	-0.283948	-0.263579
PAP	Zm00001d012574	PAP2b	6.00104e-11	0.698395	0.858938		6.60739e-05	1.56622e-10	0.0170154	0.681497	0.804834		0.252018	0.300585	0.00826654		0.868577	1	0.791008	1	1	0.75847	1.30826	-2.12749	-0.819228	-0.15211	-0.273419		-0.728718	-0.717281	1.25334		-0.33663	0.406474	-0.303011	-0.154884	-0.192046	-0.806725
PAP	Zm00001d024395	PAP2c	0.129962	0.317765	0.999515		0.159212	0.961423	0.172516	0.308179	0.997027		0.683368	0.912277	0.266742		0.90855	1	NA	1	1	0.938475	-1.24021	0.0816322	-1.15858	0.754182	-0.0264613		0.915	-0.397359	1.64888		0.582141	-0.467105	0.395203	-0.423584	-1.84675	0.556201
PAP	Zm00001d012573	PAP2d	0.0969758	0.184189	0.94024		0.0667742	0.208056	0.788866	0.181435	0.908138		0.908241	0.410451	0.467752		0.858453	1	0.481347	1	1	0.867035	0.484588	-0.395175	0.0894124	-0.299355	0.121762		-0.135674	-0.492268	-0.324472		-0.289031	-0.0208213	0.534978	0.127818	0.557641	0.378305
PAP	Zm00001d037680	PAP7	1.0012e-05	0.00363789	0.931576		0.0740172	6.94598e-06	0.00722483	0.0029507	0.896928		0.465502	0.000727143	0.766966		0.901075	1	0.728227	1	1	0.868862	0.476389	-1.13264	-0.656248	-0.593227	0.131102		-0.422062	-1.26564	-0.141018		-0.201528	0.409087	0.288811	0.523305	-0.02631	-0.35747
PAP	Zm00001d053094	PAP7a	NA	0.800298	0.885307		0.685532	0.256453	0.44333	0.731925	NA		NA	NA	NA		NA	1	NA	1	1	0.896453	-0.934377	2.38159	1.44722	-0.617951	-0.982736		0.722758	-0.408574	-3.18456		-0.224174	-0.948494	-1.21481	-0.530011	-2.56746	2.45968
PAP	Zm00001d053099	PAP7b	0.347185	0.59194	0.994169		0.822977	0.45384	0.201971	0.583836	0.989594		0.956845	0.563762	0.980105		0.694013	1	0.852602	1	1	0.949482	-0.216045	-0.684356	-0.900401	-0.364771	-0.051923		-0.177305	-1.0065	0.0399795		1.32496	-1.13405	0.402732	-0.357283	-1.24341	0.375085
PAP	Zm00001d028368	PAP7c	3.90457e-07	8.84151e-05	0.727069		5.7319e-09	0.979524	1.42996e-09	5.73808e-05	0.658725		0.977677	1.26459e-07	0.00264826		0.985702	1	0.654192	1	0.635376	0.770788	-0.970514	-0.00949934	-0.980014	0.56516	-0.197867		-0.0226499	1.1927	0.714916		-0.0187791	-0.0759195	-0.20986	-0.177943	-0.755236	-0.342693
PAP	Zm00001d028367	PAP7d	2.28682e-10	1.14151e-12	0.734125		1.00116e-12	0.000467025	1.96561e-32	1.12507e-14	0.665452		0.565156	1.00301e-18	2.2154e-13		0.93464	1	0.167515	1	0.768096	0.595271	-1.68089	-0.960298	-2.64119	1.47811	-0.28082		0.313407	2.3802	2.05633		0.108736	-0.175113	-0.716863	0.0258578	-0.903359	-0.72563
PAP	Zm00001d033566	PAP7f	NA	NA	NA		NA	NA	NA	NA	NA		NA	NA	NA		NA	1	NA	1	1	NA	0.314689	-0.601374	-0.286685	-0.323559	0.584058		-0.495737	0.234645	-0.613847		0.869732	0.360067	0.22788	2.05211	-0.503176	0
PAP	Zm00001d016907	PAP7g	0.774027	NA	0.960317		NA	0.679452	NA	NA	NA		NA	NA	NA		NA	1	NA	1	1	0.681733	-0.0995128	0.675443	0.575931	-0.766538	0.361917		-1.04245	-1.10496	-0.0649313		-1.65487	-0.120824	0.614486	-0.0463089	1.73823	2.70156
PAP	Zm00001d043291	PAP10	5.60477e-09	1.23288e-12	0.688756		1.85786e-06	5.98703e-06	6.77515e-26	4.42741e-14	0.632216		0.726787	1.5337e-23	2.54532e-15		0.501316	1	0.161658	1	1	0.883903	-0.94729	-0.975485	-1.92278	1.17864	0.242332		0.172429	1.99973	1.65998		0.465789	0.000173975	0.527906	0.261641	0.0132044	0.181562
PAP	Zm00001d034839	PAP13	3.40652e-20	0.00248532	0.820282		4.63628e-13	0.0643543	4.31934e-24	0.00177266	0.767765		0.858153	6.54984e-06	0.0209369		0.709495	1	0.113698	1	1	0.889525	-1.41477	-0.47159	-1.88636	0.538994	0.190646		-0.141016	1.272	0.677805		0.40411	-0.159616	0.77819	0.46871	0.0373397	-0.22741
PAP	Zm00001d021299	PAP14	1.35196e-05	0.706574	0.999515		0.000590178	0.000125465	0.607657	0.703275	0.99645		0.977148	0.0663017	0.196206		0.849318	1	0.392929	1	1	0.970117	0.565279	-0.672973	-0.107694	-0.0704842	0.00661284		-0.0236002	-0.539911	0.336769		0.14475	0.072644	-0.300474	-0.0586123	-0.046226	-0.0519302
PAP	Zm00001d042142	PAP16	3.38482e-29	1.23559e-06	0.930398		4.67745e-11	6.54304e-16	2.35002e-58	5.15168e-07	0.893204		0.908482	2.47684e-05	4.28791e-08		0.97821	1	0.820385	1	1	0.779199	-1.25053	-1.61351	-2.86404	0.802673	-0.113555		0.0963042	1.13294	1.44226		0.0361812	-0.3349	-0.14277	0.431485	-0.307634	-0.397526
PAP	Zm00001d033056	PAP18	0.493685	0.269903	0.821115		0.336496	0.960296	0.358946	0.267132	0.76498		0.457788	0.98825	0.542948		0.730432	1	0.0550356	1	1	0.652217	-0.18372	0.0159759	-0.167744	-0.164059	-0.141288		-0.290184	0.0118832	-0.180176		-0.199018	-0.0797654	-0.489645	0.102871	-0.0987769	-0.315293
PAP	Zm00001d025343	PAP21a	1.37378e-05	0.305505	0.88861		1.3679e-06	0.27996	0.00116258	0.284442	0.843162		0.437373	0.00121359	0.524438		0.947356	1	0.980042	1	1	0.937855	-1.37763	0.433376	-0.944255	0.303791	-0.21321		-0.495574	1.43268	0.316354		-0.135841	-0.596226	0.0299123	-0.240809	-0.251095	0.218969
PAP	Zm00001d053145	PAP21b	0.329004	0.0312413	0.984529		0.164354	0.850009	0.270461	0.0292	0.975834		0.196202	0.954587	0.12277		0.982655	1	0.9633	1	1	0.785555	0.395144	-0.0835435	0.3116	-0.46383	0.0408756		-0.64013	-0.069873	-0.623022		-0.0431115	0.19512	-0.0478759	-0.188492	0.0156091	0.574817
PAP	Zm00001d023404	PAP21c	0.0419701	0.782858	0.824646		0.174702	0.0225798	0.35719	0.780417	0.775414		0.634633	0.605375	0.753142		0.854078	1	0.649916	1	1	0.604683	0.372148	-0.629071	-0.256923	-0.0767063	0.210605		-0.328338	0.350917	-0.152072		0.28328	0.0212883	0.359471	0.0973605	-0.160523	0.874085
PAP	Zm00001d023410	PAP21d	4.59402e-16	0.75475	0.88927		0.441663	7.72326e-12	7.41257e-18	0.746591	0.84714		0.580065	0.00388969	0.477011		0.872966	1	0.355576	1	1	0.52446	-0.248724	-1.7589	-2.00762	0.0946089	0.181302		-0.3497	1.11249	-0.317214		-0.227675	0.0592572	0.603894	0.320689	0.32969	1.00808
PAP	Zm00001d050026	PAP23	4.36327e-15	0.0588155	0.623785		7.76894e-08	0.0201014	3.08561e-18	0.0570254	0.552797		0.819015	0.138732	0.489696		0.777502	1	0.0884891	1	0.298886	0.818385	-0.85901	-0.456554	-1.31556	0.282362	-0.22262		0.152751	0.522316	0.222327		0.221814	-0.352882	-0.60596	-0.0594078	-0.89496	-0.258664
PAP	Zm00001d004075	PAP24a	0.000761798	0.675056	0.736907		0.000361106	0.0456241	0.316847	0.67157	0.68762		0.681069	0.600566	0.360894		0.916412	1	0.0814543	1	1	0.695499	0.893142	-0.599915	0.293226	-0.117882	0.267083		-0.322499	-0.375398	0.408282		-0.181769	0.115012	1.18855	0.0853862	0.190017	0.7462
PAP	Zm00001d031657	PAP24b	0.212093	0.0235032	0.846955		0.956783	0.279459	0.229273	0.0211511	0.79724		0.870378	0.00238704	0.698134		0.832598	1	0.242036	1	1	0.911902	0.020399	-0.312952	-0.292553	-0.424277	0.180081		-0.147845	-1.04364	-0.159587		-0.274592	0.441068	0.661084	0.397884	-0.108358	-0.2105
PAP	Zm00001d023227	PAP26	0.00021367	0.251262	1		0.000220485	0.0857086	0.153946	0.22123	0.998278		0.371837	0.256877	0.417782		0.754311	1	0.98407	1	1	1	2.36538	-1.33224	1.03314	-0.747232	0.0149748		-1.3682	-1.51183	0.91942		-1.15194	0.7636	-0.043509	-0.931332	0.67704	0.0324645
PAP	Zm00001d036490	PAP28a	0.238318	0.445267	0.869297		0.0954567	0.612711	0.36173	0.441633	0.819827		0.555386	0.390123	0.0929118		0.980782	1	0.327171	1	1	0.512144	-0.265623	0.112654	-0.152969	0.110384	-0.110235		-0.218051	0.285802	0.374915		-0.0195899	-0.0155994	-0.30082	0.0246404	-0.318048	-0.473624
PAP	Zm00001d047241	PAP28b	0.265745	0.49888	0.982834		0.972447	0.297975	0.186641	0.496287	0.973561		0.980115	0.647576	0.562387		0.842898	1	0.0698374	1	1	0.968202	-0.00868334	-0.198651	-0.207335	0.0981621	0.0255962		-0.0187969	0.193012	0.155186		0.0964757	-0.0521498	0.374572	-0.105541	0.107605	-0.0354966
PAP	Zm00001d023918	PAP30a	1.13636e-08	4.32252e-06	0.616266		0.0047004	2.14293e-05	2.58177e-16	2.34071e-06	0.561719		0.761786	0.0119684	3.77539e-07		0.901334	1	0.265264	1	1	0.898996	-0.566015	-0.874823	-1.44084	0.727734	0.255955		0.192439	0.799958	1.37008		0.142384	0.224839	0.541926	0.413093	0.369463	0.202864
PAP	Zm00001d039195	PAP30b	0.529081	NA	0.979769		NA	0.886983	NA	NA	NA		NA	NA	NA		NA	1	NA	1	1	0.967853	0.61356	0.268839	0.882399	-1.27542	0.223453		-0.0221986	-1.46061	-2.48692		2.28855	-0.120824	-0.994406	-0.0525365	-0.0576289	0.495834
P	Zm00001d019536	PHR1	0.268495	0.698395	0.923972		0.343473	0.105417	0.49138	0.697168	0.886556		0.959349	0.644306	0.849877		1	1	0.552751	1	1	0.596528	-0.164212	0.282349	0.118136	0.0611239	-0.0822583		-0.0378163	0.195364	0.0579722		0.00025913	-0.0135557	-0.181526	0.00216179	-0.183252	-0.371822
P	Zm00001d018465	PHR1	9.82487e-20	6.76488e-08	0.634227		0.0025016	0.0204007	3.56834e-10	3.60346e-08	0.563531		0.449692	0.000616381	6.62577e-06		0.784672	1	0.14928	1	1	0.784396	0.609538	0.523577	1.13312	-0.846247	-0.25796		-0.365233	-1.05251	-1.25669		-0.308273	-0.125244	-0.68772	-0.13946	-0.350704	-0.403772
P	Zm00001d003037	PHR2	0.0019825	0.43722	0.974781		0.727367	0.000545113	0.000978081	0.426708	0.957095		0.530614	0.861084	0.00340705		0.920349	1	0.852397	1	1	0.645231	0.114557	-0.847122	-0.732565	0.179919	-0.0643653		-0.34422	0.14051	0.942142		-0.147769	0.144721	0.15048	-0.0769902	0.419375	-0.716664
P	Zm00001d014701	PHR3	1.35535e-21	1.74701e-05	0.86165		1.86934e-11	0.110448	1.68187e-20	8.22414e-06	0.811547		0.98442	1.93837e-08	0.000152007		0.979587	1	0.307626	1	1	0.755104	-1.31841	-0.418866	-1.73727	0.742393	-0.167293		-0.0180384	1.45981	1.02615		-0.0373163	-0.020818	-0.536834	0.0645706	-0.340618	-0.466318
P	Zm00001d001936	PHR4	9.79173e-24	0.000385547	1		2.50281e-09	0.0276861	3.09026e-20	0.000269606	0.998414		0.941485	5.82775e-05	0.0156176		0.723192	1	0.996429	1	1	0.884186	1.21652	0.552224	1.76875	-0.632959	0.00457444		-0.0767395	-1.23565	-0.748006		-0.433129	0.555581	0.00437537	-0.0668847	-0.380251	-0.258898
P	Zm00001d038972	PHO2	5.35105e-13	0.945911	0.871337		0.527867	1.52893e-10	1.74465e-09	0.944754	0.820443		0.769565	0.84028	0.884819		0.992445	1	0.499852	1	1	0.603073	-0.162713	1.24101	1.07829	0.0175909	-0.150482		0.203401	-0.148527	-0.0636904		0.0140613	0.0392278	-0.416952	-0.0283752	-0.147047	-0.739695
