# Supplementary material for: Plant Age and Soil Texture Rather Than the Presence of Root Hairs Cause Differences in Maize Resource Allocation and Root Gene Expression in the Field
Source: Plants (Basel). 2022 Oct 28;11(21):2883. doi: 10.3390/plants11212883 (PMC9657941; doi:10.3390/plants11212883)
Supplement: Supplementary file 1 [file plants-11-02883-s001.zip › Table S5.xlsx]

## Sheet: Sheet1
Plant age and soil texture rather than the presence of root hairs cause differences in maize resource allocation and root gene expression in the field
Plant and Soil
Minh Ganther, Eva Lippold, Manuela Désirée Bienert, Marie-Lara Bouffaud, Mario Bauer, Louis Baumann, Gerd Patrick Bienert, Doris Vetterlein, Anna Heintz-Buschart, Mika Tapio Tarkka*
*Corresponding Author: mika.tarkka@ufz.de (Helmholtz-Institute for Environmental Research - UFZ, Halle, Germany)
Table S5. Differentially expressed genes by stage, substrate, and genotype
Differential expression was determined by the DESeq package (Wald test). Only genes with corrected p-value padj<0.05 are included in this file.
Contrasts describe the comparison of Conditon1 vs Condition2 (baseline).
LFC: log2 fold change

## Sheet: stage
BBCH19 vs BBCH14					BBCH59 vs BBCH19					BBCH 59 vs BBCH14
gene_id	LFC	padj	description		gene_id	LFC	padj	description		gene_id	LFC	padj	description
Zm00001d029388	-4.84482	1.76143e-17	Metacaspase-3		Zm00001d043651	5.10531	2.91025e-15	Tryptophan aminotransferase-related protein 4		Zm00001d007949	6.88719	5.7923e-47	Agamous-like MADS-box protein AGL8
Zm00001d034045	6.42834	1.76143e-17	Agamous-like MADS-box protein AGL8		Zm00001d004705	4.93416	8.01021e-12	Amino acid permease 2		Zm00001d034045	9.83353	1.27816e-44	Agamous-like MADS-box protein AGL8
Zm00001d022088	5.58784	2.52787e-16	Agamous-like MADS-box protein AGL8		Zm00001d007949	4.21798	8.01021e-12	Agamous-like MADS-box protein AGL8		Zm00001d047907	-7.59053	9.13115e-36	Putative homeodomain-like transcription factor superfamily protein
Zm00001d052136	2.83216	2.30186e-13	1-aminocyclopropane-1-carboxylate oxidase20		Zm00001d034891	-6.25189	1.15195e-11	RAD-like 3		Zm00001d022088	6.84741	7.13666e-26	Agamous-like MADS-box protein AGL8
Zm00001d048152	1.82934	1.02389e-11	Glycosyl hydrolase family 10 protein		Zm00001d047907	-5.45137	4.05161e-11	Putative homeodomain-like transcription factor superfamily protein		Zm00001d008939	5.64148	7.13666e-26	Protein FLOWERING LOCUS T
Zm00001d029141	-0.965252	1.23155e-11	E3 ubiquitin-protein ligase MIEL1		Zm00001d043206	-1.24701	9.0157e-11	Putative E3 ubiquitin-protein ligase RING1a		Zm00001d042142	-2.63584	2.40083e-24	Probable inactive purple acid phosphatase 16
Zm00001d027682	4.61338	5.38435e-11	WAT1-related protein		Zm00001d049362	0.527609	3.57959e-10	NA		Zm00001d031878	4.24412	5.1332e-24	Early nodulin 75 protein
Zm00001d021248	-1.00898	9.66334e-11	NC domain-containing protein-related		Zm00001d029388	4.50468	1.84891e-09	Metacaspase-3		Zm00001d037651	-4.07443	7.42874e-24	Subtilisin-like serine endopeptidase family protein
Zm00001d040786	1.86667	1.08841e-10	NA		Zm00001d037651	-3.31732	2.68118e-09	Subtilisin-like serine endopeptidase family protein		Zm00001d049362	0.594655	4.19691e-23	NA
Zm00001d040787	1.66262	1.47738e-10	Abscisic stress-ripening protein 1		Zm00001d014617	-4.08069	2.88158e-09	Xyloglucan endotransglucosylase/hydrolase protein 14		Zm00001d029135	6.19528	2.04012e-22	sugars will eventually be exported transporter12a
Zm00001d026190	-1.31982	1.9264e-10	DeSI-like protein		Zm00001d015226	1.40526	3.31142e-09	Myb family transcription factor PHL6		Zm00001d018801	-3.64366	2.04012e-22	NA
Zm00001d014958	-2.22212	6.40658e-10	cytochrome P450 family 87 subfamily A polypeptide 6		Zm00001d052243	4.66203	4.16736e-09	Putative laccase family protein		Zm00001d016588	-1.75535	8.28286e-22	Glycerophosphodiester phosphodiesterase GDPD2
Zm00001d011517	0.319462	1.85271e-09	Putative DUF1296 domain containing family protein		Zm00001d041082	2.93206	1.145e-08	kaurene synthase4		Zm00001d031877	10.4242	4.97762e-21	NA
Zm00001d004875	-1.49627	3.56247e-09	Two-component response regulator-like APRR9		Zm00001d014055	-4.51021	1.59777e-08	Protein ECERIFERUM 1		Zm00001d007718	-3.00896	7.00569e-21	benzoxazinone synthesis13
Zm00001d021634	-3.39858	4.55668e-09	Hsp20/alpha crystallin family protein		Zm00001d002479	3.42889	1.70742e-08	S-norcoclaurine synthase		Zm00001d012726	4.07952	1.17173e-20	NA
Zm00001d043515	-1.37034	6.63627e-09	IAA6-auxin-responsive Aux/IAA family member		Zm00001d037281	4.4494	1.70742e-08	NA		Zm00001d013259	10.7477	2.08943e-20	Zea mays MADS-box 15
Zm00001d013259	7.39342	1.10221e-08	Zea mays MADS-box 15		Zm00001d049428	3.14215	2.41761e-08	Germin-like protein subfamily 1 member 8		Zm00001d010958	-0.87789	9.26127e-20	DnaJ subfamily B member 13
Zm00001d051219	-0.662394	1.42132e-08	RNI-like superfamily protein		Zm00001d049435	3.47596	2.58264e-08	Germin-like protein subfamily 1 member 8		Zm00001d034047	6.65402	2.51343e-19	Zea mays MADS24
Zm00001d010958	-0.586012	1.54997e-08	DnaJ subfamily B member 13		Zm00001d024996	3.76033	3.77837e-08	Bowman-Birk type trypsin inhibitor		Zm00001d038020	-2.05292	5.13627e-19	Putative leucine-rich repeat transmembrane protein kinase family protein
Zm00001d003621	-0.751472	1.55611e-08	U-box domain-containing protein 33		Zm00001d047662	1.28203	4.2597e-08	NA		Zm00001d000012	4.03587	6.75933e-19	Germin-like protein subfamily 1 member 8
Zm00001d029135	4.07723	1.77943e-08	sugars will eventually be exported transporter12a		Zm00001d049421	3.72664	6.64613e-08	Germin-like protein subfamily 1 member 8		Zm00001d029141	-1.17179	2.00611e-18	E3 ubiquitin-protein ligase MIEL1
Zm00001d018801	-2.3184	1.77943e-08	NA		Zm00001d029776	-2.54175	6.98968e-08	Serine carboxypeptidase-like 34		Zm00001d043383	-4.03277	9.85199e-18	Rop guanine nucleotide exchange factor 9
Zm00001d030894	-1.29797	1.86435e-08	Cyclin-D5-1		Zm00001d012726	3.37658	7.45002e-08	NA		Zm00001d047345	1.71088	5.07904e-17	Expressed protein; protein
Zm00001d053139	-1.79794	1.86435e-08	NA		Zm00001d049423	4.17223	1.05867e-07	Germin-like protein subfamily 1 member 8		Zm00001d012090	-2.80684	7.42063e-17	NA
Zm00001d017324	0.634797	1.86435e-08	Replication protein A 32 kDa subunit A		Zm00001d015963	2.11862	1.07956e-07	Protein DETOXIFICATION 16		Zm00001d002739	-1.50595	1.51495e-16	Polyketide cyclase/dehydrase and lipid transport superfamily protein
Zm00001d030995	-3.09421	1.95652e-08	Basic leucine zipper 25		Zm00001d031077	4.56119	1.49451e-07	Cation/H(+) antiporter 19		Zm00001d008600	-2.95244	1.72777e-16	Sulfoquinovosyl transferase SQD2
Zm00001d042654	1.3702	1.95652e-08	Beta-galactosidase		Zm00001d030851	-2.19792	2.24748e-07	Cytochrome P450 CYP81N5		Zm00001d038089	-1.23239	3.15277e-16	Major facilitator superfamily protein
Zm00001d018238	-2.84922	2.12526e-08	Thioredoxin-like 3-1 chloroplastic		Zm00001d000012	3.36807	2.29424e-07	Germin-like protein subfamily 1 member 8		Zm00001d049020	-2.26848	5.25955e-16	O-methyltransferase ZRP4
Zm00001d029495	-1.22171	2.16833e-08	NA		ZeamMp057	1.87229	2.48114e-07	NA		Zm00001d006022	-2.06059	5.25955e-16	Transcription factor bHLH130
Zm00001d026952	-1.65296	2.54866e-08	NA		Zm00001d024960	4.59225	2.61138e-07	Bowman-Birk type trypsin inhibitor		Zm00001d040786	2.18649	5.93171e-16	NA
Zm00001d000843	-1.09879	2.97e-08	NA		Zm00001d025924	2.99661	3.40947e-07	(+)-neomenthol dehydrogenase		Zm00001d023617	8.03541	1.24048e-15	Laccase-7
Zm00001d036392	-2.50815	3.08806e-08	BZIP transcription factor TRAB1		Zm00001d037513	-5.18442	3.47951e-07	germin-like protein1		Zm00001d043651	3.86289	1.99808e-15	Tryptophan aminotransferase-related protein 4
Zm00001d036718	-0.992362	3.4405e-08	Phospholipase D Z		Zm00001d049303	-4.51228	6.22459e-07	O-methyltransferase ZRP4		Zm00001d034551	-2.41669	2.50473e-15	Polygalacturonase QRT2
Zm00001d011832	1.55324	3.57821e-08	G-type lectin S-receptor-like serine/threonine-protein kinase SD2-5		Zm00001d008205	4.68505	6.22459e-07	phytochrome interacting factor3		Zm00001d037513	-6.01751	2.50473e-15	germin-like protein1
Zm00001d032849	-1.85579	4.13152e-08	RING/U-box superfamily protein		Zm00001d012339	2.279	6.22459e-07	NA		Zm00001d041624	-2.64081	2.5216e-15	Mono-/di-acylglycerol lipase N-terminal;Lipase class 3
Zm00001d022192	2.53908	4.1632e-08	trehalose-6-phosphate phosphatase9		Zm00001d045138	-1.75004	6.22459e-07	Heparanase-like protein 3		Zm00001d046834	-4.32204	3.50035e-15	Low temperature and salt responsive protein
Zm00001d050649	-4.76703	5.29171e-08	ZCN2		Zm00001d043383	-3.14525	6.40565e-07	Rop guanine nucleotide exchange factor 9		Zm00001d012069	-2.06554	4.29993e-15	DUF506 family protein
Zm00001d027425	1.0247	5.72138e-08	agamous-like6		Zm00001d040014	-2.2104	7.33013e-07	Nuclease PA3		Zm00001d051219	-0.847674	4.5143e-15	RNI-like superfamily protein
Zm00001d007445	-3.4683	6.32817e-08	Adagio protein 3		Zm00001d037160	2.59984	7.33013e-07	Nodulin protein		Zm00001d007296	-0.711187	6.89008e-15	Vacuolar protein sorting-associated protein 26A
Zm00001d031264	2.40032	6.97721e-08	Cupin: RmlC-type		Zm00001d022072	-1.88923	8.14794e-07	Protein LONGIFOLIA 2		Zm00001d027537	-2.72922	8.03254e-15	Cytochrome P450 CYP78A55
Zm00001d020339	1.2774	7.9077e-08	glycosyl hydrolase family 81 protein		Zm00001d011237	4.36264	8.14794e-07	Putative WRKY DNA-binding domain superfamily protein		Zm00001d005742	-4.74392	8.04639e-15	NA
Zm00001d006354	1.85577	8.77627e-08	F22G5.33		Zm00001d008939	3.60731	9.35736e-07	Protein FLOWERING LOCUS T		Zm00001d019555	-1.65607	8.30339e-15	Two-component response regulator ARR3
Zm00001d037057	3.59954	8.80249e-08	Transmembrane amino acid transporter family protein		Zm00001d015914	2.96103	1.08757e-06	sugars will eventually be exported transporter4b		Zm00001d049435	3.37716	8.7595e-15	Germin-like protein subfamily 1 member 8
Zm00001d051896	-1.30167	8.997e-08	Protein DOWNY MILDEW RESISTANCE 6		Zm00001d045295	2.31827	1.08757e-06	ACS-like protein/ Putative AMP-dependent synthetase and ligase superfamily protein		Zm00001d053626	-2.1201	9.80973e-15	SPX domain-containing protein 1
Zm00001d035195	-2.53157	1.12362e-07	Protein LSD1		Zm00001d044662	3.58008	1.19991e-06	ZHD9 ZF-HD type transcription factor		Zm00001d005767	-1.52388	1.00146e-14	DNA glycosylase superfamily protein
Zm00001d025822	-0.674831	1.12362e-07	OSJNBa0043L24.15 protein; protein		Zm00001d027537	-2.41774	1.22874e-06	Cytochrome P450 CYP78A55		Zm00001d023516	-5.18595	1.00688e-14	Salt stress-induced protein
Zm00001d013781	-2.03789	1.20086e-07	Chloroplast post-illumination chlorophyll fluorescence increase protein		Zm00001d037005	3.5759	1.24423e-06	Putative FAD-binding Berberine family protein		Zm00001d049423	3.91501	1.81381e-14	Germin-like protein subfamily 1 member 8
Zm00001d030282	0.631252	1.50254e-07	Probable alpha-mannosidase		Zm00001d031724	4.64549	1.63022e-06	ABC transporter G family member 34		Zm00001d014628	3.20251	2.1224e-14	Homeobox-leucine zipper protein HAT9
Zm00001d041735	3.8155	1.50254e-07	Expressed protein; protein		Zm00001d002776	3.5519	1.63022e-06	Probable receptor-like protein kinase		Zm00001d033047	-3.86022	2.50083e-14	SPX domain-containing protein 3
Zm00001d027461	1.10534	1.68247e-07	DNA binding protein		Zm00001d012069	-1.77706	1.63022e-06	DUF506 family protein		Zm00001d025924	3.13982	2.50083e-14	(+)-neomenthol dehydrogenase
Zm00001d006881	-2.41314	1.68247e-07	NA		Zm00001d046496	2.33497	1.63022e-06	NA		Zm00001d054015	-2.31196	3.749e-14	Peptidyl-prolyl cis-trans isomerase FKBP18 chloroplastic
Zm00001d013719	5.76209	1.68247e-07	cytochrome P450 family 87 subfamily A polypeptide 2		Zm00001d049437	2.87507	1.87249e-06	Germin-like protein subfamily 1 member 8		Zm00001d036718	-1.26377	4.03762e-14	Phospholipase D Z
Zm00001d016588	-1.06545	1.68247e-07	Glycerophosphodiester phosphodiesterase GDPD2		Zm00001d002698	3.95908	2.02445e-06	Subtilisin-like protease SBT1.9		Zm00001d039880	2.71584	4.39338e-14	Lecithin-cholesterol acyltransferase-like 1
Zm00001d037279	0.306708	1.68247e-07	Dynamin-2A		Zm00001d049096	2.76603	2.15047e-06	NA		Zm00001d037281	4.2452	6.06715e-14	NA
Zm00001d039066	-1.25116	1.68247e-07	Galactose mutarotase-like superfamily protein		Zm00001d039355	1.28716	2.34588e-06	Histone-lysine N-methyltransferase ATX4		Zm00001d042353	3.72939	6.08882e-14	sucrose phosphate synthase2
Zm00001d019568	0.401415	1.68317e-07	phosphoglucosamine mutase family protein		Zm00001d047674	-1.56667	2.52381e-06	Cell-linked locus protein/ Long cell-linked locus protein		Zm00001d042315	1.15892	6.22544e-14	MADS-box transcription factor 56
Zm00001d041972	-1.57262	1.95207e-07	Cellulose synthase-like protein G3		Zm00001d048152	-1.7356	2.56085e-06	Glycosyl hydrolase family 10 protein		Zm00001d012153	-1.2449	6.22544e-14	CMP-sialic acid transporter 3
Zm00001d034839	-1.61757	1.95401e-07	Purple acid phosphatase 15		Zm00001d022474	-2.20701	2.60905e-06	Copper chaperone		Zm00001d022561	-1.83991	6.35706e-14	Negatively light-regulated protein
Zm00001d006454	1.59317	2.30123e-07	Filament-like plant protein 3		Zm00001d034107	3.28002	2.65876e-06	cytochrome P450 family 81 subfamily D polypeptide 8		Zm00001d035309	-1.24985	6.83347e-14	NA
Zm00001d034584	3.12904	2.53135e-07	isopentenyl transferase6		Zm00001d052939	-3.03814	2.65876e-06	OSJNBb0045P24.5 protein		Zm00001d038867	-3.35554	8.62085e-14	NA
Zm00001d002788	-1.17266	2.53135e-07	Cyclin-U4-2		Zm00001d035561	-5.09601	3.23308e-06	Expressed protein; Mannose-specific jacalin-related lectin; protein		Zm00001d052243	4.28056	9.76905e-14	Putative laccase family protein
Zm00001d020693	0.796998	2.53941e-07	uncharacterized protein		Zm00001d030548	1.66519	3.36046e-06	2-oxoglutarate (2OG) and Fe(II)-dependent oxygenase superfamily protein		Zm00001d023411	-1.5532	1.3157e-13	myb-like transcription factor family protein
Zm00001d012764	2.96855	2.63348e-07	malic enzyme4		Zm00001d012090	-2.24531	3.36046e-06	NA		Zm00001d037115	-1.33464	1.34115e-13	Choline/ethanolaminephosphotransferase 1
Zm00001d027824	2.32295	2.80351e-07	NA		Zm00001d048281	4.39261	3.3894e-06	Protein LURP-one-related 6		Zm00001d000843	-1.38916	1.40162e-13	NA
Zm00001d023815	-0.977069	3.19317e-07	Putative lipase class 3 family protein		Zm00001d049073	2.35756	4.2888e-06	NifS-like protein		Zm00001d008983	3.36519	1.40162e-13	P-loop containing nucleoside triphosphate hydrolases superfamily protein
Zm00001d044757	0.486304	3.27439e-07	Dynamin-2A		Zm00001d014121	4.25807	4.29702e-06	Ent-cassadiene C2-hydroxylase		Zm00001d023815	-1.30818	1.63099e-13	Putative lipase class 3 family protein
Zm00001d052218	0.647796	3.38601e-07	Inactive exonuclease DIS3L2		Zm00001d035409	4.38232	4.74267e-06	Abscisic stress-ripening protein 2		Zm00001d027022	-3.99276	2.40767e-13	NA
Zm00001d034047	4.22218	3.83136e-07	Zea mays MADS24		Zm00001d048705	-2.46061	5.71286e-06	benzoxazinone synthesis5		Zm00001d025859	1.65473	2.51911e-13	MazG nucleotide pyrophosphohydrolase domain protein
Zm00001d016746	2.91439	3.91706e-07	Transducin/WD40 repeat-like superfamily protein		Zm00001d048702	-2.78674	6.28407e-06	benzoxazinone synthesis3		Zm00001d021804	2.44716	2.71188e-13	Internal alternative NAD(P)H-ubiquinone oxidoreductase A1 mitochondrial
Zm00001d041624	-1.83592	4.07658e-07	Mono-/di-acylglycerol lipase N-terminal;Lipase class 3		Zm00001d015964	1.78406	6.28407e-06	Protein DETOXIFICATION 16		Zm00001d015964	1.99365	2.73229e-13	Protein DETOXIFICATION 16
Zm00001d038352	-3.36744	4.07658e-07	NA		Zm00001d029383	2.01508	6.7624e-06	WAT1-related protein		Zm00001d022493	-2.35695	4.08172e-13	alpha/beta-Hydrolases superfamily protein
Zm00001d048487	-2.10106	4.12248e-07	NA		Zm00001d033098	2.08905	6.7624e-06	post-illumination chlorophyll fluorescence increase		Zm00001d015201	-1.74914	5.1537e-13	Protein NLP6
Zm00001d014291	-2.11048	4.42923e-07	Probable protein phosphatase 2C 71		Zm00001d042244	3.58767	7.22916e-06	Potasium ion uptake permease 1		Zm00001d011799	5.47068	5.51144e-13	Nuclear transport factor 2 (NTF2) family protein
Zm00001d043146	-0.88425	5.13207e-07	ribonuclease III domain protein1		Zm00001d029702	2.76088	7.23704e-06	Glutathione S-transferase U16		Zm00001d021248	-1.06017	7.07107e-13	NC domain-containing protein-related
Zm00001d009452	0.66293	6.40013e-07	Putative clathrin assembly protein		Zm00001d044167	-1.88571	7.28553e-06	Ovate protein		ZeamMp057	1.80723	8.34769e-13	NA
Zm00001d028620	0.990297	6.74718e-07	Putative clathrin assembly protein		Zm00001d029681	1.63933	7.40853e-06	peptidoglycan-binding LysM domain-containing protein		Zm00001d035682	-3.12336	9.02983e-13	Alpha-humulene/(-)-(E)-beta-caryophyllene synthase
Zm00001d039606	-1.20647	7.37723e-07	Serinc-domain containing serine and sphingolipid biosynthesis protein		Zm00001d033529	-1.07256	9.49958e-06	5'-AMP-activated protein kinase-related		Zm00001d048985	-2.04584	1.02611e-12	Expressed protein; protein
Zm00001d006913	2.73527	7.38936e-07	trehalose-6-phosphate phosphatase3		Zm00001d015201	-1.52726	1.08983e-05	Protein NLP6		Zm00001d040842	-2.51171	1.33616e-12	12-oxo-phytodienoic acid reductase6
Zm00001d042005	-1.43672	7.47572e-07	Amino acid kinase family protein		Zm00001d045128	0.525727	1.29877e-05	Probable protein phosphatase 2C 22		Zm00001d031724	4.62568	1.33761e-12	ABC transporter G family member 34
Zm00001d051901	1.347	1.00248e-06	P-loop NTPase domain-containing protein LPA1 homolog 1		Zm00001d047719	-1.37034	1.33414e-05	Protein kinase superfamily protein		Zm00001d004243	-5.8816	1.6975e-12	Peptidyl-prolyl cis-trans isomerase FKBP65
Zm00001d039776	0.42017	1.00851e-06	PLAC8 family protein		Zm00001d023769	2.79871	1.39875e-05	Delta(12)-fatty-acid desaturase		Zm00001d030532	-1.68427	2.16346e-12	Homeobox-leucine zipper protein ATHB-6
Zm00001d033558	0.634786	1.04389e-06	Tetratricopeptide repeat (TPR)-like superfamily protein		Zm00001d023779	2.30859	1.51742e-05	3-hydroxyisobutyryl-CoA hydrolase 1		Zm00001d013702	-1.40117	2.18358e-12	nucleosome/chromatin assembly factor C
Zm00001d027672	-0.625098	1.20059e-06	Peptidase S24/S26A/S26B/S26C family protein		Zm00001d049174	-2.68963	1.55242e-05	lazy plant1		Zm00001d026223	-2.0601	2.28957e-12	Hydrogen peroxide-induced 1
Zm00001d031044	3.57848	1.23521e-06	Transcription factor PIF4		Zm00001d008405	0.700252	1.74358e-05	Iron-sulfur assembly protein IscA-like 1 mitochondrial		Zm00001d008268	0.844018	2.32377e-12	cystatin4
Zm00001d007783	-1.2184	1.31501e-06	P-loop containing nucleoside triphosphate hydrolases superfamily protein		Zm00001d010218	1.85582	1.75642e-05	Peroxidase 53		Zm00001d028045	-1.54845	2.66455e-12	Mannose-1-phosphate guanylyltransferase 1
Zm00001d043145	-0.893031	1.31501e-06	Cupin: RmlC-type		Zm00001d018748	-2.32757	1.79624e-05	Ustilago maydis induced11		Zm00001d024996	3.4557	2.72476e-12	Bowman-Birk type trypsin inhibitor
Zm00001d036443	-0.407275	1.31501e-06	Protein RER1B		Zm00001d012322	2.52978	1.80604e-05	cytochrome P450 family 81 subfamily D polypeptide 8		Zm00001d048690	2.60479	2.7348e-12	Serine carboxypeptidase-like 50
Zm00001d015297	-0.759538	1.47748e-06	protein; Ternary complex factor MIP1-like		Zm00001d028922	1.63586	1.81742e-05	NA		Zm00001d049421	3.42824	2.76857e-12	Germin-like protein subfamily 1 member 8
Zm00001d031329	-1.27534	1.53609e-06	Catalytic/ protein phosphatase type 2C		Zm00001d011183	6.26339	1.81742e-05	thiamine biosynthesis1		Zm00001d005097	1.41528	3.68784e-12	NA
Zm00001d006159	-1.78265	1.70061e-06	Ycf49-like protein		Zm00001d012088	2.12244	1.96931e-05	NA		Zm00001d047681	-1.59697	3.84207e-12	Pentatricopeptide repeat-containing protein
Zm00001d049625	-2.93451	1.82978e-06	Protein LSD1		Zm00001d040248	4.01964	2.22218e-05	Laccase-7		Zm00001d000018	2.57118	3.92873e-12	Germin-like protein subfamily 1 member 8
Zm00001d041645	-2.53893	1.82978e-06	NA		Zm00001d028693	2.15618	2.42897e-05	safener induced1		Zm00001d033836	1.461	4.43832e-12	Sec14p-like phosphatidylinositol transfer family protein
Zm00001d043180	-1.26147	1.82978e-06	EID1-like F-box protein 3		Zm00001d030542	2.44649	2.48172e-05	hydroxycinnamoyltransferase4		Zm00001d011125	0.958014	4.56398e-12	Putative USP family protein
Zm00001d012153	-0.869468	1.85946e-06	CMP-sialic acid transporter 3		Zm00001d021360	1.42556	2.6734e-05	CDGSH iron-sulfur domain-containing protein NEET		Zm00001d049428	2.79701	4.86451e-12	Germin-like protein subfamily 1 member 8
Zm00001d015265	0.561049	1.87574e-06	Pathogenesis-related homeodomain protein		Zm00001d004483	4.02674	2.77319e-05	Protein SRC2 homolog		Zm00001d034107	3.39216	4.89747e-12	cytochrome P450 family 81 subfamily D polypeptide 8
Zm00001d021764	-0.804378	1.87574e-06	Protein THYLAKOID FORMATION 1 chloroplastic		Zm00001d012333	5.04894	2.77319e-05	HXXXD-type acyl-transferase family protein		Zm00001d008205	3.2783	5.48697e-12	phytochrome interacting factor3
Zm00001d047174	0.525804	1.87574e-06	Polypyrimidine tract-binding protein homolog 1		Zm00001d005612	-0.967105	3.04667e-05	Ras-related protein RABA6a		Zm00001d027682	4.58351	5.62384e-12	WAT1-related protein
Zm00001d049303	3.3389	1.9765e-06	O-methyltransferase ZRP4		Zm00001d013870	1.97919	3.32476e-05	NA		Zm00001d026448	-2.15167	5.70325e-12	Floral homeotic protein APETALA 2
Zm00001d025977	-1.34341	1.9765e-06	Metal-nicotianamine transporter YSL2		Zm00001d037298	2.34607	3.36776e-05	UDP-glycosyltransferase 84A1		Zm00001d030548	1.73454	6.68746e-12	2-oxoglutarate (2OG) and Fe(II)-dependent oxygenase superfamily protein
Zm00001d002787	-0.397989	2.03546e-06	SET domain-containing protein SET104		Zm00001d028419	2.23486	3.59466e-05	cytochrome P450 family 76 subfamily C polypeptide 7		Zm00001d035053	2.11069	7.46796e-12	Putative MADS-box transcription factor family protein
Zm00001d033079	2.70831	2.09959e-06	GDSL esterase/lipase		Zm00001d033067	5.7521	3.64544e-05	Potassium transporter 5		Zm00001d003712	-2.27584	8.54834e-12	abscisic acid stress ripening3
Zm00001d005772	0.794141	2.12228e-06	NA		Zm00001d014629	3.38293	4.54991e-05	Homeobox-leucine zipper protein HAT9		Zm00001d036788	1.73149	9.20755e-12	Subtilisin-like protease SBT4.4
Zm00001d001043	2.69348	2.23891e-06	NA		Zm00001d006094	5.56144	5.0173e-05	Zea mays MADS27		Zm00001d003935	-0.686143	9.576e-12	NA
Zm00001d000556	-3.33353	2.25105e-06	NA		Zm00001d007753	2.93694	5.0405e-05	Eukaryotic aspartyl protease family protein		Zm00001d045138	-1.73581	9.576e-12	Heparanase-like protein 3
Zm00001d053189	-1.00038	2.34235e-06	Probable mediator of RNA polymerase II transcription subunit 26c		Zm00001d014628	2.52968	5.15025e-05	Homeobox-leucine zipper protein HAT9		Zm00001d002698	3.88885	9.9888e-12	Subtilisin-like protease SBT1.9
Zm00001d032337	-0.531874	2.56531e-06	Thioredoxin-like protein CITRX chloroplastic		Zm00001d015361	-1.3772	5.46584e-05	Transducin/WD40 repeat-like superfamily protein		Zm00001d011517	0.338503	1.07489e-11	Putative DUF1296 domain containing family protein
Zm00001d051674	0.658294	2.56531e-06	Phosphatidylinositol/phosphatidylcholine transfer protein SFH13		Zm00001d008808	1.89967	5.89692e-05	Putative MYB DNA-binding domain superfamily protein		Zm00001d034891	-4.86938	1.44421e-11	RAD-like 3
Zm00001d022561	-1.26088	2.56531e-06	Negatively light-regulated protein		Zm00001d032229	-1.04334	5.89768e-05	Regulator of chromosome condensation (RCC1) family protein		Zm00001d010459	-2.81554	1.58699e-11	Putative CBL-interacting protein kinase family protein
Zm00001d044622	-0.850281	2.76406e-06	F-box/LRR-repeat protein 3		Zm00001d039098	3.34051	5.89768e-05	NA		Zm00001d025099	3.57445	1.58699e-11	FPF1-like protein 1
Zm00001d013568	-1.67113	3.12357e-06	Glycine-rich RNA-binding: abscisic acid-inducible protein		Zm00001d025099	3.15806	5.89768e-05	FPF1-like protein 1		Zm00001d043291	-1.9299	1.58887e-11	Purple acid phosphatase 10
Zm00001d019976	-2.55399	3.22863e-06	phosphoglucosamine mutase family protein		Zm00001d033284	-1.67286	6.02116e-05	WAT1-related protein		Zm00001d035300	-3.12416	1.75535e-11	Heptahelical transmembrane protein 5
Zm00001d043851	1.19545	3.44164e-06	Long chain acyl-CoA synthetase 5		Zm00001d028512	-1.50479	6.16659e-05	Phosphatidylinositol 4-phosphate 5-kinase 2		Zm00001d000017	2.4271	1.76199e-11	Germin-like protein
Zm00001d044008	1.14167	3.44164e-06	Myosin heavy chain-like; protein		Zm00001d029768	-1.36022	6.16659e-05	barley mlo defense gene homolog2		Zm00001d046363	2.04609	1.88348e-11	S-adenosyl-L-methionine-dependent methyltransferases superfamily protein
Zm00001d006446	2.09399	3.50627e-06	salmon silk2		Zm00001d018525	-0.945648	6.20073e-05	Plant intracellular Ras-group-related LRR protein 9		Zm00001d038724	-1.08453	1.96928e-11	Cyclic phosphodiesterase
Zm00001d030034	-0.634485	3.54998e-06	glucose-inhibited division family A protein		Zm00001d032956	-0.402998	6.30569e-05	Acylamino-acid-releasing enzyme		Zm00001d043286	-1.94637	2.03137e-11	Phosphoglycerate mutase-like family protein
Zm00001d042315	0.803423	3.54998e-06	MADS-box transcription factor 56		Zm00001d016542	-1.3054	6.31178e-05	FAD/NAD(P)-binding oxidoreductase		Zm00001d036215	-0.607266	2.1736e-11	MAP kinase7
Zm00001d028280	-1.04438	3.60944e-06	Wall-associated receptor kinase-like 14		Zm00001d034986	3.60585	6.38131e-05	Cytochrome P450 71A26		Zm00001d029776	-2.28069	2.4463e-11	Serine carboxypeptidase-like 34
Zm00001d037771	-0.723415	3.60944e-06	Transcription factor bHLH133		Zm00001d018681	2.82597	6.40331e-05	NA		Zm00001d021336	-1.43255	2.4463e-11	Serine/threonine-protein kinase STY17
Zm00001d043206	0.675513	3.87182e-06	Putative E3 ubiquitin-protein ligase RING1a		Zm00001d026268	-2.68957	6.90269e-05	Transferase		Zm00001d031653	-1.9595	2.77741e-11	Glycerophosphodiester phosphodiesterase GDPD2
Zm00001d006041	0.495582	3.89633e-06	Proton pump-interactor 1		Zm00001d008635	2.44957	7.44449e-05	Probable carboxylesterase 15		Zm00001d004483	4.21126	2.88016e-11	Protein SRC2 homolog
Zm00001d048444	1.62572	3.98592e-06	Protein SULFUR DEFICIENCY-INDUCED 1		Zm00001d019446	-2.95452	7.93572e-05	farnesylated protein 3		Zm00001d049437	2.83572	2.89593e-11	Germin-like protein subfamily 1 member 8
Zm00001d023838	0.540111	3.98592e-06	Auxilin-related protein 1		Zm00001d007403	3.64328	8.06832e-05	Chalcone synthase WHP1		Zm00001d023402	-1.89648	2.89593e-11	Putative MYB DNA-binding domain superfamily protein
Zm00001d028922	-1.39977	4.02037e-06	NA		Zm00001d025690	0.649041	8.10958e-05	Isocitrate dehydrogenase		Zm00001d009399	-3.69953	3.52749e-11	Protein NRT1/ PTR FAMILY 6.2
Zm00001d015914	-2.20222	4.02037e-06	sugars will eventually be exported transporter4b		Zm00001d021320	1.95439	8.2631e-05	Sialyltransferase-like protein 1		Zm00001d046322	-1.34363	3.56659e-11	Putative FAD-binding Berberine family protein
Zm00001d053753	-0.871314	4.30318e-06	calmodulin binding protein2		Zm00001d035377	4.68927	8.32086e-05	IQ domain-containing protein IQM3		Zm00001d018653	-0.719437	3.91304e-11	Hydrolase/ protein serine/threonine phosphatase
Zm00001d012706	-0.996642	4.33507e-06	Acetamidase/Formamidase family protein		Zm00001d038806	-3.51284	8.50406e-05	Chaperone protein ClpB1		Zm00001d012142	-1.67051	3.91304e-11	Acid phosphatase/vanadium-dependent haloperoxidase-related protein
Zm00001d018699	-0.997366	4.35556e-06	NA		Zm00001d016934	2.55587	8.98915e-05	Galactose mutarotase-like superfamily protein		Zm00001d032209	-1.51102	4.10981e-11	NA
Zm00001d044136	3.83779	4.48627e-06	Glycerol-3-phosphate acyltransferase 1		Zm00001d022143	-1.27882	9.02273e-05	NA		zma-MIR399b	-5.54889	4.1538e-11	NA
Zm00001d010821	0.821634	4.51705e-06	starch synthase4		Zm00001d029940	1.28205	9.03013e-05	Ethylene-responsive transcription factor ERF105		ENSRNA049997242	-5.54889	4.1538e-11	NA
Zm00001d038191	-1.28184	4.6637e-06	Homeodomain-like superfamily protein		Zm00001d049419	2.37753	9.0827e-05	Germin-like protein subfamily 1 member 8		Zm00001d031264	2.70414	4.29689e-11	Cupin: RmlC-type
Zm00001d006397	-2.59309	4.70469e-06	UDP-glycosyltransferase 85A7		Zm00001d051689	-2.33778	9.24641e-05	Putative IQ calmodulin-binding and BAG domain containing family protein		Zm00001d048705	-2.51958	4.34237e-11	benzoxazinone synthesis5
Zm00001d033669	0.305153	4.96014e-06	Oxysterol-binding protein-related protein 1C		Zm00001d008619	0.504978	9.24641e-05	triose phosphate isomerase3		Zm00001d047662	1.11105	4.4862e-11	NA
Zm00001d052059	-1.45946	5.11568e-06	Putative RING zinc finger domain superfamily protein		Zm00001d036788	1.47807	9.44674e-05	Subtilisin-like protease SBT4.4		Zm00001d031428	-3.39984	5.11456e-11	Monogalactosyldiacylglycerol synthase 2 chloroplastic
Zm00001d003083	0.427512	5.11568e-06	Isocitrate dehydrogenase		Zm00001d043839	2.237	9.63621e-05	NA		Zm00001d025724	-2.05562	7.08482e-11	Acid phosphatase/vanadium-dependent haloperoxidase protein
Zm00001d005550	-0.991901	5.11568e-06	Phosphatidylinositol N-acetylglucosaminyltransferase GPI19/PIG-P subunit		Zm00001d021291	1.8945	9.63621e-05	Two-component response regulator-like APRR9		Zm00001d010218	1.95371	7.1886e-11	Peroxidase 53
Zm00001d052123	-2.14174	5.44405e-06	Thioredoxin-like 5		Zm00001d032961	-1.76413	9.67315e-05	anther ear1		Zm00001d038012	-0.770291	7.84445e-11	DUF538 family protein
Zm00001d004088	-0.565914	5.601e-06	NA		Zm00001d002816	2.47525	9.92178e-05	Lactoylglutathione lyase / glyoxalase I family protein		Zm00001d004687	4.54773	8.72348e-11	O-methyltransferase ZRP4
Zm00001d038830	-0.868951	5.601e-06	Putative inositol polyphosphate phosphatase (Synaptogenin-like) family protein		Zm00001d012176	-1.54167	0.000108189	Beta-hexosaminidase 3		Zm00001d026156	-2.20716	8.72348e-11	Putative glycerol-3-phosphate transporter 1
Zm00001d025707	0.736746	5.601e-06	BTB/POZ and TAZ domain-containing protein 2		Zm00001d016806	1.29291	0.000117978	UDP-glucuronate:xylan alpha-glucuronosyltransferase 1		Zm00001d049479	0.59571	1.01776e-10	Regulator of Vps4 activity in the MVB pathway protein
Zm00001d045191	-1.2183	5.97187e-06	Probable receptor-like protein kinase		Zm00001d028718	3.49785	0.000118399	Hydrophobic protein RCI2B		Zm00001d004559	1.02116	1.03376e-10	Leucine-rich repeat protein kinase family protein
Zm00001d013678	-0.775993	6.00358e-06	NA		Zm00001d011164	1.60894	0.000118399	NA		Zm00001d044136	4.92249	1.03479e-10	Glycerol-3-phosphate acyltransferase 1
Zm00001d018653	-0.538924	6.18382e-06	Hydrolase/ protein serine/threonine phosphatase		Zm00001d054060	3.35987	0.000118777	nitrate transport1		Zm00001d000610	-2.52971	1.08095e-10	NA
Zm00001d046836	1.02605	6.22496e-06	Sas10/Utp3/C1D family		Zm00001d040842	-1.98847	0.000118777	12-oxo-phytodienoic acid reductase6		Zm00001d015226	1.07301	1.08095e-10	Myb family transcription factor PHL6
Zm00001d017553	-1.18723	6.52276e-06	BZIP transcription factor		Zm00001d014600	2.95874	0.000118777	uncharacterized protein		Zm00001d025644	0.602035	1.13768e-10	Agmatine deiminase
Zm00001d047399	-1.80477	6.9761e-06	PLASMODESMATA CALLOSE-BINDING PROTEIN 5		Zm00001d038146	1.3422	0.000118777	Oxidoreductase: 2OG-Fe oxygenase family protein		Zm00001d026635	1.68796	1.2046e-10	Allantoinase
Zm00001d050428	0.910815	7.31484e-06	glyceraldehyde-3-phosphate deHaseN1		Zm00001d023995	2.50866	0.000118777	Sec14p-like phosphatidylinositol transfer family protein		Zm00001d039183	1.11725	1.34199e-10	Protein HYPER-SENSITIVITY-RELATED 4
Zm00001d006451	1.42694	7.31484e-06	Squamosa promoter-binding-like protein 5		Zm00001d038049	3.29533	0.000119821	Lichenase-2/ Putative O-Glycosyl hydrolase superfamily protein		Zm00001d028367	-2.264	1.42975e-10	Purple acid phosphatase 3
Zm00001d044930	1.31124	7.31484e-06	EF hand family protein		Zm00001d006069	3.16959	0.000125174	Putative quinone-oxidoreductase homolog chloroplastic		Zm00001d049174	-2.83417	1.49839e-10	lazy plant1
Zm00001d028371	-1.05565	7.72079e-06	Zinc finger protein 1		Zm00001d044652	-2.51859	0.000125174	nucleotide sugar transporter-KT 1		Zm00001d041735	4.29298	1.70958e-10	Expressed protein; protein
Zm00001d032808	-0.906789	7.7977e-06	NA		Zm00001d036703	3.78182	0.000130512	Protein GLUTAMINE DUMPER 5		Zm00001d014121	4.16104	1.7141e-10	Ent-cassadiene C2-hydroxylase
Zm00001d003593	-1.01728	7.89797e-06	Expressed protein; protein		Zm00001d017095	1.90872	0.000133893	High affinity nitrate transporter		Zm00001d008846	0.774275	1.7141e-10	Glutaminyl-tRNA synthetase
Zm00001d001834	0.41841	8.11534e-06	NA		Zm00001d047275	-1.4534	0.000135283	PLC-like phosphodiesterases superfamily protein		Zm00001d001936	1.90429	1.96407e-10	Myb family transcription factor PHL5
Zm00001d016651	-1.8145	8.13566e-06	NA		Zm00001d050893	1.37865	0.000141567	NAC domain-containing protein 79		Zm00001d034834	-0.798598	2.37932e-10	Serine/threonine-protein kinase MHK
Zm00001d035230	-1.13303	8.13566e-06	protein; Tyrosine specific protein phosphatase-like		Zm00001d044124	2.51952	0.000141881	polypeptide		Zm00001d002700	-2.38121	2.37932e-10	NA
Zm00001d050357	-0.507977	8.2386e-06	THO complex subunit 4C		Zm00001d038841	2.19129	0.000143512	putative aldehyde dehydrogenase MIS1		Zm00001d033747	2.0884	2.48055e-10	Glutamine synthetase root isozyme 2
Zm00001d039304	0.856363	8.26526e-06	Thioesterase family protein		Zm00001d036879	0.707488	0.000148345	Putative CBL-interacting protein kinase family protein		Zm00001d040787	1.56444	2.57465e-10	Abscisic stress-ripening protein 1
Zm00001d027278	0.385488	8.39376e-06	transcription regulators		Zm00001d039408	1.52388	0.000149019	Enoyl-CoA delta isomerase 2 peroxisomal		Zm00001d000609	-2.49583	2.6867e-10	NA
Zm00001d021895	2.17423	8.39376e-06	Beta-hexosaminidase		Zm00001d044106	1.59274	0.000149019	UDP-glycosyltransferase 73B3		Zm00001d009196	1.18065	2.6867e-10	NA
Zm00001d028413	-1.55601	8.54122e-06	LOB domain-containing protein 31		Zm00001d007718	-1.84287	0.000158316	benzoxazinone synthesis13		Zm00001d039936	-5.41569	3.24267e-10	17.4 kDa class I heat shock protein
Zm00001d005577	3.27593	8.54122e-06	Cytochrome P450 84A1		Zm00001d019243	-4.01967	0.000158316	NA		Zm00001d031449	2.70282	3.27761e-10	Lipoxygenase 2 chloroplastic
Zm00001d045611	-0.817521	8.54122e-06	Protein MEI2-like 5		Zm00001d006761	-0.639313	0.000164157	EID1-like F-box protein 2		Zm00001d043283	-1.88599	3.29409e-10	Phosphoglycerate mutase-like family protein
Zm00001d018532	-0.678079	8.75136e-06	NA		Zm00001d011799	4.55519	0.000171457	Nuclear transport factor 2 (NTF2) family protein		Zm00001d016164	-0.753686	3.29409e-10	GW2
Zm00001d002806	-1.31135	9.12825e-06	B-box zinc finger protein 20		Zm00001d040004	-1.93148	0.000173978	LOB domain-containing protein 42		Zm00001d023918	-1.39348	3.43139e-10	Purple acid phosphatase 10
Zm00001d005030	-0.968284	9.24322e-06	40S ribosomal protein S4-3		Zm00001d041678	1.6529	0.000173978	NA		Zm00001d017553	-1.52802	3.50573e-10	BZIP transcription factor
Zm00001d038179	2.04725	9.4809e-06	Protein NRT1/ PTR FAMILY 3.1		Zm00001d026221	3.99162	0.000174096	Protein NRT1/ PTR FAMILY 8.3		Zm00001d040660	2.10769	3.67866e-10	Late embryogenesis abundant protein
Zm00001d042764	-0.704037	9.58535e-06	hemerythrin HHE cation-binding domain protein		Zm00001d008983	2.55449	0.00017421	P-loop containing nucleoside triphosphate hydrolases superfamily protein		Zm00001d000608	-2.47853	4.24906e-10	NA
Zm00001d046937	0.844405	9.62333e-06	Basic leucine zipper 9		Zm00001d017248	1.69995	0.000175383	RmlC-like cupins superfamily protein		Zm00001d018595	-1.31593	4.84497e-10	Sulfoquinovosyl transferase SQD2
Zm00001d053745	2.50439	9.77625e-06	Probable N-acetyltransferase HLS1		Zm00001d018203	2.46472	0.000179277	Probable WRKY transcription factor 9		Zm00001d028526	-2.39205	4.96301e-10	Scarecrow-like protein 26
Zm00001d012155	1.1765	1.05455e-05	ARM repeat superfamily protein		Zm00001d016714	-1.28268	0.000179312	chaperone protein dnaJ-related		Zm00001d016933	2.25416	5.64638e-10	loricrin-related
Zm00001d029842	-2.53899	1.07325e-05	Divalent ion symporter		Zm00001d020362	-5.15606	0.000180952	Catalytic/ hydrolase		Zm00001d029387	-1.58874	7.0366e-10	LOL3
Zm00001d038180	1.33673	1.07808e-05	Protein NRT1/ PTR FAMILY 3.1		Zm00001d042099	2.44683	0.000188416	Glutathione S-transferase		Zm00001d045887	-0.819499	7.17347e-10	E3 ubiquitin-protein ligase makorin
Zm00001d011124	-0.937163	1.13597e-05	4Fe-4S binding domain containing protein expressed		Zm00001d012663	3.41845	0.000188416	Putative MATE efflux family protein		Zm00001d003248	-1.58004	7.92974e-10	Acid phosphatase/vanadium-dependent haloperoxidase-related protein
Zm00001d003950	-0.885187	1.16739e-05	Major facilitator superfamily protein		Zm00001d040185	0.523002	0.000188823	Iron-sulfur assembly protein IscA-like 1 mitochondrial		Zm00001d021047	-2.59694	7.96183e-10	Nucleotide-diphospho-sugar transferase family protein
Zm00001d053735	1.51574	1.17332e-05	Protein kinase superfamily protein		Zm00001d017807	-2.17308	0.00019084	NA		Zm00001d024889	-0.971539	8.23829e-10	Zn-finger: RanBP-type: containing protein
Zm00001d007949	2.66921	1.18475e-05	Agamous-like MADS-box protein AGL8		Zm00001d041277	2.25855	0.000193104	Putative axial regulator YABBY 2		Zm00001d010585	-1.61357	8.532e-10	UTP--glucose-1-phosphate uridylyltransferase 3 chloroplastic
Zm00001d031878	2.09899	1.2008e-05	Early nodulin 75 protein		Zm00001d013022	-2.30782	0.000204086	(+)-neomenthol dehydrogenase		Zm00001d053139	-1.85049	8.5531e-10	NA
Zm00001d053406	-1.39642	1.2008e-05	NA		Zm00001d050302	1.33224	0.000204177	DUF1262 family protein		Zm00001d038373	-1.24603	8.5531e-10	O-fucosyltransferase family protein
Zm00001d003774	-1.24956	1.20257e-05	Metallo-hydrolase/oxidoreductase superfamily protein		Zm00001d034940	2.06878	0.000219385	ABC transporter G family member 34		Zm00001d031876	1.58813	8.8252e-10	Putative dual specificity protein phosphatase DSP8
Zm00001d002725	-0.687746	1.23963e-05	Putative glucuronosyltransferase PGSIP7		Zm00001d011208	-2.10454	0.000219385	1-aminocyclopropane-1-carboxylate oxidase 1		Zm00001d052940	-2.48964	9.55694e-10	OSJNBb0045P24.5 protein
Zm00001d022075	2.29571	1.23963e-05	cytochrome P-450 17		Zm00001d031815	1.82462	0.000223039	Patatin-like protein 2		Zm00001d019399	3.79993	9.98821e-10	Putative lipid-transfer protein DIR1
Zm00001d004371	3.50138	1.24353e-05	Senescence-specific cysteine protease SAG12		Zm00001d002814	-0.802063	0.000223735	Polyprotein		Zm00001d050470	-1.81904	1.05656e-09	Phospholipase D beta 1
Zm00001d043536	-3.10132	1.25081e-05	Heat stress transcription factor C-1		Zm00001d033645	0.52065	0.000232107	Phosphatidylinositol 4-phosphate 5-kinase 8		Zm00001d002787	-0.477726	1.17857e-09	SET domain-containing protein SET104
Zm00001d014983	-1.47595	1.26295e-05	Serine carboxypeptidase-like 49		Zm00001d012444	2.97948	0.000237465	NA		Zm00001d034839	-1.77003	1.18322e-09	Purple acid phosphatase 15
Zm00001d052028	0.366265	1.32844e-05	protein kinase family protein / WD-40 repeat family protein		Zm00001d011369	-1.16799	0.000241019	Pectin lyase-like superfamily protein		Zm00001d000986	-1.99463	1.18322e-09	NA
Zm00001d037779	-3.25221	1.33531e-05	tonoplast intrinsic protein4		Zm00001d016857	2.2233	0.000241779	Zea mays ARGOS7		Zm00001d002776	3.14263	1.19448e-09	Probable receptor-like protein kinase
Zm00001d020651	-1.83635	1.33941e-05	Plant viral-response family protein		Zm00001d031877	6.1531	0.00024228	NA		Zm00001d030806	1.29236	1.26508e-09	NA
Zm00001d044547	-1.07201	1.34824e-05	Pentatricopeptide repeat-containing protein		Zm00001d006451	-1.65547	0.00024228	Squamosa promoter-binding-like protein 5		Zm00001d048702	-2.66307	1.26989e-09	benzoxazinone synthesis3
Zm00001d013193	-2.12785	1.35451e-05	CCG-binding protein 1		Zm00001d012736	1.41616	0.00024228	NA		Zm00001d011443	-2.58992	1.27009e-09	Putative AMP-dependent synthetase and ligase superfamily protein
Zm00001d013964	0.695593	1.41008e-05	ALG2-interacting protein X		Zm00001d046342	2.12834	0.00024228	kaurene oxidase2		Zm00001d020610	-3.56856	1.31851e-09	NA
Zm00001d032190	-1.05391	1.41146e-05	MYR1		Zm00001d017037	-1.59709	0.000249221	PTB domain-containing engulfment adapter protein 1 isoform 1		Zm00001d002550	3.06665	1.36788e-09	Pentatricopeptide repeat-containing protein chloroplastic
Zm00001d008212	-0.478125	1.41146e-05	NA		Zm00001d040071	1.8247	0.00025462	Glycosyltransferase family 61 protein		Zm00001d014701	-1.61519	1.3733e-09	Myb family transcription factor PHL6
Zm00001d049543	2.98455	1.41417e-05	circadian clock associated1		Zm00001d053359	-0.908533	0.00025746	Plastid division protein PDV1		Zm00001d007446	0.875078	1.42716e-09	14-3-3-like protein
Zm00001d038651	1.70053	1.41417e-05	Jacalin-related lectin 3		Zm00001d049420	3.16046	0.000259275	Germin-like protein subfamily 1 member 8		Zm00001d003144	-2.18145	1.6424e-09	Cytochrome P450 CYP71C36
Zm00001d034853	0.688772	1.44678e-05	NA		Zm00001d038514	1.57054	0.000259275	Protein LURP-one-related 8		Zm00001d007517	-1.59682	1.77883e-09	Subtilisin-like serine endopeptidase family protein
Zm00001d034523	1.72417	1.54394e-05	Pheophorbide a oxygenase		Zm00001d047893	1.59789	0.000259275	phosphoenolpyruvate carboxykinase homolog2		Zm00001d049436	2.76346	1.80254e-09	Germin-like protein subfamily 1 member 8
Zm00001d052525	0.94842	1.55375e-05	Calmodulin binding protein/ Putative calmodulin-binding family protein		Zm00001d013781	1.91541	0.000269674	Chloroplast post-illumination chlorophyll fluorescence increase protein		Zm00001d019446	-3.31427	1.80254e-09	farnesylated protein 3
Zm00001d013725	2.50208	1.58194e-05	gibberellin 20-oxidase4		Zm00001d049418	2.29268	0.000270489	Germin-like protein subfamily 1 member 8		Zm00001d033993	-0.646036	1.86549e-09	DExH-box ATP-dependent RNA helicase DExH16 mitochondrial
Zm00001d001044	2.6511	1.58341e-05	NA		Zm00001d038020	-1.27193	0.000270489	Putative leucine-rich repeat transmembrane protein kinase family protein		Zm00001d052939	-2.85994	1.88158e-09	OSJNBb0045P24.5 protein
Zm00001d018198	-0.805923	1.58341e-05	NA		Zm00001d048710	-4.8852	0.000275857	benzoxazinone synthesis2		Zm00001d020383	3.88769	2.0801e-09	Aquaporin PIP1-6
Zm00001d008758	0.407552	1.64833e-05	Syntaxin-32		Zm00001d019256	1.8468	0.000275857	UDP-glycosyltransferase 76C1		Zm00001d033139	2.70431	2.42162e-09	Cytochrome P450 71D7
Zm00001d038341	2.67342	1.65538e-05	PAR1 protein		Zm00001d039066	1.17485	0.000282383	Galactose mutarotase-like superfamily protein		Zm00001d005550	-1.20569	2.43064e-09	Phosphatidylinositol N-acetylglucosaminyltransferase GPI19/PIG-P subunit
Zm00001d042473	2.256	1.684e-05	Peptide transporter PTR2		Zm00001d049028	2.64906	0.000283441	Chitinase 2		Zm00001d011458	-1.27803	2.43125e-09	Protein kinase superfamily protein
Zm00001d012339	-1.63414	1.68438e-05	NA		Zm00001d039589	1.95518	0.000283441	gigantea2		Zm00001d034584	3.38001	2.63408e-09	isopentenyl transferase6
Zm00001d017241	-2.28517	1.69234e-05	Two-component response regulator-like APRR1		Zm00001d035619	5.71624	0.000288483	Histone H2A		Zm00001d043544	1.37621	2.73424e-09	UDP-glycosyltransferase 88A1
Zm00001d002017	3.21668	1.69896e-05	Os07g0120600 protein		Zm00001d034770	-0.822062	0.000300881	Cellulose synthase-6		Zm00001d036879	0.757746	2.80455e-09	Putative CBL-interacting protein kinase family protein
Zm00001d039451	-1.34131	1.70839e-05	Ribonuclease III family protein		Zm00001d018685	2.86993	0.000313968	NA		Zm00001d050026	-1.19467	2.82374e-09	purple acid phosphatase 23
Zm00001d040446	0.415023	1.70839e-05	Pyruvate kinase		Zm00001d032804	-0.413282	0.000314413	Inosine triphosphate pyrophosphatase		Zm00001d012325	-1.79597	2.866e-09	Tetratricopeptide repeat (TPR)-like superfamily protein
Zm00001d042669	0.353489	1.71831e-05	NA		Zm00001d044504	5.19802	0.000316478	High affinity nitrate transporter 2.7		Zm00001d003865	-1.48476	3.15408e-09	Expressed protein; protein
Zm00001d038706	-1.43412	1.71831e-05	NA		Zm00001d042654	-1.21813	0.000319056	Beta-galactosidase		Zm00001d027943	-0.788862	3.21116e-09	alpha/beta-Hydrolases superfamily protein
Zm00001d043652	1.15655	1.74964e-05	Probable choline kinase 2		Zm00001d021047	-2.22704	0.000321725	Nucleotide-diphospho-sugar transferase family protein		Zm00001d013659	1.89929	3.21116e-09	Ameiotic 1
Zm00001d008178	-1.07559	1.74964e-05	ABC transporter B family member 21		Zm00001d051125	2.16139	0.000326541	LRR receptor-like serine/threonine-protein kinase EFR		Zm00001d044748	2.30243	3.21116e-09	Pyruvate dehydrogenase E1 component subunit alpha-1 mitochondrial
Zm00001d026470	3.24733	1.76334e-05	Ripening-related protein 3		Zm00001d019078	1.53573	0.000326541	AAA-ATPase ASD mitochondrial		Zm00001d013933	-1.11698	3.22849e-09	CBS domain-containing protein CBSX5
Zm00001d014682	-1.39777	1.76954e-05	SAUR-like auxin-responsive protein family		Zm00001d049816	-1.94199	0.000326753	65-kDa microtubule-associated protein 8		Zm00001d043838	1.22063	3.60678e-09	Transparent testa 12 protein
Zm00001d038405	0.685941	1.76954e-05	Ypt/Rab-GAP domain of gyp1p superfamily protein		Zm00001d031436	-1.91794	0.000334907	OTU domain-containing protein		Zm00001d026952	-1.69326	3.63006e-09	NA
Zm00001d011183	-4.97202	1.79661e-05	thiamine biosynthesis1		Zm00001d048703	-2.1066	0.000336386	benzoxazinone synthesis4		Zm00001d043216	3.25981	3.90308e-09	Subtilisin-like serine endopeptidase family protein
Zm00001d053007	2.93974	1.85206e-05	NA		Zm00001d009222	1.81655	0.000338781	Pyrophosphate-energized vacuolar membrane proton pump 1		Zm00001d038342	-1.47366	3.90308e-09	RING/FYVE/PHD zinc finger superfamily protein
Zm00001d024527	0.806835	1.86284e-05	DNAJ heat shock family protein		Zm00001d004243	-4.22396	0.000347202	Peptidyl-prolyl cis-trans isomerase FKBP65		Zm00001d023410	-2.03046	4.37377e-09	Probable purple acid phosphatase 20
Zm00001d032972	-1.73418	1.88477e-05	Pathogenesis-related thaumatin superfamily protein		Zm00001d023617	5.34115	0.000347202	Laccase-7		Zm00001d039273	-0.94298	4.48697e-09	SOUL heme-binding family protein
Zm00001d047721	1.45684	1.91704e-05	tetratricopeptide repeat (TPR)-containing protein		Zm00001d034270	0.903799	0.00035116	Mitochondrial import inner membrane translocase subunit TIM14		Zm00001d047584	3.1456	4.8115e-09	Eukaryotic aspartyl protease family protein
Zm00001d040362	2.51244	1.9654e-05	Dof-type zinc finger DNA-binding family protein		Zm00001d048621	1.79614	0.000352071	ABC transporter G family member 11		Zm00001d043284	-1.78687	4.86385e-09	Phosphoglycerate mutase-like family protein
Zm00001d042770	3.3219	1.98199e-05	Acidic endochitinase		Zm00001d002178	3.07731	0.000357192	G-type lectin S-receptor-like serine/threonine-protein kinase B120		Zm00001d035561	-4.69368	4.89997e-09	Expressed protein; Mannose-specific jacalin-related lectin; protein
Zm00001d014055	2.68793	1.98199e-05	Protein ECERIFERUM 1		Zm00001d006022	-1.35512	0.000357192	Transcription factor bHLH130		Zm00001d012838	-0.536202	5.33867e-09	DCD (Development and Cell Death) domain protein
Zm00001d016522	-1.88424	1.98598e-05	NA		Zm00001d013071	-1.87888	0.000357192	Auxin-responsive protein IAA4		Zm00001d034604	-0.829899	5.37727e-09	KH domain-containing protein SPIN1
Zm00001d042142	-1.24214	1.99958e-05	Probable inactive purple acid phosphatase 16		Zm00001d020642	0.435626	0.000357663	Serine carboxypeptidase-like 49		Zm00001d045537	-1.2621	5.46796e-09	CYCLOPS
Zm00001d008145	-2.18696	2.02706e-05	NA		Zm00001d022608	3.81811	0.000369543	Aquaporin PIP2-2		Zm00001d018408	-2.59925	6.1351e-09	Vesicle-associated membrane protein 711
Zm00001d007016	-1.48918	2.0573e-05	Disease resistance protein RGA2		Zm00001d036281	-2.88634	0.000378321	NA		Zm00001d053406	-1.81124	6.2447e-09	NA
Zm00001d026362	0.359389	2.0847e-05	Putative MYB DNA-binding domain superfamily protein		Zm00001d033670	-0.766092	0.000387997	Phosphatidylinositol 4-phosphate 5-kinase 2		Zm00001d011369	-1.26663	6.51887e-09	Pectin lyase-like superfamily protein
Zm00001d029075	-2.53826	2.1581e-05	CBL-interacting serine/threonine-protein kinase 10		Zm00001d049113	-3.32457	0.000388351	Senescence-specific cysteine protease SAG12		Zm00001d002816	2.51369	6.7753e-09	Lactoylglutathione lyase / glyoxalase I family protein
Zm00001d007296	-0.423999	2.16387e-05	Vacuolar protein sorting-associated protein 26A		Zm00001d043121	2.68147	0.000391117	Osmotin-like protein OSM34		Zm00001d049816	-2.20476	7.13296e-09	65-kDa microtubule-associated protein 8
Zm00001d024230	-0.625609	2.16904e-05	Nuclear transcription factor Y subunit C-2		Zm00001d036392	2.19069	0.000391117	BZIP transcription factor TRAB1		Zm00001d044124	2.4268	7.24833e-09	polypeptide
Zm00001d002758	-1.56943	2.22325e-05	DeSI-like protein		Zm00001d030063	5.11729	0.000393678	NA		Zm00001d033606	-0.866863	7.32854e-09	Protein yippee-like
Zm00001d004489	-0.597629	2.31517e-05	40S ribosomal protein S23-2		Zm00001d034096	3.28413	0.000401024	cytochrome P450 family 81 subfamily D polypeptide 8		Zm00001d008733	0.916526	7.54774e-09	ABC transporter C family member 3
Zm00001d005743	-1.67363	2.31517e-05	NA		Zm00001d042848	1.32492	0.000402124	Laccase-7		Zm00001d033055	0.708071	7.88878e-09	4-coumarate--CoA ligase-like 7
Zm00001d012030	-0.46235	2.33198e-05	E2 protein isoform 5		Zm00001d032522	-2.96777	0.000409082	NA		Zm00001d029940	1.28903	8.19617e-09	Ethylene-responsive transcription factor ERF105
Zm00001d037961	0.530507	2.36208e-05	NADP-dependent malic enzyme 3		Zm00001d036735	-1.43122	0.000410879	Protein kinase superfamily protein		Zm00001d014949	-2.04948	8.47593e-09	RING-H2 finger protein ATL79
Zm00001d037710	1.51729	2.3766e-05	Pyridoxamine 5'-phosphate oxidase family protein		Zm00001d029628	-1.24161	0.000414158	cystatin7		Zm00001d044930	1.55275	8.53571e-09	EF hand family protein
Zm00001d051383	-0.860548	2.38268e-05	Vesicle-associated protein 1-3		Zm00001d002984	2.36051	0.000414158	Cytokinin-O-glucosyltransferase 1		Zm00001d034096	3.61624	8.68535e-09	cytochrome P450 family 81 subfamily D polypeptide 8
Zm00001d012029	-2.15345	2.38448e-05	S-adenosyl-L-methionine-dependent methyltransferases superfamily protein		Zm00001d028704	-0.994647	0.000434069	Thioredoxin-like protein AAED1 chloroplastic		Zm00001d037480	-1.23354	8.68535e-09	Alkaline alpha galactosidase 2
Zm00001d038874	-1.38356	2.43419e-05	Probable polygalacturonase		Zm00001d033517	2.09338	0.000434069	Major facilitator superfamily protein		Zm00001d023736	4.00284	8.68535e-09	Agamous-like MADS-box protein AGL8
Zm00001d008397	-1.86548	2.44611e-05	Nodulin-related protein 1		Zm00001d034095	2.85156	0.000434069	cytochrome P450 family 81 subfamily D polypeptide 8		Zm00001d041204	-2.16422	8.98681e-09	lipoxygenase12
Zm00001d011257	1.88374	2.44611e-05	NA		Zm00001d049436	2.49479	0.000434069	Germin-like protein subfamily 1 member 8		Zm00001d026109	2.53425	8.98681e-09	Putative polyphenol oxidase family protein
Zm00001d053200	0.379878	2.46637e-05	Ypt/Rab-GAP domain of gyp1p superfamily protein		Zm00001d044494	-0.456439	0.000434069	Pectin acetylesterase 9		Zm00001d002545	3.20425	9.01009e-09	Protein REVEILLE 1
Zm00001d016926	0.901779	2.5958e-05	ATATH13		Zm00001d000408	1.31096	0.000434069	EIN3-binding F-box protein 1		Zm00001d021957	2.09645	9.13743e-09	NA
Zm00001d043050	-1.73839	2.68315e-05	RING-H2 finger protein ATL74		Zm00001d002799	3.43387	0.000443926	Homeobox-leucine zipper protein ATHB-12		Zm00001d012677	-0.763459	9.13743e-09	Glycerophosphodiester phosphodiesterase GDPD5
Zm00001d027957	0.829484	2.71263e-05	MADS-transcription factor 68		Zm00001d025773	0.748087	0.000448496	S-adenosylmethionine decarboxylase1		Zm00001d046538	-1.36831	9.31164e-09	Sec14p-like phosphatidylinositol transfer family protein
Zm00001d012536	-0.43211	2.72289e-05	Vacuolar protein sorting-associated protein 36		Zm00001d010325	-1.09712	0.000451833	small basic membrane intrinsic protein1b		Zm00001d042512	-1.32964	9.5301e-09	Ribonuclease 2
Zm00001d043046	1.37761	2.74273e-05	Transcription repressor OFP1		Zm00001d008226	1.68889	0.000454052	Sialin		Zm00001d032972	-2.14179	9.75305e-09	Pathogenesis-related thaumatin superfamily protein
Zm00001d028164	0.927233	2.81503e-05	Sulfate transporter 2.2		Zm00001d011259	3.46103	0.000454052	Aldehyde dehydrogenase family 2 member C4		Zm00001d042809	-0.871539	1.00596e-08	Auxin transporter-like protein 1
Zm00001d051119	-1.91666	2.84845e-05	Putative RING zinc finger and VWF domain family protein		Zm00001d039880	1.90699	0.000457161	Lecithin-cholesterol acyltransferase-like 1		Zm00001d035962	-1.69448	1.02369e-08	CYCLOPS
Zm00001d039387	1.27501	2.85711e-05	SOUL heme-binding family protein		Zm00001d042142	-1.3937	0.000463484	Probable inactive purple acid phosphatase 16		Zm00001d027957	1.03772	1.06213e-08	MADS-transcription factor 68
Zm00001d048311	-2.83618	2.91175e-05	Sucrose transport protein SUC3		Zm00001d000018	1.94668	0.000463484	Germin-like protein subfamily 1 member 8		Zm00001d012378	2.38227	1.12383e-08	SOUL heme-binding family protein
Zm00001d010061	-2.05722	2.96533e-05	NA		Zm00001d026458	1.13928	0.000478679	Cysteine protease 1		Zm00001d011092	0.359494	1.14055e-08	Transcription initiation factor IIA subunit 2
Zm00001d033641	-0.489138	3.01785e-05	NA		Zm00001d020780	1.55505	0.000479966	glutathione transferase23		Zm00001d048835	-0.842811	1.1688e-08	Phosphatidate phosphatase PAH2
Zm00001d029526	1.99488	3.0528e-05	cytochrome P-450 18		Zm00001d026439	-1.07801	0.000479966	Tetratricopeptide repeat (TPR)-like superfamily protein		Zm00001d045031	-2.30366	1.17879e-08	NA
Zm00001d013651	-1.07315	3.0528e-05	Chlorophyll(ide) b reductase NOL chloroplastic		Zm00001d038748	2.35718	0.000488179	NA		Zm00001d025973	-1.4201	1.37716e-08	NA
Zm00001d028548	-3.19974	3.09059e-05	maternal effect embryo arrest 59		zma-MIR399b	-3.96234	0.000503389	NA		Zm00001d039415	3.82128	1.38852e-08	Lecithin-cholesterol acyltransferase-like 1
Zm00001d008017	-2.80002	3.09059e-05	NA		ENSRNA049997242	-3.96234	0.000503389	NA		Zm00001d012702	-1.83682	1.38852e-08	Phosphoenolpyruvate carboxylase 3
Zm00001d009418	1.19436	3.09059e-05	alpha/beta-Hydrolases superfamily protein		Zm00001d009196	0.999831	0.000503389	NA		Zm00001d031815	1.91769	1.40631e-08	Patatin-like protein 2
Zm00001d042662	1.25365	3.0946e-05	Putative 1-phosphatidylinositol-3-phosphate 5-kinase FAB1D		Zm00001d037779	3.43786	0.000503389	tonoplast intrinsic protein4		Zm00001d023995	2.53745	1.50223e-08	Sec14p-like phosphatidylinositol transfer family protein
Zm00001d035494	0.888651	3.10953e-05	Probable beta-14-xylosyltransferase IRX9		Zm00001d026204	-2.06819	0.000503389	Putative MYB DNA-binding domain superfamily protein		Zm00001d012764	3.06572	1.58595e-08	malic enzyme4
Zm00001d033670	0.663707	3.16574e-05	Phosphatidylinositol 4-phosphate 5-kinase 2		Zm00001d023269	1.53233	0.000513834	VQ		Zm00001d049588	-1.45376	1.72876e-08	Putative leucine-rich repeat receptor-like protein kinase family protein
Zm00001d002372	1.38211	3.17129e-05	evolutionarily conserved C-terminal region 10		Zm00001d043166	1.57381	0.000525206	UDP-glycosyltransferase 87A1		Zm00001d010821	0.935663	1.73446e-08	starch synthase4
Zm00001d001883	-1.49488	3.19704e-05	Polyamine oxidase, Seed germinatio		Zm00001d014650	1.21508	0.000526854	Disease resistance protein RPM1		Zm00001d017642	2.96235	1.76042e-08	Protein REVEILLE 1
Zm00001d005479	-1.24594	3.19704e-05	Metal transporter Nramp6		Zm00001d011092	0.32267	0.000532509	Transcription initiation factor IIA subunit 2		Zm00001d002788	-1.21835	1.76589e-08	Cyclin-U4-2
Zm00001d020692	1.42886	3.23454e-05	Beta-13-galactosyltransferase 7		Zm00001d048219	-1.36833	0.000532509	RmlC-like cupins superfamily protein		Zm00001d046500	-1.52327	1.76589e-08	SPX domain-containing protein 1
Zm00001d000137	-0.642604	3.23454e-05	Putative pentatricopeptide repeat-containing protein mitochondrial		Zm00001d005252	-1.57553	0.000550709	Leucine-rich repeat receptor-like tyrosine-protein kinase PXC3		Zm00001d008808	1.84154	1.79735e-08	Putative MYB DNA-binding domain superfamily protein
Zm00001d040726	1.56151	3.26607e-05	Mitochondrial substrate carrier family protein		Zm00001d034551	-1.59689	0.000556421	Polygalacturonase QRT2		Zm00001d008966	2.76124	1.83611e-08	Serine/threonine-protein kinase
Zm00001d038465	-1.90832	3.26607e-05	Major facilitator superfamily protein		Zm00001d020497	-1.53326	0.000559896	CBL-interacting serine/threonine-protein kinase 6		Zm00001d005932	2.39188	1.87081e-08	Aldose reductase
Zm00001d011611	0.52601	3.36664e-05	Katanin p60 ATPase-containing subunit A1		Zm00001d006864	-0.552978	0.000564033	NA		Zm00001d040004	-2.09749	2.04519e-08	LOB domain-containing protein 42
Zm00001d017678	-0.832955	3.43955e-05	Putative RING-H2 finger protein ATL53		Zm00001d012221	-4.54265	0.000564033	stearoyl-acyl-carrier-protein desaturase9		Zm00001d044138	1.38064	2.09783e-08	siroheme uroporphyrinogen methyltransferase1
Zm00001d027681	4.20328	3.49179e-05	NA		Zm00001d003626	3.16174	0.000586112	NAC domain-containing protein 104		Zm00001d029839	-1.70504	2.14464e-08	Protein NEN2
Zm00001d008600	-1.66639	3.49179e-05	Sulfoquinovosyl transferase SQD2		Zm00001d042932	-1.41193	0.000586112	Protein UPSTREAM OF FLC		Zm00001d024450	1.17002	2.18765e-08	NA
Zm00001d053682	-0.477127	3.56852e-05	Zinc finger CCCH domain-containing protein 52		Zm00001d018744	-1.37506	0.000586112	Putative cyclotide family protein		Zm00001d018465	1.31236	2.19688e-08	NA
Zm00001d043293	1.09911	3.56852e-05	cytokinin oxidase 4		Zm00001d020823	2.85364	0.000586112	basic leucine-zipper 58		Zm00001d042345	4.44392	2.24154e-08	PIN-formed protein5
Zm00001d021288	-1.49519	3.62825e-05	Senescence-inducible chloroplast stay-green protein 1		Zm00001d023410	-1.72723	0.000586112	Probable purple acid phosphatase 20		Zm00001d037059	-0.634457	2.27001e-08	Alpha-glucan water dikinase 1 chloroplastic
Zm00001d029048	0.276496	3.65834e-05	Eukaryotic translation initiation factor 2 beta subunit		Zm00001d025352	-1.40966	0.000586112	Ferredoxin-3 chloroplastic		Zm00001d026224	-0.955224	2.34621e-08	NA
Zm00001d053545	1.31114	3.65834e-05	NAD(P)-binding Rossmann-fold superfamily protein		Zm00001d053757	3.27058	0.000589514	Galactose mutarotase-like superfamily protein		Zm00001d032300	-1.0709	2.36168e-08	Major facilitator superfamily protein
Zm00001d013720	3.23423	3.68568e-05	cytochrome P450 family 87 subfamily A polypeptide 2		Zm00001d009399	-2.84724	0.000598521	Protein NRT1/ PTR FAMILY 6.2		Zm00001d004918	-1.07862	2.40624e-08	NA
Zm00001d023534	-0.696828	3.68568e-05	5-formyltetrahydrofolate cyclo-ligase1		Zm00001d053230	1.97587	0.000611099	NA		Zm00001d046281	1.67091	2.46751e-08	NA
Zm00001d032209	-1.03846	3.71388e-05	NA		Zm00001d026223	-1.5102	0.000626608	Hydrogen peroxide-induced 1		Zm00001d004635	-1.92259	2.53055e-08	Leucine-rich repeat protein kinase family protein
Zm00001d015233	1.19107	3.71388e-05	Squamosa promoter-binding-like protein 2		Zm00001d034888	-4.54476	0.000659194	Probable WRKY transcription factor 14		Zm00001d012551	1.2971	2.56581e-08	NA
Zm00001d035657	-1.02379	3.81384e-05	Putative E3 ubiquitin-protein ligase XBAT31		Zm00001d015658	2.10646	0.000659194	Transmembrane amino acid transporter family protein		Zm00001d016189	-6.9008	2.59246e-08	Dirigent
Zm00001d043768	0.773998	3.86875e-05	Core-2/I-branching beta-16-N-acetylglucosaminyltransferase family protein		Zm00001d016671	2.64499	0.000659194	NA		Zm00001d015297	-0.82452	2.629e-08	protein; Ternary complex factor MIP1-like
Zm00001d000914	1.13464	3.87741e-05	NA		Zm00001d018867	-0.846114	0.000659194	Syntaxin 132		Zm00001d018667	4.99837	3.00263e-08	MADS3
Zm00001d047690	0.528793	3.87741e-05	Nucleic acid-binding proteins superfamily		Zm00001d037961	-0.581207	0.000675248	NADP-dependent malic enzyme 3		Zm00001d052775	-1.39622	3.01602e-08	Expressed protein; protein
Zm00001d000915	1.13285	3.92487e-05	NA		Zm00001d027623	2.07534	0.000706625	myb domain protein 121		Zm00001d030812	-1.95657	3.18867e-08	NA
Zm00001d018038	1.21781	3.92487e-05	Putative NAC domain-containing protein 94		Zm00001d008190	1.37275	0.000706625	Probable WRKY transcription factor 47		Zm00001d052063	1.22095	3.2036e-08	Transmembrane amino acid transporter family protein
Zm00001d050307	-0.831626	3.97225e-05	NA		Zm00001d016165	-0.395453	0.000718569	Ubiquitin carboxyl-terminal hydrolase 15		Zm00001d013339	-0.765587	3.36176e-08	Expressed protein; protein
Zm00001d006348	-0.583882	3.98025e-05	growth-regulating factor 9		Zm00001d025145	2.74813	0.00072302	NA		Zm00001d008819	1.82535	3.36176e-08	IQ-domain 25
Zm00001d017378	-1.66793	3.99814e-05	E3 ubiquitin-protein ligase RMA1		Zm00001d012426	-1.75247	0.000725622	Protein UPSTREAM OF FLC		Zm00001d041082	2.10477	3.39341e-08	kaurene synthase4
Zm00001d038775	0.502127	3.99814e-05	ATP-dependent 6-phosphofructokinase 3		Zm00001d043544	1.16313	0.000732243	UDP-glycosyltransferase 88A1		Zm00001d052027	-0.950584	3.43129e-08	NA
Zm00001d016895	1.78361	4.0982e-05	Gibberellin receptor GID1L2		Zm00001d023859	-3.37652	0.000743369	Respiratory burst oxidase homolog protein B		Zm00001d024210	3.87734	3.50211e-08	terpene synthase6
Zm00001d043354	-0.379773	4.13369e-05	Zinc finger BED domain-containing protein DAYSLEEPER		Zm00001d045884	3.05848	0.000747679	ADPATP carrier protein 1 mitochondrial		Zm00001d045024	2.61187	3.54375e-08	NA
Zm00001d011060	-0.680431	4.13369e-05	Putative E3 ubiquitin-protein ligase XBAT31		Zm00001d027383	-1.49236	0.000750598	Hydroxymethylglutaryl-CoA synthase		Zm00001d022669	-2.46847	3.54485e-08	NA
Zm00001d053376	1.03419	4.18523e-05	AAA-type ATPase family protein / ankyrin repeat family protein		Zm00001d016544	0.628274	0.000761144	Glycosyltransferase family 61 protein		Zm00001d020177	-1.59451	3.62521e-08	Cytochrome P450 71A26
Zm00001d040324	-1.46123	4.40869e-05	Serine/threonine-protein kinase-like protein		Zm00001d051415	-2.76024	0.000764143	Mechanosensitive ion channel protein 6		Zm00001d031952	1.23774	4.0541e-08	NA
Zm00001d041308	1.13767	4.44906e-05	K(+) efflux antiporter 3 chloroplastic		Zm00001d018418	-0.532837	0.000780707	oxidoreductase zinc-binding dehydrogenase family protein		Zm00001d047418	3.07821	4.0541e-08	Cytochrome P450 709B2
Zm00001d013702	-0.880713	4.5006e-05	nucleosome/chromatin assembly factor C		Zm00001d032636	1.69621	0.000790501	Putative GEM-like protein 8		Zm00001d042244	3.13324	4.16907e-08	Potasium ion uptake permease 1
Zm00001d020773	0.852951	4.50257e-05	FIP1		Zm00001d044987	-0.623893	0.000790501	Putative DUF231 domain containing family protein		Zm00001d003436	-1.92827	4.26665e-08	Galactose mutarotase-like superfamily protein
Zm00001d046154	2.21998	4.53807e-05	Putative RING zinc finger domain superfamily protein		Zm00001d026248	1.48097	0.000810172	Putative RING zinc finger domain superfamily protein isoform 1/ Putative RING zinc finger domain superfamily protein isoform 2		Zm00001d049113	-3.52886	4.45658e-08	Senescence-specific cysteine protease SAG12
Zm00001d008856	-0.532932	4.59889e-05	NA		Zm00001d043596	2.27214	0.000813133	Lachrymatory-factor synthase		Zm00001d006864	-0.601023	4.45658e-08	NA
Zm00001d010149	0.544896	4.67089e-05	NA		Zm00001d000298	2.57476	0.000813133	BRASSINOSTEROID INSENSITIVE 1-associated receptor kinase 1		Zm00001d049418	2.36061	4.567e-08	Germin-like protein subfamily 1 member 8
Zm00001d049554	-0.988337	4.67433e-05	Putative glycerol-3-phosphate transporter 1		Zm00001d042047	2.34158	0.000815608	5-epiaristolochene 13-dihydroxylase		Zm00001d014516	-0.815876	4.62412e-08	Probable mitochondrial intermediate peptidase mitochondrial
Zm00001d006212	-2.0176	4.67433e-05	Two-component response regulator-like APRR9		Zm00001d042353	2.52961	0.000815608	sucrose phosphate synthase2		Zm00001d003924	-1.75055	4.6894e-08	Glycerophosphodiester phosphodiesterase GDPD2
Zm00001d000124	0.429932	4.67433e-05	Probable protein phosphatase 2C 40		Zm00001d018181	-2.96303	0.000815608	flavonol synthase2		Zm00001d039933	-3.16572	4.8656e-08	16.9 kDa class I heat shock protein 1
Zm00001d010969	-1.15155	4.71098e-05	Tetraspanin-6		Zm00001d010052	1.8756	0.000815608	NA		Zm00001d040446	0.487062	4.93381e-08	Pyruvate kinase
Zm00001d036671	0.743796	4.77794e-05	NA		Zm00001d047345	1.05066	0.000821367	Expressed protein; protein		Zm00001d010627	1.41425	5.06362e-08	Protein LURP-one-related 8
Zm00001d007227	-0.864486	4.86395e-05	DNA replication complex GINS protein PSF2		Zm00001d052940	-2.02163	0.000826182	OSJNBb0045P24.5 protein		Zm00001d038806	-3.40047	5.12105e-08	Chaperone protein ClpB1
Zm00001d024547	2.11635	4.86395e-05	Putative MYB DNA-binding domain superfamily protein		Zm00001d011067	1.00293	0.000826182	NA		Zm00001d024903	-4.25091	5.19443e-08	heat shock protein 90 kDa
Zm00001d013021	2.10561	4.89308e-05	isopentenyl transferase5		Zm00001d039822	1.61211	0.000829666	LRR receptor-like serine/threonine-protein kinase EFR		Zm00001d009243	0.865458	5.60894e-08	ABC transporter C family member 4
Zm00001d034984	-2.24978	4.89308e-05	Putative NAC domain transcription factor superfamily protein		Zm00001d034045	3.40519	0.000830619	Agamous-like MADS-box protein AGL8		Zm00001d033067	4.67735	5.90697e-08	Potassium transporter 5
Zm00001d047680	-1.25193	4.99211e-05	Calmodulin-binding protein 60 G		Zm00001d039936	-4.27778	0.000830619	17.4 kDa class I heat shock protein		Zm00001d053727	1.54488	6.03321e-08	Pyrophosphate-energized vacuolar membrane proton pump 1
Zm00001d014489	-1.00067	5.00582e-05	Putative beta-glucosidase 41		Zm00001d000017	1.82107	0.000845577	Germin-like protein		Zm00001d008862	6.40687	6.03321e-08	cytokinin oxidase 5
Zm00001d047972	-1.12981	5.04087e-05	Putative inositol polyphosphate phosphatase (Synaptogenin-like) family protein		Zm00001d034182	-3.2526	0.000875134	NA		Zm00001d049008	-2.64261	6.50439e-08	Apyrase 1
Zm00001d038812	0.456782	5.17098e-05	homeobox2		Zm00001d000006	2.27786	0.000881029	Germin-like protein subfamily 1 member 11		Zm00001d049233	-1.83756	6.93795e-08	Protein RALF-like 33
Zm00001d026042	-1.97814	5.21685e-05	Probable purine permease 11		Zm00001d039310	3.66517	0.00089978	Cytochrome P450 71A26		Zm00001d038250	-2.09016	7.33146e-08	HSP40/DnaJ peptide-binding protein
Zm00001d032106	1.54152	5.22486e-05	NA		Zm00001d008961	1.65644	0.000900541	NA		Zm00001d044541	-1.96174	7.46581e-08	SPX domain-containing protein 3
Zm00001d011164	-1.29067	5.37779e-05	NA		Zm00001d024207	3.55169	0.000900541	Alpha-humulene/(-)-(E)-beta-caryophyllene synthase		Zm00001d016934	2.15778	7.65364e-08	Galactose mutarotase-like superfamily protein
Zm00001d007195	-1.28748	5.38052e-05	Alpha-L-arabinofuranosidase 1		Zm00001d045873	-1.08274	0.000908257	Putative endo-1:4-beta-mannosidase family protein		Zm00001d017545	-1.90958	7.74538e-08	SEC14 cytosolic factor family protein / phosphoglyceride transfer family protein
Zm00001d037778	-0.620512	5.39781e-05	Acyl-CoA N-acyltransferases (NAT) superfamily protein		Zm00001d025973	-1.18696	0.000908257	NA		Zm00001d013105	2.04748	7.77214e-08	Calcium-dependent protein kinase 20
Zm00001d002126	0.787373	5.4375e-05	loricrin-related		Zm00001d035475	1.95735	0.000913802	Isovaleryl-CoA dehydrogenase mitochondrial		Zm00001d043551	0.817618	7.80807e-08	dehydrin6
Zm00001d030132	1.68367	5.51902e-05	4-coumarate--CoA ligase-like 6		Zm00001d001871	-1.6537	0.000940614	NA		Zm00001d009967	-1.34292	7.94521e-08	UDP-sulfoquinovose synthase chloroplastic
Zm00001d031653	-1.31354	5.51902e-05	Glycerophosphodiester phosphodiesterase GDPD2		Zm00001d022059	-1.26201	0.000955235	PLASMODESMATA CALLOSE-BINDING PROTEIN 2		Zm00001d046888	1.97646	7.94521e-08	B-box zinc finger family protein/ Putative B-box type zinc finger family protein
Zm00001d017545	-1.55042	5.51902e-05	SEC14 cytosolic factor family protein / phosphoglyceride transfer family protein		Zm00001d006212	2.22144	0.000975107	Two-component response regulator-like APRR9		Zm00001d014897	0.347345	7.97593e-08	proline-rich spliceosome-associated (PSP) family protein
Zm00001d025623	1.4008	5.51902e-05	Vacuolar iron transporter 1		Zm00001d042433	-0.807685	0.000975107	Histone deacetylase HDT1		Zm00001d038133	-0.778856	8.299e-08	Cyclin-U3-1
Zm00001d026457	-1.9178	5.51902e-05	DNA topoisomerase 2		Zm00001d016921	3.48523	0.000975107	NA		Zm00001d027623	2.20106	8.61176e-08	myb domain protein 121
Zm00001d020726	2.03989	5.54671e-05	Probable protein phosphatase 2C 12		Zm00001d046667	-1.32487	0.000990239	NA		Zm00001d011718	0.515696	8.66254e-08	zinc knuckle (CCHC-type) family protein
Zm00001d004918	-0.828973	5.57608e-05	NA		Zm00001d016446	0.983831	0.000992514	Cysteine proteinase 1		Zm00001d048799	1.25434	8.72852e-08	Pistil-specific extensin-like protein
Zm00001d024471	1.61024	5.59085e-05	NA		Zm00001d029648	2.45201	0.00100406	copalyl diphosphate synthase2		Zm00001d018525	-0.889231	9.07457e-08	Plant intracellular Ras-group-related LRR protein 9
Zm00001d051053	-1.6265	5.62611e-05	NA		Zm00001d048985	-1.42806	0.00101184	Expressed protein; protein		Zm00001d006561	-1.20314	9.79932e-08	DUF538 family protein
Zm00001d029264	0.564141	5.69217e-05	CDPK-related kinase 1		Zm00001d021244	-1.88511	0.00101184	ATP-dependent DNA helicase		Zm00001d004553	-0.90316	1.00624e-07	Zinc finger (C3HC4-type RING finger) family protein
Zm00001d018464	1.66772	5.69217e-05	NA		Zm00001d050395	0.321311	0.0010287	GDT1-like protein 4		Zm00001d038595	-1.07873	1.02666e-07	myosin heavy chain-related
Zm00001d027500	1.65815	5.72306e-05	Flower-specific gamma-thionin		Zm00001d039495	-1.29233	0.00103125	Zinc finger CCCH domain-containing protein 23		Zm00001d046155	-1.19786	1.02666e-07	PLASMODESMATA CALLOSE-BINDING PROTEIN 5
Zm00001d003288	0.590336	5.8653e-05	Eukaryotic translation initiation factor 4B2		Zm00001d049432	2.84343	0.00103644	Germin-like protein subfamily 1 member 8		Zm00001d047659	-2.46779	1.03536e-07	phosphoinositide binding
Zm00001d041973	-0.479902	5.8982e-05	Eukaryotic translation initiation factor 4E-1		Zm00001d013151	2.1641	0.00103644	Transcription factor JUNGBRUNNEN 1		Zm00001d047893	1.60272	1.10973e-07	phosphoenolpyruvate carboxykinase homolog2
Zm00001d019407	3.71855	5.9119e-05	Acidic endochitinase		Zm00001d028180	-1.26898	0.00104546	low phytic acid1		Zm00001d019254	1.21843	1.13286e-07	UDP-glycosyltransferase 76C1
Zm00001d016884	0.960272	5.93706e-05	F11F12.5 protein		Zm00001d048234	1.25655	0.00104546	NA		Zm00001d008619	0.477648	1.15806e-07	triose phosphate isomerase3
Zm00001d003865	-1.10117	5.95535e-05	Expressed protein; protein		Zm00001d020953	1.93915	0.00104937	Protein PIN-LIKES 3		Zm00001d042935	-2.21355	1.19827e-07	NA
Zm00001d029438	-1.53954	6.06248e-05	RING-H2 finger protein ATL3		Zm00001d047663	1.95221	0.00104937	Acetate/butyrate--CoA ligase AAE7 peroxisomal		Zm00001d047690	0.62993	1.21053e-07	Nucleic acid-binding proteins superfamily
Zm00001d029711	1.6368	6.06248e-05	Basic-leucine zipper (bZIP) transcription factor family protein		Zm00001d021189	0.65857	0.00108492	Probable transcription factor PosF21		Zm00001d024016	-1.17527	1.27023e-07	zinc finger (Ran-binding) family protein
Zm00001d043849	-2.72475	6.2711e-05	NA		Zm00001d005097	1.01248	0.00110579	NA		Zm00001d053745	2.78346	1.27232e-07	Probable N-acetyltransferase HLS1
Zm00001d029025	-1.58493	6.30351e-05	23-bisphosphoglycerate-independent phosphoglycerate mutase 1		Zm00001d042111	-1.86102	0.00111196	tassels replace upper ears1		Zm00001d043121	2.74149	1.31397e-07	Osmotin-like protein OSM34
Zm00001d016974	0.968207	6.352e-05	NA		Zm00001d031878	2.14513	0.00111196	Early nodulin 75 protein		Zm00001d022075	2.57258	1.32299e-07	cytochrome P-450 17
Zm00001d044573	0.235664	6.4162e-05	Pre-mRNA-processing protein 40A		Zm00001d044620	-1.24925	0.0011238	DCD (Development and Cell Death) domain protein		Zm00001d022514	-1.6254	1.39629e-07	Pentatricopeptide repeat-containing protein
Zm00001d045359	-0.959313	6.59564e-05	Mitogen-activated protein kinase kinase 2		Zm00001d008153	-1.56104	0.00113642	NA		Zm00001d032999	1.57755	1.39695e-07	DOF40 C2C2-DOF type transcription factor
Zm00001d037783	-1.72208	6.61336e-05	Putative receptor protein kinase ZmPK1		Zm00001d004115	1.29375	0.00114536	NA		Zm00001d050357	-0.560017	1.39695e-07	THO complex subunit 4C
Zm00001d000381	1.40262	6.6742e-05	Putative ARM repeat-containing protein containing family protein		Zm00001d007485	2.23406	0.00114536	LRR receptor-like serine/threonine-protein kinase GSO2		Zm00001d049073	1.93142	1.40418e-07	NifS-like protein
Zm00001d040034	1.3774	6.69823e-05	Multicopper oxidase LPR2		Zm00001d018667	5.16713	0.00115166	MADS3		Zm00001d039923	1.5388	1.42689e-07	PR5-like receptor kinase
Zm00001d039589	-1.60545	6.76024e-05	gigantea2		Zm00001d031023	1.4848	0.00115501	L-type lectin-domain containing receptor kinase IX.1		Zm00001d037721	1.75719	1.46714e-07	UDP-glycosyltransferase 72B1
Zm00001d053939	1.09044	6.85532e-05	Polyketide cyclase/dehydrase and lipid transport superfamily protein		Zm00001d052064	1.84366	0.00115862	Glutamate receptor 2.7		Zm00001d010234	-0.921009	1.48143e-07	Probable receptor-like protein kinase
Zm00001d004197	3.18378	7.05308e-05	Triacylglycerol lipase 2		Zm00001d012561	1.49541	0.00116669	Cystatin2/ Cysteine proteinase inhibitor/ Putative cystatin		Zm00001d024752	1.18079	1.48143e-07	Peroxidase 64
Zm00001d016016	-2.38705	7.11315e-05	Dynein light chain LC6: flagellar outer arm		Zm00001d037242	1.70074	0.00116669	Urea-proton symporter DUR3		Zm00001d017287	2.3373	1.48556e-07	NA
Zm00001d030131	0.757755	7.16579e-05	Choline-phosphate cytidylyltransferase 2		Zm00001d039139	2.2139	0.00116669	Carbohydrate-binding X8 domain superfamily protein		Zm00001d009600	-1.10468	1.48967e-07	Retrovirus-related Pol polyprotein LINE-1
Zm00001d009759	-1.59058	7.22976e-05	Vacuolar-processing enzyme gamma-isozyme		Zm00001d004443	-1.24142	0.00117537	Probable cinnamyl alcohol dehydrogenase 9		Zm00001d004705	2.77812	1.50679e-07	Amino acid permease 2
Zm00001d003646	-0.538943	7.52439e-05	Methylthiotransferase		Zm00001d008431	3.2844	0.00118587	Paired amphipathic helix protein Sin3-like 5		Zm00001d026586	-1.14455	1.66555e-07	Lysine-specific histone demethylase 1
Zm00001d004903	3.64229	7.58678e-05	NA		Zm00001d018701	4.66416	0.00121563	Galactoside 2-alpha-L-fucosyltransferase		Zm00001d029361	-0.466416	1.69908e-07	NA
Zm00001d052586	-1.21618	7.58831e-05	Cationic amino acid transporter 6 chloroplastic		Zm00001d015862	2.52048	0.0012452	NA		Zm00001d018625	-1.95049	1.69908e-07	Calcineurin-like metallo-phosphoesterase superfamily protein
Zm00001d039100	2.13974	7.60107e-05	NA		zma-MIR399h	-4.54648	0.00126627	NA		Zm00001d015862	2.72817	1.71644e-07	NA
Zm00001d049163	-0.351074	7.60922e-05	SUMO-activating enzyme subunit 1B-2		ENSRNA049997333	-4.54648	0.00126627	NA		Zm00001d016921	3.48589	1.75193e-07	NA
Zm00001d006165	-0.955647	7.60922e-05	Transcription factor TCP9		Zm00001d033602	1.18858	0.00127138	Nuclear transcription factor Y subunit A-9		Zm00001d047830	-2.1791	1.79618e-07	kaurenoic acid oxidase2
Zm00001d017574	0.490508	7.65433e-05	ORMDL family protein		Zm00001d052903	-0.764721	0.00127138	3-hydroxy-3-methylglutaryl-coenzyme A reductase 2		Zm00001d049692	1.97009	1.80122e-07	Agamous-like MADS-box protein AGL12
Zm00001d002055	3.03404	7.70005e-05	Ripening-related protein 3		Zm00001d013869	0.89089	0.0012911	Auxin-responsive protein SAUR32		Zm00001d031639	2.0627	1.84076e-07	ACR4
Zm00001d017296	0.903255	7.70005e-05	NA		Zm00001d037721	1.68702	0.00129117	UDP-glycosyltransferase 72B1		Zm00001d033338	-1.57733	1.84076e-07	NAD(P)-linked oxidoreductase superfamily protein
Zm00001d035270	0.782737	7.70572e-05	Sterile alpha motif (SAM) domain-containing protein		Zm00001d029842	2.55025	0.00131051	Divalent ion symporter		Zm00001d013242	0.705074	1.84076e-07	Ankyrin repeat family protein
Zm00001d035309	-0.731029	7.72142e-05	NA		Zm00001d035162	1.90381	0.00132389	LHT1		Zm00001d025623	1.67303	1.84076e-07	Vacuolar iron transporter 1
Zm00001d032353	1.24103	7.84755e-05	blue-light receptor phototropin 2		zma-MIR399a	-2.98025	0.00133839	NA		Zm00001d007180	-1.25801	1.85196e-07	Cytochrome P450 714A1
Zm00001d007961	-0.423346	7.93452e-05	NA		ENSRNA049997262	-2.98025	0.00133839	NA		Zm00001d049165	-1.45814	1.89763e-07	Squamosa promoter-binding-like protein 18
Zm00001d052595	2.76157	7.9557e-05	Ribulose bisphosphate carboxylase small chain: chloroplastic		Zm00001d014682	1.41741	0.00133839	SAUR-like auxin-responsive protein family		Zm00001d020006	2.34977	1.91715e-07	Pyrophosphate--fructose 6-phosphate 1-phosphotransferase subunit alpha 2
Zm00001d022628	-0.863764	8.12804e-05	R2R3MYB-domain protein		Zm00001d025059	-1.62393	0.00133839	Germin-like protein subfamily 1 member 8		Zm00001d002666	-4.18939	1.93122e-07	ATP-dependent DNA helicase
Zm00001d011904	1.10088	8.14118e-05	Vesicle-associated protein 2-2		Zm00001d042490	-1.00558	0.00134099	Glycosyltransferase		Zm00001d044547	-1.20395	1.98791e-07	Pentatricopeptide repeat-containing protein
Zm00001d052852	-1.07879	8.14444e-05	Probable protein phosphatase 2C 6		Zm00001d045392	-4.52719	0.00135658	Early nodulin 93		Zm00001d031077	3.32189	2.01857e-07	Cation/H(+) antiporter 19
Zm00001d013796	0.794513	8.15009e-05	dicer-like 105		Zm00001d042135	2.29265	0.00135754	Amino-acid permease BAT1		Zm00001d052245	1.5506	2.01866e-07	Exocyst complex component SEC6
Zm00001d053091	-2.64248	8.15296e-05	Adagio protein 3		Zm00001d029823	1.64024	0.00136251	RING-H2 finger protein ATL57		Zm00001d037005	2.74919	2.17217e-07	Putative FAD-binding Berberine family protein
Zm00001d012247	0.464633	8.41956e-05	Serine hydroxymethyltransferase 7		Zm00001d052180	-1.01867	0.00139354	tunicate1		Zm00001d029495	-1.08303	2.19912e-07	NA
Zm00001d003312	-0.949605	8.44727e-05	3-ketoacyl-CoA thiolase 2 peroxisomal		Zm00001d025281	1.54295	0.00140058	Putative AP2/EREBP transcription factor superfamily protein		Zm00001d029922	-1.15019	2.27178e-07	Flavin-containing monooxygenase FMO GS-OX5
Zm00001d044168	-1.50857	8.44727e-05	Heat stress transcription factor C-1		Zm00001d043257	1.35685	0.00141073	G-type lectin S-receptor-like serine/threonine-protein kinase CES101		Zm00001d003116	-1.1854	2.35049e-07	Major facilitator superfamily protein
Zm00001d010855	0.644493	8.44727e-05	Stress protein/ Stress-related protein		Zm00001d011420	2.63096	0.00141073	Putative cytochrome P450 superfamily protein		Zm00001d008145	-4.15651	2.35049e-07	NA
Zm00001d024546	2.05936	8.45463e-05	circadian clock associated2		Zm00001d025901	-1.17128	0.00141073	FIP1		ENSRNA049464595	1.21394	2.35239e-07	NA
Zm00001d018093	1.74384	8.55555e-05	NA		Zm00001d048718	-0.930996	0.00142388	Galactose oxidase/kelch repeat superfamily protein		Zm00001d005473	0.517085	2.35989e-07	mRNA-decapping enzyme-like protein
Zm00001d018470	1.19608	8.66787e-05	Carboxyl-terminal-processing peptidase 2 chloroplastic		Zm00001d036630	0.527379	0.00142388	Filamentation temperature-sensitive H 2B/ Filamentation temperature-sensitive H 2B isoform 1/ Filamentation temperature-sensitive H 2B isoform 2		Zm00001d016662	0.848653	2.39785e-07	NA
Zm00001d032591	0.340416	8.66984e-05	Endosomal targeting BRO1-like domain-containing protein		Zm00001d008457	1.65577	0.00144524	PR5-like receptor kinase		Zm00001d048234	1.32537	2.39785e-07	NA
Zm00001d028469	-1.11867	9.05127e-05	NA		Zm00001d049704	2.09633	0.00145379	HXXXD-type acyl-transferase family protein		Zm00001d024762	1.15988	2.39872e-07	Putative CBL-interacting protein kinase family protein
Zm00001d032956	0.298499	9.08421e-05	Acylamino-acid-releasing enzyme		Zm00001d005143	1.18856	0.00146131	bZIP transcription factor family protein		Zm00001d010523	0.618675	2.42648e-07	Sucrose-phosphatase 1
Zm00001d018452	0.526913	9.19282e-05	F-box protein PP2-B10		Zm00001d042863	3.63954	0.00146926	NA		Zm00001d001044	2.94888	2.43435e-07	NA
Zm00001d047681	-0.998462	9.30098e-05	Pentatricopeptide repeat-containing protein		Zm00001d031876	1.24932	0.00149098	Putative dual specificity protein phosphatase DSP8		Zm00001d015475	-1.69322	2.45292e-07	RING-H2 finger protein ATL2L
Zm00001d013869	-0.79672	9.37987e-05	Auxin-responsive protein SAUR32		Zm00001d049173	1.72672	0.00151697	Putative WRKY DNA-binding domain superfamily protein		Zm00001d045538	-1.1056	2.45292e-07	Superoxide dismutase
Zm00001d034034	-0.438677	9.39039e-05	Protein TORNADO 1		Zm00001d018246	-0.680518	0.00152513	Kinesin heavy chain-like protein		Zm00001d002867	1.31335	2.45328e-07	Ethylene-responsive transcription factor ERF053
Zm00001d004348	2.89729	9.41777e-05	Natterin-4		Zm00001d028620	-0.886074	0.00152906	Putative clathrin assembly protein		Zm00001d044548	-0.936808	2.47274e-07	DNA-damage-repair/toleration protein DRT102
Zm00001d022637	-1.67241	9.41777e-05	THAUMATIN-LIKE PROTEIN 1		Zm00001d046952	0.990967	0.00152906	Allantoate deiminase		Zm00001d004401	2.75718	2.48718e-07	Germin-like protein subfamily 1 member 8
Zm00001d026439	0.896684	9.42908e-05	Tetratricopeptide repeat (TPR)-like superfamily protein		Zm00001d033862	-1.52665	0.00153367	1-aminocyclopropane-1-carboxylate synthase6		Zm00001d037628	-1.598	2.54048e-07	Putative ankyrin repeat domain family protein
Zm00001d051080	1.63127	9.43374e-05	Adenine phosphoribosyltransferase 2		Zm00001d035494	-0.933507	0.00156509	Probable beta-14-xylosyltransferase IRX9		Zm00001d039566	-3.40247	2.58725e-07	17.5 kDa class II heat shock protein
Zm00001d007117	-1.15954	9.61079e-05	GTP-binding protein OBGC chloroplastic		Zm00001d049831	0.985059	0.00157377	Nodulin-like protein		Zm00001d034318	-0.944454	2.65944e-07	GTP-binding protein-related
Zm00001d024937	0.793321	9.61079e-05	OSJNBa0089E12.13 protein; protein		Zm00001d003059	2.96801	0.00157377	Probable low-specificity L-threonine aldolase 1		Zm00001d014391	0.975757	2.71092e-07	nramp aluminum transporter1
Zm00001d003414	-0.895223	9.73358e-05	NAC domain-containing protein 79		Zm00001d004248	2.34827	0.00157377	UDP-glycosyltransferase 85A7		Zm00001d046676	1.06434	2.7174e-07	tryptophan synthase beta type 2
Zm00001d009856	-0.669764	9.75964e-05	Heparan-alpha-glucosaminide N-acetyltransferase		Zm00001d031673	3.33421	0.00157805	Ethylene-responsive transcription factor ERF112		Zm00001d017807	-2.15906	2.72561e-07	NA
Zm00001d045870	0.486874	9.77327e-05	Protein HOMOLOG OF MAMMALIAN LYST-INTERACTING PROTEIN 5		Zm00001d038403	3.65549	0.00157805	NA		Zm00001d025773	0.754129	2.75872e-07	S-adenosylmethionine decarboxylase1
Zm00001d032334	1.11648	9.8539e-05	Probable phospholipid-transporting ATPase 8		Zm00001d047752	2.67047	0.00159078	Putative LOB domain-containing family protein		Zm00001d011832	1.3879	2.85351e-07	G-type lectin S-receptor-like serine/threonine-protein kinase SD2-5
Zm00001d007517	-1.12657	9.8539e-05	Subtilisin-like serine endopeptidase family protein		Zm00001d052343	1.50806	0.00160019	Probable serine/threonine-protein kinase WNK5		Zm00001d026141	-2.27317	2.88649e-07	NA
Zm00001d021787	0.433398	9.8539e-05	Sphingosine kinase 1		Zm00001d049286	1.83336	0.00160206	LRR receptor-like serine/threonine-protein kinase EFR		Zm00001d015658	2.16837	2.92977e-07	Transmembrane amino acid transporter family protein
Zm00001d001582	1.39484	0.000101346	NA		Zm00001d026470	-3.30039	0.00160206	Ripening-related protein 3		Zm00001d044320	-1.24848	2.94124e-07	OSJNBa0089E12.13 protein; protein
Zm00001d026317	-1.16156	0.000102899	Transcription factor PIF4		Zm00001d006177	-1.01661	0.00160216	Protein HAPLESS 2		Zm00001d000199	0.613431	3.02381e-07	Nicotinamide adenine dinucleotide transporter 1 chloroplastic
Zm00001d018781	1.05447	0.000103015	Seed maturation protein		Zm00001d016616	2.19478	0.00160717	Ethylene-responsive transcription factor ERF115		Zm00001d028894	0.378169	3.05533e-07	Ubiquitin-conjugating enzyme E2 32
Zm00001d035409	-2.96331	0.000103128	Abscisic stress-ripening protein 2		Zm00001d021204	-0.912363	0.00164392	Flap endonuclease GEN-like 1		Zm00001d017574	0.587408	3.05533e-07	ORMDL family protein
Zm00001d039513	-2.03475	0.00010334	Auxin-responsive protein IAA26		Zm00001d038301	-1.37514	0.0016456	NA		Zm00001d025016	-1.20718	3.11652e-07	Thioredoxin superfamily protein
Zm00001d002343	-1.97659	0.000103469	Zinc transporter 1		Zm00001d021877	-0.749067	0.00164855	Adenylyl-sulfate kinase1		Zm00001d013255	-2.51758	3.1205e-07	NA
Zm00001d052212	1.05179	0.000104581	Probable RNA-binding protein ARP1		Zm00001d000556	2.97914	0.00168103	NA		Zm00001d024600	-2.02335	3.20006e-07	ABC transporter B family member 19
Zm00001d038302	0.521601	0.000105287	Protein ROS1		Zm00001d011041	1.54678	0.00168103	UPA23		Zm00001d025296	1.05793	3.21207e-07	Nudix hydrolase 13
Zm00001d048109	-1.29687	0.000105287	Remorin family protein		Zm00001d025065	1.41803	0.00168103	Putative D-mannose binding lectin receptor-like protein kinase family protein		Zm00001d045264	1.39338	3.23092e-07	GDSL esterase/lipase
Zm00001d026032	-1.9501	0.000105287	Putative RING zinc finger domain superfamily protein		Zm00001d033846	-1.84128	0.00168375	NA		Zm00001d024207	3.71701	3.33493e-07	Alpha-humulene/(-)-(E)-beta-caryophyllene synthase
Zm00001d014701	-1.13692	0.000106186	Myb family transcription factor PHL6		Zm00001d043989	-1.3009	0.00168502	F-box/kelch-repeat protein		Zm00001d018698	1.18884	3.35558e-07	Homeodomain-like superfamily protein
Zm00001d003251	-1.02567	0.000108379	Restriction endonuclease type II-like superfamily protein		Zm00001d017241	2.29727	0.00168502	Two-component response regulator-like APRR1		Zm00001d038651	1.86313	3.43063e-07	Jacalin-related lectin 3
Zm00001d017698	1.37756	0.000108379	Oligopeptide transporter 4		Zm00001d011319	2.33713	0.00168502	ABC transporter G family member 40		Zm00001d000686	-3.67802	3.49257e-07	NA
Zm00001d046569	0.717657	0.000108379	Protein kinase superfamily protein with octicosapeptide/Phox/Bem1p domain		Zm00001d051554	1.96386	0.00171682	abscisic acid 8'-hydroxylase2		Zm00001d014447	1.41494	3.53285e-07	Serine carboxypeptidase-like 19
Zm00001d048220	2.1103	0.000108379	Outer arm dynein light chain 1 protein		Zm00001d022264	-0.987874	0.00171682	proteolipid membrane potential regulator5		Zm00001d031149	-2.02732	3.53788e-07	Dihydroceramide fatty acyl 2-hydroxylase FAH1
Zm00001d001068	-0.575598	0.000108505	NA		Zm00001d009108	0.446021	0.00171682	RING/U-box superfamily protein		Zm00001d050302	1.26513	3.57655e-07	DUF1262 family protein
Zm00001d023636	0.289885	0.000109879	Zinc finger CCCH domain-containing protein 67		Zm00001d007363	2.89788	0.00173924	BRASSINOSTEROID INSENSITIVE 1-associated receptor kinase 1		Zm00001d019527	1.80783	3.78525e-07	Yucca5
Zm00001d044053	-2.69753	0.000110223	Phospholipase A1-IIgamma		Zm00001d042449	-1.36014	0.00174284	BCL-2 binding anthanogene-1		Zm00001d043566	-0.455801	3.81565e-07	Protein STICHEL-like 3
Zm00001d037531	3.49307	0.000110223	Putative AP2/EREBP transcription factor superfamily protein		Zm00001d011177	-0.446598	0.00174748	Vacuolar protein-sorting protein 33		Zm00001d042684	-1.45416	3.90145e-07	Protein NRT1/ PTR FAMILY 5.10
Zm00001d046538	-1.00768	0.000112467	Sec14p-like phosphatidylinositol transfer family protein		Zm00001d009243	0.74454	0.00176765	ABC transporter C family member 4		Zm00001d009010	-1.35861	3.94874e-07	Plasma membrane-associated cation-binding protein 1
Zm00001d008307	1.36246	0.000112905	NA		Zm00001d032787	1.1898	0.00178385	Phloem-specific lectin		Zm00001d050208	0.39608	4.18863e-07	Galactose mutarotase-like superfamily protein
Zm00001d038866	0.909863	0.000114013	alpha/beta-Hydrolases superfamily protein		Zm00001d028761	-1.39623	0.00179534	Tetratricopeptide repeat (TPR)-like superfamily protein		Zm00001d044285	-1.35136	4.30698e-07	calcineurin B-like10
Zm00001d030937	0.501613	0.000114047	Protein kinase superfamily protein with octicosapeptide/Phox/Bem1p domain		Zm00001d033924	0.702847	0.00179856	NA		Zm00001d021520	0.482746	4.354e-07	RanBP2-type zinc finger protein
Zm00001d013530	1.67027	0.000114316	5'-AMP-activated protein kinase-related		Zm00001d018123	-0.660414	0.00180487	Mitochondrial transcription termination factor family protein		Zm00001d024937	0.950785	4.36014e-07	OSJNBa0089E12.13 protein; protein
Zm00001d046661	0.928972	0.000116529	Amino acid transporter-like protein/ Amino acid transporter-like protein isoform 1/ Amino acid transporter-like protein isoform 2		Zm00001d033836	1.01068	0.00182656	Sec14p-like phosphatidylinositol transfer family protein		Zm00001d038748	2.29367	4.4162e-07	NA
Zm00001d023736	3.08708	0.000118183	Agamous-like MADS-box protein AGL8		Zm00001d049433	2.26689	0.00182656	Germin-like protein subfamily 1 member 8		Zm00001d013892	0.468963	4.60697e-07	Methionine aminopeptidase
Zm00001d024523	0.56672	0.000118183	Ramosa 1 enhancer locus 2/ Ramosa1 enhancer locus2		Zm00001d020607	2.00554	0.00182656	Dormancy-associated protein homolog 3		Zm00001d013021	2.42697	4.63234e-07	isopentenyl transferase5
Zm00001d047507	-1.07975	0.000120669	Putative RING zinc finger domain superfamily protein		Zm00001d018712	2.4668	0.00183165	NA		Zm00001d024208	3.47156	4.75078e-07	Alpha-humulene/(-)-(E)-beta-caryophyllene synthase
Zm00001d039328	-1.52952	0.000121595	hAT transposon superfamily		Zm00001d004250	2.45703	0.00183654	NA		Zm00001d031436	-1.88683	4.78709e-07	OTU domain-containing protein
Zm00001d029681	-1.13919	0.000121852	peptidoglycan-binding LysM domain-containing protein		Zm00001d052011	-1.53312	0.00184178	Heparanase-like protein 3		Zm00001d052796	0.479329	4.84738e-07	14-3-3-like protein A
Zm00001d016558	-1.55869	0.000121852	glycosyl hydrolase family 10 protein / carbohydrate-binding domain-containing protein		Zm00001d052245	1.38794	0.00184178	Exocyst complex component SEC6		Zm00001d019624	-0.748285	4.88306e-07	NA
Zm00001d036244	1.84572	0.000123114	Probable WRKY transcription factor 30		Zm00001d033489	-5.6717	0.00184381	Plant cysteine oxidase 2		Zm00001d049420	3.00055	5.17518e-07	Germin-like protein subfamily 1 member 8
Zm00001d019282	-0.407857	0.000127091	Pectin lyase-like superfamily protein		Zm00001d049911	-2.65289	0.00184502	Ubiquitin carboxyl-terminal hydrolase		Zm00001d038531	-0.528152	5.21587e-07	Probable prolyl 4-hydroxylase 4
Zm00001d052220	-1.90742	0.000130625	NA		Zm00001d010828	1.85508	0.0018455	alpha/beta-Hydrolases superfamily protein		Zm00001d044132	-2.1931	5.24477e-07	Aspartic proteinase A1
Zm00001d029922	-0.909847	0.00013241	Flavin-containing monooxygenase FMO GS-OX5		Zm00001d043216	2.60843	0.00184757	Subtilisin-like serine endopeptidase family protein		Zm00001d039350	0.449005	5.27233e-07	Cwf15 / Cwc15 cell cycle control family protein
Zm00001d022188	-0.696567	0.000132811	Copper-transporting atpase paa1		Zm00001d023292	0.776833	0.00186723	Trigger factor-like protein TIG Chloroplastic		Zm00001d010109	0.451293	5.27611e-07	LETM1-like protein
Zm00001d024597	-0.956303	0.000134028	NA		Zm00001d052063	1.03153	0.00187028	Transmembrane amino acid transporter family protein		Zm00001d014769	-0.580129	5.36119e-07	NA
Zm00001d005579	-0.979818	0.000134543	Lipid phosphate phosphatase 2		Zm00001d037711	-0.958071	0.00187028	Leucine-rich repeat extensin-like protein 3		Zm00001d022373	-0.83321	5.46484e-07	S-adenosyl-L-methionine-dependent methyltransferases superfamily protein
Zm00001d036215	-0.384155	0.000134836	MAP kinase7		Zm00001d047235	-0.803592	0.00187028	Serine carboxypeptidase-like 51		Zm00001d002333	-2.00922	5.67515e-07	Potassium transporter 10
Zm00001d044652	1.8892	0.000134926	nucleotide sugar transporter-KT 1		Zm00001d017263	-2.92188	0.00187932	Protein LIGHT-DEPENDENT SHORT HYPOCOTYLS 3		Zm00001d044814	-0.399266	6.01473e-07	Protein kinase domain superfamily protein
Zm00001d033462	2.24375	0.000135469	Auxin responsive protein		Zm00001d011904	-1.19253	0.00190073	Vesicle-associated protein 2-2		Zm00001d000534	-5.37075	6.05429e-07	NA
Zm00001d020040	-0.537351	0.000136175	Lipid phosphate phosphatase 2		Zm00001d025988	1.00656	0.00190843	GATA transcription factor 26		Zm00001d043621	-2.28206	6.22686e-07	Phosphatase phospho1
Zm00001d011985	-0.800072	0.000136594	Transcription factor TCP11		Zm00001d010287	1.39144	0.00192026	WAT1-related protein		Zm00001d031494	2.30831	6.3126e-07	Putative L-ascorbate peroxidase 6
Zm00001d047025	-0.794736	0.000141341	PLATZ transcription factor family protein		Zm00001d010410	2.51106	0.00192157	tonoplast intrinsic protein4		Zm00001d023580	-1.30959	6.33802e-07	Aldehyde dehydrogenase
Zm00001d020748	0.731761	0.000142203	Polyadenylate-binding protein RBP47B		Zm00001d012325	-1.41119	0.00196878	Tetratricopeptide repeat (TPR)-like superfamily protein		Zm00001d043392	0.552212	6.36699e-07	Plant cysteine oxidase 5
Zm00001d031486	0.367574	0.000144992	Serine/threonine-protein phosphatase 7		Zm00001d002261	0.991432	0.00200296	Peroxisomal (S)-2-hydroxy-acid oxidase GLO1		Zm00001d034868	1.24774	6.41361e-07	ATPase
Zm00001d033189	-0.711661	0.000146732	NA		Zm00001d018124	-0.720706	0.00200296	Mitochondrial transcription termination factor family protein		Zm00001d017138	-1.41801	6.4763e-07	Transcription factor bHLH128
Zm00001d014596	2.19848	0.000147112	Alpha-L-fucosidase 2		Zm00001d003534	-0.756583	0.00201377	Pentatricopeptide repeat-containing protein		Zm00001d012706	-1.02097	6.4763e-07	Acetamidase/Formamidase family protein
Zm00001d031203	1.21536	0.000148453	alpha/beta-Hydrolases superfamily protein		Zm00001d040205	-1.52736	0.00201424	Non-specific phospholipase C6		Zm00001d032042	3.75215	6.4968e-07	Cytochrome P450 CYP78A53
Zm00001d034175	-1.29941	0.000148784	CCG-binding protein 1		Zm00001d014542	-1.21854	0.00201424	NA		Zm00001d007783	-1.18739	6.50605e-07	P-loop containing nucleoside triphosphate hydrolases superfamily protein
Zm00001d054015	-1.28149	0.000148784	Peptidyl-prolyl cis-trans isomerase FKBP18 chloroplastic		Zm00001d011413	1.54024	0.00201424	Putative WRKY DNA-binding domain superfamily protein		Zm00001d038732	-1.53408	6.51902e-07	Acid phosphatase/vanadium-dependent haloperoxidase-related protein
Zm00001d015463	2.37733	0.000149321	CASP-like protein 9		Zm00001d036387	0.482085	0.00201424	plant/F20M13-60 protein		Zm00001d007403	3.21472	6.69304e-07	Chalcone synthase WHP1
Zm00001d019850	-1.06223	0.000150104	Fatty acyl-CoA reductase 1		Zm00001d045651	2.92032	0.00205265	NA		Zm00001d048876	0.612712	6.82029e-07	OSJNBa0016N04.16 protein; OSJNBb0042I07.4 protein
Zm00001d018598	-0.553091	0.000154022	Proline transporter 2		Zm00001d026390	-2.89808	0.00205268	NA		Zm00001d033092	1.36087	6.90327e-07	Alpha-soluble NSF attachment protein 2
Zm00001d022245	1.68206	0.000154494	IQ domain-containing protein IQM2		Zm00001d039933	-2.67091	0.00210181	16.9 kDa class I heat shock protein 1		Zm00001d021572	-0.843009	7.10602e-07	UDP-glycosyltransferase 71B1
Zm00001d000430	0.482258	0.000154497	magnesium transporter1		Zm00001d046513	0.761904	0.00210181	NA		Zm00001d031168	-0.833597	7.25872e-07	Glycine-rich RNA-binding protein 2
Zm00001d044435	-1.27795	0.000157754	DUF679 domain membrane protein 7		Zm00001d042627	-0.783976	0.00210279	UDP-glucuronate:xylan alpha-glucuronosyltransferase 1		Zm00001d028561	-4.7033	7.29927e-07	17.4 kDa class I heat shock protein
Zm00001d014383	-1.2904	0.000160329	3-hydroxyisobutyrate dehydrogenase		Zm00001d023811	2.30848	0.00214961	Pathogenesis-related protein STH-21		Zm00001d018435	-1.7416	7.29927e-07	NAC domain containing protein 74
Zm00001d017420	-0.752454	0.000162286	GT-2-like 1		Zm00001d021895	-2.10043	0.00216512	Beta-hexosaminidase		Zm00001d041945	0.426112	7.30578e-07	transducin family protein / WD-40 repeat family protein
Zm00001d049446	2.19134	0.000163476	NA		Zm00001d011620	-0.940082	0.00217155	DUF1639 family protein		Zm00001d001043	2.66082	7.56036e-07	NA
Zm00001d049809	-0.594741	0.00016627	NA		Zm00001d024789	2.2423	0.00217155	(Z)-3-hexen-1-ol acetyltransferase		Zm00001d047680	-1.44018	7.98485e-07	Calmodulin-binding protein 60 G
Zm00001d000401	-0.93447	0.00016627	FAD-dependent oxidoreductase family protein		Zm00001d031432	-4.50706	0.00219925	NA		Zm00001d021048	-3.5222	7.99399e-07	Nucleotide-diphospho-sugar transferase family protein
Zm00001d048129	-0.493743	0.000167642	Metal transporter Nramp3		Zm00001d031778	5.62538	0.00222372	Carbonic anhydrase		Zm00001d013038	-2.03602	7.99523e-07	Cupredoxin superfamily protein
Zm00001d001772	0.793671	0.00017072	Protein YLS9		Zm00001d018596	0.517534	0.00222372	Probable calcium-binding protein CML27		Zm00001d049427	2.25462	8.11795e-07	Germin-like protein subfamily 1 member 8
Zm00001d047981	1.88329	0.000170821	Glutamate decarboxylase 1		Zm00001d021732	2.18945	0.00222398	Cellulose synthase-like protein D3		Zm00001d041592	0.480484	8.31225e-07	modifier of snc1
Zm00001d008961	-1.39436	0.000171439	NA		Zm00001d038351	-0.965083	0.00224463	Adenine nucleotide alpha hydrolases-like superfamily protein		Zm00001d004248	2.46863	8.34097e-07	UDP-glycosyltransferase 85A7
Zm00001d047531	0.63999	0.000171439	Putative AGC-like protein kinase family protein isoform 1/ Putative AGC-like protein kinase family protein isoform 2/ Putative AGC-like protein kinase family protein isoform 3/ Serine/threonine-protein kinase AtPK19		Zm00001d025993	-4.31814	0.00224463	NA		Zm00001d014983	-1.5615	8.39026e-07	Serine carboxypeptidase-like 49
Zm00001d046812	1.03316	0.0001721	Chaperone protein dnaJ 8 chloroplastic		Zm00001d052390	1.72647	0.00225611	Arabidopsis NAC domain containing protein 87		Zm00001d005072	-0.8701	8.4507e-07	F-box/LRR-repeat protein 3
Zm00001d013241	0.531298	0.000173525	NA		Zm00001d028533	-0.373312	0.00227265	Calcium ion binding protein		Zm00001d020071	-1.78878	8.58964e-07	Sugar transport protein 14
Zm00001d004355	3.34981	0.000175559	Senescence-specific cysteine protease SAG12		Zm00001d049630	-1.26661	0.00227265	Galactose oxidase/kelch repeat superfamily protein		Zm00001d021571	-0.842497	8.71774e-07	UDP-glycosyltransferase 71B1
Zm00001d036759	0.454002	0.000175559	Phox (PX) domain-containing protein		Zm00001d049727	1.32798	0.00228942	Acidic endochitinase		Zm00001d044460	1.68126	8.84195e-07	alpha/beta-Hydrolases superfamily protein
Zm00001d016640	0.336136	0.000178442	TUDOR-SN protein 1		Zm00001d024798	2.58755	0.00231615	NA		Zm00001d019048	-0.670794	8.84195e-07	SEC12-like protein 1
Zm00001d003712	-1.40028	0.000181192	abscisic acid stress ripening3		Zm00001d029349	2.04397	0.00231877	NA		Zm00001d038552	1.1482	8.89664e-07	NA
Zm00001d000733	-1.42919	0.000181284	NA		Zm00001d003144	-1.65832	0.00231877	Cytochrome P450 CYP71C36		Zm00001d036281	-2.91153	8.8994e-07	NA
Zm00001d050043	-1.19343	0.000181415	Putative wound responsive protein/ Putative wound responsive protein isoform 1/ Putative wound responsive protein isoform 2/ Wound responsive protein		Zm00001d000610	-1.74624	0.00235508	NA		Zm00001d049821	-0.815546	8.95386e-07	DHBP synthase RibB-like alpha/beta domain
Zm00001d000561	-0.654659	0.000181538	NA		Zm00001d047447	-1.50374	0.00235932	Phosphoinositide phospholipase C 2		Zm00001d028693	1.79391	9.12277e-07	safener induced1
Zm00001d005185	-0.359806	0.000181648	PHD finger protein ALFIN-LIKE 2		Zm00001d018598	0.60855	0.0023923	Proline transporter 2		Zm00001d038436	-1.55648	9.12277e-07	Abscisic acid receptor PYL5
Zm00001d007065	0.251431	0.000182443	Nuclear pore complex protein NUP98A		Zm00001d030544	0.952238	0.00240808	Glyoxylate reductase		Zm00001d024960	3.24937	9.15523e-07	Bowman-Birk type trypsin inhibitor
Zm00001d026156	-1.41826	0.000182443	Putative glycerol-3-phosphate transporter 1		Zm00001d037519	-1.92252	0.00242745	DCD (Development and Cell Death) domain protein		Zm00001d040731	-0.94092	9.65555e-07	Alpha-L-fucosidase 2
Zm00001d035235	-0.477918	0.000182573	Protein cornichon homolog 1		Zm00001d027483	-1.50878	0.00243348	RING-H2 finger protein ATL80		Zm00001d003593	-1.05235	9.68691e-07	Expressed protein; protein
Zm00001d032091	1.51505	0.000182927	SAUR33-auxin-responsive SAUR family member		Zm00001d023677	2.06763	0.00243348	sugars will eventually be exported transporter13a		Zm00001d012400	-0.834306	9.77789e-07	Probable methyltransferase PMT10
Zm00001d013997	-1.64251	0.000182927	Cysteine-rich receptor-like protein kinase 2		Zm00001d029645	2.10369	0.00244956	Putative polyol transporter 1		Zm00001d051480	2.18872	9.91356e-07	Protein REVEILLE 1
Zm00001d009077	0.389621	0.000182927	Mono-/di-acylglycerol lipase N-terminal;Lipase class 3		Zm00001d006561	-1.02001	0.00244956	DUF538 family protein		Zm00001d049419	2.08596	1.04242e-06	Germin-like protein subfamily 1 member 8
Zm00001d024722	0.440116	0.0001835	NA		Zm00001d036197	3.41444	0.00245726	HXXXD-type acyl-transferase family protein		Zm00001d016806	1.14541	1.04255e-06	UDP-glucuronate:xylan alpha-glucuronosyltransferase 1
Zm00001d003889	-0.894942	0.000191359	Trihelix transcription factor ASR3		Zm00001d040660	1.55559	0.00247341	Late embryogenesis abundant protein		Zm00001d049430	1.94106	1.05272e-06	Germin-like protein subfamily 1 member 8
Zm00001d018112	-0.319966	0.000192488	Polyadenylate-binding protein 3		Zm00001d015464	0.55189	0.00247341	Calmodulin binding protein		Zm00001d033602	1.22527	1.07548e-06	Nuclear transcription factor Y subunit A-9
Zm00001d015469	0.60612	0.000193603	desynaptic2		Zm00001d024353	-2.9087	0.00247341	Paired amphipathic helix repeat family protein		Zm00001d051779	-5.1174	1.08657e-06	Probable aspartyl protease
Zm00001d037719	-0.705134	0.000193603	Abscisic acid receptor PYL9		Zm00001d014654	1.05484	0.00249956	Disease resistance protein RPM1		Zm00001d036244	2.15787	1.11115e-06	Probable WRKY transcription factor 30
Zm00001d032144	2.27502	0.000193625	AP2-like ethylene-responsive transcription factor		Zm00001d022965	2.01754	0.00250943	NA		Zm00001d015131	-1.14369	1.12241e-06	NA
Zm00001d034868	1.01414	0.000196434	ATPase		Zm00001d037059	-0.514322	0.00254918	Alpha-glucan water dikinase 1 chloroplastic		Zm00001d053538	-2.34439	1.13504e-06	Cwf21
Zm00001d034746	3.72438	0.000196828	Pectinesterase inhibitor domain containing protein		Zm00001d000609	-1.7448	0.00258295	NA		Zm00001d027353	-1.19121	1.13975e-06	Retinol dehydrogenase 12
Zm00001d020418	1.5003	0.000199206	Cytokinin hydroxylase		Zm00001d049431	2.43469	0.0026123	Germin-like protein subfamily 1 member 8		Zm00001d013627	0.782009	1.14731e-06	DWNN domain a CCHC-type zinc finger
Zm00001d033222	1.16151	0.000200774	viviparous14		Zm00001d038972	1.17687	0.0026123	Probable ubiquitin-conjugating enzyme E2 24		Zm00001d014606	2.32289	1.15018e-06	Peroxidase 45
Zm00001d016681	-1.40318	0.000200774	PAN domain-containing protein		Zm00001d045839	1.91964	0.0026123	Putative lectin-like receptor protein kinase family protein		Zm00001d028151	1.05004	1.16593e-06	Putative polyol transporter 1
Zm00001d018341	-0.367337	0.000201094	Serine/arginine-rich splicing factor RSZ22		Zm00001d048311	2.8315	0.0026123	Sucrose transport protein SUC3		Zm00001d015239	1.20219	1.17514e-06	Camelliol C synthase
Zm00001d018150	-1.74948	0.000204465	NA		Zm00001d048414	0.641785	0.0026123	Expressed protein; protein		Zm00001d031434	-1.21865	1.19301e-06	DNA-damage-repair/toleration protein DRT100
Zm00001d047402	1.18454	0.000204465	Putative calmodulin-binding family protein		Zm00001d000122	-0.715791	0.0026123	forkhead-associated domain-containing protein / FHA domain-containing protein		Zm00001d027091	-3.5265	1.19301e-06	NA
Zm00001d026448	-1.22945	0.000204694	Floral homeotic protein APETALA 2		Zm00001d049430	1.77955	0.00262779	Germin-like protein subfamily 1 member 8		Zm00001d050055	2.67924	1.22762e-06	NA
Zm00001d035063	-2.01911	0.000204865	GDSL esterase/lipase		Zm00001d008968	1.91886	0.00262779	Putative AP2/EREBP transcription factor superfamily protein		Zm00001d043970	1.70146	1.24848e-06	NA
Zm00001d053639	-1.0677	0.000206569	NA		Zm00001d008017	2.73274	0.00263032	NA		Zm00001d029038	2.95731	1.25141e-06	HAD superfamily subfamily IIIB acid phosphatase
Zm00001d037303	3.28036	0.000206569	Senescence-specific cysteine protease SAG12		Zm00001d038089	-0.704807	0.00263032	Major facilitator superfamily protein		Zm00001d024855	0.300396	1.26583e-06	Cullin-1
Zm00001d008535	-1.75446	0.000208171	NA		Zm00001d016998	1.18147	0.00263648	18S pre-ribosomal assembly protein gar2-related		Zm00001d053359	-0.886287	1.27729e-06	Plastid division protein PDV1
Zm00001d033018	1.13759	0.000211078	Glyceraldehyde-3-phosphate dehydrogenase-like family protein		Zm00001d027748	-0.690507	0.00265334	Probable RNA helicase SDE3		Zm00001d047275	-1.30293	1.30302e-06	PLC-like phosphodiesterases superfamily protein
Zm00001d040461	1.00614	0.000211078	Calmodulin-binding protein 25		Zm00001d044022	4.54094	0.00266836	seed maturation protein PM41		Zm00001d042653	-1.06671	1.31117e-06	HSP40/DnaJ peptide-binding protein
Zm00001d039213	-0.562403	0.000211078	Seed maturation protein		Zm00001d036638	3.09917	0.0026889	Putative MYB DNA-binding domain superfamily protein		Zm00001d032229	-0.894386	1.31473e-06	Regulator of chromosome condensation (RCC1) family protein
Zm00001d045124	-2.52534	0.000211078	Protein kinase superfamily protein with octicosapeptide/Phox/Bem1p domain		Zm00001d014649	1.44481	0.00270105	Disease resistance protein RPM1		Zm00001d022198	1.15744	1.31477e-06	SAP domain-containing protein
Zm00001d032854	-1.97505	0.000211337	Peroxidase 59		Zm00001d015747	0.680571	0.00270105	Protein disulfide-isomerase like 2-1		Zm00001d003621	-0.616783	1.3568e-06	U-box domain-containing protein 33
Zm00001d025900	1.38054	0.000211337	Putative GEM-like protein 8		Zm00001d017284	-1.1646	0.00270105	Auxin response factor 16		Zm00001d028264	-0.528894	1.3607e-06	UDP-3-O-acyl N-acetylglycosamine deacetylase family protein
Zm00001d029571	0.867202	0.000212213	zinc finger (C3HC4-type RING finger) family protein		Zm00001d017881	-0.483221	0.00270105	ADP-ribosylation factor GTPase-activating protein AGD12		Zm00001d053189	-0.969452	1.3607e-06	Probable mediator of RNA polymerase II transcription subunit 26c
Zm00001d007323	-1.11491	0.000212591	Disease resistance protein RPM1		Zm00001d044753	-0.594655	0.00270105	Elongin		Zm00001d004782	0.298465	1.3607e-06	Transducin/WD40 repeat-like superfamily protein
Zm00001d018418	0.432702	0.000212591	oxidoreductase zinc-binding dehydrogenase family protein		Zm00001d048178	2.33035	0.00270105	Polyol transporter protein 4		Zm00001d021131	-1.10936	1.3607e-06	Phospholipase A(1) LCAT3
Zm00001d032522	2.22862	0.000214038	NA		Zm00001d042781	1.29981	0.00271396	Zinc finger protein WIP6		Zm00001d003386	-0.988866	1.40588e-06	NA
Zm00001d007285	-3.23504	0.000214038	NADP-dependent alkenal double bond reductase P2		Zm00001d038704	0.274473	0.00271677	Transcription factor VOZ1		Zm00001d007157	-1.38614	1.40588e-06	NA
Zm00001d027571	0.386921	0.000220589	Probable protein phosphatase 2C 48		Zm00001d043509	-2.13197	0.00276209	Pectinesterase		Zm00001d015347	2.55773	1.40588e-06	Germin-like protein subfamily 1 member 8
Zm00001d016544	-0.517648	0.000221017	Glycosyltransferase family 61 protein		Zm00001d024961	1.26252	0.00276775	Serine/threonine protein kinase		Zm00001d046745	1.95314	1.43169e-06	NA
Zm00001d029654	0.867207	0.000223175	trehalase1		Zm00001d053211	-0.677365	0.0027708	ER lumen protein retaining receptor family protein		Zm00001d035233	-4.05735	1.44303e-06	NA
Zm00001d018335	-1.02278	0.000223175	Protein SUPPRESSOR OF MAX2 1		Zm00001d019399	2.83665	0.0027708	Putative lipid-transfer protein DIR1		Zm00001d029645	2.1045	1.44832e-06	Putative polyol transporter 1
Zm00001d048147	-0.531756	0.000223175	Syntaxin-61		Zm00001d053749	0.633495	0.00277534	knotted related homeobox7		Zm00001d027681	4.54558	1.45788e-06	NA
Zm00001d048908	0.674446	0.000225821	RING/FYVE/PHD zinc finger superfamily protein		Zm00001d003800	1.09898	0.00280062	alpha/beta-Hydrolases superfamily protein		Zm00001d034460	-0.641897	1.45991e-06	tryptophan synthase A homolog1
Zm00001d049015	2.7295	0.000225821	heparan-alpha-glucosaminide N-acetyltransferase-like protein		Zm00001d028243	-1.70007	0.00281704	Glucan endo-13-beta-glucosidase 3		Zm00001d012322	2.04115	1.47329e-06	cytochrome P450 family 81 subfamily D polypeptide 8
Zm00001d049638	0.823039	0.000225821	Transcription factor GTE8		Zm00001d049601	5.51135	0.00281723	Tyrosine decarboxylase 1		Zm00001d048416	1.68332	1.48612e-06	FAD/NAD(P)-binding oxidoreductase family protein
Zm00001d047125	2.30302	0.000225821	Pectin acetylesterase 9		Zm00001d014689	-0.514953	0.00283852	L-arabinokinase		Zm00001d028718	2.99482	1.49206e-06	Hydrophobic protein RCI2B
Zm00001d043694	-0.479279	0.000226197	Probable magnesium transporter NIPA9		Zm00001d053394	1.0476	0.00286522	NA		Zm00001d015463	2.77418	1.49644e-06	CASP-like protein 9
Zm00001d026298	2.09498	0.000227799	Putative heavy metal transport/detoxification superfamily protein		Zm00001d044127	-0.235939	0.00286522	putative transcription factor		Zm00001d036955	-2.66983	1.4972e-06	1-aminocyclopropane-1-carboxylate oxidase1
Zm00001d038003	-1.51188	0.000228161	NA		Zm00001d018871	1.08954	0.00286689	C2 calcium/lipid-binding plant phosphoribosyltransferase family protein		Zm00001d015356	1.99189	1.52437e-06	4-hydroxyphenylpyruvate dioxygenase 1
Zm00001d012043	1.03929	0.000231312	Protein XRI1		Zm00001d030282	-0.513729	0.00290145	Probable alpha-mannosidase		Zm00001d043550	-2.31015	1.55928e-06	RING-H2 finger protein ATL67
Zm00001d046705	-1.94431	0.000231554	Dihydroflavonol-4-reductase		Zm00001d034062	-1.41918	0.00292503	PLASMODESMATA CALLOSE-BINDING PROTEIN 2		Zm00001d029461	-1.83372	1.57074e-06	Protein LAZ1 homolog 2
Zm00001d013453	-0.308723	0.000233908	DEAD-box ATP-dependent RNA helicase 21		Zm00001d028389	1.43606	0.00294155	NA		Zm00001d035046	1.21483	1.57074e-06	Non-lysosomal glucosylceramidase
Zm00001d005554	-1.08955	0.000236374	Two-pore potassium channel 3		Zm00001d043152	0.561627	0.00294196	Dihydropyrimidinase		Zm00001d036364	1.8441	1.57074e-06	NAC domain containing protein 36
Zm00001d017248	-1.32586	0.000236374	RmlC-like cupins superfamily protein		Zm00001d047436	1.66588	0.00294196	AAA-ATPase ASD mitochondrial		Zm00001d034248	-1.34528	1.64328e-06	NA
Zm00001d050132	-1.11209	0.000239298	bri1-like receptor kinase3		Zm00001d021336	-0.981564	0.00295877	Serine/threonine-protein kinase STY17		Zm00001d011259	3.07402	1.64328e-06	Aldehyde dehydrogenase family 2 member C4
Zm00001d014808	0.38614	0.000241615	Protein FREE1		Zm00001d047923	-0.77224	0.00296004	Putative DUF869 domain containing family protein		Zm00001d004919	-1.05519	1.67151e-06	uncharacterized protein
Zm00001d048945	1.64858	0.000242974	Protein WVD2-like 3		Zm00001d045191	1.11706	0.00296522	Probable receptor-like protein kinase		Zm00001d000137	-0.711504	1.68105e-06	Putative pentatricopeptide repeat-containing protein mitochondrial
Zm00001d028045	-0.913591	0.000243084	Mannose-1-phosphate guanylyltransferase 1		Zm00001d016081	-1.00567	0.00297568	Extra-large G-protein-like; protein		Zm00001d017095	1.68183	1.69496e-06	High affinity nitrate transporter
Zm00001d046813	1.01093	0.000244252	Chaperone protein dnaJ 8 chloroplastic		Zm00001d002160	-2.06364	0.00298773	Wound-responsive family protein		Zm00001d044147	2.43784	1.7084e-06	cytochrome P450 family 72 subfamily A polypeptide 8
Zm00001d004919	-0.843586	0.000246037	uncharacterized protein		Zm00001d011419	1.54093	0.0030093	Putative cytochrome P450 superfamily protein		Zm00001d007288	-0.552281	1.72443e-06	Acetolactate synthase small subunit 1 chloroplastic
Zm00001d015033	-1.43405	0.000249018	phospholipase D17		Zm00001d053212	1.12738	0.00301888	E3 ubiquitin ligase BIG BROTHER-related		Zm00001d013244	1.92917	1.74233e-06	UDP-glycosyltransferase 83A1
Zm00001d053740	0.905351	0.000249585	Uncharacterised conserved protein UCP015417 vWA		Zm00001d027043	-0.919643	0.00303735	NA		Zm00001d012505	-1.15351	1.74848e-06	Putative WRKY DNA-binding domain superfamily protein
Zm00001d015963	-1.24172	0.000255436	Protein DETOXIFICATION 16		Zm00001d004524	2.75043	0.00303735	NA		Zm00001d026248	1.44494	1.77081e-06	Putative RING zinc finger domain superfamily protein isoform 1/ Putative RING zinc finger domain superfamily protein isoform 2
Zm00001d018490	-0.980177	0.000255901	Pentatricopeptide repeat-containing protein mitochondrial		Zm00001d007445	2.70626	0.0030609	Adagio protein 3		Zm00001d051917	-1.20591	1.82763e-06	Phosphatidylinositol N-acetyglucosaminlytransferase subunit P-related
Zm00001d045264	1.09782	0.000256762	GDSL esterase/lipase		Zm00001d042653	-0.968277	0.00311468	HSP40/DnaJ peptide-binding protein		Zm00001d046952	1.01405	1.83566e-06	Allantoate deiminase
Zm00001d048542	-0.591664	0.000260563	AT-hook motif nuclear-localized protein 14		Zm00001d033055	0.551666	0.00312552	4-coumarate--CoA ligase-like 7		Zm00001d043596	2.09117	1.87102e-06	Lachrymatory-factor synthase
Zm00001d048565	-1.14376	0.000264199	alpha/beta-Hydrolases superfamily protein		Zm00001d040373	3.03292	0.00312552	NA		Zm00001d036001	0.393306	1.89052e-06	Peroxisomal membrane protein 11C
Zm00001d006486	1.5519	0.000264418	Probable protein phosphatase 2C 9		Zm00001d013212	2.45959	0.00315097	Peroxidase 16		Zm00001d004547	1.17862	1.90199e-06	OSJNBa0089E12.13 protein; protein
Zm00001d036780	0.90944	0.000264418	NA		Zm00001d050911	2.13397	0.00318545	NA		Zm00001d028625	-1.10764	1.90917e-06	DOF30 transcription factor
Zm00001d027673	-1.46519	0.000264664	UPF0496 protein		Zm00001d000008	2.99546	0.00319612	Germin-like protein subfamily 1 member 8		Zm00001d049554	-1.08153	1.95143e-06	Putative glycerol-3-phosphate transporter 1
Zm00001d007534	-1.05777	0.000264664	Pentatricopeptide repeat-containing protein mitochondrial		Zm00001d004348	-3.28404	0.00322888	Natterin-4		Zm00001d023769	2.21075	1.95143e-06	Delta(12)-fatty-acid desaturase
Zm00001d013870	-1.4766	0.000266857	NA		Zm00001d015638	-1.33658	0.00322888	NA		Zm00001d049806	2.30586	1.9565e-06	Ubiquitin carboxyl-terminal hydrolase
Zm00001d037107	2.43922	0.000269228	NA		Zm00001d009503	-1.00976	0.00322888	2-oxoglutarate (2OG) and Fe(II)-dependent oxygenase superfamily protein		Zm00001d041855	0.922633	1.98435e-06	OSJNBa0059D20.8 protein; protein
Zm00001d027848	-0.282085	0.000270997	Protoheme IX farnesyltransferase mitochondrial		Zm00001d043211	1.96056	0.00325235	Subtilisin-like serine endopeptidase family protein		Zm00001d048093	-0.889459	2.01532e-06	NA
Zm00001d032162	1.6607	0.000271003	Temperature-induced lipocalin-1		Zm00001d038436	-1.36758	0.00325235	Abscisic acid receptor PYL5		Zm00001d051620	-0.736762	2.01566e-06	AT-hook motif nuclear-localized protein 29
Zm00001d010284	1.01586	0.000274074	Probable carboxylesterase 17		Zm00001d047659	-2.0094	0.00327376	phosphoinositide binding		Zm00001d035230	-1.14438	2.01566e-06	protein; Tyrosine specific protein phosphatase-like
Zm00001d019406	3.7466	0.00027864	Acidic endochitinase		Zm00001d021655	1.75897	0.00328378	WAT1-related protein		Zm00001d001136	3.68169	2.02687e-06	NA
Zm00001d042420	-1.35219	0.000283917	Lipoprotein		Zm00001d017125	-0.94799	0.00329862	Ankyrin repeat family protein		Zm00001d000915	1.22554	2.05643e-06	NA
Zm00001d000199	0.475411	0.000283917	Nicotinamide adenine dinucleotide transporter 1 chloroplastic		Zm00001d024702	1.9257	0.00330234	Tryptophan synthase beta chain 2: chloroplastic		Zm00001d000914	1.22656	2.05657e-06	NA
Zm00001d002919	0.212344	0.000284586	Tetratricopeptide repeat (TPR)-like superfamily protein		Zm00001d033558	-0.541867	0.00330935	Tetratricopeptide repeat (TPR)-like superfamily protein		Zm00001d016714	-1.14583	2.06767e-06	chaperone protein dnaJ-related
Zm00001d037480	-0.859769	0.000286353	Alkaline alpha galactosidase 2		Zm00001d048684	-0.313197	0.00330935	Cysteine-rich receptor-like protein kinase 8		Zm00001d021979	-1.27775	2.08051e-06	interferon-related developmental regulator family protein / IFRD protein family
Zm00001d052785	0.269496	0.000291099	Plant UBX domain-containing protein 11		Zm00001d000294	2.9443	0.00330935	O-succinylhomoserine sulfhydrylase		Zm00001d040002	1.60135	2.09456e-06	Metal tolerance protein 10
Zm00001d003812	-0.504293	0.000292906	Serine/threonine-protein kinase KIPK		Zm00001d051779	-3.99143	0.00331152	Probable aspartyl protease		Zm00001d002884	-1.84655	2.15686e-06	Integral membrane protein
Zm00001d009482	-0.569503	0.000294308	NA		Zm00001d002613	-1.82638	0.0033235	Glucose-methanol-choline (GMC) oxidoreductase family protein		Zm00001d044982	-1.2124	2.19047e-06	Kinesin-like protein KIN-7K chloroplastic
Zm00001d032555	-0.503991	0.000297195	Expressed protein; protein		Zm00001d004762	1.40772	0.0033235	ABC transporter G family member 25		Zm00001d000849	1.12474	2.2287e-06	NA
Zm00001d013105	1.54139	0.00029798	Calcium-dependent protein kinase 20		Zm00001d014516	-0.658196	0.0033235	Probable mitochondrial intermediate peptidase mitochondrial		Zm00001d053586	-1.52855	2.36879e-06	Putative cytochrome P450 superfamily protein
Zm00001d014507	0.598647	0.00029798	Auxin response factor 16		Zm00001d049020	-1.28293	0.00332711	O-methyltransferase ZRP4		Zm00001d019976	-2.43851	2.36879e-06	phosphoglucosamine mutase family protein
Zm00001d032024	-1.52076	0.000300008	myb transcription factor38		Zm00001d040019	1.73691	0.00332711	myb domain protein 62		Zm00001d011562	-1.21174	2.36879e-06	Putative DUF1421 domain family protein
Zm00001d039338	-1.80592	0.000300008	NA		Zm00001d008527	1.09805	0.00332711	NA		Zm00001d018744	-1.30655	2.47183e-06	Putative cyclotide family protein
Zm00001d018326	0.734962	0.000300008	MAP kinase kinase4		Zm00001d051320	0.584461	0.00334492	esterase/lipase/thioesterase family protein		Zm00001d016926	0.94948	2.49268e-06	ATATH13
Zm00001d024889	-0.636078	0.000300008	Zn-finger: RanBP-type: containing protein		Zm00001d046937	-0.785163	0.00334492	Basic leucine zipper 9		Zm00001d013258	2.82859	2.495e-06	Zea mays MADS31
Zm00001d015743	3.28107	0.000301169	Transcription factor HY5		Zm00001d024429	0.793048	0.00334492	CRS2-associated factor 1 mitochondrial		Zm00001d049501	-0.638102	2.66646e-06	N-acetyltransferase
Zm00001d028151	0.848094	0.000301779	Putative polyol transporter 1		Zm00001d053825	-0.622146	0.00339546	Beta-1:3-galactosyltransferase sqv-2		Zm00001d038034	-1.14857	2.66646e-06	NA
Zm00001d004697	-1.23592	0.000302734	IAA27-auxin-responsive Aux/IAA family member		Zm00001d036534	1.23501	0.00342749	Putative phytosulfokine receptor (LRR repeat-containing protein kinase) family protein		Zm00001d048111	-0.794326	2.69883e-06	Plant calmodulin-binding protein-related
Zm00001d033993	-0.427564	0.000303206	DExH-box ATP-dependent RNA helicase DExH16 mitochondrial		Zm00001d025977	1.16278	0.00343067	Metal-nicotianamine transporter YSL2		Zm00001d028199	-1.58868	2.70172e-06	Beta-glucosidase 40
Zm00001d009683	0.32998	0.000303206	Putative DUF1296 domain containing family protein		Zm00001d033606	-0.65949	0.00343684	Protein yippee-like		Zm00001d021699	-1.45716	2.70172e-06	NA
Zm00001d038518	2.79363	0.00030614	Protein SCARECROW		Zm00001d043286	-1.31138	0.00343709	Phosphoglycerate mutase-like family protein		Zm00001d026684	-1.95084	2.75325e-06	C2H2-like zinc finger protein
Zm00001d015239	0.973272	0.000307558	Camelliol C synthase		Zm00001d019555	-0.951318	0.00344032	Two-component response regulator ARR3		Zm00001d049049	0.546459	2.77377e-06	Pyruvate kinase
Zm00001d011125	0.565479	0.000307558	Putative USP family protein		Zm00001d012553	0.518617	0.00345337	octopine synthase binding factor4		Zm00001d053223	0.484453	2.79734e-06	L-ascorbate peroxidase 3 peroxisomal
Zm00001d016408	-1.73525	0.000308608	NA		Zm00001d015984	0.845239	0.00346528	Transcription factor bHLH133		Zm00001d029721	-1.9358	2.83666e-06	Probable serine/threonine-protein kinase
Zm00001d010627	1.04172	0.000310013	Protein LURP-one-related 8		Zm00001d022461	-1.56404	0.00346528	ERF-like protein		Zm00001d002817	-1.30601	2.86365e-06	Kinesin-like protein KIN-7G
Zm00001d022062	-1.36403	0.00031104	NA		Zm00001d003301	2.45652	0.00347221	C2 and GRAM domain-containing protein		Zm00001d035652	1.48113	2.97995e-06	Putative clathrin assembly protein
Zm00001d048524	0.683119	0.00031104	CemA-like proton extrusion protein-related		Zm00001d004731	0.964707	0.00347829	Aldehyde dehydrogenase		Zm00001d005252	-1.49459	3.07897e-06	Leucine-rich repeat receptor-like tyrosine-protein kinase PXC3
Zm00001d023529	-0.836069	0.00031104	abscisic acid stress ripening1		Zm00001d041725	-1.38198	0.00350335	Pollen-specific protein SF3		Zm00001d046422	0.952846	3.11858e-06	Cytochrome P450 734A1
Zm00001d020446	2.76237	0.000311837	NAC (No Apical Meristem) domain transcriptional regulator superfamily protein		Zm00001d014949	-1.57016	0.00350335	RING-H2 finger protein ATL79		Zm00001d014198	1.57873	3.12803e-06	Dof-type zinc finger DNA-binding family protein
Zm00001d030023	1.27003	0.000312027	NAC-transcription factor43		Zm00001d026078	2.90394	0.00350335	F-box protein PP2-A13		Zm00001d023434	-0.674545	3.12803e-06	Rac GTPase activating protein 1
Zm00001d049079	-1.11757	0.000312027	myb domain protein 69		Zm00001d025300	-0.395909	0.00354189	Sucrose nonfermenting 4-like protein		Zm00001d028469	-1.25717	3.15798e-06	NA
Zm00001d002266	0.960007	0.00031248	Lysine-specific histone demethylase 1		Zm00001d017445	0.509438	0.00355542	ELMO/CED-12 family protein		Zm00001d009222	1.6372	3.15798e-06	Pyrophosphate-energized vacuolar membrane proton pump 1
Zm00001d044393	0.294084	0.00031248	Serine/threonine protein phosphatase 2A 55 kDa regulatory subunit B beta isoform		Zm00001d051906	-1.20179	0.00355616	Tumor protein/ Tumor-related protein		Zm00001d052798	-0.942012	3.1676e-06	Homeodomain-like superfamily protein
Zm00001d044373	1.09502	0.000319805	Leucine-rich repeat extensin-like protein 3		Zm00001d011080	2.74079	0.00355616	Protease inhibitor/ Proteinase inhibitor		Zm00001d032555	-0.603958	3.19029e-06	Expressed protein; protein
Zm00001d045711	3.33607	0.000319805	Senescence-specific cysteine protease SAG12		Zm00001d007231	-2.13462	0.00360445	Probable beta-14-xylosyltransferase IRX9		Zm00001d016070	-2.59763	3.19512e-06	phosphate regulatory homolog1
Zm00001d048050	1.9826	0.000319877	Glutamine synthetase3 isoform 1/ Glutamine synthetase3 isoform 2		Zm00001d012378	1.86677	0.00361537	SOUL heme-binding family protein		Zm00001d045030	-2.04079	3.19512e-06	NA
Zm00001d002016	2.60829	0.000322809	Os07g0120600 protein		Zm00001d023411	-0.945093	0.00364042	myb-like transcription factor family protein		Zm00001d018038	1.2952	3.23444e-06	Putative NAC domain-containing protein 94
Zm00001d015347	2.07213	0.000322809	Germin-like protein subfamily 1 member 8		Zm00001d046919	-0.790366	0.00366727	Chloride channel protein CLC-b		Zm00001d030601	-0.451742	3.3093e-06	alpha/beta-Hydrolases superfamily protein
Zm00001d012652	0.260476	0.000322809	Signal recognition particle 54 kDa protein 3		Zm00001d009638	-0.385722	0.00367064	Ketol-acid reductoisomerase chloroplastic		Zm00001d051056	0.992409	3.3093e-06	S-adenosylmethionine decarboxylase proenzyme
Zm00001d028534	0.846517	0.000324528	LAG1 longevity assurance homolog 2		Zm00001d033071	2.47469	0.00370597	Potassium transporter 5		Zm00001d018530	-0.976277	3.3398e-06	Transcription factor TCP21
Zm00001d038484	2.58842	0.00032587	protein kinase-related		Zm00001d005925	0.555996	0.0037094	Glucose-6-phosphate isomerase 1 chloroplastic		Zm00001d029050	-0.814883	3.48398e-06	Serine/threonine-protein kinase AtPK1/AtPK6
Zm00001d033046	0.285104	0.000326816	NagB/RpiA/CoA transferase-like superfamily protein		Zm00001d025797	4.20746	0.00372184	NA		Zm00001d054033	0.443053	3.52779e-06	DNA-directed RNA polymerases IV and V subunit 4
Zm00001d028799	-3.1627	0.000328301	NA		Zm00001d033965	1.17809	0.00373349	Protein WRKY1		Zm00001d046154	2.3679	3.57284e-06	Putative RING zinc finger domain superfamily protein
Zm00001d002111	-0.668411	0.000331126	NA		Zm00001d052027	-0.742222	0.00374782	NA		Zm00001d003059	2.94556	3.58683e-06	Probable low-specificity L-threonine aldolase 1
Zm00001d013821	-0.821048	0.000332651	NA		Zm00001d048890	1.10003	0.00377796	Acyl-coenzyme A oxidase		Zm00001d014272	-0.578174	3.58683e-06	NA
Zm00001d013995	-1.91922	0.000332651	Peptide-N4-(N-acetyl-beta-glucosaminyl)asparagine amidase A protein		Zm00001d040220	-1.24964	0.00378592	Enolase-phosphatase E1		Zm00001d037034	0.379208	3.58683e-06	PHD finger protein-related
Zm00001d051135	0.553133	0.000332997	Putative casein kinase family protein		Zm00001d012614	-3.90617	0.00380716	Cyclic nucleotide-gated ion channel 4		Zm00001d052540	-0.708916	3.64542e-06	Pentatricopeptide repeat-containing protein mitochondrial
Zm00001d006511	1.75032	0.000332997	Glucose-6-phosphate/phosphate translocator 2 chloroplastic		Zm00001d042978	-1.11089	0.00383372	Pentatricopeptide repeat-containing protein chloroplastic		Zm00001d013431	-0.953095	3.64542e-06	Ubiquitin-conjugating enzyme E2 variant 1A
Zm00001d001871	1.32753	0.000333486	NA		Zm00001d049427	2.13403	0.00386312	Germin-like protein subfamily 1 member 8		Zm00001d043652	1.17609	3.68671e-06	Probable choline kinase 2
Zm00001d003446	1.06712	0.000336701	Gamma-glutamyltranspeptidase 1		Zm00001d038740	-1.21063	0.003867	NA		Zm00001d031203	1.37965	3.70171e-06	alpha/beta-Hydrolases superfamily protein
Zm00001d049661	-0.715218	0.000337953	AT-hook motif nuclear-localized protein 1		Zm00001d026404	2.87779	0.00386996	NA		Zm00001d035889	0.438825	3.74924e-06	Protein transport protein SEC16B homolog
Zm00001d032643	-1.41467	0.000338364	NA		Zm00001d029892	1.60171	0.00387374	Metalloendoproteinase 1-MMP		Zm00001d024421	0.752874	3.78226e-06	Phosphopantothenate--cysteine ligase 1
Zm00001d029047	0.546901	0.0003422	Receptor-like protein kinase FERONIA		Zm00001d046834	-2.46596	0.00388491	Low temperature and salt responsive protein		Zm00001d011237	2.88835	3.8644e-06	Putative WRKY DNA-binding domain superfamily protein
Zm00001d006823	-1.28062	0.000342697	Peptide transporter PTR2		Zm00001d045124	2.67323	0.00394972	Protein kinase superfamily protein with octicosapeptide/Phox/Bem1p domain		Zm00001d024572	-1.03739	3.91965e-06	Putative glycerol-3-phosphate transporter 1
Zm00001d000224	1.05664	0.000342722	F-box protein SKP2A		Zm00001d042558	0.93829	0.00398034	TPR repeat-containing protein ZIP4		Zm00001d019243	-3.87675	4.00138e-06	NA
Zm00001d030942	-0.668992	0.000342903	WAK-like kinase		Zm00001d000608	-1.69018	0.00398374	NA		Zm00001d033284	-1.37598	4.02678e-06	WAT1-related protein
Zm00001d052969	3.88912	0.000345696	Putative cytochrome P450 superfamily protein		Zm00001d013035	1.03699	0.00402081	Cycloartenol-C-24-methyltransferase		Zm00001d034941	0.283467	4.04792e-06	Ypt/Rab-GAP domain of gyp1p superfamily protein
Zm00001d013397	0.44305	0.000350267	Fb27		Zm00001d002338	-0.965003	0.00404908	UDP-N-acetylglucosamine diphosphorylase 2		Zm00001d021505	-0.478363	4.09583e-06	Spindle and kinetochore-associated protein 1 homolog
Zm00001d003309	-0.947603	0.000351821	Copper amine oxidase family protein		Zm00001d024049	-1.1433	0.00409264	NA		Zm00001d020069	-1.85125	4.09695e-06	Carotenoid cleavage dioxygenase
Zm00001d005193	-0.836154	0.000354966	Protein LURP1		Zm00001d043468	-0.408468	0.00414416	trehalose-6-phosphate synthase6		Zm00001d014689	-0.540625	4.1825e-06	L-arabinokinase
Zm00001d041346	-0.395328	0.000356543	Cytoplasmic tRNA 2-thiolation protein 2		Zm00001d023402	-1.26209	0.00414416	Putative MYB DNA-binding domain superfamily protein		Zm00001d049019	0.908928	4.19503e-06	Ankyrin repeat protein SKIP35
Zm00001d019297	-0.765862	0.000358364	Pentatricopeptide repeat-containing protein		Zm00001d043970	1.55049	0.00417558	NA		Zm00001d012895	-1.01964	4.24802e-06	DUF4378 domain protein
Zm00001d022154	-1.3314	0.000359446	RING-H2 finger protein ATL3		Zm00001d021897	2.54667	0.00421912	L-type lectin-domain containing receptor kinase V.9		Zm00001d033496	1.55287	4.27783e-06	nicotianamine synthase 3
Zm00001d029572	1.01109	0.000362881	zinc finger (C3HC4-type RING finger) family protein		Zm00001d047077	2.76305	0.00421912	Beta-amylase 3 chloroplastic		zma-MIR172d	1.93094	4.27783e-06	NA
Zm00001d031168	-0.653453	0.000362881	Glycine-rich RNA-binding protein 2		Zm00001d025584	0.445942	0.00421912	DNAJ heat shock N-terminal domain-containing protein		ENSRNA049997433	1.93094	4.27783e-06	NA
Zm00001d051823	-0.44301	0.000362881	NA		Zm00001d032947	1.18868	0.0042206	Chitinase 1		Zm00001d050039	-1.81501	4.30599e-06	Putative NAC domain transcription factor superfamily protein
Zm00001d015216	4.24976	0.000362881	Salicylate/benzoate carboxyl methyltransferase		Zm00001d018184	-3.78807	0.00436335	flavonol synthase1		Zm00001d006753	1.45105	4.40879e-06	Indole-3-acetic acid amido synthetase
Zm00001d012156	0.36839	0.000362881	Sister chromatid cohesion 1 protein 4		Zm00001d008578	1.3862	0.00436335	Putative WRKY DNA-binding domain superfamily protein		Zm00001d018871	1.13064	4.49163e-06	C2 calcium/lipid-binding plant phosphoribosyltransferase family protein
Zm00001d047476	0.65414	0.000362881	Probable E3 ubiquitin-protein ligase RHC1A		Zm00001d048232	2.77692	0.00438078	Purine permease 3		Zm00001d040248	3.1304	4.56284e-06	Laccase-7
Zm00001d051061	-0.274819	0.000366774	Enhancer of rudimentary homolog		Zm00001d021557	0.413172	0.00440985	Casein kinase II subunit beta-1		Zm00001d002738	2.32408	4.61664e-06	Probable aquaporin TIP2-2
Zm00001d007692	0.351845	0.000366774	Auxilin-related protein 1		Zm00001d022116	-3.73956	0.00440985	Scarecrow-like protein 29		Zm00001d039924	1.43706	4.64071e-06	NA
Zm00001d045537	-0.851942	0.000370676	CYCLOPS		Zm00001d033366	0.537683	0.004427	NA		Zm00001d009637	3.46229	4.6579e-06	NA
Zm00001d027022	-1.98957	0.000372286	NA		Zm00001d041634	0.812097	0.00443825	NA		Zm00001d035552	0.635593	4.67199e-06	Serine/arginine-rich splicing factor RS2Z32
Zm00001d019039	-0.374066	0.000374055	SHL1		Zm00001d014016	1.59947	0.00445737	Cytokinin riboside 5'-monophosphate phosphoribohydrolase LOG3		Zm00001d011061	-0.427832	4.72772e-06	Pectin acetylesterase 5
Zm00001d017087	-1.36693	0.000374525	V-type proton ATPase subunit E3		Zm00001d043566	-0.378499	0.00452804	Protein STICHEL-like 3		Zm00001d040519	0.931424	4.75945e-06	Germin-like protein subfamily 2 member 1
Zm00001d051336	0.638938	0.000382835	Ras-related protein RABD2c		Zm00001d007329	2.0522	0.00453048	Probable WRKY transcription factor 75		Zm00001d051656	-0.703462	4.77988e-06	NA
Zm00001d038676	0.505448	0.000385808	Probable xyloglucan glycosyltransferase 12		Zm00001d043840	-0.334079	0.00453048	Origin recognition complex subunit 4		Zm00001d039942	-2.16794	4.79274e-06	17.4 kDa class I heat shock protein
Zm00001d025920	-0.954984	0.000387192	Putative lectin-like receptor protein kinase family protein		Zm00001d033062	-2.78992	0.00453112	Transparent testa 12 protein		Zm00001d002325	0.765123	4.81917e-06	NA
Zm00001d043551	0.59443	0.000388233	dehydrin6		Zm00001d025574	0.776526	0.00453112	Probable plastid-lipid-associated protein 2 chloroplastic		Zm00001d006663	-1.82696	4.84198e-06	light harvesting complex A1
Zm00001d018011	-0.986897	0.000388233	Lecithin-cholesterol acyltransferase-like 4		Zm00001d006486	-1.76079	0.00457757	Probable protein phosphatase 2C 9		Zm00001d026017	2.82069	4.8886e-06	Protein REVEILLE 1
Zm00001d030010	-0.385139	0.000389409	NA		Zm00001d008212	0.435436	0.00458761	NA		Zm00001d049493	-0.564827	4.92526e-06	FAR1-domain family sequence
Zm00001d005324	-1.18326	0.000391035	U-box domain-containing protein 33		Zm00001d006651	-0.839496	0.00459645	Tubulin alpha-5 chain		Zm00001d014742	0.423154	4.92526e-06	F-box protein SKIP31
Zm00001d044132	-1.68166	0.000394721	Aspartic proteinase A1		Zm00001d043592	-2.88896	0.00459645	SPA1-related 3		Zm00001d043762	1.2746	4.95013e-06	ABC transporter B family member 9
Zm00001d002015	3.08878	0.000394746	Os07g0120600 protein		Zm00001d045390	-3.93696	0.00459645	early nodulin-related		Zm00001d044504	4.11727	4.95013e-06	High affinity nitrate transporter 2.7
Zm00001d011927	-0.614099	0.000395154	Phospholipid/glycerol acyltransferase family protein		Zm00001d021048	-2.77881	0.00460319	Nucleotide-diphospho-sugar transferase family protein		Zm00001d005620	2.44617	4.98176e-06	UDP-glycosyltransferase 82A1
Zm00001d040238	0.758459	0.000395196	Probable uridine nucleosidase 2		Zm00001d004366	1.4458	0.00465722	UDP-glycosyltransferase 74B1		Zm00001d017618	1.39414	5.15666e-06	B3 domain-containing transcription factor NGA2
Zm00001d037080	-1.17409	0.000395196	Putative leucine-rich repeat receptor-like protein kinase family protein		Zm00001d005629	-1.9626	0.00465722	Sulfite exporter TauE/SafE family protein		Zm00001d044747	-0.684873	5.26291e-06	B12D protein
Zm00001d026513	-1.67976	0.000395196	Heavy metal transport/detoxification superfamily protein		Zm00001d046921	-0.907744	0.00469237	F-box protein AFR		Zm00001d030894	-1.01484	5.29036e-06	Cyclin-D5-1
Zm00001d048693	2.27544	0.000397319	ATA15 protein		Zm00001d016009	1.84846	0.00470073	L-type lectin-domain containing receptor kinase V.9		Zm00001d053409	-1.16582	5.29036e-06	UPF0481 protein
Zm00001d037704	2.13234	0.000398681	alpha/beta-Hydrolases superfamily protein		Zm00001d017420	0.779935	0.00470073	GT-2-like 1		Zm00001d043180	-1.14688	5.29036e-06	EID1-like F-box protein 3
Zm00001d019447	-0.51129	0.000399223	NA		Zm00001d005767	-0.872594	0.00472668	DNA glycosylase superfamily protein		Zm00001d025903	0.705533	5.29355e-06	Endosomal targeting BRO1-like domain-containing protein
Zm00001d039312	-0.984323	0.000402206	non-yellow coloring1		Zm00001d005373	0.457504	0.0048246	Chaperonin 60 subunit alpha 2 chloroplastic		Zm00001d038692	-2.18293	5.37396e-06	NA
Zm00001d002377	-0.746233	0.000411519	Galactokinase		Zm00001d005654	1.67334	0.00482705	NA		Zm00001d040373	3.03669	5.71891e-06	NA
Zm00001d017754	0.230901	0.000412478	yeast YAK1-related gene 1		Zm00001d048789	1.71569	0.00486234	NA		Zm00001d005479	-1.29575	5.76903e-06	Metal transporter Nramp6
Zm00001d027943	-0.520931	0.000413877	alpha/beta-Hydrolases superfamily protein		Zm00001d035363	-2.371	0.004865	NA		Zm00001d002479	2.06351	5.84683e-06	S-norcoclaurine synthase
Zm00001d051915	0.85012	0.000414084	ABC(yeast) homolog1		Zm00001d043283	-1.30482	0.00486855	Phosphoglycerate mutase-like family protein		Zm00001d038371	-1.66566	5.96229e-06	Putative laccase family protein
Zm00001d014003	-0.70928	0.000417188	RING/U-box superfamily protein		Zm00001d046595	-0.556557	0.00486855	Putative sucrose-phosphate synthase family protein		Zm00001d013151	2.01993	5.96983e-06	Transcription factor JUNGBRUNNEN 1
Zm00001d045031	-1.56479	0.000417188	NA		Zm00001d020500	1.83508	0.00487913	NA		Zm00001d019270	3.3916	5.97137e-06	Pectinesterase inhibitor
Zm00001d044542	-0.847921	0.000419979	NA		Zm00001d047984	-2.377	0.00487913	Peroxidase 53		Zm00001d047174	0.482279	5.98147e-06	Polypyrimidine tract-binding protein homolog 1
Zm00001d024606	-0.418322	0.000422532	NA		Zm00001d051674	-0.563148	0.00490893	Phosphatidylinositol/phosphatidylcholine transfer protein SFH13		Zm00001d052010	-1.41249	5.98362e-06	Calcineurin subunit B
Zm00001d023990	2.7554	0.000428224	Putative alcohol dehydrogenase superfamily protein		Zm00001d006531	2.85802	0.00490893	NA		Zm00001d021320	1.55646	5.98362e-06	Sialyltransferase-like protein 1
Zm00001d012953	1.27966	0.000429066	Protein NRT1/ PTR FAMILY 5.6		Zm00001d020557	-2.39093	0.00490893	Glossy1		Zm00001d018904	0.291761	6.03997e-06	protein kinase-related
Zm00001d032994	-0.404541	0.000430173	Probable mannan synthase 7		Zm00001d016733	-2.02695	0.00491745	NDR1/HIN1-like 1		Zm00001d028365	-0.896304	6.05317e-06	Cyclin-J18
Zm00001d004733	-0.637339	0.000444996	NA		Zm00001d018699	0.860197	0.00491745	NA		Zm00001d038146	1.11963	6.05488e-06	Oxidoreductase: 2OG-Fe oxygenase family protein
Zm00001d043902	0.623733	0.000444996	sequence-specific DNA binding transcription factors		Zm00001d046499	0.972811	0.00492817	DNA binding;DNA-directed RNA polymerases		Zm00001d051872	1.78227	6.1009e-06	Aquaporin PIP1-5
Zm00001d025724	-1.2321	0.000447203	Acid phosphatase/vanadium-dependent haloperoxidase protein		Zm00001d028307	1.76956	0.00493045	Probable inactive poly		Zm00001d009181	-0.904666	6.1009e-06	Serine/threonine-protein phosphatase
Zm00001d028704	0.744112	0.00044944	Thioredoxin-like protein AAED1 chloroplastic		Zm00001d002275	0.485479	0.00493045	ABC transporter C family member 2		Zm00001d053313	1.2793	6.10198e-06	Protein phosphatase 2C and cyclic nucleotide-binding/kinase domain-containing protein
Zm00001d043880	-1.16847	0.000454381	NA		Zm00001d032858	2.42587	0.00493329	kaurene synthase1		Zm00001d047192	3.3838	6.1176e-06	5-pentadecatrienyl resorcinol O-methyltransferase
Zm00001d046667	1.04656	0.000455627	NA		Zm00001d048711	-4.09085	0.00493329	Hydroquinone glucosyltransferase		Zm00001d027673	-1.70763	6.20285e-06	UPF0496 protein
Zm00001d036541	-0.829643	0.000461065	maize insect resistance2		Zm00001d011527	0.976438	0.00493329	Probable WRKY transcription factor 71		Zm00001d048908	0.769634	6.20285e-06	RING/FYVE/PHD zinc finger superfamily protein
Zm00001d026311	0.843006	0.000461065	NAD(P)-binding Rossmann-fold superfamily protein		Zm00001d039459	1.99362	0.00494	Putative transcription factor bHLH041		Zm00001d005889	-4.21042	6.20285e-06	abscisic acid 8'-hydroxylase5
Zm00001d051114	-1.57896	0.000463996	PseudoARR-B transcription factor/ Two-component response regulator-like PRR1		Zm00001d027345	0.686038	0.00494219	Mitochondrial import inner membrane translocase subunit TIM23-3		Zm00001d010314	1.76444	6.20285e-06	NA
Zm00001d023477	-0.727059	0.000469934	NA		Zm00001d029506	-1.0707	0.00494219	LOB domain-containing protein 42		Zm00001d038773	-0.852226	6.20285e-06	Pentatricopeptide repeat-containing protein
Zm00001d026672	-0.355958	0.000478371	Pentatricopeptide repeat-containing protein		Zm00001d031204	1.01506	0.00494219	alpha/beta-Hydrolases superfamily protein		Zm00001d049638	0.937622	6.46222e-06	Transcription factor GTE8
Zm00001d034920	-2.84941	0.000481464	Ethylene-responsive transcription factor 1B		Zm00001d032172	-0.475371	0.00494219	ATP-dependent 6-phosphofructokinase 5 chloroplastic		Zm00001d041514	-1.53105	6.52997e-06	NA
Zm00001d006233	-1.879	0.000481464	Lung seven transmembrane receptor family protein		Zm00001d032430	-0.596044	0.00494219	Mitochondrial arginine transporter BAC1		Zm00001d003353	1.49587	6.54123e-06	Copper transport protein family
Zm00001d014278	0.357874	0.000481669	Ras-related protein RABA4a		Zm00001d033782	3.16341	0.00494219	Seed maturation protein PM41		Zm00001d029950	-1.35157	6.59419e-06	Putative membrane lipoprotein
Zm00001d045557	0.764376	0.000481669	Putative cellulose synthase-like family protein		Zm00001d048608	-1.89402	0.00494219	Putative DUF231 domain containing family protein		Zm00001d048898	1.42159	6.60599e-06	F-box/kelch-repeat protein SKIP11
Zm00001d002163	1.00869	0.000482513	Diacylglycerol kinase 5		Zm00001d013573	-1.0754	0.00494219	Glucan endo-13-beta-glucosidase 7		Zm00001d049380	1.01544	6.60599e-06	Putative aminotransferase class III superfamily protein
Zm00001d000909	-1.5161	0.000486229	NA		Zm00001d048444	-1.43076	0.00494219	Protein SULFUR DEFICIENCY-INDUCED 1		Zm00001d019142	0.493821	6.60599e-06	Late embryogenesis abundant (LEA) hydroxyproline-rich glycoprotein family
Zm00001d043278	1.90956	0.000486854	Protein UPSTREAM OF FLC		Zm00001d008819	1.43588	0.00496584	IQ-domain 25		Zm00001d038035	-0.935873	6.60599e-06	ADPATP carrier protein 1 chloroplastic
Zm00001d018595	-0.823881	0.000486854	Sulfoquinovosyl transferase SQD2		Zm00001d027305	2.99273	0.00499579	Silicon transporter		Zm00001d045321	3.18203	6.61816e-06	Dehydrin family protein expressed; Embryogenic-cell protein 40 (Ecp40); protein
Zm00001d053936	0.93382	0.000489408	Polyketide cyclase/dehydrase and lipid transport superfamily protein		Zm00001d006238	-0.570606	0.00499579	Calcium lipid binding protein-like		Zm00001d017461	1.25068	6.61969e-06	NA
Zm00001d036077	-0.408829	0.000490459	NA		Zm00001d012982	-1.22375	0.00499579	NAD(P)-binding Rossmann-fold superfamily protein		Zm00001d015616	1.48623	6.63246e-06	Leucine zipper protein-like; protein
Zm00001d044747	-0.567063	0.000490459	B12D protein		Zm00001d021818	2.55873	0.00499579	NAC transcription factor 25		Zm00001d050395	0.303546	6.6823e-06	GDT1-like protein 4
Zm00001d049822	-0.914998	0.000491077	teosinte glume architecture1		Zm00001d023768	2.5084	0.00499795	Delta(12)-fatty-acid desaturase		Zm00001d043592	-3.30368	6.76905e-06	SPA1-related 3
Zm00001d044243	0.457982	0.000491968	3'-5' exonuclease domain-containing protein / K homology domain-containing protein / KH domain-containing protein		Zm00001d047247	-1.91015	0.00500546	Putative RING zinc finger domain superfamily protein		Zm00001d037807	0.393034	6.76905e-06	Transcription factor IIA alpha/beta subunit
Zm00001d049232	-0.959213	0.000494368	UV-B-induced protein chloroplastic		Zm00001d005251	1.53335	0.00505251	NAD(P)H dehydrogenase (quinone) FQR1		Zm00001d031811	1.68718	6.79064e-06	Patatin-like protein 2
Zm00001d016857	-1.64649	0.00049485	Zea mays ARGOS7		Zm00001d014335	1.78656	0.00505251	cytochrome P450 family 87 subfamily A polypeptide 6		Zm00001d035759	-1.67726	6.97772e-06	uncharacterized protein
Zm00001d002864	0.549566	0.000502254	Probable polyol transporter 4		Zm00001d012024	2.8897	0.00512444	Nucleotide-diphospho-sugar transferase family protein		Zm00001d044757	0.413735	7.13343e-06	Dynamin-2A
Zm00001d003902	-0.495934	0.000503199	Polynucleotide adenylyltransferase family protein		Zm00001d052744	2.12889	0.00514843	Lipopolysaccharide-modifying protein		Zm00001d015059	-1.49405	7.15466e-06	UTP:RNA uridylyltransferase 1
Zm00001d048219	1.00531	0.000504489	RmlC-like cupins superfamily protein		Zm00001d051656	-0.631472	0.00520798	NA		Zm00001d019282	-0.453217	7.24671e-06	Pectin lyase-like superfamily protein
Zm00001d027856	0.550778	0.000510138	Kelch motif family protein		Zm00001d024268	1.42737	0.00520798	NAC domain-containing protein 21/22		Zm00001d044662	2.40242	7.39857e-06	ZHD9 ZF-HD type transcription factor
Zm00001d032530	0.35743	0.000510138	F-box/LRR-repeat protein		Zm00001d054057	3.12473	0.00522589	nitrate transport2		zma-MIR399h	-4.89927	7.57683e-06	NA
Zm00001d022997	-1.6516	0.000510138	NA		Zm00001d043586	2.24728	0.0052447	NA		ENSRNA049997333	-4.89927	7.57683e-06	NA
Zm00001d053759	-0.453492	0.000516413	NA		Zm00001d043550	-1.92944	0.00535675	RING-H2 finger protein ATL67		Zm00001d017441	-1.12129	7.57683e-06	Cyclin-U4-2
Zm00001d007571	0.838759	0.000516413	Probable galacturonosyltransferase 6		Zm00001d010381	0.555826	0.00535675	NA		Zm00001d001811	0.79242	7.75347e-06	Tetraspanin-19
Zm00001d050026	-0.770412	0.000518126	purple acid phosphatase 23		Zm00001d006633	3.0044	0.00537482	GDSL esterase/lipase		Zm00001d005920	1.21274	7.86243e-06	carbonic anhydrase4
Zm00001d017294	1.5846	0.000520604	gibberellin 2-oxidase4		Zm00001d033079	-2.27178	0.00540055	GDSL esterase/lipase		Zm00001d027824	1.9622	8.12281e-06	NA
Zm00001d053610	0.348307	0.000520977	Putative ARF GTPase-activating domain family protein isoform 1/ Putative ARF GTPase-activating domain family protein isoform 2		Zm00001d029978	0.512022	0.00551207	Casein kinase II subunit beta-1		Zm00001d018352	-4.24143	8.18454e-06	Protein kinase superfamily protein
Zm00001d001936	1.17194	0.000520977	Myb family transcription factor PHL5		Zm00001d013263	-1.03691	0.00555557	Expressed protein; protein		Zm00001d003070	1.71513	8.18614e-06	Protein kinase superfamily protein
Zm00001d018339	0.356243	0.000520977	Cyclic nucleotide-gated ion channel 17		Zm00001d030848	5.18035	0.0055833	BAG domain containing protein expressed; protein		Zm00001d026266	-1.95049	8.29814e-06	Probable nucleoredoxin 3
Zm00001d035064	-0.826841	0.000520977	HXXXD-type acyl-transferase family protein		Zm00001d053014	0.5556	0.0055833	CBS domain-containing protein CBSCBSPB2		Zm00001d038695	-4.3481	8.48277e-06	gibberellin 2-oxidase7
Zm00001d012551	0.902143	0.00052182	NA		Zm00001d045570	-2.10378	0.0055833	Glycerolphosphate mutase		Zm00001d025868	-1.95458	8.54517e-06	Cytokinin riboside 5'-monophosphate phosphoribohydrolase LOG3
Zm00001d028894	0.281448	0.000521942	Ubiquitin-conjugating enzyme E2 32		Zm00001d025932	-0.83072	0.0055833	Remorin		Zm00001d016823	-1.96527	8.68272e-06	NA
Zm00001d010319	-0.746539	0.000522155	cytochrome P450 family 721 subfamily A polypeptide 1		Zm00001d005453	-0.424666	0.00560847	heteroglycan glucosidase 1		Zm00001d018470	1.27382	8.96656e-06	Carboxyl-terminal-processing peptidase 2 chloroplastic
Zm00001d028366	-1.05578	0.000522436	Type IV inositol polyphosphate 5-phosphatase 9		Zm00001d040517	2.12883	0.00560847	Vegetative cell wall protein gp1		Zm00001d009927	1.28086	8.96656e-06	oxidoreductase 2OG-Fe(II) oxygenase family protein
Zm00001d045388	-2.57435	0.000522436	Putative D-mannose binding lectin receptor-like protein kinase family protein		Zm00001d032146	-0.917455	0.00561755	Calcineurin subunit B		Zm00001d042490	-0.959844	9.09943e-06	Glycosyltransferase
Zm00001d001079	-0.423934	0.000528785	NA		Zm00001d037771	0.612495	0.00563889	Transcription factor bHLH133		Zm00001d025508	-2.57627	9.19449e-06	Class IV heat shock protein
Zm00001d012049	0.422666	0.00053179	Zinc finger CCCH domain-containing protein 33		Zm00001d032306	0.954225	0.00576061	NA		Zm00001d025145	2.42206	9.30395e-06	NA
Zm00001d013289	-1.47904	0.000531921	Transmembrane BAX inhibitor motif-containing protein 4		Zm00001d038989	1.90046	0.00576133	Rop guanine nucleotide exchange factor 9		Zm00001d023715	1.17615	9.60036e-06	Melibiase family protein
Zm00001d036001	0.311411	0.000531921	Peroxisomal membrane protein 11C		Zm00001d006440	0.308824	0.00579252	Casein kinase II subunit beta-1		Zm00001d045778	-1.52419	9.63588e-06	Embryogeneis transmembrane protein
Zm00001d034852	-0.770435	0.00053609	F3H9.20 protein		Zm00001d010586	3.27268	0.00580575	PEBP (phosphatidylethanolamine-binding protein) family protein		Zm00001d002614	1.59016	9.70864e-06	SPX domain-containing membrane protein
Zm00001d029892	-1.43691	0.000537094	Metalloendoproteinase 1-MMP		Zm00001d026160	-5.21167	0.00580575	Cortical cell-delineating protein/ ZmGR1b protein		Zm00001d019039	-0.434905	9.76667e-06	SHL1
Zm00001d020265	1.33853	0.000538122	Chaperone protein dnaJ 20 chloroplastic		Zm00001d028548	2.94946	0.00582525	maternal effect embryo arrest 59		Zm00001d045570	-2.3488	9.77626e-06	Glycerolphosphate mutase
Zm00001d007446	0.560109	0.0005406	14-3-3-like protein		Zm00001d017412	-1.9558	0.00584689	B-box zinc finger protein 20		Zm00001d030748	-1.02051	9.80549e-06	NA
Zm00001d028368	-0.849795	0.000546128	Purple acid phosphatase 1		Zm00001d031749	-1.02293	0.00587266	Pyridoxal phosphate (PLP)-dependent transferases superfamily protein		Zm00001d020651	-1.7755	9.86387e-06	Plant viral-response family protein
Zm00001d046837	1.4309	0.000546516	NA		Zm00001d042293	-1.77812	0.00587266	L-type lectin-domain containing receptor kinase IX.1		Zm00001d002757	-1.54333	9.95611e-06	Protein kinase superfamily protein
Zm00001d024930	-4.18873	0.000550087	NA		Zm00001d015356	1.72525	0.00589217	4-hydroxyphenylpyruvate dioxygenase 1		Zm00001d032239	-0.631728	1.01669e-05	high mobility group family A 102
Zm00001d005441	-0.516751	0.000557093	NA		Zm00001d052139	-2.72753	0.00589647	Nitrate reductase		Zm00001d025342	-0.886788	1.03477e-05	Serine/threonine-protein kinase KIPK
Zm00001d018218	-0.591226	0.000557093	N-acetyltransferase		Zm00001d006384	0.442451	0.00589647	lipid transporters		Zm00001d007832	-1.81455	1.04275e-05	Bifunctional inhibitor/lipid-transfer protein/seed storage 2S albumin superfamily protein
Zm00001d039694	-0.782844	0.000558514	ramosa2		Zm00001d026673	4.29194	0.00589647	NA		Zm00001d032306	0.989201	1.0544e-05	NA
Zm00001d021711	-1.2409	0.000558514	NA		Zm00001d002739	-0.796361	0.00592934	Polyketide cyclase/dehydrase and lipid transport superfamily protein		Zm00001d019409	2.74062	1.06413e-05	OSJNBb0004G23.8 protein; OSJNBb0085F13.3 protein
Zm00001d022092	-1.23734	0.000558514	Cytosolic sulfotransferase 17		Zm00001d006231	-1.12577	0.00592934	PLC-like phosphodiesterases superfamily protein		Zm00001d038036	-1.16982	1.06413e-05	ribonuclease P family protein
Zm00001d001979	0.456177	0.000562775	Probable UDP-arabinopyranose mutase 5		Zm00001d037937	0.567311	0.00592934	DUF538 family protein		Zm00001d028413	-1.46685	1.07219e-05	LOB domain-containing protein 31
Zm00001d053003	0.201133	0.000566279	ARM repeat superfamily protein		Zm00001d018352	-3.532	0.00594257	Protein kinase superfamily protein		Zm00001d030345	-1.50469	1.07219e-05	NA
Zm00001d004705	-2.15604	0.000566279	Amino acid permease 2		Zm00001d012574	-1.86041	0.00595569	Probable inactive purple acid phosphatase 1		Zm00001d020025	1.51572	1.10283e-05	NA
Zm00001d027544	-0.501535	0.000569778	Ankyrin repeat protein		Zm00001d038542	-0.815699	0.00597348	NA		Zm00001d048736	4.34031	1.10591e-05	S-alkyl-thiohydroximate lyase SUR1
Zm00001d013030	-0.46015	0.00057111	Calcium-dependent protein kinase 7		Zm00001d023580	-1.08687	0.00597348	Aldehyde dehydrogenase		Zm00001d037278	-0.737482	1.10591e-05	phosphofructose kinase1
Zm00001d018906	-0.768087	0.000572355	NA		Zm00001d047764	-1.22235	0.00608632	Expressed protein; protein		Zm00001d027324	0.323479	1.11772e-05	THO complex subunit 1
Zm00001d002057	3.13006	0.000573526	Ripening-related protein 3		Zm00001d019472	-0.516282	0.00609462	Calcium-dependent lipid-binding (CaLB domain) family protein		Zm00001d027425	0.809564	1.11772e-05	agamous-like6
Zm00001d036084	0.391088	0.000573526	ER-derived vesicles protein ERV14/ ER-derived vesicles protein ERV14 isoform 1/ ER-derived vesicles protein ERV14 isoform 2		Zm00001d008548	3.51122	0.00609462	Bowman-Birk type wound-induced proteinase inhibitor WIP1		Zm00001d018150	-1.95283	1.12348e-05	NA
Zm00001d015853	-0.69227	0.000574341	Leucine-rich repeat receptor protein kinase EMS1		Zm00001d035759	-1.50134	0.00609462	uncharacterized protein		Zm00001d018184	-4.47341	1.1336e-05	flavonol synthase1
Zm00001d049096	-1.69603	0.000579389	NA		Zm00001d051842	1.4558	0.0060971	Zn-dependent hydrolase: including glyoxylase		Zm00001d024470	1.5537	1.14487e-05	DNA-directed RNA polymerase
Zm00001d037420	-0.797656	0.000583142	BTB/POZ domain-containing protein		Zm00001d037610	1.3817	0.0060971	NA		Zm00001d011080	2.80034	1.15219e-05	Protease inhibitor/ Proteinase inhibitor
Zm00001d033862	1.22773	0.000584421	1-aminocyclopropane-1-carboxylate synthase6		Zm00001d012121	0.378677	0.00610876	Tetratricopeptide repeat (TPR)-like superfamily protein		Zm00001d033645	0.43654	1.17301e-05	Phosphatidylinositol 4-phosphate 5-kinase 8
Zm00001d030953	0.316349	0.000586434	Zinc ion binding protein		Zm00001d031539	-0.515586	0.00611815	S-adenosyl-L-methionine-dependent methyltransferases superfamily protein		Zm00001d041725	-1.40926	1.20853e-05	Pollen-specific protein SF3
Zm00001d045804	-1.10533	0.000591014	Zinc finger protein CONSTANS-LIKE 9		Zm00001d033211	-0.63939	0.00614797	Calmodulin binding protein		Zm00001d014903	0.602186	1.21623e-05	Phospholipase C
Zm00001d045953	0.37125	0.00059419	tRNA(adenine(34)) deaminase chloroplastic		Zm00001d041138	-0.363093	0.00621169	Exocyst complex component SEC10		Zm00001d034182	-3.15833	1.24152e-05	NA
Zm00001d005687	-1.88812	0.000598584	trehalose-6-phosphate synthase5		Zm00001d018460	-0.483205	0.00621543	leunig-related2		Zm00001d035377	3.28325	1.25923e-05	IQ domain-containing protein IQM3
Zm00001d017284	0.978624	0.000598584	Auxin response factor 16		Zm00001d011126	1.24608	0.00623695	NA		Zm00001d042433	-0.769576	1.26066e-05	Histone deacetylase HDT1
Zm00001d028691	-0.346282	0.000602355	Expressed protein; protein		Zm00001d001772	-0.846494	0.00630879	Protein YLS9		Zm00001d042499	1.25874	1.27392e-05	Probable methyltransferase PMT19
Zm00001d032279	0.546692	0.000604157	ABC2 homolog 15		Zm00001d024338	0.489299	0.00635224	Protein kinase superfamily protein		Zm00001d008190	1.20006	1.28965e-05	Probable WRKY transcription factor 47
Zm00001d045713	3.23167	0.000609649	Senescence-specific cysteine protease SAG12		Zm00001d017441	-1.02145	0.00635932	Cyclin-U4-2		Zm00001d045086	1.30386	1.28965e-05	Putative leucine-rich repeat receptor-like protein kinase family protein
Zm00001d007912	-0.370402	0.000609861	Calcium-dependent protein kinase 20		Zm00001d041418	-1.08412	0.0063705	Auxin-responsive protein IAA4		Zm00001d008646	0.62323	1.29165e-05	Protein PHLOEM PROTEIN 2-LIKE A2
Zm00001d038127	0.545628	0.000613157	Probable E3 ubiquitin-protein ligase LUL4		Zm00001d002867	1.08256	0.00638074	Ethylene-responsive transcription factor ERF053		Zm00001d034095	2.47184	1.31849e-05	cytochrome P450 family 81 subfamily D polypeptide 8
Zm00001d025310	-1.36692	0.000615181	Putative RING zinc finger domain superfamily protein		Zm00001d012452	-1.22663	0.00638074	Protein kinase superfamily protein		Zm00001d007850	3.12953	1.31849e-05	Transcription factor JUNGBRUNNEN 1
Zm00001d025860	0.766964	0.000617752	NA		Zm00001d048898	1.29129	0.00641218	F-box/kelch-repeat protein SKIP11		Zm00001d021626	-0.665326	1.33019e-05	Reactive Intermediate Deaminase A chloroplastic
Zm00001d033303	0.336726	0.000628408	Roothairless 1		Zm00001d043430	-3.00347	0.00649304	NA		Zm00001d031091	-1.22945	1.33222e-05	NA
Zm00001d010985	1.07797	0.000629645	Probable sugar phosphate/phosphate translocator		Zm00001d049561	3.2638	0.00649577	NA		Zm00001d041574	2.11642	1.39289e-05	Probable LRR receptor-like serine/threonine-protein kinase
Zm00001d009054	-0.34964	0.000639887	NA		Zm00001d009230	-0.527376	0.00656309	Poly		Zm00001d030037	-1.43961	1.3975e-05	Replication factor C subunit 3
Zm00001d023516	-2.61212	0.000642956	Salt stress-induced protein		Zm00001d042455	0.994019	0.0065669	RING/U-box superfamily protein		Zm00001d051884	0.497749	1.41466e-05	hydroxyproline-rich glycoprotein family protein
Zm00001d012689	0.712222	0.000645301	Protein CURVATURE THYLAKOID 1C chloroplastic		Zm00001d044061	1.10632	0.0065669	F-box domain containing protein		Zm00001d028445	-1.74355	1.42157e-05	RAD-like 3
Zm00001d011312	1.28289	0.000646705	Putative leucine-rich repeat receptor-like protein kinase family protein		Zm00001d001349	2.25416	0.0065669	NA		Zm00001d014617	-2.31281	1.4678e-05	Xyloglucan endotransglucosylase/hydrolase protein 14
Zm00001d034372	0.783434	0.000654174	Calcium-dependent protein kinase 1		Zm00001d052684	-2.6082	0.00657103	O-methyltransferase ZRP4		Zm00001d009418	1.17963	1.46797e-05	alpha/beta-Hydrolases superfamily protein
Zm00001d034159	-0.284596	0.000657328	SWIB complex BAF60b domain-containing protein		Zm00001d052136	-1.59411	0.00657554	1-aminocyclopropane-1-carboxylate oxidase20		Zm00001d029460	-1.54856	1.48145e-05	Ids4-like protein
Zm00001d016977	-0.625796	0.000664169	Dynein light chain type 1 family protein		Zm00001d039926	1.09013	0.00657554	WAK2-OsWAK receptor-like cytoplasmic kinase (OsWAK-RLCK)		Zm00001d049179	-1.03119	1.48888e-05	O-methyltransferase ZRP4
Zm00001d047687	-1.33445	0.000664544	Chaperone DnaJ-domain superfamily protein		Zm00001d053091	2.54336	0.0066004	Adagio protein 3		Zm00001d032961	-1.40639	1.4978e-05	anther ear1
Zm00001d049100	0.412613	0.000665703	Target of Myb protein 1		Zm00001d013593	-2.53831	0.0066113	Expressed protein; protein		Zm00001d005313	-0.8133	1.50944e-05	alpha/beta-Hydrolases superfamily protein
Zm00001d018596	-0.427027	0.000665828	Probable calcium-binding protein CML27		Zm00001d009010	-1.10471	0.0066113	Plasma membrane-associated cation-binding protein 1		Zm00001d046661	0.984041	1.50944e-05	Amino acid transporter-like protein/ Amino acid transporter-like protein isoform 1/ Amino acid transporter-like protein isoform 2
Zm00001d027448	0.948103	0.000670303	DUF21 domain-containing protein		Zm00001d005359	1.06957	0.00666886	ATP-dependent protease Clp ATPase subunit		Zm00001d041416	-0.756387	1.5144e-05	Auxin-responsive protein IAA14
Zm00001d042826	-1.5578	0.000670303	AER		Zm00001d020538	0.641678	0.0067113	Tsi1-interacting protein TSIP1		Zm00001d018032	-1.31471	1.5144e-05	Probable mannan synthase 7
Zm00001d016659	0.365521	0.000670303	Acetyl-coenzyme A synthetase chloroplastic/glyoxysomal		Zm00001d021385	-0.512164	0.0067113	NADPH--cytochrome P450 reductase 2		Zm00001d012689	0.837234	1.5189e-05	Protein CURVATURE THYLAKOID 1C chloroplastic
Zm00001d031970	-0.590237	0.000671691	NAD(P)-linked oxidoreductase superfamily protein		Zm00001d008399	2.17863	0.0067113	Putative NAC domain transcription factor superfamily protein		Zm00001d046460	0.978597	1.52533e-05	UDP-glycosyltransferase 75B1
Zm00001d002739	-0.709586	0.000671691	Polyketide cyclase/dehydrase and lipid transport superfamily protein		Zm00001d018064	2.86216	0.00672783	Laccase-14		Zm00001d009904	-0.929746	1.53395e-05	NA
Zm00001d019698	-0.777685	0.000671691	Cyclase family protein		Zm00001d011299	5.47993	0.00674715	sugars will eventually be exported transporter6b		Zm00001d032636	1.50015	1.54671e-05	Putative GEM-like protein 8
Zm00001d011975	0.559957	0.000671691	ENTH/VHS family protein		Zm00001d043587	-1.07474	0.00675562	Transferase: transferring glycosyl groups		Zm00001d010440	-1.81472	1.54671e-05	sugars will eventually be exported transporter3a
Zm00001d038049	-2.24581	0.000671691	Lichenase-2/ Putative O-Glycosyl hydrolase superfamily protein		Zm00001d013120	-0.949018	0.00675562	Cell differentiation Rcd1-like protein		Zm00001d041004	-1.79948	1.5468e-05	Lysine histidine transporter-like 8
Zm00001d048192	2.23839	0.000671691	AIR12		Zm00001d024600	-1.6337	0.00678173	ABC transporter B family member 19		Zm00001d009123	-1.15399	1.5468e-05	Galactose oxidase/kelch repeat superfamily protein
Zm00001d008620	0.959383	0.000680338	Metallothionein-like protein 2A		Zm00001d002055	-2.93547	0.00680263	Ripening-related protein 3		Zm00001d038465	-1.90876	1.5468e-05	Major facilitator superfamily protein
Zm00001d009912	-0.393492	0.000680338	Chaperone protein dnaJ 49		Zm00001d029604	-2.50717	0.00681096	Peroxidase 2		Zm00001d052785	0.301133	1.55577e-05	Plant UBX domain-containing protein 11
Zm00001d048373	0.818004	0.000682416	Carotenoid 910(9'10')-cleavage dioxygenase 1		Zm00001d003149	-1.19152	0.00681096	Probable folate-biopterin transporter 2		Zm00001d018238	-2.08797	1.58497e-05	Thioredoxin-like 3-1 chloroplastic
Zm00001d002410	1.14595	0.000684485	Probable xyloglucan endotransglucosylase/hydrolase protein 21		Zm00001d025859	0.968844	0.00681096	MazG nucleotide pyrophosphohydrolase domain protein		Zm00001d033529	-0.814275	1.58934e-05	5'-AMP-activated protein kinase-related
Zm00001d007885	-1.01386	0.000688067	Glutaredoxin family protein		Zm00001d012472	-2.08497	0.00682363	Ankyrin repeat family protein		Zm00001d043444	-1.14639	1.60143e-05	plant-specific domain TIGR01615 family protein expressed
Zm00001d011458	-0.785212	0.000691107	Protein kinase superfamily protein		Zm00001d008268	0.512788	0.00686807	cystatin4		Zm00001d029048	0.275237	1.61239e-05	Eukaryotic translation initiation factor 2 beta subunit
Zm00001d028293	-0.582649	0.000694251	Heptahelical transmembrane protein 5		Zm00001d025296	0.856335	0.00687755	Nudix hydrolase 13		Zm00001d030933	4.17023	1.61256e-05	NA
Zm00001d032429	3.59958	0.000696554	Late embryogenesis abundant (LEA) hydroxyproline-rich glycoprotein family		Zm00001d031806	-2.29562	0.00688892	NA		Zm00001d041518	-1.3719	1.61461e-05	Expressed protein; protein
Zm00001d046005	0.538005	0.000702262	Glycosyltransferase family 61 protein		Zm00001d034890	-0.455151	0.00689673	Outer envelope pore protein 24A chloroplastic		Zm00001d041634	0.823801	1.63136e-05	NA
Zm00001d050323	1.20748	0.000706124	Putative cytochrome P450 superfamily protein		Zm00001d046318	2.75724	0.00690687	Putative FAD-binding Berberine family protein		Zm00001d033046	0.321088	1.64786e-05	NagB/RpiA/CoA transferase-like superfamily protein
Zm00001d028750	2.19344	0.000714391	asparagine synthetase3		Zm00001d041534	-1.88252	0.00694024	Transmembrane amino acid transporter family protein		Zm00001d047507	-1.14613	1.64786e-05	Putative RING zinc finger domain superfamily protein
Zm00001d023174	-0.728234	0.000718253	NA		Zm00001d032084	-1.28392	0.00696	Chaperone DnaJ-domain superfamily protein		Zm00001d039097	1.52571	1.66195e-05	Protein STRUBBELIG-RECEPTOR FAMILY 1
Zm00001d048615	-1.12475	0.000725377	Putative membrane lipoprotein		Zm00001d044452	-1.017	0.00696272	NA		Zm00001d019447	-0.592096	1.66237e-05	NA
Zm00001d040441	-1.84588	0.000728576	NA		Zm00001d046286	-0.814045	0.00699889	RPGR ORF15 isoform		Zm00001d049431	2.36162	1.68419e-05	Germin-like protein subfamily 1 member 8
Zm00001d019450	1.49146	0.000739678	CO(2)-response secreted protease		Zm00001d042028	-0.471888	0.00700384	NA		Zm00001d026377	-2.18987	1.68578e-05	Organic cation/carnitine transporter 4
Zm00001d033551	1.28579	0.000747348	Phosphoglycerate mutase-like family protein		Zm00001d043805	0.621136	0.00700384	zinc finger protein-related		Zm00001d029628	-1.06815	1.71158e-05	cystatin7
Zm00001d036008	-0.419986	0.000750771	calcium dependent protein kinase14		Zm00001d016803	0.267626	0.00700384	RNA polymerase II transcriptional coactivator KIWI		Zm00001d042421	0.325292	1.7157e-05	Lysine ketoglutarate reductase trans-splicing related 1
Zm00001d053068	-1.39143	0.000767182	uncharacterized protein		Zm00001d037034	0.333559	0.00700384	PHD finger protein-related		Zm00001d042921	0.450343	1.7157e-05	SLT1 protein
Zm00001d024492	0.395326	0.000778272	Valine--tRNA ligase mitochondrial 1		Zm00001d044748	1.62943	0.00700384	Pyruvate dehydrogenase E1 component subunit alpha-1 mitochondrial		Zm00001d024155	-0.725174	1.7162e-05	(DL)-glycerol-3-phosphatase 2
Zm00001d044541	-1.3588	0.000781514	SPX domain-containing protein 3		Zm00001d006449	-1.39805	0.00700879	UDP-glycosyltransferase 71B1		Zm00001d036778	1.99737	1.73229e-05	NA
Zm00001d029768	0.882232	0.000785371	barley mlo defense gene homolog2		Zm00001d002796	-1.21388	0.00708266	ELMO/CED-12 family protein		Zm00001d039406	-0.805229	1.78824e-05	Receptor-like protein kinase
Zm00001d033098	-1.25537	0.000785371	post-illumination chlorophyll fluorescence increase		Zm00001d045024	1.9841	0.00708266	NA		Zm00001d020362	-4.89066	1.83567e-05	Catalytic/ hydrolase
Zm00001d042066	0.285246	0.000785371	glycoside hydrolase family 2 protein		Zm00001d029038	2.51443	0.00709559	HAD superfamily subfamily IIIB acid phosphatase		Zm00001d018218	-0.693616	1.84116e-05	N-acetyltransferase
Zm00001d042656	2.32183	0.000787506	Beta-galactosidase 16		Zm00001d024799	2.31933	0.00710956	NA		Zm00001d029266	-0.483332	1.87553e-05	calcium ion binding
Zm00001d009708	0.552954	0.000787506	Putative calcium-dependent protein kinase family protein		Zm00001d034318	-0.746928	0.0071311	GTP-binding protein-related		zma-MIR164d	-2.00826	1.87713e-05	NA
Zm00001d037243	-1.57498	0.000787506	NA		Zm00001d016000	-0.529491	0.0071311	Myb-related protein 3R-1		ENSRNA049997473	-2.00826	1.87713e-05	NA
Zm00001d024466	-0.372163	0.000787543	Cullin-3B		Zm00001d030656	1.4108	0.00717132	rotten ear1		Zm00001d010586	3.38014	1.88129e-05	PEBP (phosphatidylethanolamine-binding protein) family protein
Zm00001d024916	1.6413	0.000787543	UNC93-like protein 2		Zm00001d024531	-1.01794	0.00718175	Putative cellulose synthase-like family protein		Zm00001d016542	-1.01774	1.88735e-05	FAD/NAD(P)-binding oxidoreductase
Zm00001d025551	0.372457	0.000787543	Polyadenylate-binding protein RBP47B		Zm00001d016260	-1.68038	0.00719187	Ethylene-responsive transcription factor ERF036		Zm00001d023281	-0.433051	1.89489e-05	NA
Zm00001d022551	-0.625743	0.000789005	ribonuclease Ps		Zm00001d035304	-1.71773	0.00724249	LIM domain-containing protein WLIM1		Zm00001d009511	-0.516262	1.92205e-05	NA
Zm00001d031602	-0.734132	0.000797389	Uridine kinase-like protein 2 chloroplastic		Zm00001d003386	-0.830121	0.00731629	NA		Zm00001d026483	-0.30392	1.98401e-05	NADPH--cytochrome P450 reductase
Zm00001d016653	-0.342037	0.000798474	WD repeat-containing protein LWD1		Zm00001d037941	-2.57226	0.00731629	Ethylene-responsive transcription factor RAP2-3		Zm00001d049433	2.1253	1.99448e-05	Germin-like protein subfamily 1 member 8
Zm00001d020607	-1.61116	0.000799927	Dormancy-associated protein homolog 3		Zm00001d045573	0.421173	0.00731629	Sec14p-like phosphatidylinositol transfer family protein		Zm00001d031970	-0.695861	2.01004e-05	NAD(P)-linked oxidoreductase superfamily protein
Zm00001d013943	-1.16796	0.000800107	FIP1		Zm00001d025757	0.62479	0.00731629	Protein NLP8		Zm00001d053757	2.75275	2.02144e-05	Galactose mutarotase-like superfamily protein
Zm00001d006651	0.724737	0.00080318	Tubulin alpha-5 chain		Zm00001d008862	5.29666	0.00743056	cytokinin oxidase 5		Zm00001d042033	0.574956	2.02144e-05	Pentatricopeptide repeat-containing protein mitochondrial
Zm00001d040784	0.540029	0.00080402	Glycine-rich domain-containing protein 1		Zm00001d013868	-1.21294	0.00746245	CDPK-related kinase 3		Zm00001d009923	-2.18375	2.02144e-05	NA
Zm00001d036703	-2.68889	0.00080402	Protein GLUTAMINE DUMPER 5		Zm00001d018292	1.73342	0.00747659	NA		Zm00001d034034	-0.453543	2.04833e-05	Protein TORNADO 1
Zm00001d029419	0.582426	0.000804763	Probable protein phosphatase 2C 12		Zm00001d027341	1.97089	0.00749432	AAA-ATPase		Zm00001d006631	-0.722143	2.07256e-05	Organic cation/carnitine transporter 7
Zm00001d042421	0.273534	0.000804763	Lysine ketoglutarate reductase trans-splicing related 1		Zm00001d029140	1.02101	0.00749432	alpha/beta-Hydrolases superfamily protein		Zm00001d026440	-3.00474	2.07917e-05	DNA-binding WRKY
Zm00001d026285	-1.06276	0.000804763	OSJNBa0070C17.17 protein; protein		Zm00001d003353	1.36394	0.00749432	Copper transport protein family		Zm00001d030927	3.13546	2.07942e-05	NA
Zm00001d040462	0.413463	0.00080635	COP9 signalosome complex subunit 2		Zm00001d017583	-1.98982	0.00749432	Generic methyltransferase		Zm00001d051406	-0.799383	2.1185e-05	LYR family of Fe/S cluster biogenesis protein
Zm00001d031581	0.781246	0.000809791	Probable pre-mRNA-splicing factor ATP-dependent RNA helicase DEAH5		Zm00001d012418	1.97203	0.00749432	ENTH/VHS family protein		Zm00001d030166	-0.366581	2.13907e-05	Glycosyltransferase-like KOBITO 1
Zm00001d041163	2.04176	0.000814038	Protein NRT1/ PTR FAMILY 4.2		Zm00001d051789	-2.5812	0.00754139	Microtubule motor/ Putative dynein light chain type 1 family protein		Zm00001d012237	0.836974	2.17997e-05	SnRK1-interacting protein 1
Zm00001d028349	-1.78914	0.000817683	Peroxidase 59		Zm00001d053102	0.97476	0.00766764	Tubulin alpha-6 chain		Zm00001d048710	-4.11813	2.19143e-05	benzoxazinone synthesis2
Zm00001d026635	0.996354	0.000817683	Allantoinase		Zm00001d036766	-1.53855	0.00766764	Putative leucine-rich repat protein kinase family protein		Zm00001d008431	2.90415	2.24424e-05	Paired amphipathic helix protein Sin3-like 5
Zm00001d028110	1.24846	0.000821554	Uncharacterised conserved protein (UCP012943)		Zm00001d048732	0.437888	0.00772988	Sodium/hydrogen exchanger		Zm00001d025281	1.40926	2.24704e-05	Putative AP2/EREBP transcription factor superfamily protein
Zm00001d052591	2.02065	0.000821554	B3 domain-containing protein		Zm00001d002020	1.01839	0.00772988	OSJNBb0022F16.11 protein; protein		Zm00001d002520	-0.892439	2.25915e-05	OSJNBa0013K16.16 protein; protein
Zm00001d039616	0.724301	0.000821554	Probable folate-biopterin transporter 4		Zm00001d031449	1.79314	0.0077395	Lipoxygenase 2 chloroplastic		Zm00001d042307	-2.34369	2.26148e-05	NA
Zm00001d023498	-0.661649	0.000821554	Retrovirus-related Pol polyprotein LINE-1		Zm00001d010492	-0.364023	0.0077395	Protein kinase superfamily protein		Zm00001d034199	2.7148	2.29024e-05	Ocs element-binding factor 1
Zm00001d051264	-5.25297	0.000822827	Xyloglucan 6-xylosyltransferase 2		Zm00001d045395	1.17338	0.0077395	Sugar transport protein 3		Zm00001d042901	-1.71707	2.30464e-05	L-ascorbate oxidase
Zm00001d014811	-0.537214	0.000822885	DNL zinc finger family protein		Zm00001d034388	0.876784	0.0077505	aldehyde oxidase4		Zm00001d009482	-0.625668	2.30616e-05	NA
Zm00001d047436	-1.40969	0.000825038	AAA-ATPase ASD mitochondrial		Zm00001d005742	-2.57993	0.00777903	NA		Zm00001d007319	2.57409	2.30686e-05	Subtilisin-like serine endopeptidase family protein
Zm00001d038523	-1.48531	0.000828827	NA		Zm00001d022349	-1.56084	0.00777903	Probable galacturonosyltransferase-like 4		Zm00001d023735	-1.16364	2.32374e-05	Nitrilase-associated protein
Zm00001d049692	1.39559	0.000829129	Agamous-like MADS-box protein AGL12		Zm00001d048383	2.0779	0.00777903	MYB305/ Putative MYB DNA-binding domain superfamily protein		Zm00001d007965	-0.623973	2.35026e-05	mitogen-activated protein kinase kinase kinase 5
Zm00001d035689	-1.36263	0.000829584	cysteine protease5		Zm00001d022593	1.8834	0.00783455	Diaminopimelate decarboxylase 2 chloroplastic		Zm00001d029008	-0.545204	2.35692e-05	O-fucosyltransferase family protein
Zm00001d031738	-1.41172	0.000835726	photosystemI2		Zm00001d027091	-2.79507	0.007843	NA		Zm00001d031539	-0.538891	2.36556e-05	S-adenosyl-L-methionine-dependent methyltransferases superfamily protein
Zm00001d015247	-0.347067	0.000847696	DNA/RNA-binding protein Kin17 conserved region		Zm00001d019507	-1.18935	0.00784748	Cellulose synthase-7		Zm00001d029377	-1.7663	2.37377e-05	NA
Zm00001d013052	0.549419	0.000851327	Hydroxyproline O-galactosyltransferase GALT4		Zm00001d009727	0.6182	0.00787937	Cytochrome c oxidase subunit 5b-2 mitochondrial		Zm00001d038972	1.13259	2.39559e-05	Probable ubiquitin-conjugating enzyme E2 24
Zm00001d050089	0.417005	0.000854951	Putative 1-phosphatidylinositol-4-phosphate 5-kinase/ zinc ion binding family		Zm00001d003884	1.80095	0.0079522	NA		Zm00001d046812	1.09413	2.39748e-05	Chaperone protein dnaJ 8 chloroplastic
Zm00001d017113	0.445475	0.00085636	NA		Zm00001d044986	2.20644	0.0079522	NA		Zm00001d004308	-1.92632	2.41914e-05	phosphate transporter protein5
Zm00001d009416	-0.992407	0.000856431	Jacalin-related lectin 19		Zm00001d042209	1.53141	0.00799443	methyl esterase 10		Zm00001d046243	1.12828	2.44597e-05	Putative ferroportin-domain family protein
Zm00001d045600	-1.26441	0.000856431	NAC domain-containing protein 26		Zm00001d025818	-1.41124	0.00799443	GDSL esterase/lipase LTL1		Zm00001d022192	1.92723	2.45894e-05	trehalose-6-phosphate phosphatase9
Zm00001d014462	-0.640046	0.000857198	40S ribosomal protein S14		Zm00001d008903	-1.03894	0.00801212	Peptide-N4-(N-acetyl-beta-glucosaminyl)asparagine amidase A protein		Zm00001d006089	-0.961933	2.46301e-05	Shaggy kinase homolog
Zm00001d029441	-2.01395	0.000864394	Probable pectinesterase/pectinesterase inhibitor 13		Zm00001d048334	1.39717	0.00803718	Whole genome shotgun sequence of line PN40024 scaffold_113.assembly12x (Fragment)		Zm00001d052180	-0.932869	2.4866e-05	tunicate1
Zm00001d052972	-0.564085	0.000864394	NA		Zm00001d042487	-1.20229	0.00803909	Sn1-specific diacylglycerol lipase alpha		Zm00001d012088	1.53621	2.4866e-05	NA
Zm00001d038852	-0.949535	0.000864394	reversion-to-ethylene sensitivity1 like3		Zm00001d031704	-3.06362	0.00805649	NA		Zm00001d044494	-0.388128	2.52278e-05	Pectin acetylesterase 9
Zm00001d041715	-0.581629	0.000865946	VIN3-like protein 1		Zm00001d003524	1.11901	0.00805877	NAD(P)-linked oxidoreductase superfamily protein		Zm00001d014629	2.34853	2.52278e-05	Homeobox-leucine zipper protein HAT9
Zm00001d000408	-0.947174	0.000880713	EIN3-binding F-box protein 1		Zm00001d043798	1.64502	0.00805877	Kinase superfamily protein		Zm00001d037160	1.64553	2.53082e-05	Nodulin protein
Zm00001d034807	0.566074	0.000890204	Late embryogenesis abundant protein group 2		Zm00001d022092	1.31997	0.00805877	Cytosolic sulfotransferase 17		Zm00001d038866	0.940141	2.53859e-05	alpha/beta-Hydrolases superfamily protein
Zm00001d012836	-1.24204	0.000890204	hydroxyproline-rich glycoprotein family protein		Zm00001d008281	0.624736	0.00805877	EMB1374 isoform 1/ EMB1374 isoform 2		Zm00001d008452	-1.11043	2.55694e-05	Sulfated surface glycoprotein 185
Zm00001d014606	1.74537	0.000890204	Peroxidase 45		Zm00001d010204	-1.37987	0.00805877	alpha/beta-Hydrolases superfamily protein		Zm00001d014091	0.934088	2.55792e-05	F-box domain containing protein
Zm00001d037427	-0.476348	0.000893251	40S ribosomal protein S4-3		Zm00001d017101	-1.54337	0.00809678	Protein binding protein		Zm00001d037468	-2.03544	2.58813e-05	phosphate transporter4
Zm00001d044120	-0.913149	0.000894423	Sterol 14-demethylase		Zm00001d034493	-0.693447	0.00809898	Riboflavin kinase family protein		Zm00001d049187	1.04326	2.58873e-05	phosphogluconate dehydrogenase3
Zm00001d030697	-0.673327	0.000897299	NA		Zm00001d007153	-0.825068	0.0081042	Hypoxia-responsive family protein		Zm00001d026362	0.3402	2.60272e-05	Putative MYB DNA-binding domain superfamily protein
Zm00001d050131	0.473771	0.000897299	Putative CRAL/TRIO domain containing: Sec14p-like phosphatidylinositol transfer family protein		Zm00001d013244	1.7204	0.00815043	UDP-glycosyltransferase 83A1		Zm00001d039355	0.85619	2.60435e-05	Histone-lysine N-methyltransferase ATX4
Zm00001d014006	-1.72973	0.000897299	NA		Zm00001d042140	2.73056	0.00818307	Beta-1:3-glucanase		Zm00001d011769	-1.96606	2.61759e-05	Tetraspanin-6
Zm00001d037927	0.374383	0.00090276	LYR motif-containing protein 7 isoform 2		Zm00001d048741	0.926316	0.00819543	Nuclear pore complex protein NUP107		Zm00001d022062	-1.49199	2.63242e-05	NA
Zm00001d045573	-0.378557	0.00090927	Sec14p-like phosphatidylinositol transfer family protein		Zm00001d052733	-1.25023	0.00819543	BAG family molecular chaperone regulator 1		Zm00001d038491	-0.710326	2.63242e-05	Acetyltransferase NSI
Zm00001d002020	-0.920089	0.000916978	OSJNBb0022F16.11 protein; protein		Zm00001d014613	-1.31726	0.00819543	Xyloglucan endotransglucosylase/hydrolase protein 23		Zm00001d029680	-1.32559	2.66513e-05	NA
Zm00001d028367	-1.32466	0.000919473	Purple acid phosphatase 3		Zm00001d047236	0.975748	0.00819543	P-loop containing nucleoside triphosphate hydrolases superfamily protein		Zm00001d044538	-1.61793	2.69582e-05	NA
Zm00001d011181	-1.29865	0.000919473	elongation factor Ts family protein		Zm00001d047633	0.386765	0.00820141	Putative DEAD-box ATP-dependent RNA helicase family protein		Zm00001d048637	2.30782	2.72683e-05	Disease resistance RPP13-like protein 4
Zm00001d036126	2.17334	0.000919473	NA		Zm00001d050470	-1.20098	0.00820729	Phospholipase D beta 1		Zm00001d051901	1.11863	2.72683e-05	P-loop NTPase domain-containing protein LPA1 homolog 1
Zm00001d023175	-0.729078	0.000919473	NA		Zm00001d029679	-1.30276	0.00825876	Ethylene-responsive transcription factor ERF025		Zm00001d018064	2.97406	2.72683e-05	Laccase-14
Zm00001d028409	-3.48115	0.000923361	Chaperonin 60 subunit beta 4 chloroplastic		Zm00001d037266	0.710427	0.00830184	O-fucosyltransferase family protein		Zm00001d035222	-1.00111	2.72683e-05	NA
Zm00001d038867	-1.68687	0.000928014	NA		Zm00001d004401	2.16267	0.00835654	Germin-like protein subfamily 1 member 8		Zm00001d038841	1.72938	2.72683e-05	putative aldehyde dehydrogenase MIS1
Zm00001d044144	0.510179	0.000934269	CTD-phosphatase-like protein		Zm00001d012895	-0.865	0.00845428	DUF4378 domain protein		Zm00001d041645	-2.14479	2.72913e-05	NA
Zm00001d003482	2.41796	0.000936685	NA		Zm00001d021073	1.05688	0.00848183	transferases transferring acyl groups other than amino-acyl groups;acyltransferases		Zm00001d042543	-0.397325	2.72913e-05	Putative metallophosphoesterase
Zm00001d051889	-0.732474	0.000938565	Protein EIN4		Zm00001d018902	0.252022	0.00850347	Galactose-1-phosphate uridyl transferase-like protein		Zm00001d012566	1.92807	2.73217e-05	BEST Arabidopsis thaliana protein match is: mucin-related (TAIR:AT2G02880.1); Has 35333 Blast hits to 34131 proteins in 2444 species: Archae - 798; Bacteria - 22429; Metazoa - 974; Fungi - 991; Plants - 531; Viruses - 0; Other Eukaryotes - 9610 (sou /.../CBI BLink).
Zm00001d021699	-1.11799	0.000939844	NA		Zm00001d042949	1.36194	0.00852448	Probable membrane-associated kinase regulator 4		Zm00001d008398	-1.077	2.7795e-05	NA
Zm00001d023062	0.3308	0.00094175	NA		Zm00001d003070	1.55342	0.00856464	Protein kinase superfamily protein		Zm00001d033669	0.270658	2.80009e-05	Oxysterol-binding protein-related protein 1C
Zm00001d033080	1.88564	0.00094547	QWRF motif-containing protein 3		Zm00001d018362	1.83154	0.00856464	Protein TSS		Zm00001d036297	-0.916739	2.80679e-05	Zinc finger: C2H2 type family protein isoform 1/ Zinc finger: C2H2 type family protein isoform 2
Zm00001d034205	0.732851	0.00094547	Probable xyloglucan glycosyltransferase 12		Zm00001d013738	-0.643448	0.00856697	Fcf2 pre-rRNA processing protein		Zm00001d047973	-1.78017	2.80862e-05	NA
Zm00001d022228	-1.23643	0.00094547	Ribonuclease 1		Zm00001d010558	-1.47006	0.00856783	Protein NETWORKED 2D		Zm00001d022637	-1.70031	2.81008e-05	THAUMATIN-LIKE PROTEIN 1
Zm00001d023434	-0.520994	0.00094547	Rac GTPase activating protein 1		Zm00001d028303	2.57394	0.00858535	Branched-chain-amino-acid aminotransferase		Zm00001d003006	2.05125	2.87114e-05	Aquaporin PIP2-5
Zm00001d026295	-1.25286	0.00094906	NA		Zm00001d051884	0.453286	0.00858535	hydroxyproline-rich glycoprotein family protein		Zm00001d044156	1.76994	2.97357e-05	cytochrome P450 family 72 subfamily A polypeptide 8
Zm00001d038004	-0.801094	0.00095052	CASP-like protein 4B1		Zm00001d007169	2.92149	0.00858535	PAP/OAS1 substrate-binding domain superfamily		Zm00001d025043	0.877635	3.00299e-05	ABC transporter C family member 4
Zm00001d015183	0.744774	0.000960914	L-aspartate oxidase chloroplastic		Zm00001d039637	1.15708	0.00858535	Myb family transcription factor EFM		Zm00001d042511	-0.954896	3.01358e-05	Ribonuclease 2
Zm00001d028365	-0.694502	0.000961607	Cyclin-J18		Zm00001d044421	4.46762	0.00858535	sugars will eventually be exported transporter6a		Zm00001d016884	0.952581	3.01711e-05	F11F12.5 protein
Zm00001d033217	0.335633	0.000967855	Serine/threonine-protein phosphatase BSL3		Zm00001d015410	-0.856775	0.00858535	Squamosa promoter-binding-like protein 2		Zm00001d006354	1.44089	3.02412e-05	F22G5.33
Zm00001d022072	1.02364	0.000967855	Protein LONGIFOLIA 2		Zm00001d008177	0.382104	0.00858535	PTI1-like tyrosine-protein kinase 3		Zm00001d014451	1.02574	3.0432e-05	Glutamate receptor 3.4
Zm00001d054081	1.57256	0.000968229	WAT1-related protein		Zm00001d009022	2.97534	0.00858535	NmrA-like negative transcriptional regulator family protein		Zm00001d036468	0.864901	3.04583e-05	NA
Zm00001d003252	0.641669	0.000968801	glucose-6-phosphate dehydrogenase1		Zm00001d008139	-0.721437	0.00858535	NA		Zm00001d010856	1.37941	3.0907e-05	Peripheral-type benzodiazepine receptor
Zm00001d017379	-0.883542	0.000968801	Thioredoxin M1 chloroplastic		Zm00001d047882	0.582907	0.00858535	ERAD-associated E3 ubiquitin-protein ligase component HRD3A		Zm00001d010948	-1.21352	3.10377e-05	liguleless4
Zm00001d048066	1.03523	0.000968801	Sec14p-like phosphatidylinositol transfer family protein		Zm00001d025178	0.562082	0.00858535	Sterile alpha motif (SAM) domain-containing protein		Zm00001d047719	-0.979367	3.10796e-05	Protein kinase superfamily protein
Zm00001d028601	0.664718	0.000970836	Haloacid dehalogenase-like hydrolase (HAD) superfamily protein		Zm00001d014493	-1.08922	0.00860367	Wound-responsive family protein		Zm00001d018414	1.60264	3.14033e-05	IAA9-auxin-responsive Aux/IAA family member
Zm00001d038485	2.53085	0.000983087	Serine/threonine-protein kinase STN8 chloroplastic		Zm00001d002290	-0.968229	0.00865436	NA		Zm00001d006069	2.32491	3.23287e-05	Putative quinone-oxidoreductase homolog chloroplastic
Zm00001d014812	-0.291715	0.000985963	RNA-binding (RRM/RBD/RNP motifs) family protein		Zm00001d029004	-0.325077	0.00868108	Guanine nucleotide exchange factor SPIKE 1		Zm00001d017176	-1.44114	3.23287e-05	CONSTANS-like protein CO5
Zm00001d014337	0.332724	0.00098743	Transcription initiation factor IIF: alpha subunit		Zm00001d031164	2.55037	0.00868108	Transcription factor JUNGBRUNNEN 1		Zm00001d040014	-1.40911	3.29988e-05	Nuclease PA3
Zm00001d027523	0.48924	0.000991734	Probable serine/threonine-protein kinase		Zm00001d043050	1.54241	0.00868108	RING-H2 finger protein ATL74		Zm00001d043149	0.303837	3.33987e-05	Leucine-rich repeat (LRR) family protein
Zm00001d045044	0.464545	0.000991734	AP2-EREBP-transcription factor 160		Zm00001d034179	-2.98046	0.0087377	Plastoquinol-plastocyanin reductase		Zm00001d054060	2.58008	3.35662e-05	nitrate transport1
Zm00001d026154	0.653478	0.000991734	Glutathione peroxidase		Zm00001d011718	0.390087	0.00874392	zinc knuckle (CCHC-type) family protein		Zm00001d033641	-0.46484	3.38074e-05	NA
Zm00001d034345	0.800049	0.000991809	Ferredoxin--NADP reductase root isozyme 1 chloroplastic		Zm00001d022613	-1.885	0.00876365	Delayed flowering1		Zm00001d031863	0.300868	3.39181e-05	Mediator of RNA polymerase II transcription subunit 15a
Zm00001d038334	-1.09843	0.000996922	Protein NRT1/ PTR FAMILY 5.10		Zm00001d009797	1.47139	0.00882223	Lactoylglutathione lyase / glyoxalase I family protein		Zm00001d035591	-1.17889	3.39181e-05	Expressed protein; protein
Zm00001d048115	0.717011	0.000996922	nucleotidyltransferases		Zm00001d032253	3.01937	0.00883072	Type IV inositol polyphosphate 5-phosphatase 9		Zm00001d010204	-1.45358	3.44592e-05	alpha/beta-Hydrolases superfamily protein
Zm00001d035040	0.500376	0.000997381	Putative ARM repeat-containing protein containing family protein isoform 1/ Putative ARM repeat-containing protein containing family protein isoform 2/ Putative ARM repeat-containing protein containing family protein isoform 3		Zm00001d007044	0.931208	0.00884858	Cytochrome P450 CYP727A4		Zm00001d003559	1.95372	3.53704e-05	Ferric reduction oxidase 7 chloroplastic
Zm00001d033637	0.962294	0.00100455	GNS1/SUR4 membrane protein family		Zm00001d045948	0.928602	0.009012	Protein DETOXIFICATION 16		Zm00001d038127	0.615637	3.53704e-05	Probable E3 ubiquitin-protein ligase LUL4
Zm00001d047796	0.65408	0.00101381	Trifunctional UDP-glucose 46-dehydratase/UDP-4-keto-6-deoxy-D-glucose 35-epimerase/UDP-4-keto-L-rhamnose-reductase RHM2		Zm00001d013787	0.887316	0.00901628	Secretory carrier-associated membrane protein 3		Zm00001d047057	-0.746992	3.53704e-05	NA
Zm00001d048474	0.56968	0.00101381	MADS1		Zm00001d020202	1.37062	0.00907472	NA		Zm00001d031941	0.330696	3.54663e-05	CONTAINS InterPro DOMAIN/s: Kinase phosphorylation domain (InterPro:IPR019315); Has 8882 Blast hits to 4920 proteins in 346 species: Archae - 10; Bacteria - 184; Metazoa - 3955; Fungi - 1221; Plants - 712; Viruses - 24; Other Eukaryotes - 2776 (sour /.../BI BLink).
Zm00001d042512	-0.852146	0.00101452	Ribonuclease 2		Zm00001d028264	-0.427367	0.00914014	UDP-3-O-acyl N-acetylglycosamine deacetylase family protein		Zm00001d003226	2.88689	3.55016e-05	phosphatidylethanolamine-binding protein25
Zm00001d040129	0.870684	0.00101676	Phosphoenolpyruvate carboxylase 4		Zm00001d038405	-0.604904	0.0091509	Ypt/Rab-GAP domain of gyp1p superfamily protein		Zm00001d001841	-0.577212	3.58257e-05	NA
Zm00001d026297	1.07112	0.00101676	Proline-rich family protein		Zm00001d047952	1.40605	0.00915389	NA		Zm00001d005410	3.33713	3.58257e-05	Aquaporin PIP2-2
Zm00001d031588	1.51777	0.00102035	NA		Zm00001d015221	-1.70637	0.00916517	NA		Zm00001d050649	-3.21266	3.60455e-05	ZCN2
Zm00001d010210	0.827046	0.00102568	Potassium channel2		Zm00001d011847	2.137	0.00919903	Putative HLH DNA-binding domain superfamily protein		Zm00001d043293	1.04938	3.60455e-05	cytokinin oxidase 4
Zm00001d031877	4.27111	0.00102746	NA		Zm00001d026259	0.784232	0.00923937	NA		Zm00001d021656	-1.78516	3.6244e-05	Nodulin-like protein
Zm00001d052507	-0.604627	0.001029	Peroxisome biogenesis factor 10		Zm00001d002172	1.23926	0.00925551	G-type lectin S-receptor-like serine/threonine-protein kinase B120		Zm00001d010325	-0.935296	3.65492e-05	small basic membrane intrinsic protein1b
Zm00001d014769	-0.409444	0.00103815	NA		Zm00001d027330	-1.99355	0.00927882	Remorin		Zm00001d013593	-2.80675	3.69456e-05	Expressed protein; protein
Zm00001d035591	-0.980279	0.00103815	Expressed protein; protein		Zm00001d053049	1.10513	0.00927882	ATPase: coupled to transmembrane movement of substance/ ATPase: coupled to transmembrane movement of substances		Zm00001d031484	-1.51905	3.72133e-05	PsbP domain-containing protein 3 chloroplastic
Zm00001d041165	2.22614	0.00103831	Calcium-dependent protein kinase 24		Zm00001d040094	1.4516	0.00927882	G-type lectin S-receptor-like serine/threonine-protein kinase SD2-5		Zm00001d049952	0.910386	3.72145e-05	histidine-containing phosphotransfer protein3
Zm00001d035149	-1.76096	0.00103831	Putative endo-1:4-beta-mannosidase family protein		Zm00001d019527	1.42215	0.00929698	Yucca5		Zm00001d018331	-0.763009	3.72145e-05	Hsp70-Hsp90 organizing protein 2
Zm00001d004138	0.616344	0.00104009	Heavy metal-associated isoprenylated plant protein 27		Zm00001d002347	-2.32471	0.00931872	Bifunctional inhibitor/lipid-transfer protein/seed storage 2S albumin superfamily protein		Zm00001d009921	-1.21115	3.7294e-05	NA
Zm00001d008772	-1.60736	0.00104521	Serinc-domain containing serine and sphingolipid biosynthesis protein		Zm00001d047128	0.626457	0.00931959	MureinE1		Zm00001d011734	-2.00398	3.79378e-05	Inorganic pyrophosphatase 1
Zm00001d052911	-0.33014	0.00104615	RWD domain-containing protein		Zm00001d039379	-0.776457	0.00935038	sodium/calcium exchanger family protein / calcium-binding EF hand family protein		Zm00001d050708	-0.441277	3.80267e-05	Transducin/WD40 repeat-like superfamily protein
Zm00001d005819	-0.456975	0.00104615	Copper transporter 5		Zm00001d031127	-1.14822	0.00936577	Cupin: RmlC-type		Zm00001d032219	1.63047	3.80795e-05	Agamous-like MADS-box protein AGL16
Zm00001d012745	-0.379647	0.00104615	ubiquinol-cytochrome C chaperone family protein		Zm00001d047354	0.27931	0.00936577	SUMO-conjugating enzyme SCE1		Zm00001d048621	1.4209	3.83451e-05	ABC transporter G family member 11
Zm00001d034248	-0.960903	0.00104643	NA		Zm00001d049204	1.88237	0.00944825	NA		Zm00001d012138	2.15018	3.84742e-05	Protein NRT1/ PTR FAMILY 8.1
Zm00001d007173	0.616769	0.00104643	B3 domain-containing transcription repressor VAL2		Zm00001d009500	-1.43233	0.00945206	Serine/threonine protein phosphatase 2A 57 kDa regulatory subunit B' iota isoform		Zm00001d006761	-0.509696	3.88243e-05	EID1-like F-box protein 2
Zm00001d046060	-0.470138	0.00104643	CMP-sialic acid transporter 1		Zm00001d015233	-1.07188	0.00948027	Squamosa promoter-binding-like protein 2		Zm00001d012290	-1.63667	3.89164e-05	hemerythrin HHE cation-binding domain protein
Zm00001d013430	-0.484111	0.0010467	Atypical receptor-like kinase MARK		Zm00001d028143	-0.305064	0.00948071	COP9 signalosome complex subunit 4		Zm00001d016262	-2.03234	3.93979e-05	Ethylene-responsive transcription factor ERF036
Zm00001d024627	0.597127	0.00104756	myb-like transcription factor family protein		Zm00001d049556	-0.87836	0.00948071	Putative oxysterol binding domain family protein		Zm00001d002524	-2.37009	3.94647e-05	NA
Zm00001d001811	0.632301	0.00104806	Tetraspanin-19		Zm00001d015032	2.20478	0.00950044	Serine/threonine-protein kinase STY46		Zm00001d019704	2.23806	3.95554e-05	NA
Zm00001d038739	0.49408	0.00104966	Inner membrane protein oxaA		Zm00001d036361	0.754839	0.00950044	Protein LAZ1		Zm00001d026221	3.0621	3.96254e-05	Protein NRT1/ PTR FAMILY 8.3
Zm00001d047907	-2.13916	0.00105916	Putative homeodomain-like transcription factor superfamily protein		Zm00001d025025	0.809808	0.00950388	Electron transfer flavoprotein subunit beta mitochondrial		Zm00001d038019	-1.94044	4.00525e-05	protein; Ribosomal protein-like
Zm00001d010459	-1.54215	0.00106645	Putative CBL-interacting protein kinase family protein		Zm00001d049438	1.78189	0.00953712	Germin-like protein subfamily 1 member 8		Zm00001d022608	2.52388	4.04538e-05	Aquaporin PIP2-2
Zm00001d030529	-1.52834	0.00106941	NA		Zm00001d023833	0.398195	0.00954961	Nucleoside diphosphate kinase		Zm00001d032613	-1.18147	4.07274e-05	Pollen receptor-like kinase 4
Zm00001d004559	0.587233	0.00106941	Leucine-rich repeat protein kinase family protein		Zm00001d027684	-1.28855	0.00955187	RING-H2 finger protein ATL16		Zm00001d038327	0.412577	4.08883e-05	Proteinase inhibitor propeptide
Zm00001d008997	0.335442	0.00106941	Putative VHS/GAT domain containing family protein		Zm00001d041772	2.39424	0.00959107	glutathione transferase18		Zm00001d028414	-0.701361	4.13894e-05	ATP-dependent Clp protease ATP-binding subunit CLPT1 chloroplastic
Zm00001d035947	-0.385569	0.00107447	SMG9-like protein		Zm00001d006176	0.661137	0.00960277	Plant UBX domain-containing protein 8		Zm00001d042699	-0.576718	4.15859e-05	TRAM LAG1 and CLN8 (TLC) lipid-sensing domain containing protein
Zm00001d048492	-0.498834	0.00107836	Transcription factor TFIIIC tau55-related protein		Zm00001d021520	0.380482	0.00960277	RanBP2-type zinc finger protein		Zm00001d032418	-1.00869	4.17868e-05	endonuclease/exonuclease/phosphatase family protein
Zm00001d024016	-0.79987	0.00107888	zinc finger (Ran-binding) family protein		Zm00001d012702	-1.30213	0.00960277	Phosphoenolpyruvate carboxylase 3		Zm00001d018203	1.90841	4.25055e-05	Probable WRKY transcription factor 9
Zm00001d051294	-1.51215	0.0010816	Putative NAC domain transcription factor superfamily protein		Zm00001d038179	-1.73929	0.00960277	Protein NRT1/ PTR FAMILY 3.1		Zm00001d022045	-0.437763	4.27996e-05	tRNA/rRNA methyltransferase (SpoU) family protein
Zm00001d005501	0.318908	0.00108407	Serine/threonine protein phosphatase 2A 59 kDa regulatory subunit B' eta isoform		Zm00001d002772	-2.13024	0.00960626	Blue copper protein		Zm00001d025886	2.82076	4.32386e-05	Cytokinin-O-glucosyltransferase 3
Zm00001d042291	0.335472	0.00108587	ENTH/VHS family protein		Zm00001d020419	-0.343217	0.00973258	Ubiquitin receptor RAD23c		Zm00001d017932	1.0189	4.32802e-05	Agamous-like MADS-box protein AGL16
Zm00001d003119	0.282215	0.00109323	Trafficking protein particle complex II-specific subunit 120 homolog		Zm00001d023694	1.62164	0.00973258	2-oxoisovalerate dehydrogenase subunit alpha 2 mitochondrial		Zm00001d004697	-1.33065	4.33963e-05	IAA27-auxin-responsive Aux/IAA family member
Zm00001d052806	-0.362549	0.00110104	NA		Zm00001d005118	0.854023	0.00977994	Sec14p-like phosphatidylinositol transfer family protein		Zm00001d024745	1.52049	4.38139e-05	Peroxidase 64
Zm00001d040456	-0.445369	0.00110104	Phospholipid-transporting ATPase 1		Zm00001d033747	1.3426	0.00986892	Glutamine synthetase root isozyme 2		Zm00001d047944	1.29169	4.4091e-05	NA
Zm00001d015217	2.98488	0.00110104	Salicylate/benzoate carboxyl methyltransferase		Zm00001d040228	1.34328	0.00994868	Sarcosine oxidase		Zm00001d014481	1.46647	4.41674e-05	Dihydroflavonol-4-reductase
Zm00001d023918	-0.815748	0.00110104	Purple acid phosphatase 10		Zm00001d033117	2.44251	0.00996065	Mitochondrial fission protein ELM1		Zm00001d046813	1.06238	4.43009e-05	Chaperone protein dnaJ 8 chloroplastic
Zm00001d039378	1.72855	0.00110252	NA		Zm00001d000534	-3.70933	0.00996065	NA		Zm00001d025570	0.247835	4.43009e-05	Ubiquitin carboxyl-terminal hydrolase 3
Zm00001d006508	0.665101	0.00110409	Glutamate receptor 3.4		Zm00001d047536	-0.400376	0.00996065	NA		Zm00001d043350	2.20128	4.44214e-05	Probable indole-3-acetic acid-amido synthetase GH3.1
Zm00001d045030	-1.55282	0.00110696	NA		Zm00001d048389	-1.1182	0.00996065	Xyloglucan galactosyltransferase MUR3		Zm00001d026268	-2.016	4.44214e-05	Transferase
Zm00001d006602	0.212235	0.00110741	Probable ADP-ribosylation factor GTPase-activating protein AGD5		Zm00001d024946	-1.78831	0.00996065	flavone synthase typeII1		Zm00001d037630	2.17334	4.5254e-05	UDP-glycosyltransferase 73D1
Zm00001d028398	0.887116	0.00111166	Glycosyl hydrolase family 10 protein		Zm00001d049383	0.435089	0.00998684	Cytochrome c oxidase subunit 5B mitochondrial		Zm00001d003123	-0.358064	4.54558e-05	NA
Zm00001d005688	-1.9247	0.00111166	UDP-glycosyltransferase 90A1		Zm00001d000381	-1.29345	0.00998684	Putative ARM repeat-containing protein containing family protein		Zm00001d049141	-1.38103	4.56399e-05	Auxin-responsive protein IAA26
Zm00001d038291	0.726333	0.00111166	Ferredoxin-6: chloroplastic		Zm00001d040651	-1.31628	0.0100024	Ethylene-responsive transcription factor RAP2-2		Zm00001d041161	0.962542	4.56399e-05	NA
Zm00001d044695	-1.21256	0.00111715	Protein trichome birefringence-like 10		Zm00001d048450	-0.417521	0.010095	Phosphatidylinositol-glycan biosynthesis class F protein		Zm00001d034756	1.54866	4.61334e-05	NA
Zm00001d012750	0.712075	0.00111715	MACPF domain-containing protein CAD1		Zm00001d004875	0.961941	0.0100987	Two-component response regulator-like APRR9		Zm00001d049641	0.456402	4.65302e-05	Glyceraldehyde-3-phosphate dehydrogenase 1: cytosolic
Zm00001d010720	0.312678	0.00111863	AGC (cAMP-dependent cGMP-dependent and protein kinase C) kinase family protein		Zm00001d010651	0.797194	0.0100996	NA		Zm00001d013995	-2.05457	4.6712e-05	Peptide-N4-(N-acetyl-beta-glucosaminyl)asparagine amidase A protein
Zm00001d037181	0.767499	0.00111863	NA		Zm00001d047944	1.2221	0.0100996	NA		Zm00001d044435	-1.31356	4.67486e-05	DUF679 domain membrane protein 7
Zm00001d029886	-0.903998	0.00112496	NA		Zm00001d032520	-1.26605	0.0101078	Myosin heavy chain-related protein		Zm00001d003569	1.02151	4.67784e-05	barley mlo defense gene homolog3
zma-MIR164d	-1.5139	0.00112537	NA		Zm00001d014141	-1.3949	0.0101423	F-box protein		Zm00001d002144	-3.28032	4.7098e-05	Protein EPIDERMAL PATTERNING FACTOR 2
ENSRNA049997473	-1.5139	0.00112537	NA		Zm00001d036893	1.80414	0.0101527	NA		Zm00001d019256	1.45662	4.74546e-05	UDP-glycosyltransferase 76C1
Zm00001d012267	0.359397	0.00112537	NPL4-like protein 1		Zm00001d042770	-2.87417	0.0101706	Acidic endochitinase		Zm00001d002261	0.902823	4.76041e-05	Peroxisomal (S)-2-hydroxy-acid oxidase GLO1
Zm00001d046440	0.776807	0.00112537	FscO		Zm00001d015960	1.38601	0.0101706	SGNH hydrolase-type esterase superfamily protein		Zm00001d007323	-1.17367	4.80023e-05	Disease resistance protein RPM1
Zm00001d019241	-0.358343	0.00112547	NA		Zm00001d004354	0.776034	0.0101862	CBS domain-containing protein CBSX1 chloroplastic		Zm00001d032457	-1.19798	4.80522e-05	Protein kinase domain containing protein
Zm00001d048151	3.71685	0.00112977	Glycosyl hydrolase family 10 protein		Zm00001d039387	-1.12227	0.0101871	SOUL heme-binding family protein		Zm00001d035303	-0.703598	4.88676e-05	F-box protein
Zm00001d003931	-1.06015	0.00113212	ACR4		Zm00001d031772	3.95408	0.0101883	Class I glutamine amidotransferase-like superfamily protein		Zm00001d002814	-0.644361	4.91934e-05	Polyprotein
Zm00001d046500	-0.982692	0.00113431	SPX domain-containing protein 1		Zm00001d029256	0.610465	0.0101959	Serine/arginine-rich SC35-like splicing factor SCL28		Zm00001d030937	0.50257	4.94762e-05	Protein kinase superfamily protein with octicosapeptide/Phox/Bem1p domain
Zm00001d006663	-1.34844	0.0011382	light harvesting complex A1		Zm00001d031464	-2.05979	0.0102282	NA		Zm00001d013651	-1.00368	4.96048e-05	Chlorophyll(ide) b reductase NOL chloroplastic
Zm00001d029720	-3.29436	0.00114105	ABC-type Co2+ transport system: permease component		Zm00001d025903	0.605527	0.0102431	Endosomal targeting BRO1-like domain-containing protein		Zm00001d032849	-1.34934	4.99149e-05	RING/U-box superfamily protein
Zm00001d003534	0.550818	0.00114168	Pentatricopeptide repeat-containing protein		Zm00001d041319	1.97943	0.0102701	nine-cis-epoxycarotenoid dioxygenase3		Zm00001d013658	-0.563166	5.01463e-05	Myosin-binding protein 7
Zm00001d006700	-0.667265	0.00114168	mTERF family protein		Zm00001d043898	1.72541	0.010351	NA		Zm00001d020343	0.552391	5.04447e-05	Probable acyl-activating enzyme 17 peroxisomal
Zm00001d018729	1.85579	0.00114168	BZIP transcription factor family protein		Zm00001d038698	-0.729932	0.0103569	Auxin response factor 3		Zm00001d017324	0.452313	5.06902e-05	Replication protein A 32 kDa subunit A
Zm00001d046921	0.755558	0.00114168	F-box protein AFR		Zm00001d028347	2.27935	0.0103827	Peroxidase 53		Zm00001d007167	1.65756	5.08462e-05	CBL-interacting serine/threonine-protein kinase 15
Zm00001d026471	-1.43605	0.00114168	UDP-glycosyltransferase 89B1		Zm00001d007924	2.99795	0.0104527	cytochrome P450 family 93 subfamily D polypeptide 1		Zm00001d046705	-2.13633	5.09836e-05	Dihydroflavonol-4-reductase
Zm00001d004407	-0.517518	0.00114325	Zinc finger CCCH domain-containing protein 59		Zm00001d042968	0.361097	0.0104527	Nuclear transcription factor Y subunit B-8		Zm00001d029702	1.77417	5.21367e-05	Glutathione S-transferase U16
Zm00001d019934	-0.808616	0.00114325	O-Glycosyl hydrolases family 17 protein		Zm00001d017698	-1.29881	0.0104527	Oligopeptide transporter 4		Zm00001d052591	2.27659	5.25957e-05	B3 domain-containing protein
Zm00001d016979	1.11418	0.00114814	prohibitin3		Zm00001d010758	-0.382286	0.0104738	homeobox1		Zm00001d008841	-3.56697	5.32008e-05	17.8 kDa class II heat shock protein
Zm00001d032434	-0.597878	0.00115226	Mitochondrial import inner membrane translocase subunit TIM23-3		Zm00001d002053	0.589164	0.0104937	Small RNA degrading nuclease 3		Zm00001d045269	0.885476	5.32008e-05	Multidrug resistance-associated protein3
Zm00001d033040	1.02605	0.00115317	Shewanella-like protein phosphatase 1		Zm00001d053626	-1.12152	0.0105082	SPX domain-containing protein 1		Zm00001d008429	0.371775	5.35165e-05	Paired amphipathic helix protein Sin3-like 3
Zm00001d049979	0.491325	0.00115451	EMB2733/ESP3 (EMBRYO DEFECTIVE 2733); ATP-dependent RNA helicase		Zm00001d045735	0.633494	0.0105731	Zinc finger protein CONSTANS-LIKE 1		Zm00001d018490	-1.025	5.40612e-05	Pentatricopeptide repeat-containing protein mitochondrial
Zm00001d025167	0.771402	0.00115451	WPP domain-associated protein		Zm00001d012816	0.55726	0.0105854	Probable carbohydrate esterase		Zm00001d011644	1.72051	5.41228e-05	ABC transporter B family member 9
Zm00001d019624	-0.524508	0.00115586	NA		Zm00001d018773	2.27075	0.0105999	Transcription factor JUNGBRUNNEN 1		Zm00001d017881	-0.450405	5.41578e-05	ADP-ribosylation factor GTPase-activating protein AGD12
Zm00001d010805	-1.49112	0.00115586	Putative WRKY DNA-binding domain superfamily protein		Zm00001d008690	0.814365	0.0106303	Putative RING zinc finger domain superfamily protein		Zm00001d024872	-1.28922	5.41578e-05	THAUMATIN-LIKE PROTEIN 1
Zm00001d026695	-0.769364	0.00115586	Protein NRT1/ PTR FAMILY 5.10		Zm00001d014025	1.08673	0.0107334	Cyclase family protein		Zm00001d038368	0.442258	5.41747e-05	Peptidyl-prolyl cis-trans isomerase
Zm00001d017900	-0.884386	0.00117039	Dof zinc finger protein DOF5.4		Zm00001d004371	-2.94014	0.0108532	Senescence-specific cysteine protease SAG12		Zm00001d007773	0.846093	5.46304e-05	AAA-ATPase ASD mitochondrial
Zm00001d050521	-0.884241	0.00117407	Eukaryotic aspartyl protease family protein		Zm00001d014868	0.732596	0.0108532	NA		Zm00001d019439	0.408007	5.5357e-05	Dehydrogenase/reductase SDR family member 2
Zm00001d050708	-0.369533	0.00117407	Transducin/WD40 repeat-like superfamily protein		Zm00001d038071	0.627539	0.0110416	Protein N-terminal glutamine amidohydrolase		Zm00001d026437	2.13503	5.54811e-05	alpha/beta-Hydrolases superfamily protein
Zm00001d037425	-0.76106	0.00117407	AT-hook motif nuclear-localized protein 10		Zm00001d011312	-1.34274	0.0110722	Putative leucine-rich repeat receptor-like protein kinase family protein		Zm00001d026736	1.6212	5.7246e-05	NA
Zm00001d000123	0.518712	0.00117407	NAD(P)-binding Rossmann-fold superfamily protein		Zm00001d035526	-1.0321	0.0110968	Kinesin-like protein KIN-5D		Zm00001d016746	2.27	5.7246e-05	Transducin/WD40 repeat-like superfamily protein
Zm00001d045098	-0.630837	0.00118436	BTB/POZ domain-containing protein NPY1		Zm00001d050081	0.553154	0.0111015	dentin sialophosphoprotein-related		Zm00001d000967	1.16985	5.77138e-05	NA
Zm00001d032156	0.537294	0.00119232	Omega-6 fatty acid desaturase chloroplastic		Zm00001d018739	3.9458	0.0111565	NA		Zm00001d046005	0.597954	5.78722e-05	Glycosyltransferase family 61 protein
Zm00001d051980	0.431178	0.00119339	Clathrin interactor EPSIN 2		Zm00001d038075	-5.32852	0.0111565	Zea mays ARGOS8		Zm00001d030770	0.399683	5.79657e-05	Diacylglycerol kinase 1
Zm00001d001571	0.181771	0.00120352	NA		Zm00001d038226	-2.14785	0.011159	sugars will eventually be exported transporter1b		Zm00001d054057	3.0543	5.80489e-05	nitrate transport2
Zm00001d012591	0.92677	0.00120361	Probable nucleoredoxin 1		Zm00001d039566	-2.57646	0.0111886	17.5 kDa class II heat shock protein		Zm00001d052244	1.15036	5.87121e-05	Exocyst complex component SEC6
Zm00001d027748	0.541665	0.00122074	Probable RNA helicase SDE3		Zm00001d044508	1.98506	0.0111886	Cysteine-rich receptor-like protein kinase 2		Zm00001d042135	1.9798	5.87456e-05	Amino-acid permease BAT1
Zm00001d041871	0.737172	0.00122347	AT4G04720 (E=5e-040) CPK21 | CPK21; ATP binding / calcium ion binding / calmodulin-dependent protein kinase/ kinase/ protein kinase/ protein serine/threonine kinase		Zm00001d010726	1.19404	0.0112057	NA		Zm00001d024939	-1.59618	5.89501e-05	Phosphoglycerate mutase-like protein
Zm00001d025166	0.775707	0.00123198	Putative quinone-oxidoreductase homolog chloroplastic		Zm00001d027812	-2.74871	0.0112154	Protein YLS3		Zm00001d010859	0.272877	5.99449e-05	Proline synthase co-transcribed bacterial homolog protein
Zm00001d033092	0.987937	0.00123611	Alpha-soluble NSF attachment protein 2		Zm00001d047203	-1.25568	0.0112154	NA		Zm00001d014304	-0.520544	6.07338e-05	HNH endonuclease domain-containing protein
Zm00001d009618	-0.699636	0.00123611	what's this factor1		Zm00001d020184	2.34116	0.0112907	protein kinase-related		Zm00001d026078	2.68004	6.15149e-05	F-box protein PP2-A13
Zm00001d048690	1.38222	0.00124734	Serine carboxypeptidase-like 50		Zm00001d032410	1.55975	0.0113959	NA		Zm00001d025354	1.26178	6.16674e-05	Beta-fructofuranosidase insoluble isoenzyme CWINV2
Zm00001d029102	-0.709844	0.00124851	Dormancy-associated protein homolog 3		Zm00001d007959	1.67167	0.0113959	NA		Zm00001d004231	-1.32766	6.20577e-05	NA
Zm00001d047526	-0.574676	0.00124851	Lung seven transmembrane receptor family protein		Zm00001d037550	2.05533	0.0114051	peroxidase 5		Zm00001d049625	-2.37402	6.21295e-05	Protein LSD1
Zm00001d017702	-1.03926	0.00124981	Probable transcription factor KAN2		Zm00001d043621	-1.78232	0.0114471	Phosphatase phospho1		Zm00001d039776	0.33561	6.21295e-05	PLAC8 family protein
Zm00001d044235	2.26719	0.00125666	NA		Zm00001d043284	-1.20658	0.0114504	Phosphoglycerate mutase-like family protein		ZeamMp050	1.02988	6.2327e-05	NA
Zm00001d025038	3.36335	0.0012646	Senescence-specific cysteine protease SAG12		Zm00001d012144	0.946103	0.0114504	4-coumarate--CoA ligase-like 9		Zm00001d015912	3.15468	6.24213e-05	sugars will eventually be exported transporter4c
Zm00001d033714	0.866602	0.00126833	Regulator of Vps4 activity in the MVB pathway protein		Zm00001d017380	1.45192	0.0114712	Membrane steroid-binding protein 1		Zm00001d002799	2.77802	6.25897e-05	Homeobox-leucine zipper protein ATHB-12
Zm00001d046718	-0.762357	0.00126833	bZIP transcription factor 60		Zm00001d023735	-1.04894	0.0115005	Nitrilase-associated protein		Zm00001d042828	1.79811	6.28561e-05	NA
Zm00001d021452	0.598134	0.0012719	BZIP transcription factor		Zm00001d030037	-1.26599	0.0115952	Replication factor C subunit 3		Zm00001d016522	-1.69174	6.31593e-05	NA
Zm00001d009057	2.29209	0.00127535	Pectin lyase-like superfamily protein		Zm00001d003087	-0.555037	0.0116601	CLIP-associated protein		Zm00001d045041	-1.0225	6.31593e-05	Phosphoinositide phosphatase SAC2
Zm00001d050551	0.285436	0.00127569	ubiquitin-associated (UBA)/TS-N domain-containing protein		Zm00001d024943	1.27583	0.0116601	Putative cytochrome P450 superfamily protein		Zm00001d039935	-3.31157	6.52837e-05	heat shock protein17.2
Zm00001d028576	0.907275	0.00128687	fringe-related protein		Zm00001d000038	-1.59692	0.0116645	Serine/threonine-protein kinase D6PKL1		Zm00001d046803	-0.707993	6.54631e-05	Protein POLAR LOCALIZATION DURING ASYMMETRIC DIVISION AND REDISTRIBUTION
Zm00001d029460	-1.24604	0.00128687	Ids4-like protein		Zm00001d036262	1.08222	0.0116673	Protein kinase superfamily protein		Zm00001d028481	0.387876	6.56223e-05	topless-related2
Zm00001d015098	-0.49681	0.00128687	NA		Zm00001d033047	-2.05067	0.0116873	SPX domain-containing protein 3		Zm00001d031602	-0.817783	6.56223e-05	Uridine kinase-like protein 2 chloroplastic
Zm00001d018682	2.35401	0.00128687	Os07g0120600 protein		Zm00001d052050	-0.29098	0.0117917	Nudix hydrolase 3		Zm00001d053513	-1.18676	6.56223e-05	UDP-glycosyltransferase 72B1
Zm00001d042585	0.653542	0.001288	Protein root UVB sensitive 6		Zm00001d012338	0.734478	0.0118109	Coronatine-insensitive protein 1		Zm00001d010711	0.3575	6.56223e-05	Transcription initiation factor IIF beta subunit
Zm00001d022457	-2.69153	0.001288	peroxidase3		Zm00001d037214	-0.618365	0.0118109	Putative ARM repeat-containing protein containing family protein		Zm00001d002934	1.24283	6.56726e-05	NAC domain-containing protein 30
Zm00001d008690	-0.739806	0.001288	Putative RING zinc finger domain superfamily protein		Zm00001d038191	1.01706	0.0118228	Homeodomain-like superfamily protein		Zm00001d013638	1.04462	6.58025e-05	Cation/calcium exchanger 2
Zm00001d038724	-0.588064	0.001288	Cyclic phosphodiesterase		Zm00001d025146	2.00582	0.0118517	NA		Zm00001d028408	-2.63303	6.58375e-05	heat shock protein26
Zm00001d051156	-0.739705	0.00128863	Putative phosphoenolpyruvate carboxylase kinase family protein		Zm00001d031135	0.79945	0.0119168	GATA zinc finger family protein		Zm00001d019171	2.95292	6.6004e-05	isopentenyl transferase4
Zm00001d047356	0.504843	0.00129088	MADS-box transcription factor 56		Zm00001d013175	-1.18932	0.0119168	NA		Zm00001d046574	-0.574258	6.65294e-05	NA
Zm00001d047951	0.571121	0.00129887	Senescence/dehydration-associated protein-related		Zm00001d042005	1.06074	0.0119404	Amino acid kinase family protein		Zm00001d017129	-0.491844	6.70189e-05	NA
Zm00001d003851	-0.290223	0.0013034	Probable alpha-amylase 2		zma-MIR156d	1.47007	0.0119404	NA		Zm00001d041746	2.78869	6.81142e-05	Pinoresinol reductase 2
Zm00001d003174	-0.968785	0.00130573	NAD(P)-binding Rossmann-fold superfamily protein		ENSRNA049997330	1.47007	0.0119404	NA		Zm00001d030544	0.86338	6.82933e-05	Glyoxylate reductase
Zm00001d005884	-0.683484	0.00130573	ABSCISIC ACID-INSENSITIVE 5-like protein 5		Zm00001d006752	0.769015	0.0119554	FRIGIDA-like protein 3		Zm00001d003083	0.362733	6.82933e-05	Isocitrate dehydrogenase
Zm00001d014280	0.225189	0.00130622	RNA-binding (RRM/RBD/RNP motifs) family protein		Zm00001d011650	0.4751	0.0119997	VIP1 protein		Zm00001d001582	1.37047	6.85298e-05	NA
Zm00001d034604	-0.504274	0.00130956	KH domain-containing protein SPIN1		Zm00001d047442	2.33038	0.0120286	Putative mitochondrial transcription termination factor family protein		Zm00001d024018	-0.933131	6.88886e-05	P-loop containing nucleoside triphosphate hydrolases superfamily protein
Zm00001d014347	-0.536737	0.00130956	H(+)-ATPase 5		Zm00001d003784	-1.33304	0.012043	Glucan endo-13-beta-glucosidase 14		Zm00001d016696	1.02698	7.03594e-05	alpha/beta-Hydrolases superfamily protein
Zm00001d040301	0.269119	0.00131154	Zinc finger CCCH domain-containing protein 58		Zm00001d005688	1.98618	0.0120571	UDP-glycosyltransferase 90A1		Zm00001d034125	0.19765	7.13265e-05	Casein kinase II subunit alpha-2
Zm00001d014272	-0.431163	0.00131264	NA		Zm00001d007885	1.03735	0.0120571	Glutaredoxin family protein		Zm00001d041422	-2.00507	7.18528e-05	CBL-interacting serine/threonine-protein kinase 4
Zm00001d002761	1.40112	0.00131315	Ethylene-responsive transcription factor ERF105		Zm00001d017247	1.53406	0.0121048	Protein binding protein		Zm00001d014615	1.31732	7.25725e-05	xyloglucan endotransglycosylase homolog1
Zm00001d006838	-0.885903	0.00131431	40S ribosomal protein S3-1		Zm00001d009501	3.76167	0.0121048	NA		Zm00001d039343	-0.583304	7.31664e-05	NA
Zm00001d044071	1.19933	0.00131431	NA		Zm00001d023675	4.05162	0.0121048	NA		Zm00001d002607	-1.61418	7.34541e-05	Fasciclin-like arabinogalactan protein 10
Zm00001d003616	-0.551534	0.00132277	Zinc finger CCCH domain-containing protein 28		Zm00001d042603	0.544361	0.0121183	NA		Zm00001d028397	-0.522527	7.45519e-05	Acyl-CoA-binding domain-containing protein 3
Zm00001d028720	-1.04675	0.00132474	Phosphatidylinositol transfer protein expressed		Zm00001d008398	-0.933613	0.0121183	NA		Zm00001d038974	-1.52994	7.52938e-05	alpha/beta-Hydrolases superfamily protein
Zm00001d032685	0.685077	0.00132474	Pleckstrin homology (PH) and lipid-binding START domains-containing protein		Zm00001d050747	-0.906253	0.0121405	T-complex protein 11		Zm00001d029366	1.98646	7.59002e-05	Transducin/WD40 repeat-like superfamily protein
Zm00001d033062	2.27176	0.00132474	Transparent testa 12 protein		Zm00001d038012	-0.471357	0.0121405	DUF538 family protein		Zm00001d011133	1.42386	7.59002e-05	Putative WRKY DNA-binding domain superfamily protein
Zm00001d019472	0.439225	0.00132474	Calcium-dependent lipid-binding (CaLB domain) family protein		Zm00001d021949	1.31373	0.0121522	BTB/POZ domain-containing protein		Zm00001d036651	-0.443711	7.63603e-05	F10K1.23
Zm00001d008596	0.330617	0.00134062	Vacuolar sorting protein 4b		Zm00001d045563	-1.07114	0.0122063	dwarf plant3		Zm00001d047559	1.40002	7.69049e-05	Putative homeobox DNA-binding domain superfamily protein
Zm00001d048389	0.991138	0.00134589	Xyloglucan galactosyltransferase MUR3		Zm00001d053753	0.688936	0.0122272	calmodulin binding protein2		Zm00001d009057	2.62729	7.699e-05	Pectin lyase-like superfamily protein
Zm00001d048835	-0.530188	0.00135029	Phosphatidate phosphatase PAH2		Zm00001d018983	0.731854	0.0122272	Serine/threonine-protein kinase WNK2		Zm00001d043549	-1.03978	7.70106e-05	Harpin-induced protein
Zm00001d008381	2.36491	0.00135095	Putative cytochrome P450 superfamily protein		Zm00001d040246	0.805091	0.0122552	NA		Zm00001d032968	0.592559	7.74291e-05	Tetrapyrrole (Corrin/Porphyrin) Methylases
Zm00001d002373	0.400467	0.00135118	26S proteasome non-ATPase regulatory subunit 1 homolog B		Zm00001d050132	1.07184	0.0124585	bri1-like receptor kinase3		Zm00001d033551	1.4131	7.74291e-05	Phosphoglycerate mutase-like family protein
Zm00001d036778	1.63468	0.00135559	NA		Zm00001d051871	0.676439	0.0124585	RING/U-box superfamily protein		Zm00001d027703	-0.901169	7.77565e-05	L-ornithine N5-acetyltransferase NATA1
Zm00001d034857	0.315986	0.00135732	Monothiol glutaredoxin-S14 chloroplastic		Zm00001d019317	-1.03159	0.0124585	Cellulose synthase-8		Zm00001d014614	1.31524	7.77565e-05	Probable xyloglucan endotransglucosylase/hydrolase protein 21
Zm00001d049525	2.12371	0.00137214	LOL1/ LOL1 isoform 1/ LOL1 isoform 2		Zm00001d048868	1.23047	0.0124691	14-3-3-like protein GF14 epsilon		Zm00001d000006	1.90309	7.7894e-05	Germin-like protein subfamily 1 member 11
Zm00001d049416	-0.420707	0.00137477	Polyadenylate-binding protein RBP45C		Zm00001d051850	0.43077	0.0124691	Peptidase S24/S26A/S26B/S26C family protein		Zm00001d009797	1.49162	7.80403e-05	Lactoylglutathione lyase / glyoxalase I family protein
Zm00001d010630	1.40398	0.00137477	SKU5 similar 13		Zm00001d053151	1.16032	0.0124752	Putative POX domain/homeobox DNA-binding domain family protein		Zm00001d032162	1.7069	7.84367e-05	Temperature-induced lipocalin-1
Zm00001d035922	-0.534339	0.00137933	Pentatricopeptide repeat-containing protein chloroplastic		Zm00001d048521	-0.976392	0.0124838	peptidoglycan-binding LysM domain-containing protein		Zm00001d045883	1.84531	7.85689e-05	Sodium/hydrogen exchanger
Zm00001d021930	0.682811	0.00138533	UDP-galactose transporter 2		Zm00001d038034	-0.927375	0.0125366	NA		Zm00001d023269	1.14316	7.87745e-05	VQ
Zm00001d042804	0.753367	0.00139465	RNA polymerase II C-terminal domain phosphatase-like 2		Zm00001d045804	1.12485	0.0125366	Zinc finger protein CONSTANS-LIKE 9		Zm00001d033882	1.54524	7.88474e-05	Lecithin-cholesterol acyltransferase-like 1
Zm00001d004784	0.544804	0.00139861	Protein TPLATE		Zm00001d029717	0.959746	0.0125768	Protein LAZ1 homolog 2		Zm00001d046811	1.56026	7.97742e-05	Helminthosporium carbonum susceptibility2
Zm00001d045395	-1.02801	0.00140166	Sugar transport protein 3		Zm00001d025660	0.366148	0.0125788	Ras-related protein2		Zm00001d011418	1.30043	8.03617e-05	cytochrome P450 family 72 subfamily A polypeptide 8
Zm00001d045778	-1.16244	0.00140166	Embryogeneis transmembrane protein		Zm00001d017932	0.93808	0.0126023	Agamous-like MADS-box protein AGL16		Zm00001d029373	2.80932	8.12212e-05	Serine carboxypeptidase-like 40
Zm00001d045141	-1.21157	0.00140977	2-oxoglutarate (2OG) and Fe(II)-dependent oxygenase superfamily protein		Zm00001d019518	-1.99143	0.0126119	Photosystem I reaction center subunit IV A		Zm00001d024523	0.554271	8.12212e-05	Ramosa 1 enhancer locus 2/ Ramosa1 enhancer locus2
Zm00001d024857	0.184442	0.00142204	Discordia 1/ Discordia1		Zm00001d010172	1.11824	0.0126242	Fructose-16-bisphosphatase cytosolic		Zm00001d037232	1.94247	8.19543e-05	ATP-dependent zinc metalloprotease FTSH 6 chloroplastic
Zm00001d053626	-0.998582	0.00142765	SPX domain-containing protein 1		Zm00001d021288	1.2954	0.012682	Senescence-inducible chloroplast stay-green protein 1		Zm00001d032218	1.66223	8.22073e-05	Agamous-like MADS-box protein AGL16
Zm00001d045894	0.310028	0.00143191	CDK5RAP3-like protein		Zm00001d010440	-1.58455	0.0128364	sugars will eventually be exported transporter3a		Zm00001d008904	-0.4887	8.25487e-05	NA
Zm00001d044228	-2.01689	0.00143439	thiamine biosynthesis2		Zm00001d040712	-0.293801	0.0128535	Protein GFS12		Zm00001d011228	0.903414	8.38262e-05	Putative calmodulin-binding family protein
Zm00001d007832	-1.42283	0.00143503	Bifunctional inhibitor/lipid-transfer protein/seed storage 2S albumin superfamily protein		Zm00001d017886	-1.00706	0.012869	Nucleotide/sugar transporter family protein		Zm00001d045396	-1.18934	8.4332e-05	NA
Zm00001d029383	-1.18986	0.00143707	WAT1-related protein		Zm00001d042134	2.23752	0.0128767	Amino-acid permease BAT1		Zm00001d005535	-1.14248	8.46685e-05	Bifunctional aspartokinase/homoserine dehydrogenase 2: chloroplastic Aspartokinase Homoserine dehydrogenase
Zm00001d041751	-0.492167	0.0014444	NA		Zm00001d012290	-1.42105	0.0128767	hemerythrin HHE cation-binding domain protein		Zm00001d038717	-0.811785	8.50783e-05	Seed specific protein Bn15D17A
Zm00001d003430	-0.422997	0.00144839	Tyrosine--tRNA ligase chloroplastic/mitochondrial		Zm00001d005451	-1.02185	0.0129102	Cellulose synthase A catalytic subunit 5		Zm00001d024602	-0.447605	8.54637e-05	TMPIT-like protein
Zm00001d021627	-0.819997	0.00145265	senescence regulator		Zm00001d010970	0.534615	0.0129102	Isovaleryl-CoA dehydrogenase mitochondrial		Zm00001d036436	3.98362	8.62606e-05	NA
Zm00001d025017	-0.462895	0.0014624	NA		Zm00001d045610	0.975071	0.0129102	Homogentisate 12-dioxygenase		zma-MIR399a	-2.77513	8.65722e-05	NA
Zm00001d052545	-1.41749	0.00147185	NA		Zm00001d023385	2.33756	0.0130186	phytosulfokine4		ENSRNA049997262	-2.77513	8.65722e-05	NA
Zm00001d013242	0.47913	0.00147185	Ankyrin repeat family protein		Zm00001d043838	0.810909	0.0130637	Transparent testa 12 protein		Zm00001d039976	-0.906273	8.68896e-05	NA
Zm00001d048545	0.292768	0.00147185	P-loop containing nucleoside triphosphate hydrolases superfamily protein		Zm00001d034594	-0.818841	0.0130986	BRCA1 C Terminus domain containing protein expressed; Expressed protein; protein		Zm00001d025055	2.30736	8.71773e-05	protein phosphatase homolog11
Zm00001d031617	0.558527	0.0014724	sulfite oxidase1		Zm00001d025200	2.63828	0.0130986	Putative cytochrome P450 superfamily protein		Zm00001d022089	1.25603	8.75611e-05	EGG APPARATUS-1 protein
Zm00001d008733	0.566753	0.00148051	ABC transporter C family member 3		Zm00001d051620	-0.589468	0.0131047	AT-hook motif nuclear-localized protein 29		Zm00001d014203	0.531905	8.76309e-05	F-box/kelch-repeat protein SKIP11
Zm00001d053561	-0.567044	0.00148967	Pentatricopeptide repeat-containing protein mitochondrial		Zm00001d048180	0.453624	0.0131092	transcription initiation factor1		Zm00001d021745	-0.949472	8.8253e-05	CYCD6
Zm00001d043502	0.281306	0.00149379	Golgin candidate 1		Zm00001d031451	-1.66975	0.0131164	SBP-domain protein 5		Zm00001d008617	0.292355	8.8253e-05	Transcription elongation factor (TFIIS) family protein
Zm00001d026301	-0.358498	0.00149913	Protein FAR1-RELATED SEQUENCE 5		Zm00001d008997	-0.357567	0.0131557	Putative VHS/GAT domain containing family protein		Zm00001d030034	-0.520647	8.86857e-05	glucose-inhibited division family A protein
Zm00001d029106	-0.3497	0.00151257	Peter Pan-like protein		Zm00001d038104	-0.569547	0.0131557	Mannosylglycoprotein endo-beta-mannosidase		Zm00001d050148	-0.598592	8.8761e-05	Putative leucine-rich repeat protein kinase family protein
Zm00001d010445	-0.745565	0.00151257	Abscisic acid receptor PYL9		Zm00001d019896	-1.82005	0.0132123	NA		Zm00001d040048	0.738856	8.87807e-05	NA
Zm00001d006853	2.89212	0.00152259	Protein STRICTOSIDINE SYNTHASE-LIKE 6		Zm00001d018111	-0.502693	0.0132146	F-box protein FBW2		Zm00001d037713	-0.929655	8.94224e-05	Protein MARD1
Zm00001d021646	0.300812	0.00153426	Phospholipase A I		Zm00001d038180	-1.10229	0.0132146	Protein NRT1/ PTR FAMILY 3.1		Zm00001d000191	0.355586	8.94451e-05	E3 ubiquitin-protein ligase UPL6
Zm00001d031760	-1.07315	0.00154411	Clathrin assembly protein		Zm00001d052765	0.636299	0.0132184	TUB-transcription factor 7		Zm00001d010987	-1.45563	8.96558e-05	rap2.7 orthologue
Zm00001d015344	-0.428617	0.00154411	Biotin--protein ligase 1 chloroplastic		Zm00001d028199	-1.28374	0.0132286	Beta-glucosidase 40		Zm00001d002797	-0.643683	8.98646e-05	Metal-nicotianamine transporter YSL2
Zm00001d011785	-2.46446	0.00154663	Transcription factor LUX		Zm00001d002794	-1.65078	0.0132293	WRKY36-superfamily of TFs having WRKY and zinc finger domains		Zm00001d020339	0.920703	9.07235e-05	glycosyl hydrolase family 81 protein
Zm00001d020982	-1.31409	0.00154727	NAC domain containing protein 38		Zm00001d042101	1.66741	0.013238	NA		Zm00001d018983	0.761746	9.07706e-05	Serine/threonine-protein kinase WNK2
Zm00001d008966	1.7595	0.00154727	Serine/threonine-protein kinase		Zm00001d042555	-0.502873	0.013238	Zinc-binding dehydrogenase family protein		Zm00001d048298	-0.458555	9.11529e-05	exostosin family protein
Zm00001d045086	1.03084	0.00154727	Putative leucine-rich repeat receptor-like protein kinase family protein		Zm00001d018698	0.896506	0.0133724	Homeodomain-like superfamily protein		Zm00001d044542	-0.89138	9.20556e-05	NA
Zm00001d031669	-0.445206	0.00155391	O-fucosyltransferase family protein		Zm00001d032781	1.13432	0.0134541	NA		Zm00001d006374	0.520238	9.2343e-05	Probable inactive purple acid phosphatase 1
Zm00001d043181	-0.638727	0.00155391	NA		Zm00001d021299	-0.694996	0.0134541	Phosphatase DCR2		Zm00001d007530	0.512334	9.35263e-05	Protein phosphatase 2C family protein
Zm00001d008308	0.85891	0.00155563	Putative NAC domain transcription factor superfamily protein		Zm00001d041180	1.59676	0.0135217	Protein ENHANCED DOWNY MILDEW 2		Zm00001d032545	-1.07064	9.3696e-05	Formin-like protein 6
Zm00001d007180	-0.840705	0.00155578	Cytochrome P450 714A1		Zm00001d007781	2.39138	0.0135298	(Z)-3-hexen-1-ol acetyltransferase		Zm00001d020965	-0.739796	9.3696e-05	Proton pump-interactor 1
Zm00001d007531	-0.80595	0.00155877	Pentatricopeptide repeat-containing protein mitochondrial		Zm00001d021899	-0.795705	0.0135658	alpha/beta-Hydrolases superfamily protein		Zm00001d025541	-1.19628	9.3696e-05	Eukaryotic aspartyl protease family protein
Zm00001d002018	1.81903	0.00156751	Os07g0120600 protein		Zm00001d041416	-0.656214	0.0135735	Auxin-responsive protein IAA14		Zm00001d008847	0.313882	9.38292e-05	nucleosome/chromatin assembly factor D110
Zm00001d010410	-1.92173	0.0015717	tonoplast intrinsic protein4		Zm00001d031484	-1.34836	0.013622	PsbP domain-containing protein 3 chloroplastic		Zm00001d043805	0.609414	9.39503e-05	zinc finger protein-related
Zm00001d000230	1.01396	0.00157302	Protease Do-like 5 chloroplastic		Zm00001d052122	1.01763	0.0136337	NA		Zm00001d035428	-1.30812	9.40134e-05	Zinc finger (C3HC4-type RING finger) family protein
Zm00001d042948	-0.739943	0.00157408	Protein binding protein		Zm00001d001896	0.862982	0.0136337	Probable phytol kinase: chloroplastic		Zm00001d018758	0.458439	9.40556e-05	succinate dehydrogenase1
Zm00001d021845	-0.665923	0.00157638	NA		Zm00001d013765	-0.383984	0.0136401	SMAD/FHA domain-containing protein		Zm00001d032601	-1.61474	9.49169e-05	ABC transporter G family member 11
Zm00001d003434	0.612997	0.00157967	Galactose mutarotase-like superfamily protein		Zm00001d002666	-2.76919	0.0136788	ATP-dependent DNA helicase		Zm00001d028170	-1.32441	9.52962e-05	Dopamine beta-monooxygenase
Zm00001d042307	-1.79246	0.00158276	NA		Zm00001d029814	-2.62934	0.0137235	Xyloglucan endotransglucosylase/hydrolase protein 32		Zm00001d007181	-1.13525	9.52962e-05	Calcium-binding protein CML42
Zm00001d029133	0.314414	0.0015859	Nuclear cap-binding protein subunit 1		Zm00001d015095	-0.626998	0.0137882	Chlorophyll A-B binding family protein		Zm00001d045948	0.931785	9.54591e-05	Protein DETOXIFICATION 16
Zm00001d019305	0.402124	0.0015859	NA		Zm00001d049573	-3.3862	0.0138174	cytochrome P450 family 87 subfamily A polypeptide 6		Zm00001d005547	-0.765847	9.56289e-05	Protein PHR1-LIKE 3
Zm00001d012515	0.696563	0.0015859	proline-rich family protein		Zm00001d024403	1.57151	0.0138283	OSJNBa0041A02.21 protein; protein		Zm00001d036112	2.61324	9.58176e-05	Leucine carboxyl methyltransferase
Zm00001d048649	3.1179	0.00160392	Expressed protein; protein		Zm00001d031487	-0.514623	0.0138319	SBP-transcription factor16		Zm00001d011433	-0.73479	9.60097e-05	Protein kinase superfamily protein
Zm00001d042993	0.748371	0.00161897	Protein ESKIMO 1		Zm00001d018220	1.88005	0.0138548	glutathione transferase24		Zm00001d024700	-1.09262	9.60097e-05	NA
Zm00001d033999	1.4841	0.00161991	C-8 sterol isomerases		Zm00001d033187	-0.769588	0.0138709	Glycerophosphoryl diester phosphodiesterase		Zm00001d048013	1.23496	9.65377e-05	Calcium uniporter protein 4 mitochondrial
Zm00001d034038	-0.753247	0.0016252	Phytochrome		Zm00001d034659	0.317239	0.0138709	Nucleotide-diphospho-sugar transferases superfamily protein		Zm00001d013154	-0.8058	9.67334e-05	Auxin-responsive protein
Zm00001d029008	-0.425917	0.00162782	O-fucosyltransferase family protein		Zm00001d011605	0.303188	0.0138709	Transcription initiation factor TFIID subunit 11: mRNA		Zm00001d017087	-1.44726	9.68757e-05	V-type proton ATPase subunit E3
Zm00001d044476	-1.37411	0.00162969	ABC transporter G family member 10		Zm00001d016189	-4.5842	0.0139661	Dirigent		Zm00001d032855	0.820924	9.74131e-05	ABC transporter G family member 24
Zm00001d036216	-0.590607	0.0016305	F-box protein MAX2		Zm00001d027405	1.10047	0.0139857	heavy metal associated1		Zm00001d015361	-0.97314	9.74672e-05	Transducin/WD40 repeat-like superfamily protein
Zm00001d037439	-1.32255	0.00163521	ZCN11/ ZCN11 isoform 1/ ZCN11 isoform 2		Zm00001d037118	-2.23659	0.0140623	Anthocyanin biosynthesis regulatory protein Pl1_B73/ Purple plant1		Zm00001d017791	0.622111	9.77706e-05	Phosphoribulokinase / Uridine kinase family
Zm00001d004115	-0.961977	0.00164349	NA		Zm00001d039451	1.10637	0.0140739	Ribonuclease III family protein		Zm00001d020589	-2.75212	9.77706e-05	DUF581 family protein
Zm00001d032342	-3.09631	0.00164593	Protein kinase superfamily protein		Zm00001d042875	1.70835	0.0140739	NA		Zm00001d038577	0.869339	9.77706e-05	Probable glucan endo-13-beta-glucosidase BG1
Zm00001d034888	2.43643	0.00165717	Probable WRKY transcription factor 14		Zm00001d038440	0.496234	0.0141272	ribonuclease P family protein		Zm00001d026237	-1.6138	9.77706e-05	Protein BREVIS RADIX
Zm00001d003652	-0.420011	0.00165717	Protein EI24 homolog		Zm00001d024607	-2.94312	0.0141272	Ae3/ Ae3 protein/ Androgenic embryo3		Zm00001d013399	-1.22557	9.88437e-05	myb domain protein 52
Zm00001d047420	-1.31357	0.00165717	DUF679 domain membrane protein 2		Zm00001d000072	-1.38883	0.014199	Protein NRT1/ PTR FAMILY 8.3		Zm00001d014003	-0.741151	9.92069e-05	RING/U-box superfamily protein
Zm00001d042695	0.863014	0.0016616	Serine/threonine-protein kinase SRK2A		Zm00001d049165	-1.05785	0.0142335	Squamosa promoter-binding-like protein 18		Zm00001d021655	1.60087	9.92069e-05	WAT1-related protein
Zm00001d000686	-1.62356	0.0016616	NA		Zm00001d007677	0.280641	0.0142335	Sister-chromatid cohesion protein 3		Zm00001d037198	1.3884	9.92069e-05	LMBR1-like membrane protein
Zm00001d007548	-0.824363	0.00166599	Pentatricopeptide repeat-containing protein mitochondrial		Zm00001d021505	-0.386799	0.0142335	Spindle and kinetochore-associated protein 1 homolog		Zm00001d038328	0.588985	9.92069e-05	alpha/beta-Hydrolases superfamily protein
Zm00001d021961	0.766458	0.00166843	Alpha-L-fucosidase 3		Zm00001d046718	0.814577	0.0142335	bZIP transcription factor 60		Zm00001d024204	2.82839	9.92069e-05	LHT1
Zm00001d009401	0.27361	0.00166843	DNAJ heat shock N-terminal domain-containing protein		Zm00001d015217	-3.24745	0.0142644	Salicylate/benzoate carboxyl methyltransferase		Zm00001d021525	1.59341	9.99066e-05	FAD/NAD(P)-binding oxidoreductase family protein
Zm00001d051564	-0.818596	0.00167374	Soluble inorganic pyrophosphatase 2		Zm00001d024009	0.707948	0.014274	Chaperone protein ClpC1 chloroplastic		Zm00001d042058	0.393951	9.99449e-05	SART-1 family protein DOT2
Zm00001d035664	0.866531	0.00167374	Putative amino acid selective channel family protein		Zm00001d007016	1.23155	0.0143264	Disease resistance protein RGA2		Zm00001d040112	-1.23033	0.000100131	NA
Zm00001d029149	-0.699012	0.00167591	Zinc finger protein CONSTANS-LIKE 13		Zm00001d014085	0.289465	0.0143296	Nucleotide binding protein		Zm00001d010640	0.919987	0.000100772	F-box protein
Zm00001d034828	0.630993	0.00167706	Nucleic acid-binding proteins superfamily		Zm00001d016219	1.08051	0.0143876	receptor like protein 7		Zm00001d039729	0.383639	0.000101196	Transcription initiation factor TFIID subunit 4b
Zm00001d042686	-0.390062	0.00167738	Protein SENSITIVE TO PROTON RHIZOTOXICITY 1		Zm00001d049510	-1.3418	0.0143968	Putative cellulose synthase-like family protein		Zm00001d029180	0.427703	0.000101368	DNA helicase INO80
Zm00001d034834	-0.448601	0.00168229	Serine/threonine-protein kinase MHK		Zm00001d047584	2.07781	0.0144191	Eukaryotic aspartyl protease family protein		Zm00001d013212	2.23003	0.000102624	Peroxidase 16
Zm00001d051951	0.308026	0.00168229	casein kinase I		zma-MIR399g	-3.83776	0.0144873	NA		Zm00001d040178	-0.473144	0.000103913	RER1A protein
Zm00001d002775	0.491749	0.00168229	NA		ENSRNA049997266	-3.83776	0.0144873	NA		Zm00001d018930	-1.44818	0.000106048	Protein tesmin/TSO1-like CXC 2
Zm00001d004231	-1.1186	0.00168229	NA		Zm00001d032617	0.38461	0.0144921	Nucleic acid binding protein		Zm00001d013678	-0.644078	0.000106798	NA
Zm00001d040589	1.5433	0.00168229	Polygalacturonase		Zm00001d047476	-0.639264	0.0145044	Probable E3 ubiquitin-protein ligase RHC1A		Zm00001d039495	-1.07701	0.000106835	Zinc finger CCCH domain-containing protein 23
Zm00001d043280	-0.628649	0.00168229	Regulator of chromosome condensation (RCC1) family protein		Zm00001d000633	-1.9018	0.0145226	NA		Zm00001d015224	3.55545	0.000108115	Salicylate/benzoate carboxyl methyltransferase
Zm00001d014166	1.35318	0.00168229	Putative calcium-transporting ATPase 13 plasma membrane-type		Zm00001d036206	-2.9859	0.0145313	ATP-dependent 6-phosphofructokinase 3		Zm00001d028947	-2.03704	0.000108495	NA
Zm00001d016883	2.49896	0.00168229	CASP-like protein		Zm00001d031561	-0.659347	0.0145665	Transcription factor bHLH62		Zm00001d047911	-1.56913	0.000108495	HVA22-like protein i
Zm00001d011891	0.378404	0.00168229	S-formylglutathione hydrolase		Zm00001d045539	-1.19415	0.0146231	Acyl-CoA-binding protein		Zm00001d031778	4.51839	0.000108689	Carbonic anhydrase
Zm00001d038137	-3.68466	0.00168229	Germin-like protein subfamily 2 member 1		Zm00001d031450	0.500219	0.0146334	D111/G-patch domain-containing protein		Zm00001d043989	-1.12198	0.000108689	F-box/kelch-repeat protein
Zm00001d038377	0.643862	0.00168229	PIF / Ping-Pong family of plant transposases		Zm00001d044548	-0.688248	0.0146334	DNA-damage-repair/toleration protein DRT102		Zm00001d045139	-0.807256	0.000108689	vacuolar proton pump homolog1
Zm00001d047105	0.445875	0.00168229	Oxysterol-binding protein-related protein 2A		Zm00001d038404	-0.502565	0.0146473	Ypt/Rab-GAP domain of gyp1p superfamily protein		Zm00001d010988	-1.52719	0.000108797	NA
Zm00001d041403	-3.12406	0.0016867	NA		Zm00001d046151	1.86236	0.0146473	Putative RING zinc finger domain superfamily protein		Zm00001d017886	-1.06561	0.000109031	Nucleotide/sugar transporter family protein
Zm00001d024531	0.86454	0.0016867	Putative cellulose synthase-like family protein		Zm00001d033446	2.08783	0.0146663	Zinc transporter 7		Zm00001d003072	-1.17416	0.000109133	Receptor-like serine/threonine-protein kinase ALE2
Zm00001d013301	-0.373432	0.00168692	Sec23/Sec24 protein transport family protein		Zm00001d022886	1.35729	0.0146743	NA		Zm00001d006328	0.368666	0.000109693	Transmembrane 9 superfamily member 9
Zm00001d005766	-0.617419	0.00169868	Calmodulin-like protein		Zm00001d046949	-0.580898	0.0146775	Haloacid dehalogenase-like hydrolase (HAD) superfamily protein		Zm00001d022264	-0.85224	0.000109693	proteolipid membrane potential regulator5
Zm00001d003676	2.54114	0.00170324	Cellulose synthase-like protein B3		Zm00001d042533	-1.06737	0.0147343	Trigger factor		Zm00001d013390	0.892524	0.000110221	Glucan endo-1:3-beta-glucosidase 7
Zm00001d005727	0.724471	0.00170594	Plant UBX domain-containing protein 2		Zm00001d013255	-1.86189	0.0147678	NA		Zm00001d053740	0.909924	0.000111086	Uncharacterised conserved protein UCP015417 vWA
Zm00001d012838	-0.321461	0.00170685	DCD (Development and Cell Death) domain protein		Zm00001d041004	-1.50177	0.0148073	Lysine histidine transporter-like 8		Zm00001d027366	0.937291	0.000112179	peroxisomal membrane protein homolog1
Zm00001d016230	-0.816132	0.00170685	ADP:ATP carrier protein		Zm00001d007285	2.98536	0.0149497	NADP-dependent alkenal double bond reductase P2		Zm00001d034948	-0.690043	0.000112216	TRAM LAG1 and CLN8 (TLC) lipid-sensing domain containing protein
Zm00001d047252	2.4567	0.00170713	NA		Zm00001d010675	-0.49597	0.0149603	Metacaspase-6		Zm00001d031772	3.87467	0.000112348	Class I glutamine amidotransferase-like superfamily protein
Zm00001d032422	-1.42856	0.00171634	Dormancy-associated protein 1		Zm00001d038905	-0.690411	0.0149794	Probable beta-14-xylosyltransferase IRX10L		Zm00001d028557	-1.63345	0.000114302	17.4 kDa class I heat shock protein
Zm00001d004857	0.310687	0.00171634	Transcription factor VIP1		Zm00001d018532	0.534903	0.0149983	NA		Zm00001d051906	-1.11417	0.000114302	Tumor protein/ Tumor-related protein
Zm00001d035303	-0.584084	0.00171829	F-box protein		Zm00001d014447	1.05347	0.0150297	Serine carboxypeptidase-like 19		Zm00001d044092	-0.785091	0.000115821	NA
Zm00001d003471	-1.25431	0.00171846	Sugar transport protein 5		Zm00001d027908	2.20212	0.0150322	Probable flavin-containing monooxygenase 1		Zm00001d017391	-2.77682	0.000115985	Axial regulator YABBY 1
Zm00001d019555	-0.704757	0.00172573	Two-component response regulator ARR3		Zm00001d012138	1.92848	0.015137	Protein NRT1/ PTR FAMILY 8.1		Zm00001d015123	-0.524966	0.000116489	SINA2/ Ubiquitin ligase SINAT2
Zm00001d007015	-0.784762	0.00172594	EF hand family protein		Zm00001d013094	0.282876	0.0151438	BTB/POZ and MATH domain-containing protein 4		Zm00001d008645	1.71123	0.000117876	Lectin-like protein
Zm00001d032423	-1.42754	0.00172939	dormancy associated1		Zm00001d026040	3.47732	0.0151566	E3 ubiquitin-protein ligase PUB23		Zm00001d035000	2.15501	0.00011954	seed maturation protein
Zm00001d052943	0.267849	0.00172939	Ubiquitin carboxyl-terminal hydrolase 13		Zm00001d021915	0.774874	0.0151988	Major facilitator superfamily protein		Zm00001d019721	-0.72038	0.000119811	Triacylglycerol lipase 1
Zm00001d039657	-1.14706	0.00174108	NA		Zm00001d042809	-0.582649	0.0153032	Auxin transporter-like protein 1		Zm00001d053247	-0.806465	0.000121218	lipase class 3 family protein
Zm00001d010494	2.37563	0.00174108	NA		Zm00001d029707	-1.57269	0.0154655	Glutathione S-transferase GST 38		Zm00001d044452	-0.994783	0.000121983	NA
Zm00001d021729	0.549548	0.0017579	kinase interacting kinase1		Zm00001d029721	-1.50693	0.0155046	Probable serine/threonine-protein kinase		Zm00001d043328	0.446355	0.000122716	Lipoyl synthase 2: chloroplastic
Zm00001d046155	-0.756884	0.00176857	PLASMODESMATA CALLOSE-BINDING PROTEIN 5		Zm00001d026203	-1.57342	0.0155333	Putative MYB DNA-binding domain superfamily protein		Zm00001d013005	0.614382	0.000122716	RING/U-box superfamily protein
Zm00001d025325	-2.40838	0.00177449	NA		Zm00001d014625	-0.967715	0.0156242	Cell Division Protein AAA ATPase family		Zm00001d012444	2.06139	0.000122716	NA
Zm00001d041511	-0.694608	0.00177473	Heparanase-like protein 1		Zm00001d029706	2.93597	0.0156367	glutathione transferase39		Zm00001d038706	-1.2239	0.000124013	NA
Zm00001d045913	-1.72353	0.00177473	NA		Zm00001d034853	-0.563909	0.0156367	NA		Zm00001d019217	0.527585	0.00012485	ABC2 homolog 13
Zm00001d030285	1.51752	0.00177692	Probable alpha-mannosidase		Zm00001d002934	1.14788	0.0156367	NAC domain-containing protein 30		Zm00001d028510	-0.970361	0.000124885	Protein FAF-like chloroplastic
Zm00001d031863	0.244785	0.00177692	Mediator of RNA polymerase II transcription subunit 15a		Zm00001d036382	-2.12454	0.0156666	Transcription factor bHLH93		Zm00001d021647	1.63175	0.000124885	ABC transporter G family member 34
Zm00001d051585	-1.26104	0.00177692	NA		Zm00001d041590	1.20743	0.0156763	Boron transporter 1		Zm00001d012267	0.397619	0.000124885	NPL4-like protein 1
Zm00001d040449	0.41992	0.00177692	protein kinase C substrate heavy chain-related		Zm00001d012307	-1.24236	0.0156763	Nucleobase-ascorbate transporter 12		Zm00001d049406	2.9015	0.000125469	DNA-directed RNA polymerases II IV and V subunit 12
Zm00001d040958	-0.537534	0.00177692	glucose-inhibited division family A protein		Zm00001d034877	0.898612	0.0157206	Protein BREVIS RADIX		Zm00001d015121	0.41756	0.00012648	ADP-ribosylation factor B1B
Zm00001d037239	0.48533	0.00177692	glycine-rich protein		Zm00001d005028	0.912383	0.0157206	NAC domain-containing protein 77		Zm00001d007195	-1.17619	0.000126939	Alpha-L-arabinofuranosidase 1
Zm00001d038763	2.11488	0.00177692	UDP-glycosyltransferase 88A1		Zm00001d034277	2.19977	0.0157329	Transcription factor JUNGBRUNNEN 1		Zm00001d042558	0.834563	0.000128354	TPR repeat-containing protein ZIP4
Zm00001d046784	2.26589	0.00177692	Alpha carbonic anhydrase 7		Zm00001d033528	-0.770907	0.0157774	Protein NRT1/ PTR FAMILY 2.9		Zm00001d012770	-0.52247	0.000128936	Putative translation elongation factor family protein
Zm00001d024379	0.467448	0.00177692	Xyloglucan endotransglucosylase/hydrolase protein 2		Zm00001d031807	-1.31416	0.0158022	NA		Zm00001d008893	0.282695	0.000129338	Shaggy-related protein kinase iota
Zm00001d014016	-1.29702	0.00177697	Cytokinin riboside 5'-monophosphate phosphoribohydrolase LOG3		Zm00001d000986	-1.25835	0.0158022	NA		Zm00001d003859	3.31698	0.000129641	Potassium transporter 5
Zm00001d027714	-0.4508	0.00178149	ribosomal large subunit pseudouridine synthase B		Zm00001d054010	1.29286	0.0158422	NA		Zm00001d026541	0.572259	0.000130093	SWIB complex BAF60b domain-containing protein
Zm00001d027976	0.783513	0.00178149	GLABRA2 expression modulator		Zm00001d014344	0.515768	0.0159274	P-loop containing nucleoside triphosphate hydrolases superfamily protein		Zm00001d032672	-1.77684	0.000130392	NA
Zm00001d031220	-0.789914	0.00178182	14-dihydroxy-2-naphthoyl-CoA thioesterase 1		Zm00001d035214	-1.62872	0.0159274	Ureide permease 5		Zm00001d007529	0.487563	0.000130692	Protein phosphatase 2C family protein
Zm00001d032187	0.787803	0.00178313	Malate dehydrogenase		Zm00001d014796	0.718881	0.0159563	NEP1-interacting protein-like 1		Zm00001d032368	1.32508	0.00013199	Protein SAR DEFICIENT 1
Zm00001d031434	-0.854898	0.00178664	DNA-damage-repair/toleration protein DRT100		Zm00001d037233	-0.714381	0.0159781	Beta-13-galactosyltransferase GALT1		Zm00001d000122	-0.646151	0.000132753	forkhead-associated domain-containing protein / FHA domain-containing protein
Zm00001d042665	0.880995	0.00179778	Transcription repressor MYB6		Zm00001d006570	-1.5937	0.0159987	NA		Zm00001d012561	1.23997	0.000132906	Cystatin2/ Cysteine proteinase inhibitor/ Putative cystatin
Zm00001d016388	-0.731303	0.00179778	Endoplasmic reticulum vesicle transporter protein		Zm00001d011632	-0.347512	0.0159987	Cytidyltransferase isoform 1/ Cytidyltransferase isoform 2		Zm00001d047125	2.27528	0.00013316	Pectin acetylesterase 9
Zm00001d018683	1.8454	0.00179778	Os07g0120600 protein		Zm00001d044538	-1.39339	0.0160066	NA		Zm00001d023779	1.51406	0.000133807	3-hydroxyisobutyryl-CoA hydrolase 1
Zm00001d014017	-0.735954	0.00180021	NA		Zm00001d037518	-0.340324	0.0160066	DCD (Development and Cell Death) domain protein		Zm00001d030063	3.51675	0.000134081	NA
Zm00001d049449	-0.76721	0.00180458	cold regulated protein homolog1		Zm00001d021804	1.305	0.0160181	Internal alternative NAD(P)H-ubiquinone oxidoreductase A1 mitochondrial		Zm00001d049432	2.185	0.000134081	Germin-like protein subfamily 1 member 8
Zm00001d033047	-1.80955	0.00181168	SPX domain-containing protein 3		Zm00001d007173	-0.640941	0.0160374	B3 domain-containing transcription repressor VAL2		Zm00001d002938	-0.422948	0.000134081	Histone-lysine N-methyltransferase SUVR4
Zm00001d005629	1.57846	0.00181168	Sulfite exporter TauE/SafE family protein		Zm00001d030277	1.78308	0.0160725	Enoyl-		Zm00001d011819	1.38133	0.000134081	Chlorophyllide a oxygenase chloroplastic
Zm00001d038730	-0.911935	0.00182711	calcineurin B-like2		Zm00001d031257	1.00514	0.0160725	Cupredoxin superfamily protein		Zm00001d037626	-0.462194	0.000134081	Serine/threonine protein phosphatase 2A 57 kDa regulatory subunit B' iota isoform
Zm00001d003924	-1.1165	0.00183132	Glycerophosphodiester phosphodiesterase GDPD2		Zm00001d050190	0.489634	0.0160725	NA		Zm00001d049438	1.76816	0.00013539	Germin-like protein subfamily 1 member 8
Zm00001d017086	-1.56888	0.00183459	NA		Zm00001d053776	-0.484427	0.0160725	Succinate-semialdehyde dehydrogenase mitochondrial		Zm00001d044052	-1.75027	0.00013539	Phospholipase A1-IIgamma
Zm00001d021656	-1.45424	0.00183459	Nodulin-like protein		Zm00001d015519	-0.9982	0.0160725	RNA-binding (RRM/RBD/RNP motifs) family protein		Zm00001d052139	-2.61742	0.000135726	Nitrate reductase
Zm00001d012789	-1.64031	0.00183908	Putative WRKY DNA-binding domain superfamily protein		Zm00001d011243	0.274509	0.0160839	Coiled-coil domain-containing protein		Zm00001d036398	2.1108	0.000135726	leucine-rich receptor-like kinase family protein
Zm00001d016140	2.35463	0.00183913	E3 ubiquitin-protein ligase ATL41		Zm00001d011752	2.01378	0.0160839	NA		Zm00001d047220	0.923543	0.000136483	Serine/threonine-protein kinase SRK2C
Zm00001d046422	0.699497	0.00184216	Cytochrome P450 734A1		Zm00001d042609	1.18655	0.0161514	NAC domain-containing protein 48/ NAC transcription factor		Zm00001d029324	0.630323	0.000136998	Cystathionine gamma-synthase 1 chloroplastic
Zm00001d032264	-1.00309	0.00184277	U-box domain-containing protein 40		Zm00001d047057	-0.657149	0.0161779	NA		Zm00001d037894	2.43231	0.000138133	Dehydrin DHN1
Zm00001d048686	-0.47809	0.00184427	NA		Zm00001d028709	-0.665993	0.016188	ascorbate peroxidase homolog3		Zm00001d049038	0.43326	0.00013824	mRNA capping enzyme family protein
Zm00001d039426	0.838922	0.00185144	Beta-glucuronosyltransferase GlcAT14B		Zm00001d013676	0.884301	0.016188	Nuclear transcription factor Y subunit A-10		Zm00001d026190	-0.792713	0.000138423	DeSI-like protein
Zm00001d036771	-2.11673	0.00185635	Protein kinase superfamily protein		Zm00001d004048	-2.12702	0.0161996	Xanthoxin dehydrogenase		Zm00001d012307	-1.32349	0.00013874	Nucleobase-ascorbate transporter 12
Zm00001d019405	3.52585	0.00186497	Acidic endochitinase		Zm00001d023950	-1.02477	0.016252	Glucuronoxylan 4-O-methyltransferase 2		Zm00001d045295	1.37428	0.000139128	ACS-like protein/ Putative AMP-dependent synthetase and ligase superfamily protein
Zm00001d012522	0.604385	0.001866	Calcium uniporter protein 5 mitochondrial		Zm00001d020583	-1.18573	0.0162935	Galactosyltransferase family protein		Zm00001d033286	-1.96764	0.000139129	Phenylalanine ammonia-lyase 1
Zm00001d043586	-1.88344	0.00188001	NA		Zm00001d011802	-1.45767	0.0162935	Histone-lysine N-methyltransferase ATXR5		Zm00001d028533	-0.328495	0.000139472	Calcium ion binding protein
Zm00001d027874	-0.771598	0.00188731	nuclear transcription factor y subunit a1		Zm00001d027461	-0.762866	0.0163543	DNA binding protein		Zm00001d018362	1.75747	0.000141503	Protein TSS
Zm00001d051316	-1.1235	0.00188872	Putative homeodomain-like transcription factor superfamily protein isoform 1/ Putative homeodomain-like transcription factor superfamily protein isoform 2		Zm00001d037367	-1.02595	0.0163543	O-fucosyltransferase family protein		Zm00001d004894	2.31756	0.000142116	ribulose bisphosphate carboxylase small subunit2
Zm00001d048028	-0.658891	0.00188936	Sec-independent protein translocase protein TATC chloroplastic		Zm00001d039116	-2.00041	0.0163543	AMP-dependent synthetase and ligase family protein		Zm00001d035162	1.58446	0.00014225	LHT1
Zm00001d027535	0.867908	0.00191416	Probable acyl-activating enzyme 1 peroxisomal		Zm00001d013319	-0.790474	0.0163822	Endoglucanase 25		Zm00001d044173	-2.6066	0.000142911	Probable desiccation-related protein LEA14
Zm00001d039368	1.95223	0.00191416	GDSL esterase/lipase		Zm00001d030053	0.799345	0.0165216	AT-hook motif nuclear-localized protein 13		Zm00001d015138	0.992824	0.000143089	NA
Zm00001d044773	-0.786158	0.00191416	Putative ARM repeat-containing protein containing family protein		Zm00001d050208	0.293362	0.0166109	Galactose mutarotase-like superfamily protein		Zm00001d047461	1.13792	0.000143484	Mitochondria fission 1 protein
Zm00001d007186	0.41669	0.0019167	Apyrase 1		Zm00001d021304	-0.882341	0.0167343	Endoglucanase 2		Zm00001d008795	1.15234	0.000144494	UDP-glycosyltransferase 74B1
Zm00001d012618	0.37311	0.00191979	VPS28-like protein		Zm00001d016140	-2.61764	0.01676	E3 ubiquitin-protein ligase ATL41		Zm00001d034721	0.605062	0.000146501	RNA helicase4
Zm00001d053313	0.962119	0.00192537	Protein phosphatase 2C and cyclic nucleotide-binding/kinase domain-containing protein		Zm00001d017729	-0.461941	0.0167883	Serine/threonine-protein kinase MHK		Zm00001d027732	-1.56945	0.000147859	Subtilisin-like serine endopeptidase family protein
Zm00001d036440	-0.674128	0.00193655	WAT1-related protein		Zm00001d010604	-0.33449	0.0168826	Sorting nexin 2B		Zm00001d038316	0.825248	0.000147983	NA
Zm00001d022937	-0.56331	0.00193812	NA		Zm00001d010754	-0.918386	0.0168847	NA		Zm00001d043166	1.20567	0.000148101	UDP-glycosyltransferase 87A1
Zm00001d034784	0.369134	0.00194877	Mitochondrial transcription termination factor family protein		Zm00001d008467	1.07269	0.0169054	Cysteine-rich receptor-like protein kinase 37		Zm00001d051174	1.75819	0.000148427	Aquaporin PIP2-3
Zm00001d009511	-0.402704	0.00195027	NA		Zm00001d030010	0.368029	0.0170587	NA		Zm00001d018181	-2.58558	0.00015188	flavonol synthase2
Zm00001d028174	-0.508298	0.00196241	NA		Zm00001d008826	0.956596	0.0170817	gigantea1		Zm00001d029087	1.70007	0.000153235	Sucrose synthase 3
Zm00001d005742	-2.16399	0.00196241	NA		Zm00001d047192	2.80865	0.0171229	5-pentadecatrienyl resorcinol O-methyltransferase		Zm00001d048142	0.758802	0.000153792	Formin-like protein 6
Zm00001d024957	2.38682	0.0019669	NA		Zm00001d007123	2.97473	0.0171916	FPF1-like protein 1		Zm00001d006084	0.31991	0.000154083	Uridine kinase
Zm00001d014617	1.76788	0.0019708	Xyloglucan endotransglucosylase/hydrolase protein 14		Zm00001d009440	0.348121	0.0172086	Anaphase-promoting complex subunit 10		Zm00001d034986	2.48371	0.000154384	Cytochrome P450 71A26
Zm00001d050436	-0.412568	0.0019846	DUF868 family protein		Zm00001d014459	-1.60629	0.0172647	cytochrome P450 family 77 subfamily B polypeptide 1		Zm00001d049734	0.548192	0.00015447	Putative 1-phosphatidylinositol-4-phosphate 5-kinase/ zinc ion binding family
Zm00001d025352	0.933844	0.00199053	Ferredoxin-3 chloroplastic		Zm00001d047162	-0.520688	0.0172647	UDP-Glycosyltransferase superfamily protein		Zm00001d029611	-0.649681	0.00015491	Arabinosyltransferase RRA3
Zm00001d026137	-0.777679	0.00199053	OSJNBa0084K11.10 protein; protein		Zm00001d051588	0.388426	0.0172699	RING-box protein 1a		Zm00001d041573	1.84683	0.000156138	protein kinase-related
Zm00001d002426	-1.04431	0.00199868	Thylakoid lumenal 29 kDa protein chloroplastic		Zm00001d007381	2.07199	0.0172968	NA		Zm00001d018046	-0.775368	0.000157	Protein POLLEN DEFECTIVE IN GUIDANCE 1
Zm00001d041675	2.24041	0.00199868	Calcium-binding protein CML38		Zm00001d019411	2.49738	0.0173396	L-type lectin-domain containing receptor kinase V.9		Zm00001d047640	-0.529291	0.000157445	thiaminase3
Zm00001d013109	0.81758	0.00199868	calcium-dependent protein kinase 10		Zm00001d001006	0.444503	0.0173472	NA		Zm00001d028241	-1.88888	0.000160385	3-ketoacyl-CoA synthase
Zm00001d013596	-1.04742	0.00199868	Acyl-CoA N-acyltransferases (NAT) superfamily protein		Zm00001d044434	-0.960373	0.0174043	Probable inactive receptor kinase		Zm00001d025834	-1.30053	0.000160743	Inositol transporter 4
Zm00001d008748	-0.488967	0.00199868	Putative DUF1767 domain containing protein		Zm00001d030159	-0.353795	0.0174295	Protein NRT1/ PTR FAMILY 8.3		Zm00001d023529	-0.832682	0.000161945	abscisic acid stress ripening1
Zm00001d024694	2.73168	0.00199868	receptor like protein 7		Zm00001d002422	-2.4755	0.0174476	Pectin acetylesterase 7		Zm00001d025867	-0.44078	0.00016199	NA
Zm00001d019048	-0.464867	0.00200418	SEC12-like protein 1		Zm00001d016653	0.342666	0.0175038	WD repeat-containing protein LWD1		Zm00001d028750	2.30813	0.000161993	asparagine synthetase3
Zm00001d048861	2.43611	0.00200448	Probable flavin-containing monooxygenase 1		Zm00001d041161	0.882267	0.0175049	NA		Zm00001d015033	-1.42224	0.000161993	phospholipase D17
Zm00001d016164	-0.405646	0.00200613	GW2		Zm00001d043093	-0.376162	0.0175049	Protein MOR1		Zm00001d041604	0.744841	0.000163483	bZIP transcription factor 53
Zm00001d027439	0.719311	0.00201174	ATP binding protein		Zm00001d028012	1.00483	0.0177014	Ras-related protein Rab-6A		Zm00001d045091	1.69226	0.000163483	Spermidine hydroxycinnamoyl transferase
Zm00001d007718	-1.16609	0.00201174	benzoxazinone synthesis13		Zm00001d038756	0.493256	0.0177014	Protein LIKE COV 1		Zm00001d024314	-1.74497	0.000163674	Putative cinnamyl-alcohol dehydrogenase family protein
Zm00001d007858	-1.16617	0.00202502	Pyridoxal reductase chloroplastic		Zm00001d000233	1.7234	0.0177014	Cation/H(+) antiporter 19		Zm00001d002830	1.64647	0.000164574	Beta-fructofuranosidase 1
Zm00001d037115	-0.63957	0.00203486	Choline/ethanolaminephosphotransferase 1		Zm00001d043146	0.617903	0.0177264	ribonuclease III domain protein1		Zm00001d005118	0.841786	0.000164574	Sec14p-like phosphatidylinositol transfer family protein
Zm00001d053883	-0.50518	0.00205557	DNA/RNA-binding protein Kin17 conserved region		Zm00001d009583	-0.945687	0.0177264	NA		Zm00001d006365	1.60687	0.000164574	Probable aldo-keto reductase 4
Zm00001d044878	0.283458	0.00205557	Chaperone protein dnaJ 1 mitochondrial		Zm00001d035467	-0.548503	0.0177913	Putative CRINKLY4-like receptor protein kinase family protein		Zm00001d040238	0.767083	0.000164574	Probable uridine nucleosidase 2
Zm00001d028588	-1.44785	0.00205606	Fes1B		Zm00001d002757	-1.2522	0.0178258	Protein kinase superfamily protein		Zm00001d044502	1.3239	0.000164574	Ubiquitin-conjugating enzyme family protein
Zm00001d044119	-0.978211	0.00205997	Cystathionine beta-synthase (CBS) family protein		Zm00001d014494	-2.57471	0.017848	NA		Zm00001d048229	-2.05331	0.000164574	Putative HLH DNA-binding domain superfamily protein
Zm00001d017152	0.936142	0.0020789	endochitinase precursor4		Zm00001d012694	0.309179	0.017848	Putative HCNGP-related transcriptional regulator family protein		Zm00001d045044	0.499891	0.000166592	AP2-EREBP-transcription factor 160
Zm00001d028540	-0.519154	0.00208196	Josephin-2		Zm00001d035057	1.17621	0.0178714	HXXXD-type acyl-transferase family protein		Zm00001d013094	0.291277	0.000166874	BTB/POZ and MATH domain-containing protein 4
Zm00001d012782	-2.22772	0.00211214	UDP-glycosyltransferase 88A1		Zm00001d037115	-0.695074	0.0178714	Choline/ethanolaminephosphotransferase 1		Zm00001d019345	2.11999	0.000167289	Late embryogenesis abundant protein group 2
Zm00001d027850	-0.692743	0.0021135	P-loop containing nucleoside triphosphate hydrolases superfamily protein		Zm00001d032359	0.300747	0.0179348	Multiprotein-bridging factor 1a		Zm00001d027976	0.884754	0.00016754	GLABRA2 expression modulator
Zm00001d013423	3.07451	0.00211479	Mitogen-activated protein kinase kinase 9		Zm00001d048669	-1.42704	0.0179578	Auxin-induced beta-glucosidase/ Putative O-Glycosyl hydrolase superfamily protein		Zm00001d047043	-0.657666	0.000169996	Chaperone DnaJ-domain superfamily protein
Zm00001d036006	-0.477129	0.00211479	NA		Zm00001d039548	-0.511122	0.0179751	Pentatricopeptide repeat-containing protein		Zm00001d052609	-0.918128	0.000170714	Expressed protein; protein
Zm00001d001841	-0.456854	0.00212913	NA		Zm00001d041518	-1.14752	0.0181604	Expressed protein; protein		Zm00001d027544	-0.523632	0.000171814	Ankyrin repeat protein
Zm00001d026035	-0.479286	0.00212913	AT-hook motif nuclear-localized protein 21		Zm00001d049377	-0.902664	0.0181695	General transcription factor 2-related zinc finger protein		Zm00001d019078	1.15255	0.000172851	AAA-ATPase ASD mitochondrial
Zm00001d003649	0.80437	0.00213059	OSJNBa0088K19.7 protein		Zm00001d030767	-1.53571	0.0182066	NA		Zm00001d019122	-2.2377	0.000172851	NA
Zm00001d047814	1.22872	0.00213059	Catalytic/ hydrolase		Zm00001d044390	-0.71647	0.0182066	Aspartyl protease family protein 2		Zm00001d052696	-0.646319	0.000172887	Probable protein S-acyltransferase 7
Zm00001d039341	0.577264	0.00213287	ethylene insensitive 2		Zm00001d004279	2.19309	0.0184204	18-cineole synthase 1 chloroplastic		Zm00001d007876	1.40314	0.000175583	nine-cis-epoxycarotenoid dioxygenase4
zma-MIR172d	1.44298	0.00213546	NA		Zm00001d043851	-0.895322	0.0184204	Long chain acyl-CoA synthetase 5		Zm00001d022628	-0.792757	0.000175583	R2R3MYB-domain protein
ENSRNA049997433	1.44298	0.00213546	NA		Zm00001d020134	2.13909	0.0184204	ABC transporter G family member 40		Zm00001d004250	1.98024	0.000175584	NA
Zm00001d042250	-0.448551	0.00213839	NAD(P)-binding Rossmann-fold superfamily protein		Zm00001d009600	-0.779285	0.0184204	Retrovirus-related Pol polyprotein LINE-1		Zm00001d052390	1.47201	0.000175625	Arabidopsis NAC domain containing protein 87
Zm00001d020609	0.921472	0.00213839	Riboflavin synthase-like superfamily protein		Zm00001d030191	1.14427	0.0184232	Homeobox-leucine zipper protein HAT3		Zm00001d049556	-0.864557	0.000175842	Putative oxysterol binding domain family protein
Zm00001d049806	1.72471	0.00214057	Ubiquitin carboxyl-terminal hydrolase		Zm00001d000919	1.2583	0.0184848	NA		Zm00001d018407	-0.811422	0.000175842	NA
Zm00001d014321	-0.322178	0.00214057	UTP:RNA uridylyltransferase 1		Zm00001d015616	1.21144	0.0184848	Leucine zipper protein-like; protein		Zm00001d052971	1.12184	0.000178347	Camelliol C synthase
Zm00001d038762	1.15589	0.00214636	respiratory burst oxidase3		Zm00001d053300	0.52436	0.0186089	NA		Zm00001d011994	0.32783	0.000179011	F-box only protein 6
Zm00001d006753	1.06564	0.00215481	Indole-3-acetic acid amido synthetase		Zm00001d004587	2.82218	0.0186259	40S ribosomal protein S4-3		Zm00001d027043	-0.825251	0.000180016	NA
Zm00001d047166	-0.586894	0.00215654	Cystathionine gamma-synthase 1 chloroplastic		Zm00001d027510	0.92456	0.0186276	Protein NLP2		Zm00001d035619	3.30699	0.000181224	Histone H2A
Zm00001d025938	-0.775406	0.00216592	calmodulin-related		Zm00001d040614	-0.591666	0.0186276	PIT1		Zm00001d003902	-0.509355	0.000182452	Polynucleotide adenylyltransferase family protein
Zm00001d001860	-0.651861	0.00217418	Haloacid dehalogenase-like hydrolase domain-containing protein		Zm00001d017969	1.60147	0.0186307	NA		Zm00001d008578	1.21161	0.000182452	Putative WRKY DNA-binding domain superfamily protein
Zm00001d005244	0.287873	0.00218305	G-box-binding factor 1		Zm00001d011124	0.731624	0.0186355	4Fe-4S binding domain containing protein expressed		Zm00001d007698	0.293991	0.000182579	AAA-type ATPase family protein
Zm00001d011787	-1.34473	0.00218305	Cysteine protease XCP1		Zm00001d006454	-1.08446	0.018723	Filament-like plant protein 3		Zm00001d018292	1.64281	0.000182902	NA
Zm00001d012770	-0.448134	0.00218305	Putative translation elongation factor family protein		Zm00001d011003	2.28255	0.018723	Loricrin		Zm00001d005283	4.37384	0.000182924	F8M12.18 protein
Zm00001d005453	0.343502	0.00218637	heteroglycan glucosidase 1		Zm00001d016924	4.30596	0.0187548	ETHYLENE INSENSITIVE 3-like 5 protein		Zm00001d019565	2.25168	0.000182924	Aquaporin PIP2-6
Zm00001d010449	-1.96298	0.00218637	NA		Zm00001d012067	-0.509813	0.0187625	Transcription factor bHLH62		Zm00001d018742	3.28859	0.000183794	rough sheath1
Zm00001d037499	0.464465	0.00218637	Thioredoxin H9		Zm00001d046569	-0.632726	0.0188058	Protein kinase superfamily protein with octicosapeptide/Phox/Bem1p domain		Zm00001d002338	-0.868693	0.000183985	UDP-N-acetylglucosamine diphosphorylase 2
Zm00001d028654	0.549511	0.00219526	Trifunctional UDP-glucose 46-dehydratase/UDP-4-keto-6-deoxy-D-glucose 35-epimerase/UDP-4-keto-L-rhamnose-reductase RHM2		Zm00001d029611	-0.606014	0.0188399	Arabinosyltransferase RRA3		Zm00001d010029	-0.339745	0.000184008	Cation-chloride cotransporter 1
Zm00001d031961	0.954274	0.00219526	Histidine-containing phosphotransfer protein 1		Zm00001d019933	1.92319	0.0188671	NA		Zm00001d053704	0.71973	0.000184103	Putative RING zinc finger domain superfamily protein
Zm00001d052850	-0.369994	0.00219526	F-box protein At-B		Zm00001d048142	0.714098	0.0189069	Formin-like protein 6		Zm00001d040185	0.376282	0.000184103	Iron-sulfur assembly protein IscA-like 1 mitochondrial
Zm00001d038089	-0.527584	0.00219698	Major facilitator superfamily protein		Zm00001d023516	-2.57383	0.0189247	Salt stress-induced protein		Zm00001d047166	-0.669603	0.00018459	Cystathionine gamma-synthase 1 chloroplastic
Zm00001d042350	-0.320684	0.00220083	RING/U-box superfamily protein		Zm00001d033590	-0.385256	0.0189397	Ribosomal L18p/L5e family protein		Zm00001d006585	1.41554	0.00018463	R2R3MYB-domain protein
Zm00001d016882	1.9826	0.00220083	NA		Zm00001d035766	1.98688	0.0189516	Protein NEN4		Zm00001d000800	-0.797792	0.000184679	NA
Zm00001d037724	1.18437	0.00221341	Gibberellin 2-beta-dioxygenase		Zm00001d052172	1.70505	0.0189897	EF hand family protein		Zm00001d043183	-0.490052	0.000185093	Probable E3 ubiquitin-protein ligase RHC1A
Zm00001d040118	-0.846507	0.00221695	Sarcoplasmic reticulum histidine-rich calcium-binding protein		Zm00001d003457	-0.769932	0.0189903	PLAT domain-containing protein 3		Zm00001d026513	-1.70548	0.000185977	Heavy metal transport/detoxification superfamily protein
Zm00001d006882	-0.822155	0.00222838	EF hand family protein		Zm00001d006467	-1.14207	0.0190713	adenosine 5'-phosphosulfate reductase-like2		Zm00001d001502	1.39484	0.000187388	NA
Zm00001d026521	0.501366	0.00222913	Inner membrane protease subunit 1		Zm00001d021296	-0.831549	0.0190713	myb domain protein 85		Zm00001d000301	-0.936697	0.000188711	exocyst subunit exo70 family protein G1
Zm00001d028244	1.03781	0.0022324	Outer arm dynein light chain 1 protein		Zm00001d010816	-0.857973	0.0190713	Inner membrane protein oxaA		Zm00001d018859	0.351492	0.00019013	Ubiquitin carboxyl-terminal hydrolase 13
Zm00001d003271	0.805054	0.00224013	Peptide methionine sulfoxide reductase		Zm00001d017189	-3.2123	0.0191789	Carboxypeptidase SOL1		Zm00001d053186	-2.71865	0.000190482	NA
Zm00001d043168	-2.00062	0.00224013	MAR-binding filament-like protein 1-1 isoform 2		Zm00001d018080	-0.865429	0.0191789	Probable beta-D-xylosidase 7		Zm00001d033795	0.299184	0.00019088	Dihydroxyacetone kinase
Zm00001d044052	-1.48011	0.00224013	Phospholipase A1-IIgamma		Zm00001d021370	-0.732658	0.0191789	Protein CURVATURE THYLAKOID 1B chloroplastic		Zm00001d013010	-0.448927	0.000192536	Peptidyl-prolyl cis-trans isomerase
Zm00001d018754	-0.554333	0.00224256	Probable LRR receptor-like serine/threonine-protein kinase		Zm00001d015126	-0.976179	0.0192006	response to low sulfur 3		Zm00001d052828	-1.82727	0.000192797	Salicylate/benzoate carboxyl methyltransferase
Zm00001d049020	-0.985549	0.00224643	O-methyltransferase ZRP4		Zm00001d017213	-0.826659	0.0192116	Phosphatidylinositol N-acetyglucosaminlytransferase subunit P-related		Zm00001d000561	-0.626368	0.000194646	NA
Zm00001d017103	-0.542997	0.00224643	transcription regulators		Zm00001d045359	0.819004	0.0192546	Mitogen-activated protein kinase kinase 2		Zm00001d009296	3.76907	0.00019475	Pathogenesis-related protein PRMS
Zm00001d045708	3.10991	0.00227518	Senescence-specific cysteine protease SAG12		Zm00001d014329	1.14979	0.0192616	NA		Zm00001d041697	0.576001	0.000195083	Cofactor-independent phosphoglycerate mutase
Zm00001d016134	1.46671	0.00227694	iron-sulfur protein1		Zm00001d024919	-0.501131	0.0192616	Adenylate kinase		Zm00001d014812	-0.311837	0.000196045	RNA-binding (RRM/RBD/RNP motifs) family protein
Zm00001d024755	0.589071	0.00227824	PTI1-like tyrosine-protein kinase 3		Zm00001d028984	1.65938	0.0193107	Myb-related protein 2		Zm00001d011752	2.0183	0.000197764	NA
Zm00001d034568	-0.300792	0.00229043	Major facilitator superfamily protein		Zm00001d031577	-1.54863	0.0193293	UDP-glucuronate 4-epimerase 1		Zm00001d002584	-2.08569	0.00019831	NA
Zm00001d029701	1.48055	0.00229573	glutathione transferase40		Zm00001d044175	-0.646792	0.0194446	Neutral/alkaline non-lysosomal ceramidase		Zm00001d012553	0.457222	0.00019831	octopine synthase binding factor4
Zm00001d051200	2.63888	0.00229573	Serine/threonine phosphatase family 2C		Zm00001d052244	1.04042	0.0195051	Exocyst complex component SEC6		Zm00001d030357	0.311004	0.000199011	Ubiquitin carboxyl-terminal hydrolase 10
Zm00001d003248	-0.886521	0.00229573	Acid phosphatase/vanadium-dependent haloperoxidase-related protein		Zm00001d019537	-2.96009	0.0196861	Inositol transporter 4		Zm00001d016920	0.438482	0.000200668	10A19I.15
Zm00001d002661	0.589518	0.0023011	NLP transcription factor		Zm00001d026306	0.544465	0.0196861	Putative leucine-rich repeat receptor-like protein kinase family protein		Zm00001d007947	0.290577	0.000202979	Protein LEO1 homolog
Zm00001d003935	-0.345101	0.0023011	NA		Zm00001d024903	-2.83764	0.0197334	heat shock protein 90 kDa		Zm00001d031432	-4.38479	0.000204226	NA
Zm00001d047812	0.471782	0.00232477	Oxysterol-binding protein-related protein 3B		Zm00001d008244	0.412407	0.019895	Isocitrate dehydrogenase		Zm00001d003513	2.24831	0.000204698	zeaxanthin epoxidase1
Zm00001d008999	1.14629	0.00233799	Thioesterase superfamily protein		Zm00001d029947	-1.95144	0.0199533	Protein BRANCHLESS TRICHOME		Zm00001d026638	-2.17211	0.000205773	Calcium-binding EF hand family protein
Zm00001d039345	-2.16088	0.00234183	Indole-3-acetic acid-amido synthetase GH3.6		Zm00001d013301	0.391316	0.0199533	Sec23/Sec24 protein transport family protein		Zm00001d005584	0.39298	0.000206019	Protein SAWADEE HOMEODOMAIN HOMOLOG 2
Zm00001d010856	1.10188	0.00234183	Peripheral-type benzodiazepine receptor		Zm00001d052628	-1.25372	0.0200051	Glycosyltransferase 6		Zm00001d021746	-1.16648	0.000206019	Octicosapeptide/Phox/Bem1p family protein
Zm00001d035682	-1.50244	0.00234183	Alpha-humulene/(-)-(E)-beta-caryophyllene synthase		Zm00001d030601	-0.349994	0.020052	alpha/beta-Hydrolases superfamily protein		Zm00001d034897	-1.45923	0.000208362	Plastid-specific 30S ribosomal protein 1
Zm00001d037605	-0.940628	0.00234183	GATA transcription factor 16		Zm00001d022493	-1.23388	0.0201217	alpha/beta-Hydrolases superfamily protein		Zm00001d017987	-1.13167	0.000208362	Microtubule-associated protein TORTIFOLIA1
Zm00001d018926	-1.24486	0.00234351	Bifunctional inhibitor/lipid-transfer protein/seed storage 2S albumin superfamily protein		Zm00001d038692	-1.66489	0.0201496	NA		Zm00001d012626	-1.42104	0.000208362	NA
Zm00001d027430	0.656071	0.00234769	Protein FIZZY-RELATED 1		Zm00001d015131	-0.85003	0.0202509	NA		Zm00001d042256	-0.811924	0.000208508	Protein kinase superfamily protein
Zm00001d044175	0.595086	0.00236442	Neutral/alkaline non-lysosomal ceramidase		Zm00001d029072	-1.04216	0.0202808	Potassium transporter 2		Zm00001d051988	-0.679298	0.000208972	PAP-specific phosphatase HAL2-like
Zm00001d009745	0.336894	0.00236442	DNA damage-binding protein 1a		Zm00001d009160	-1.63025	0.0202808	sequence-specific DNA binding transcription factors		Zm00001d002610	1.29649	0.000208972	cytochrome P450 family 704 subfamily A polypeptide 2
Zm00001d012333	-3.20535	0.00236442	HXXXD-type acyl-transferase family protein		Zm00001d046073	-0.849549	0.0202808	Protein trichome birefringence-like 26		Zm00001d042766	-0.884771	0.000208972	Expressed protein; protein
Zm00001d051787	0.898714	0.0023773	3-ketoacyl-CoA synthase		Zm00001d025699	1.02653	0.0202808	Nucleotide binding protein		Zm00001d034630	0.574442	0.000209633	Leukotriene A-4 hydrolase homolog
Zm00001d003148	-0.44981	0.0023773	Enhancer of rudimentary homolog		Zm00001d032605	-0.566487	0.0204077	Alpha-galactosidase 2		Zm00001d043390	-1.27499	0.000211706	delay of germination 1
Zm00001d018034	1.92532	0.0023773	geranylgeranyl hydrogenase1		Zm00001d044501	0.465684	0.0204695	NA		Zm00001d017086	-1.86594	0.000212064	NA
Zm00001d053819	-1.03427	0.00237815	Auxin response factor 6		Zm00001d025472	-0.829385	0.0204776	Two-component response regulator ARR16		Zm00001d010744	-0.358038	0.000212064	Gamma-glutamyl hydrolase 1
Zm00001d038761	-1.4281	0.00238168	Putative WRKY DNA-binding domain superfamily protein		Zm00001d051511	0.815713	0.0205808	PLATZ transcription factor family protein		Zm00001d030851	-1.24868	0.000212496	Cytochrome P450 CYP81N5
Zm00001d051695	-1.53337	0.00238474	Aspartyl protease AED1		Zm00001d054067	-0.930775	0.0205808	Probable inactive linolenate hydroperoxide lyase		Zm00001d036735	-1.08792	0.000213772	Protein kinase superfamily protein
Zm00001d006534	-0.542357	0.00238474	NA		Zm00001d039942	-1.68283	0.0205808	17.4 kDa class I heat shock protein		Zm00001d037279	0.216645	0.000213772	Dynamin-2A
Zm00001d028024	0.820194	0.00238612	Nodulin-related protein 1		Zm00001d033650	0.573214	0.0206998	Non-cyanogenic beta-glucosidase		Zm00001d038291	0.77712	0.000215443	Ferredoxin-6: chloroplastic
Zm00001d017186	0.487092	0.00239175	Shikimate O-hydroxycinnamoyltransferase		Zm00001d045391	-3.49557	0.0206998	early nodulin-related		Zm00001d052786	0.420715	0.000216329	Plant UBX domain-containing protein 11
Zm00001d035916	-0.995281	0.00240424	UMP/CMP kinase1		Zm00001d045432	3.58052	0.0207487	NA		Zm00001d035574	0.260346	0.000218702	E3 UFM1-protein ligase 1 homolog
Zm00001d034730	0.261608	0.00240428	Squamosa promoter-binding-like protein 1		Zm00001d027022	-2.00319	0.0207902	NA		Zm00001d023317	0.736315	0.000226693	NA
Zm00001d051130	1.47007	0.00240428	Long-chain-alcohol oxidase FAO4B		Zm00001d014341	-2.25146	0.0207902	Peroxidase 53		Zm00001d039029	1.3744	0.000230237	thiamine monophosphate synthase
Zm00001d010783	-0.469141	0.00240428	MPPN domain containing protein		Zm00001d017753	-0.771853	0.0207902	Carboxylic ester hydrolase		Zm00001d016098	2.99578	0.000232259	NA
Zm00001d023941	-1.24748	0.00240593	Carbohydrate transporter/ sugar porter		Zm00001d035854	2.26607	0.0209689	Alpha-dioxygenase 1		Zm00001d022613	-1.86884	0.000232259	Delayed flowering1
Zm00001d013093	-0.909998	0.00241005	Probable zinc metalloprotease EGY1 chloroplastic		Zm00001d013193	1.65843	0.0209846	CCG-binding protein 1		Zm00001d024789	1.80229	0.000232259	(Z)-3-hexen-1-ol acetyltransferase
Zm00001d039073	-0.626918	0.00241325	NA		Zm00001d021266	-1.19699	0.0209946	NA		Zm00001d039730	0.972047	0.000232673	Shaggy-related protein kinase alpha
Zm00001d029336	0.476643	0.00241399	Probable methyltransferase PMT2		Zm00001d002806	0.996902	0.0210073	B-box zinc finger protein 20		Zm00001d048947	1.92179	0.000233744	pathogenesis-related protein3
Zm00001d042049	1.66275	0.00241517	Ferredoxin		Zm00001d002158	-1.1636	0.0210473	Wound-responsive family protein		Zm00001d015960	1.30364	0.000233744	SGNH hydrolase-type esterase superfamily protein
Zm00001d016707	-1.28853	0.00241517	Heme-binding-like protein chloroplastic		Zm00001d042274	1.04982	0.0210496	Sec14p-like phosphatidylinositol transfer family protein		Zm00001d045050	-0.281728	0.000236905	Haloacid dehalogenase-like hydrolase (HAD) superfamily protein
Zm00001d049921	0.57068	0.00241688	NA		Zm00001d041972	1.04591	0.0210789	Cellulose synthase-like protein G3		Zm00001d012690	0.829416	0.000239538	Protein ABIL3
Zm00001d043209	0.938693	0.00241688	NA		Zm00001d018142	-2.05359	0.0211729	MADS-box protein SVP		Zm00001d023904	-0.476371	0.000241215	Auxin-binding protein 4
Zm00001d036036	-0.318521	0.00241905	Histone H3		Zm00001d014291	1.44633	0.0212133	Probable protein phosphatase 2C 71		Zm00001d031199	2.60636	0.00024185	EPIDERMAL PATTERNING FACTOR-like protein 2
Zm00001d007559	-0.794433	0.00242293	PPR-817		Zm00001d017084	-1.29624	0.0212133	NAC13 NAC type transcription factor		Zm00001d022161	0.729446	0.000243628	Putative paramyosin
Zm00001d036206	2.25538	0.00242745	ATP-dependent 6-phosphofructokinase 3		Zm00001d021519	-0.889297	0.0212133	Nucleobase-ascorbate transporter 11		Zm00001d025229	3.64088	0.000244397	NA
Zm00001d029540	-0.488887	0.00243544	F-box protein		Zm00001d039258	-1.43851	0.0212696	Triose phosphate/phosphate translocator TPT chloroplastic		Zm00001d028368	-0.857794	0.000245127	Purple acid phosphatase 1
Zm00001d012731	0.489374	0.00243573	Auxin response factor 3		Zm00001d044777	1.74497	0.0212734	DUF679 domain membrane protein 7		Zm00001d014017	-0.815415	0.000245929	NA
Zm00001d003281	-1.18746	0.00244958	Cellulase (glycosyl hydrolase family 5) protein		Zm00001d003939	0.849777	0.0212935	Probable metal-nicotianamine transporter YSL6		Zm00001d003124	-0.655586	0.000247456	DNA glycosylase superfamily protein
Zm00001d013911	0.428244	0.00245189	Malic enzyme		Zm00001d037607	1.15863	0.0213389	Probable WRKY transcription factor 50		Zm00001d035355	-4.12088	0.00024757	Disease resistance RPP13-like protein 4
Zm00001d047497	-0.490381	0.00246975	Protein LAZ1 homolog 1		Zm00001d013941	-0.952081	0.0213645	Pentatricopeptide repeat-containing protein chloroplastic		Zm00001d003981	0.986257	0.00024864	Drought-induced protein 1
Zm00001d016406	0.462326	0.00247082	NSP (nuclear shuttle protein)-interacting GTPase		Zm00001d011418	1.15994	0.0215087	cytochrome P450 family 72 subfamily A polypeptide 8		Zm00001d020642	0.321924	0.000253444	Serine carboxypeptidase-like 49
Zm00001d046194	0.360863	0.00247448	Probable phospholipid-transporting ATPase 7		Zm00001d033227	1.92826	0.0216028	NA		Zm00001d018177	-0.512819	0.000253445	NA
Zm00001d014258	0.886128	0.002477	alanine aminotransferase5		Zm00001d006944	0.747597	0.0216036	CBL-interacting serine/threonine-protein kinase 1		Zm00001d012047	-0.654008	0.000253589	Wiscott-Aldrich syndrome
Zm00001d034900	0.630667	0.00248276	PGR5-like protein 1B chloroplastic		Zm00001d012536	0.347	0.021673	Vacuolar protein sorting-associated protein 36		Zm00001d032536	-0.839416	0.000254964	Calcium uniporter protein 4 mitochondrial
Zm00001d030370	-0.338471	0.00248481	NA		Zm00001d051442	-1.30198	0.0216874	Probable methyltransferase PMT15		Zm00001d050885	2.35756	0.000256742	Beta-13-galactosyltransferase GALT1
Zm00001d049867	0.576012	0.00248554	Proline-rich family protein		Zm00001d053960	0.542748	0.0216874	3-isopropylmalate dehydratase large subunit		Zm00001d002235	-0.479479	0.000257785	NA
Zm00001d053102	-0.816874	0.00248593	Tubulin alpha-6 chain		Zm00001d018214	-0.919532	0.0216874	O-Glycosyl hydrolases family 17 protein		Zm00001d042099	1.73009	0.000258207	Glutathione S-transferase
Zm00001d002139	1.45707	0.00248611	Transferase		Zm00001d035020	1.02415	0.0216874	Cell wall / vacuolar inhibitor of fructosidase 2		Zm00001d049450	-0.676493	0.000258553	Zinc finger BED domain-containing protein DAYSLEEPER
Zm00001d039335	-1.40386	0.0024864	NA		Zm00001d046322	-0.748637	0.0217549	Putative FAD-binding Berberine family protein		Zm00001d029102	-0.759497	0.000259377	Dormancy-associated protein homolog 3
Zm00001d012400	-0.565145	0.00249745	Probable methyltransferase PMT10		Zm00001d001960	2.7535	0.0218542	Naringenin2-oxoglutarate 3-dioxygenase		Zm00001d034463	-1.50455	0.000260233	Aux/IAA-transcription factor5
Zm00001d023253	0.880632	0.00249745	L-type lectin-domain containing receptor kinase IX.1		Zm00001d009567	-1.03405	0.0218542	Fasciclin-like arabinogalactan protein 7		Zm00001d039565	-0.676946	0.000260287	NA
Zm00001d009171	1.8769	0.0025017	Mitochondrial substrate carrier family protein		Zm00001d042917	1.57651	0.0218686	Trihelix transcription factor ASIL2		Zm00001d043581	-1.77093	0.000260287	Subtilisin-like protease SBT5.6
Zm00001d014583	-1.45271	0.00251431	Protein kinase superfamily protein		Zm00001d045530	1.60537	0.0218686	Syntaxin-41		Zm00001d039548	-0.541056	0.000260356	Pentatricopeptide repeat-containing protein
Zm00001d035921	-0.576198	0.00251431	B3 domain-containing protein		Zm00001d029673	0.342943	0.0219092	F-box protein PP2-A13		Zm00001d011835	0.684961	0.000260863	NAD(H) kinase 1
Zm00001d027758	-0.649804	0.00251604	NA		Zm00001d019703	-0.483732	0.0219092	Na+/H+ antiporter: probable CP0838		Zm00001d053349	1.14418	0.000261204	uncharacterized protein
Zm00001d010675	0.438762	0.00251999	Metacaspase-6		Zm00001d048416	1.2607	0.0219092	FAD/NAD(P)-binding oxidoreductase family protein		Zm00001d040477	-0.683932	0.000261204	Cyclin-like F-box
Zm00001d043840	0.257996	0.00252623	Origin recognition complex subunit 4		Zm00001d024679	0.350081	0.0219092	Transcription factor ILR3		Zm00001d021784	-1.50056	0.000265741	Chlorophyll a-b binding protein of LHCII type III
Zm00001d028509	0.182918	0.00252952	Chaperone DnaJ-domain superfamily protein		Zm00001d045041	-0.896729	0.0220564	Phosphoinositide phosphatase SAC2		Zm00001d035063	-1.89903	0.000265741	GDSL esterase/lipase
Zm00001d050081	-0.482235	0.00252952	dentin sialophosphoprotein-related		Zm00001d028526	-1.40377	0.0220961	Scarecrow-like protein 26		Zm00001d051383	-0.722392	0.000266342	Vesicle-associated protein 1-3
Zm00001d042097	0.705882	0.00252952	Actin-interacting protein 1-2		Zm00001d035300	-1.70933	0.0220961	Heptahelical transmembrane protein 5		Zm00001d029648	1.92938	0.000266916	copalyl diphosphate synthase2
Zm00001d007450	-0.307994	0.00254431	NA		Zm00001d023987	-0.43601	0.0220961	La-related protein 6B		Zm00001d020686	1.95248	0.000268162	1-aminocyclopropane-1-carboxylate oxidase2
Zm00001d020266	1.4421	0.00254586	Chaperone protein dnaJ 20 chloroplastic		Zm00001d025747	-1.83637	0.0220961	Phosphoglycolate phosphatase 1A chloroplastic		Zm00001d013049	0.754466	0.000268763	Exocyst complex component EXO84B
Zm00001d034597	0.291162	0.00254855	PAPA-1-like conserved region family protein		Zm00001d033139	1.6691	0.0221189	Cytochrome P450 71D7		Zm00001d013625	-0.927118	0.000269673	LOB domain-containing protein 4
Zm00001d004868	-0.826763	0.00255101	Transcription factor LHW		Zm00001d033304	1.86435	0.0222086	Nucleotide binding protein		Zm00001d023225	-1.24837	0.000270699	Protein trichome birefringence-like 34
Zm00001d031213	1.57589	0.00256279	LigA		Zm00001d022454	-1.19109	0.0223737	F-box family protein		Zm00001d026147	-2.0757	0.000272334	plant color component at R1
Zm00001d039369	-0.442451	0.00256485	DUF455 family protein		Zm00001d017106	-0.793153	0.0224407	Actin-related protein 3		Zm00001d045097	0.956924	0.000273149	multidrug resistance-associated protein 11
Zm00001d002658	0.696099	0.00257138	Transducin/WD40 repeat-like superfamily protein		Zm00001d037446	0.501144	0.0225239	Protein decapping 5		Zm00001d044526	4.39702	0.000273483	Ran BP2/NZF zinc finger-like superfamily protein
Zm00001d034168	-0.609456	0.00257294	NA		Zm00001d053648	-0.621677	0.0225526	Sec14p-like phosphatidylinositol transfer family protein		Zm00001d051898	0.338988	0.000274366	Serine/threonine-protein phosphatase PP1
Zm00001d020953	-1.35517	0.00257659	Protein PIN-LIKES 3		Zm00001d008340	1.42866	0.0225526	alpha/beta-Hydrolases superfamily protein		Zm00001d037519	-1.71104	0.000274704	DCD (Development and Cell Death) domain protein
Zm00001d022478	-0.922437	0.00257659	Protein SRC2 homolog		Zm00001d040399	-0.79047	0.0225651	Peroxidase 24		Zm00001d052525	0.778619	0.000275401	Calmodulin binding protein/ Putative calmodulin-binding family protein
Zm00001d008496	-1.60073	0.00257659	Glycosyltransferase family 61 protein		Zm00001d030158	-0.87471	0.0225817	Protein NRT1/ PTR FAMILY 8.3		Zm00001d028366	-1.05651	0.000277239	Type IV inositol polyphosphate 5-phosphatase 9
Zm00001d047355	0.432686	0.00257659	Agamous-like MADS-box protein AGL14		Zm00001d034874	-0.772999	0.0225817	Expressed in cucumber hypocotyls		Zm00001d011319	1.9034	0.000277713	ABC transporter G family member 40
Zm00001d036410	-0.402139	0.00258193	P-loop containing nucleoside triphosphate hydrolases superfamily protein		Zm00001d053293	1.44727	0.0225817	calcineurin B-like12		Zm00001d038193	-0.402516	0.000278814	isopentenyl pyrophosphate isomerase3
Zm00001d034777	0.49342	0.00258522	Nicotinate phosphoribosyltransferase 2		Zm00001d017642	1.92137	0.0225817	Protein REVEILLE 1		Zm00001d049715	2.04873	0.000278945	IAA25-auxin-responsive Aux/IAA family member
Zm00001d005375	-1.3221	0.00258522	NA		Zm00001d021268	0.789011	0.0225817	Homeobox-leucine zipper protein ATHB-12		Zm00001d007379	-1.75599	0.000279894	CASP-like protein 1U2
Zm00001d042961	0.499303	0.00258586	respiratory burst oxidase1		Zm00001d038122	-0.862225	0.0225817	Peptide-N4-(N-acetyl-beta-glucosaminyl)asparagine amidase A protein		Zm00001d019123	0.504868	0.000281584	Survival protein SurE-like phosphatase/nucleotidase
Zm00001d052775	-0.846116	0.00258724	Expressed protein; protein		Zm00001d047497	0.524054	0.0225817	Protein LAZ1 homolog 1		Zm00001d030464	1.54572	0.000281889	Carbohydrate transporter/ sugar porter
Zm00001d005748	0.977279	0.00259916	CIPK-like protein 1		Zm00001d004555	-2.52941	0.0225928	cytochrome P450 family 93 subfamily D polypeptide 1		Zm00001d047764	-1.1176	0.000282197	Expressed protein; protein
Zm00001d038300	1.03704	0.00260486	Putative cytochrome P450 superfamily protein		Zm00001d029515	-0.50965	0.022679	ACT domain-containing protein ACR4		Zm00001d051567	-1.1798	0.000282768	alpha/beta-Hydrolases superfamily protein
Zm00001d041489	-0.487957	0.0026093	Homeobox-leucine zipper protein ATHB-14		Zm00001d044622	0.613657	0.0227076	F-box/LRR-repeat protein 3		ZeamMp151	1.25573	0.000285673	NA
Zm00001d044068	-0.93922	0.00263951	Molybdate transporter 2		Zm00001d025991	-0.904244	0.0227076	ELMO/CED-12 family protein		Zm00001d014386	-1.27764	0.000285846	Patatin-like protein 6
Zm00001d002978	-0.288554	0.00264474	RNA-binding (RRM/RBD/RNP motifs) family protein		Zm00001d034817	-0.398749	0.0227319	Serine/threonine protein phosphatase 2A 59 kDa regulatory subunit B' eta isoform		Zm00001d048703	-1.54157	0.000286312	benzoxazinone synthesis4
Zm00001d023176	-0.680822	0.00264474	NA		Zm00001d051063	-0.605919	0.0227319	Phosphatidyl-N-methylethanolamine N-methyltransferase		Zm00001d043944	1.1937	0.00028784	NA
Zm00001d045263	0.456405	0.00265638	Ubiquitin-associated/translation elongation factor EF1B protein		Zm00001d051914	-1.51392	0.0228497	NA		Zm00001d021818	2.19939	0.000288283	NAC transcription factor 25
Zm00001d027329	-0.338285	0.00266857	DNA (cytosine-5)-methyltransferase DRM2		Zm00001d027861	0.643141	0.0228622	Alanine--glyoxylate aminotransferase 2 homolog 1 mitochondrial		Zm00001d048281	2.54695	0.00028837	Protein LURP-one-related 6
Zm00001d021297	0.376618	0.00268403	Pantothenate kinase 2		Zm00001d027500	-1.37886	0.022946	Flower-specific gamma-thionin		Zm00001d039576	0.622694	0.000290224	F-box domain containing protein
Zm00001d027881	-1.19438	0.00268806	NA		Zm00001d003446	-0.98462	0.0229695	Gamma-glutamyltranspeptidase 1		Zm00001d052969	3.77712	0.000291398	Putative cytochrome P450 superfamily protein
Zm00001d053852	0.694506	0.00268806	Regulator of Vps4 activity in the MVB pathway protein		Zm00001d044078	2.56685	0.0229695	Little protein 1		Zm00001d007215	0.352555	0.000291398	26S proteasome regulatory subunit 4 homolog A
Zm00001d038531	-0.348059	0.00268806	Probable prolyl 4-hydroxylase 4		Zm00001d035682	-1.62092	0.0229695	Alpha-humulene/(-)-(E)-beta-caryophyllene synthase		Zm00001d044864	-1.33308	0.000291398	Protein EXORDIUM
Zm00001d046739	-0.706019	0.00268806	NA		Zm00001d046981	1.4954	0.0229695	Putative MYB DNA-binding domain superfamily protein		Zm00001d004495	-1.55816	0.000292279	WEB family protein
Zm00001d049785	-1.78079	0.00270345	Type II inositol polyphosphate 5-phosphatase 15		Zm00001d030532	-0.888679	0.0229923	Homeobox-leucine zipper protein ATHB-6		Zm00001d039731	0.470206	0.000292619	Transcription initiation factor TFIID subunit 4b
Zm00001d017603	-1.00017	0.00270345	Pentatricopeptide repeat (PPR) superfamily protein		Zm00001d038717	-0.718071	0.0230313	Seed specific protein Bn15D17A		Zm00001d003470	0.668218	0.000295222	Probable plastid-lipid-associated protein 2 chloroplastic
Zm00001d017079	-1.13614	0.0027053	BTB/POZ domain-containing protein		Zm00001d041327	1.55206	0.0230664	Probable LRR receptor-like serine/threonine-protein kinase		Zm00001d017702	-1.10627	0.000295222	Probable transcription factor KAN2
Zm00001d038915	2.48696	0.00271303	Putative WAK receptor-like protein kinase family protein		Zm00001d031732	-1.215	0.0230915	BAG family molecular chaperone regulator 1		Zm00001d027536	0.461267	0.000295412	Serine acetyltransferase 4
Zm00001d002080	-0.714982	0.00271451	E3 ubiquitin-protein ligase MBR2		Zm00001d026836	-3.32303	0.0231786	NA		Zm00001d049606	-0.881346	0.000295412	Pentatricopeptide repeat-containing protein chloroplastic
Zm00001d051125	-1.44485	0.00271486	LRR receptor-like serine/threonine-protein kinase EFR		Zm00001d039273	-0.584253	0.023203	SOUL heme-binding family protein		Zm00001d023384	1.45439	0.000295412	Phytosulfokines 2
Zm00001d003966	-2.30752	0.00272106	NA		Zm00001d007478	-1.04672	0.0233027	NA		Zm00001d049169	-2.65859	0.000297854	Putative FAD-binding Berberine family protein
Zm00001d041287	-1.02763	0.00272106	NA		Zm00001d047421	0.495468	0.0233027	Probable transcription factor		Zm00001d038484	2.49531	0.000298111	protein kinase-related
Zm00001d022493	-1.12307	0.00272106	alpha/beta-Hydrolases superfamily protein		Zm00001d002830	1.51226	0.0233301	Beta-fructofuranosidase 1		Zm00001d026457	-1.66708	0.000299065	DNA topoisomerase 2
Zm00001d010558	1.18211	0.00272106	Protein NETWORKED 2D		Zm00001d003081	-0.375484	0.0233364	glutaredoxin homolog1		Zm00001d018664	0.280305	0.000299713	Protein LEO1 homolog
Zm00001d042388	0.70917	0.00272503	DUF538 family protein		Zm00001d003084	0.385964	0.0233364	OSJNBa0043L24.15 protein; protein		Zm00001d017371	-0.542399	0.000300126	Signal transducer
Zm00001d001993	1.5427	0.00273828	Probable leucine-rich repeat receptor-like serine/threonine-protein kinase		Zm00001d014512	0.251781	0.0233364	USP39 protein		Zm00001d049640	1.10447	0.000300279	Lysine histidine transporter 2
Zm00001d021177	-1.71532	0.00274529	NA		Zm00001d018414	1.35624	0.0233364	IAA9-auxin-responsive Aux/IAA family member		Zm00001d009811	-0.919424	0.000304789	Protein NETWORKED 4A
Zm00001d002882	0.607642	0.00276517	SKP1-interacting partner 15		Zm00001d008194	1.71808	0.0233364	NA		Zm00001d018773	2.1628	0.000305863	Transcription factor JUNGBRUNNEN 1
Zm00001d009726	1.86548	0.00277091	alpha/beta-Hydrolases superfamily protein		Zm00001d010793	-1.50548	0.0233364	Probable pectinesterase 53		Zm00001d040997	-2.94977	0.000310124	Legumin-like protein
Zm00001d027486	1.36202	0.00277287	barley mlo defense gene homolog1		Zm00001d029387	-0.945179	0.0233871	LOL3		Zm00001d008903	-0.978724	0.000310728	Peptide-N4-(N-acetyl-beta-glucosaminyl)asparagine amidase A protein
Zm00001d027886	0.582292	0.00277428	compact plant2		Zm00001d002833	-1.44304	0.0233871	Pepsin A		Zm00001d042923	-0.307146	0.000310758	HVA22-like protein k
Zm00001d033174	0.619202	0.00277428	Golgi associated protein homolog		Zm00001d003650	-1.48063	0.0235033	NA		Zm00001d008635	1.57543	0.000310758	Probable carboxylesterase 15
Zm00001d035198	-0.335847	0.00277428	ATPase		Zm00001d032688	1.52518	0.023515	Carboxy-lyase		Zm00001d021360	0.853491	0.000312903	CDGSH iron-sulfur domain-containing protein NEET
Zm00001d037830	-0.856996	0.00277428	Putative pentatricopeptide repeat family protein		Zm00001d016104	-3.68028	0.023515	E3 ubiquitin-protein ligase ATL41		Zm00001d006124	0.328097	0.000315077	CONTAINS InterPro DOMAIN/s: Basic helix-loop-helix Nulp1-type (InterPro:IPR006994); Has 2929 Blast hits to 2464 proteins in 333 species: Archae - 2; Bacteria - 151; Metazoa - 913; Fungi - 372; Plants - 141; Viruses - 47; Other Eukaryotes - 1303 (so /.../NCBI BLink).
Zm00001d037918	1.10565	0.00277428	Non-cyanogenic beta-glucosidase		Zm00001d029087	1.55179	0.0235449	Sucrose synthase 3		Zm00001d053011	-1.20093	0.000316539	Putative DUF869 domain containing family protein
Zm00001d024470	1.16642	0.00277428	DNA-directed RNA polymerase		Zm00001d034968	-0.442744	0.0236484	Flap endonuclease GEN-like 2		Zm00001d025412	-0.70056	0.000316539	Nicotinate phosphoribosyltransferase-like protein
Zm00001d048789	-1.3498	0.00278576	NA		Zm00001d053772	1.00806	0.0236551	Serine/threonine-protein kinase HT1		Zm00001d017474	-1.65496	0.00031713	NA
Zm00001d051799	1.20046	0.00278576	Nudix hydrolase 17 mitochondrial		Zm00001d047269	0.891604	0.0236551	Protein EARLY FLOWERING 4		Zm00001d008940	-0.606461	0.000320036	ABC transporter D family member 2 chloroplastic
Zm00001d026310	-0.679415	0.00278576	Pentatricopeptide repeat-containing protein mitochondrial		Zm00001d027881	1.27299	0.0237078	NA		Zm00001d019934	-0.851902	0.000320865	O-Glycosyl hydrolases family 17 protein
Zm00001d045582	-1.4008	0.00279282	WAT1-related protein		Zm00001d051102	-5.34972	0.0237078	Leucine-rich repeat (LRR) family protein		Zm00001d013524	-0.579807	0.000321078	Polygalacturonate 4-alpha-galacturonosyltransferase
Zm00001d015656	0.257056	0.00281225	Esterase/lipase/thioesterase		Zm00001d040215	0.741184	0.0237078	Chaperone protein dnaJ 20 chloroplastic		Zm00001d039345	-2.62976	0.000321989	Indole-3-acetic acid-amido synthetase GH3.6
Zm00001d017326	-1.51334	0.00281379	UDP-glycosyltransferase 82A1		Zm00001d043779	0.410948	0.0237103	peptidyl-tRNA hydrolase1		Zm00001d039182	0.266403	0.000322867	uncharacterized protein
Zm00001d039826	1.27044	0.00281819	NA		Zm00001d006605	-1.33067	0.023724	Secretory carrier-associated membrane protein 3		Zm00001d052393	0.74293	0.000324956	Os01g0536600 protein
Zm00001d035658	-0.898559	0.00283157	Putative pentatricopeptide repeat-containing protein		Zm00001d047468	-0.840709	0.0237631	aberrant pollen transmission1		Zm00001d011638	0.744031	0.000325085	Lipid phosphate phosphatase 2
Zm00001d022582	0.388868	0.00283655	Protein ESKIMO 1		Zm00001d020434	1.15667	0.0238084	NAD(P)H-quinone oxidoreductase subunit L chloroplastic		Zm00001d039139	1.64259	0.000325425	Carbohydrate-binding X8 domain superfamily protein
Zm00001d027345	-0.541416	0.00287342	Mitochondrial import inner membrane translocase subunit TIM23-3		Zm00001d050307	0.671992	0.0238539	NA		Zm00001d016408	-1.65604	0.000328382	NA
Zm00001d033317	-0.530145	0.00287342	thylakoid assembly4		Zm00001d038867	-1.66867	0.0238539	NA		Zm00001d045383	-0.59085	0.000328382	deoxy xylulose synthase3
Zm00001d014200	-0.865551	0.00287342	Expressed protein; protein		Zm00001d053432	-1.43987	0.0238709	iron-sulfur protein2		Zm00001d013446	0.674528	0.000330314	NA
Zm00001d020138	1.83176	0.00287342	L-type lectin-domain containing receptor kinase IX.1		Zm00001d036546	-0.372755	0.0238709	Auxin-independent growth promoter-like protein: mRNA		Zm00001d011147	0.714191	0.000330708	Ascorbate transporter chloroplastic
Zm00001d016982	1.15752	0.00287427	Protein NRT1/ PTR FAMILY 6.4		Zm00001d053538	-1.56506	0.0239078	Cwf21		Zm00001d038108	-0.464327	0.000331049	S-adenosyl-L-methionine-dependent methyltransferases superfamily protein
Zm00001d013788	2.66816	0.0028746	Secretory carrier-associated membrane protein 3		Zm00001d040883	-0.547409	0.0239453	Probable protein phosphatase 2C 15		Zm00001d020325	-0.546157	0.000331225	Putative potassium transporter 12
Zm00001d014984	-0.840644	0.00287682	Glycerol-3-phosphate acyltransferase 8		Zm00001d021961	-0.789998	0.0239453	Alpha-L-fucosidase 3		Zm00001d044573	0.20647	0.000331545	Pre-mRNA-processing protein 40A
Zm00001d001656	-0.410742	0.00287758	NA		Zm00001d053068	1.3385	0.0239888	uncharacterized protein		Zm00001d040589	1.66405	0.000333552	Polygalacturonase
Zm00001d012040	-0.410422	0.00287898	Protein CPR-5		Zm00001d032473	-0.840752	0.0239972	CDPK-related kinase 3		Zm00001d044276	-1.59236	0.000333767	Leucine-rich repeat protein kinase family protein
Zm00001d041926	-0.638283	0.00288183	Transcription factor LHW		Zm00001d049449	0.79264	0.0239972	cold regulated protein homolog1		Zm00001d047077	2.38603	0.000334297	Beta-amylase 3 chloroplastic
Zm00001d008529	-0.769373	0.00288907	Endonuclease 2		Zm00001d035119	-0.933349	0.0239972	ACT domain-containing protein ACR8		Zm00001d047674	-0.915211	0.000337402	Cell-linked locus protein/ Long cell-linked locus protein
Zm00001d046628	-0.619587	0.00288907	NA		Zm00001d038548	1.13736	0.0239972	NA		Zm00001d046138	3.59995	0.000337608	NA
Zm00001d044121	0.504461	0.00289082	auxin-like 1 protein		Zm00001d047402	-1.04873	0.0239972	Putative calmodulin-binding family protein		Zm00001d030656	1.28907	0.000339587	rotten ear1
Zm00001d013262	0.436786	0.00290113	topoisomerase-like enzyme1		Zm00001d048345	-0.70374	0.0239972	Probable serine/threonine-protein kinase		Zm00001d031546	-1.5422	0.000339935	NA
Zm00001d053127	3.3415	0.00292156	Long chain acyl-CoA synthetase 2		Zm00001d017134	-1.55479	0.0240033	ZCN16		Zm00001d020067	-1.09492	0.000339935	NA
Zm00001d004364	3.27709	0.00292156	Senescence-specific cysteine protease SAG12		Zm00001d021571	-0.608539	0.0240619	UDP-glycosyltransferase 71B1		Zm00001d027383	-1.13812	0.000339937	Hydroxymethylglutaryl-CoA synthase
Zm00001d016506	0.470642	0.00292325	Probable UDP-N-acetylglucosamine--peptide N-acetylglucosaminyltransferase SEC		Zm00001d045564	-1.13815	0.024067	Haloacid dehalogenase-like hydrolase domain-containing protein Sgpp		Zm00001d052103	-1.00853	0.000339937	Pectin lyase-like superfamily protein
Zm00001d010796	-0.366857	0.00292507	hexokinase3		Zm00001d017287	1.59966	0.0241003	NA		Zm00001d017205	0.710438	0.000339937	Nucleotide/sugar transporter family protein
Zm00001d038403	-2.66611	0.00292958	NA		Zm00001d004921	1.97364	0.0241083	benzoxazinone synthesis14		Zm00001d011500	0.525044	0.000339937	Putative ubiquitin-conjugating enzyme family isoform 1/ Putative ubiquitin-conjugating enzyme family isoform 2/ Putative ubiquitin-conjugating enzyme family isoform 3/ Ubiquitin-conjugating enzyme E2-17 kDa 9
Zm00001d046184	-2.13482	0.00293431	Peroxidase 52		Zm00001d038262	-1.04729	0.0241386	Patellin-1		Zm00001d037829	-0.987871	0.000339937	Probable receptor-like protein kinase
Zm00001d003850	-0.737634	0.0029398	Probable BOI-related E3 ubiquitin-protein ligase 2		Zm00001d004416	-1.33159	0.0241552	Probable RNA-dependent RNA polymerase 5		Zm00001d025613	-3.05507	0.000339937	Casparian strip membrane protein 5
Zm00001d007962	-1.23148	0.0029398	Myb-like DNA-binding domain: SHAQKYF class family protein		Zm00001d012520	-1.10633	0.0241552	Protein LURP-one-related 8		Zm00001d000412	1.70846	0.000340658	hAT transposon superfamily protein
Zm00001d013818	-1.4585	0.00294749	Tryptophan N-monooxygenase 2		Zm00001d038302	-0.445299	0.0241609	Protein ROS1		Zm00001d046537	-1.96935	0.000340973	ABC transporter G family member 26
Zm00001d025963	0.347228	0.00295371	Sphingoid long-chain bases kinase 1		Zm00001d021648	-0.618191	0.0242529	NA		Zm00001d044308	2.59545	0.000341972	NA
Zm00001d022599	-0.690324	0.00295401	plastid transcriptionally active chromosome 2 homolog		Zm00001d012498	-2.30138	0.0243657	Transcription repressor OFP1		Zm00001d030529	-1.58764	0.000342347	NA
Zm00001d050575	0.424112	0.00295508	Serine/threonine-protein kinase PBS1		Zm00001d023384	1.37259	0.0243943	Phytosulfokines 2		Zm00001d038064	1.02787	0.000342347	cytochrome P450 family 94 subfamily D polypeptide 2
Zm00001d028566	0.412019	0.00296317	DUF3527 domain protein		Zm00001d036137	-0.828487	0.0244996	Palmitoyl-acyl carrier protein thioesterase chloroplastic		Zm00001d035434	-2.06358	0.000342534	Zinc finger (C3HC4-type RING finger) family protein
Zm00001d053697	0.363308	0.00296317	Methyl-CpG-binding domain-containing protein 9		Zm00001d017077	1.05418	0.0245437	red aleurone1		Zm00001d034062	-1.20916	0.000343807	PLASMODESMATA CALLOSE-BINDING PROTEIN 2
Zm00001d024872	-0.980698	0.00296317	THAUMATIN-LIKE PROTEIN 1		Zm00001d031811	1.31966	0.0245445	Patatin-like protein 2		Zm00001d038304	0.758759	0.000344299	Carbohydrate-binding-like fold
Zm00001d026017	2.03074	0.00296317	Protein REVEILLE 1		Zm00001d033317	0.565963	0.0245559	thylakoid assembly4		Zm00001d015260	0.233104	0.0003454	DNA-binding protein BIN4
Zm00001d046834	-1.85608	0.00297079	Low temperature and salt responsive protein		Zm00001d016615	-0.326569	0.0246354	Protein BONZAI 2		Zm00001d051916	-0.364292	0.000347191	NA
Zm00001d024169	-0.397692	0.00298153	Acyl-CoA N-acyltransferases (NAT) superfamily protein		Zm00001d024828	0.346071	0.0246774	MIF4G domain-containing protein / MA3 domain-containing protein		Zm00001d016913	-1.34374	0.000347191	NA
Zm00001d029185	2.3731	0.0029845	NA		Zm00001d026310	0.712922	0.0246774	Pentatricopeptide repeat-containing protein mitochondrial		Zm00001d029396	1.18623	0.000347796	Os10g0351100 protein
Zm00001d014074	-1.85399	0.00300052	CCT motif family protein		Zm00001d018200	1.50915	0.024781	SAUR12-auxin-responsive SAUR family member		Zm00001d030697	-0.690413	0.000348684	NA
Zm00001d010234	-0.575265	0.00300214	Probable receptor-like protein kinase		Zm00001d047806	-1.33071	0.024781	Putative E3 ubiquitin-protein ligase XBAT31		Zm00001d040034	1.202	0.000348684	Multicopper oxidase LPR2
Zm00001d002865	0.539579	0.00300533	Transducin/WD40 repeat-like superfamily protein		Zm00001d029462	-0.394336	0.0248343	inter-alpha-trypsin inhibitor heavy chain-related		Zm00001d021512	0.528975	0.00034883	small G protein family protein / RhoGAP family protein
Zm00001d008649	0.386505	0.00300689	RING/U-box superfamily protein		Zm00001d050899	0.891832	0.0252246	Cell number regulator 2		Zm00001d015468	1.32091	0.00035115	Zinc finger protein CONSTANS-LIKE 5
Zm00001d015519	0.831409	0.00301934	RNA-binding (RRM/RBD/RNP motifs) family protein		Zm00001d049479	0.336636	0.0252253	Regulator of Vps4 activity in the MVB pathway protein		Zm00001d013582	-0.997946	0.000352598	TRAM LAG1 and CLN8 (TLC) lipid-sensing domain containing protein
Zm00001d037218	1.69499	0.00301934	Glutaredoxin family protein		Zm00001d013108	-0.690571	0.0252253	NA		Zm00001d031773	1.23028	0.000352899	Protein HVA22
Zm00001d040764	3.05263	0.00303525	Cytochrome P450 709B2		Zm00001d008343	-1.62959	0.0252644	NA		Zm00001d045870	0.433338	0.000352899	Protein HOMOLOG OF MAMMALIAN LYST-INTERACTING PROTEIN 5
Zm00001d039051	-0.571232	0.00303645	Sugar transporter ERD6-like 6		Zm00001d013415	-1.11824	0.0253227	Receptor-like kinase TMK2		Zm00001d001068	-0.517896	0.000353304	NA
Zm00001d044325	3.21568	0.00306062	Auxin responsive protein		Zm00001d028998	-0.506985	0.0253444	hydroxyproline-rich glycoprotein family protein		Zm00001d039274	-0.482058	0.000355203	4-coumarate--CoA ligase-like 1
Zm00001d012597	-0.533127	0.00306135	NA		Zm00001d020872	0.687706	0.0253444	NA		Zm00001d027763	-1.00899	0.000355947	Plant-specific domain TIGR01615 family protein
Zm00001d053118	-2.06997	0.00306371	Thioredoxin reductase		Zm00001d048312	-1.6284	0.0253444	Homeobox-leucine zipper protein ATHB-23		Zm00001d026302	0.338783	0.000355947	OSJNBa0008M17.14 protein; protein
Zm00001d034313	-0.625827	0.00307476	Reticulon-like protein B8		Zm00001d053281	2.16791	0.0254114	nicotianamine aminotransferase1		Zm00001d005244	0.316939	0.000356111	G-box-binding factor 1
Zm00001d012126	0.411993	0.00307476	Ypt/Rab-GAP domain of gyp1p superfamily protein		Zm00001d053349	1.068	0.0254114	uncharacterized protein		Zm00001d014920	0.256032	0.000356111	Putative hect E3 ubiquitin ligase
Zm00001d013511	-1.20889	0.00308375	Protein DEFECTIVE IN MERISTEM SILENCING 3		Zm00001d002286	-1.73284	0.0254114	OSJNBa0058K23.8 protein; protein		Zm00001d005300	0.931014	0.000357653	Transcription factor MYB44
Zm00001d047397	-0.701642	0.00308375	transmembrane protein G1P-related 1		Zm00001d039935	-2.8313	0.0254114	heat shock protein17.2		Zm00001d015265	0.415566	0.00035799	Pathogenesis-related homeodomain protein
Zm00001d028180	0.868064	0.00309844	low phytic acid1		Zm00001d042618	0.704611	0.0254114	Floral homeotic protein PISTILLATA		Zm00001d030023	1.20544	0.000361304	NAC-transcription factor43
ENSRNA049466676	-1.30296	0.00310596	NA		Zm00001d013971	-0.393791	0.0254114	E3 ubiquitin-protein ligase RING1-like		Zm00001d002334	0.315781	0.000363299	AICARFT/IMPCHase bienzyme family protein
Zm00001d011563	0.860006	0.0031306	P-loop containing nucleoside triphosphate hydrolases superfamily protein		Zm00001d017995	-0.376187	0.0254114	Chaperone protein dnaJ 16		Zm00001d009409	-0.466386	0.000364246	Glycosyltransferase family protein 64 protein C5
Zm00001d023856	0.580527	0.00313235	RALF		Zm00001d019983	0.775895	0.0254114	bri1-like receptor kinase1		Zm00001d053565	0.28463	0.000365269	Serine/threonine protein phosphatase 2A 55 kDa regulatory subunit B beta isoform
Zm00001d045360	1.39086	0.00313952	NA		Zm00001d022102	-0.932591	0.0254114	Expressed protein; protein		Zm00001d026757	-1.87943	0.000366399	NA
Zm00001d002700	-1.14925	0.00314287	NA		Zm00001d038328	0.521536	0.0254114	alpha/beta-Hydrolases superfamily protein		Zm00001d042603	0.522335	0.000366399	NA
Zm00001d007904	0.272583	0.00315646	Ubiquitin carboxyl-terminal hydrolase 13		Zm00001d029091	1.43243	0.0254127	sucrose synthase2		Zm00001d030765	-0.958718	0.000367577	Nucleotide pyrophosphatase/phosphodiesterase
Zm00001d038178	1.37474	0.00315755	Probable carboxylesterase 17		Zm00001d016588	-0.689891	0.0254152	Glycerophosphodiester phosphodiesterase GDPD2		Zm00001d040466	0.87251	0.000367781	CO(2)-response secreted protease
Zm00001d047880	-0.357459	0.00315874	Putative metallophosphoesterase		Zm00001d022855	0.996899	0.0254382	NA		Zm00001d046342	1.49687	0.000367895	kaurene oxidase2
Zm00001d046939	0.70159	0.00316552	Protein kinase superfamily protein		Zm00001d014806	1.65099	0.0254382	UPF0496 protein		Zm00001d023420	1.59806	0.000368626	Protein TERMINAL FLOWER 1
Zm00001d032239	-0.462317	0.003184	high mobility group family A 102		Zm00001d011927	0.560023	0.0254382	Phospholipid/glycerol acyltransferase family protein		Zm00001d049455	0.394009	0.000370574	Putative SNF2-domain/RING finger domain/helicase domain protein
Zm00001d053151	-0.988083	0.003184	Putative POX domain/homeobox DNA-binding domain family protein		Zm00001d045479	0.511279	0.0255233	1-aminocyclopropane-1-carboxylate synthase3		Zm00001d049464	1.34224	0.000370574	B-box type zinc finger family protein
Zm00001d025129	2.38652	0.00318545	Short-chain dehydrogenase TIC 32 chloroplastic		Zm00001d031952	0.813979	0.0255242	NA		Zm00001d038392	-0.567427	0.000371207	Lung seven transmembrane receptor family protein
Zm00001d028355	-0.856767	0.00318907	Protein NRT1/ PTR FAMILY 8.3		Zm00001d050831	-1.75072	0.0255242	NA		Zm00001d027921	0.660554	0.00037302	Protein DETOXIFICATION 12
Zm00001d043710	2.27446	0.0031953	Germin-like protein subfamily T member 1		Zm00001d008488	0.640073	0.0255575	Cysteine-rich receptor-like protein kinase 37		Zm00001d043880	-1.1339	0.00037491	NA
Zm00001d014794	1.08479	0.00319715	physical impedance induced protein2		zma-MIR156b	1.68369	0.0256084	NA		Zm00001d031204	0.880261	0.000376989	alpha/beta-Hydrolases superfamily protein
Zm00001d021752	1.0144	0.00320194	Equilibrative nucleotide transporter 2		ENSRNA049997113	1.68369	0.0256084	NA		Zm00001d047151	-4.21061	0.000377491	NA
Zm00001d043954	0.371116	0.00320783	Mitogen-activated protein kinase 20		Zm00001d051589	-0.971694	0.0256348	Tetratricopeptide repeat (TPR)-like superfamily protein		Zm00001d001916	-1.78247	0.000382308	NA
Zm00001d032300	-0.635301	0.00321137	Major facilitator superfamily protein		Zm00001d007015	0.793703	0.0256348	EF hand family protein		Zm00001d028555	-1.5816	0.000382507	17.4 kDa class I heat shock protein 3
Zm00001d026224	-0.565788	0.00322522	NA		Zm00001d021737	0.50838	0.0256348	S-domain class receptor-like kinase3		Zm00001d010171	0.77819	0.000382507	Soluble inorganic pyrophosphatase 1
Zm00001d044516	0.504122	0.00322527	DCD (Development and Cell Death) domain protein		Zm00001d013719	-3.7018	0.0256589	cytochrome P450 family 87 subfamily A polypeptide 2		Zm00001d012515	0.740322	0.000382507	proline-rich family protein
Zm00001d014286	-0.550182	0.00323039	Calmodulin-binding transcription activator 2		Zm00001d034852	0.714108	0.0256678	F3H9.20 protein		Zm00001d027092	-2.69703	0.000382507	NA
Zm00001d018977	0.914126	0.00325258	DNA methyl transferase1		Zm00001d033454	-0.458141	0.0256719	SNARE-like superfamily protein		Zm00001d028952	-0.745881	0.00038804	Alpha-L-arabinofuranosidase 1
Zm00001d045097	0.82662	0.00327415	multidrug resistance-associated protein 11		Zm00001d017129	-0.420537	0.0256903	NA		Zm00001d013747	-0.552678	0.00038804	Presenilin
Zm00001d015445	-0.455445	0.00327675	Gamma-aminobutyrate transaminase POP2 mitochondrial		Zm00001d038552	0.824968	0.0256939	NA		Zm00001d011401	-0.981808	0.00038804	Protein SGT1 homolog A
Zm00001d035869	-0.474264	0.00328261	Protein MEI2-like 5		Zm00001d047842	-0.807611	0.0258011	Putative leucine-rich repeat receptor-like protein kinase family protein		Zm00001d012663	2.17439	0.000388794	Putative MATE efflux family protein
Zm00001d053966	-0.415364	0.0032837	NA		Zm00001d019698	0.735584	0.0258438	Cyclase family protein		Zm00001d018093	1.5305	0.000390442	NA
Zm00001d050317	-1.11813	0.00330356	Oxidoreductase		Zm00001d044395	0.540454	0.025856	Phosphoethanolamine/phosphocholine phosphatase		Zm00001d014344	0.508823	0.000393698	P-loop containing nucleoside triphosphate hydrolases superfamily protein
Zm00001d043006	-1.17907	0.00330399	Glutaredoxin family protein		Zm00001d033749	-0.477868	0.0258665	defective kernel35		Zm00001d025327	-0.758063	0.000393698	UPF0496 protein
Zm00001d003538	0.744502	0.00330572	NA		Zm00001d002754	1.4589	0.0258665	Homeobox-leucine zipper protein ATHB-4		Zm00001d015747	0.560214	0.000395272	Protein disulfide-isomerase like 2-1
Zm00001d052292	0.623814	0.00332757	Probable galacturonosyltransferase-like 9		Zm00001d018977	-0.9855	0.0258665	DNA methyl transferase1		Zm00001d031581	0.785366	0.000396757	Probable pre-mRNA-splicing factor ATP-dependent RNA helicase DEAH5
Zm00001d046496	-1.23534	0.00332757	NA		Zm00001d003482	-2.37292	0.0258739	NA		Zm00001d018409	0.244188	0.000398192	26S protease regulatory subunit 6A homolog A
Zm00001d029462	0.36238	0.00335144	inter-alpha-trypsin inhibitor heavy chain-related		Zm00001d037271	-1.26947	0.025897	ARM repeat superfamily protein		Zm00001d037056	0.312845	0.000399067	Phosphatidylinositol 4-kinase gamma 3
Zm00001d050606	0.453371	0.0033536	TUDOR-SN protein 1		Zm00001d017613	0.727004	0.0259187	Protein LYK2		Zm00001d029349	1.59037	0.000403899	NA
Zm00001d005378	-2.83125	0.00338576	Lecithin-cholesterol acyltransferase-like 1		Zm00001d005996	2.31957	0.0259612	Photosystem I reaction center subunit V		Zm00001d002833	-1.55213	0.000404757	Pepsin A
Zm00001d031487	0.440469	0.00339022	SBP-transcription factor16		Zm00001d013504	-0.505443	0.0260102	Late embryogenesis abundant (LEA) hydroxyproline-rich glycoprotein family		Zm00001d023950	-1.01351	0.000407541	Glucuronoxylan 4-O-methyltransferase 2
Zm00001d032293	0.275266	0.00339022	Transducin/WD40 repeat-like superfamily protein		Zm00001d018969	1.19934	0.0260464	tryptophan synthase alpha subunit1		Zm00001d025690	0.426803	0.000407763	Isocitrate dehydrogenase
Zm00001d003009	-1.37548	0.00339022	senescence regulator		Zm00001d030103	0.931618	0.0261702	Probable xyloglucan endotransglucosylase/hydrolase protein 30		Zm00001d052172	1.70272	0.000411654	EF hand family protein
Zm00001d040712	0.246383	0.00339022	Protein GFS12		Zm00001d018119	-1.50356	0.0261702	Transcription factor bHLH99		Zm00001d020538	0.57232	0.000411654	Tsi1-interacting protein TSIP1
Zm00001d042213	0.472187	0.00339022	thiamine diphosphate carrier protein2		Zm00001d013825	0.833646	0.026235	NA		Zm00001d044271	0.350374	0.000412677	Protein ROOT HAIR DEFECTIVE 3
Zm00001d043935	0.809883	0.00339022	Ras-related protein RABA1f		Zm00001d044925	1.42891	0.0263453	CP12-1		Zm00001d039717	-0.534226	0.000414828	Nucleotide/sugar transporter family protein
Zm00001d050082	1.31641	0.00339102	Pectinesterase		Zm00001d003469	1.08362	0.0263818	Sugar transport protein 5		Zm00001d018436	-1.78746	0.000415643	NA
Zm00001d000522	-0.507904	0.00339825	NA		Zm00001d009110	-2.52183	0.0263818	Pectinesterase inhibitor		Zm00001d049452	0.609789	0.000417229	kinesin-like protein
Zm00001d052018	-1.01933	0.00340631	Probable protein phosphatase 2C 22		Zm00001d014958	1.22488	0.0263874	cytochrome P450 family 87 subfamily A polypeptide 6		Zm00001d021031	-0.270579	0.000417229	cyclin12
Zm00001d041743	-1.13306	0.00341305	NA		Zm00001d041574	1.691	0.02639	Probable LRR receptor-like serine/threonine-protein kinase		Zm00001d035888	2.13557	0.00042171	extensin-like protein
Zm00001d012963	-0.864913	0.00341305	Dof zinc finger protein DOF3.6		Zm00001d002550	1.80858	0.026447	Pentatricopeptide repeat-containing protein chloroplastic		Zm00001d018275	0.344684	0.000425327	NA
Zm00001d032285	0.699333	0.00342433	NA		Zm00001d004687	2.50276	0.026447	O-methyltransferase ZRP4		Zm00001d034777	0.543962	0.00042564	Nicotinate phosphoribosyltransferase 2
Zm00001d008527	-0.827198	0.00343128	NA		Zm00001d038511	1.15988	0.026447	gibberellin 1617-oxidase1		Zm00001d026576	-1.37635	0.00042564	Leucine-rich repeat (LRR) family protein
Zm00001d028960	0.688607	0.00344033	Expressed protein; protein		Zm00001d029135	2.11805	0.026465	sugars will eventually be exported transporter12a		Zm00001d018681	1.68768	0.000426109	NA
Zm00001d033297	0.559166	0.00344256	Protein DA1-related 1		Zm00001d049588	-0.915573	0.026465	Putative leucine-rich repeat receptor-like protein kinase family protein		Zm00001d005822	-0.867705	0.000426626	cytochrome P450 12
Zm00001d006238	0.439473	0.00345057	Calcium lipid binding protein-like		Zm00001d050793	0.30837	0.026465	Nucleic acid binding protein		Zm00001d008237	-0.73207	0.000426626	RING/U-box superfamily protein
Zm00001d030471	0.373182	0.00346036	Alpha-L-fucosidase 2		Zm00001d027051	3.59475	0.026465	NA		Zm00001d040548	2.36929	0.000427613	NA
Zm00001d021303	0.637572	0.00346458	Probable receptor-like protein kinase		Zm00001d012178	-0.617012	0.0265109	Rhodanese-like domain-containing protein 4A chloroplastic		Zm00001d053003	0.196762	0.000428178	ARM repeat superfamily protein
Zm00001d043703	0.87896	0.00347212	Anoctamin-like protein		Zm00001d050985	0.451147	0.026601	Regulator of chromosome condensation (RCC1) family protein		Zm00001d006384	0.387713	0.000428178	lipid transporters
Zm00001d027536	0.397801	0.00348359	Serine acetyltransferase 4		Zm00001d043705	-0.71803	0.0266321	RNA polymerase II transcriptional coactivator KELP		Zm00001d038570	0.329985	0.000429616	global transcription factor group B1
Zm00001d005456	0.946312	0.00348359	UDP-glycosyltransferase 76C1		Zm00001d049008	-1.72579	0.0266805	Apyrase 1		Zm00001d026404	2.28133	0.000429616	NA
Zm00001d019123	0.434348	0.00348359	Survival protein SurE-like phosphatase/nucleotidase		Zm00001d052662	0.982095	0.0266805	C2 domain protein		Zm00001d048671	-1.25162	0.000434041	Calmodulin binding protein
Zm00001d025795	1.13582	0.00348359	Trafficking protein particle complex II-specific subunit 120 homolog		Zm00001d014089	-0.891582	0.0266805	Adenine nucleotide alpha hydrolases-like superfamily protein		Zm00001d000745	1.1443	0.000435358	NA
Zm00001d000237	1.05878	0.00348359	cis-zeatin O-glucosyltransferase1		Zm00001d021572	-0.595612	0.0266805	UDP-glycosyltransferase 71B1		Zm00001d002772	-1.982	0.000435924	Blue copper protein
Zm00001d008226	-1.09528	0.00349511	Sialin		Zm00001d032333	-0.626562	0.0266961	Phosphoglucan phosphatase LSF1 chloroplastic		Zm00001d021345	1.07399	0.000435924	Protein argonaute 1
Zm00001d048486	0.460814	0.00349511	DGCR14 protein		Zm00001d018626	0.495814	0.0267196	Outer arm dynein light chain 1 protein		Zm00001d018926	-1.35931	0.000437222	Bifunctional inhibitor/lipid-transfer protein/seed storage 2S albumin superfamily protein
Zm00001d020664	-0.271686	0.00350002	Gamma-tubulin complex component 3		Zm00001d011443	-1.52987	0.0267407	Putative AMP-dependent synthetase and ligase superfamily protein		Zm00001d028243	-1.41269	0.000438016	Glucan endo-13-beta-glucosidase 3
Zm00001d024572	-0.724569	0.00350596	Putative glycerol-3-phosphate transporter 1		Zm00001d048073	-2.96735	0.0267407	Heat shock 70 kDa protein 8		Zm00001d003050	-0.715445	0.000438016	Putative pentatricopeptide repeat-containing protein
Zm00001d003859	2.72703	0.00351751	Potassium transporter 5		Zm00001d028280	0.738977	0.0268356	Wall-associated receptor kinase-like 14		Zm00001d029673	0.348488	0.000439362	F-box protein PP2-A13
Zm00001d002323	-0.566436	0.00353104	Trypsin family protein		Zm00001d053741	0.428097	0.0268395	Putative autophagy domain family protein		Zm00001d027894	-0.774877	0.000441644	DUF1677 family protein
Zm00001d033633	0.472502	0.00353156	Haloacid dehalogenase-like hydrolase (HAD) superfamily protein		Zm00001d040509	-1.0223	0.0268395	beta tubulin5		Zm00001d005821	-1.33359	0.000441892	Flavonoid 3-monooxygenase
Zm00001d020782	3.05085	0.00353813	Auxin responsive protein		Zm00001d011838	1.87315	0.0269449	Glycosyltransferase family 61 protein		Zm00001d021177	-1.92436	0.000441892	NA
Zm00001d028414	-0.516651	0.00354672	ATP-dependent Clp protease ATP-binding subunit CLPT1 chloroplastic		Zm00001d047190	-1.24945	0.027077	3-ketoacyl-CoA synthase 12		Zm00001d023841	-1.33278	0.00044274	P-loop nucleoside triphosphate hydrolases superfamily protein with CH (Calponin Homology) domain
Zm00001d030532	-0.795592	0.00354672	Homeobox-leucine zipper protein ATHB-6		Zm00001d022860	-1.02396	0.0270844	NA		Zm00001d014188	0.431247	0.000444034	Phospholipid-transporting ATPase 3
Zm00001d013097	0.591531	0.00354672	O-Glycosyl hydrolases family 17 protein		Zm00001d034037	-0.870005	0.0270844	Circumsporozoite protein		Zm00001d032547	-0.604612	0.000444218	Expressed protein; protein
Zm00001d017199	-1.25288	0.00354672	Temperature-induced lipocalin-1		Zm00001d037626	-0.407428	0.0270844	Serine/threonine protein phosphatase 2A 57 kDa regulatory subunit B' iota isoform		Zm00001d023498	-0.669543	0.000445015	Retrovirus-related Pol polyprotein LINE-1
Zm00001d011924	1.40219	0.00354672	Protein LURP-one-related 2		Zm00001d000412	1.71567	0.027089	hAT transposon superfamily protein		Zm00001d036690	-1.15287	0.000445891	OSJNBa0041A02.21 protein; protein
Zm00001d039283	-0.635908	0.00355257	Plasma membrane-associated cation-binding protein 1		Zm00001d054107	-0.248868	0.0271357	FAM10 family protein		Zm00001d006177	-0.806264	0.000446409	Protein HAPLESS 2
Zm00001d013122	0.325651	0.00355257	Ycf20-like protein		Zm00001d021168	2.53261	0.027229	UDP-glycosyltransferase 74B1		Zm00001d037215	0.579943	0.000449087	electron carriers;protein disulfide oxidoreductases
Zm00001d019304	-0.553038	0.00355257	NA		Zm00001d032368	1.18073	0.0272429	Protein SAR DEFICIENT 1		Zm00001d032692	0.547904	0.000449455	MATH domain containing protein; Os10g0478500 protein
Zm00001d018421	0.657397	0.00355979	GATA transcription factor 8		Zm00001d042801	0.991075	0.0272429	GABA transporter 1		Zm00001d014337	0.336994	0.000449463	Transcription initiation factor IIF: alpha subunit
Zm00001d038020	-0.78099	0.00355979	Putative leucine-rich repeat transmembrane protein kinase family protein		Zm00001d029835	1.50919	0.0272641	plant/K24M7-17 protein		Zm00001d023387	-2.13148	0.000452751	AT3g10020/T22K18_16; Expressed protein; protein
Zm00001d041700	1.38847	0.00356228	Bifunctional 3-dehydroquinate dehydratase/shikimate dehydrogenase chloroplastic		Zm00001d053127	-3.8726	0.0272641	Long chain acyl-CoA synthetase 2		Zm00001d022625	-1.03516	0.000453056	Synaptotagmin-2
Zm00001d008306	0.356949	0.00356228	RING/U-box superfamily protein		Zm00001d052435	2.68273	0.0273409	Probable peptide/nitrate transporter		Zm00001d023239	0.36725	0.000453214	suppressors of mec-8 and unc-52 (C.elegans)
Zm00001d040804	-0.441324	0.0035683	Protein LOW PSII ACCUMULATION 1 chloroplastic		Zm00001d009605	-2.50206	0.0273409	Sugar transporter ERD6-like 6		Zm00001d020943	-0.37724	0.000454024	O-fucosyltransferase family protein
Zm00001d013625	-0.773122	0.00359667	LOB domain-containing protein 4		Zm00001d020040	0.454731	0.0273452	Lipid phosphate phosphatase 2		Zm00001d016081	-0.84118	0.000454579	Extra-large G-protein-like; protein
Zm00001d038558	0.633972	0.00359667	cystatin3		Zm00001d020185	1.19168	0.027393	Probable LRR receptor-like serine/threonine-protein kinase		Zm00001d013071	-1.35222	0.000455613	Auxin-responsive protein IAA4
Zm00001d000126	1.08073	0.00359667	OSJNBb0118P14.9 protein; Os04g0403901 protein		Zm00001d035090	-0.740117	0.0274742	Beta-16-galactosyltransferase GALT31A		Zm00001d018831	-0.547451	0.000456206	NA
Zm00001d015665	0.881198	0.00360692	Serine/threonine protein phosphatase 2A regulatory subunit B''alpha		Zm00001d052796	0.33397	0.0274796	14-3-3-like protein A		Zm00001d012765	0.500246	0.000459371	Peptidase M28 family protein
Zm00001d036797	1.22206	0.00360692	Non-structural maintenance of chromosomes element 4 homolog A		Zm00001d013446	0.636353	0.0274834	NA		Zm00001d048220	1.85545	0.000461161	Outer arm dynein light chain 1 protein
Zm00001d051565	0.959715	0.00363707	Replication factor C subunit 3		Zm00001d013492	-1.1097	0.0274834	Ethylene-insensitive protein 2		Zm00001d048890	0.927341	0.000464386	Acyl-coenzyme A oxidase
Zm00001d044836	-1.28456	0.00364077	Transcription factor TCP14		Zm00001d017793	-0.405632	0.0274834	Kinesin light chain		Zm00001d005420	4.20322	0.000464386	Probable protein phosphatase 2C 33
Zm00001d035029	0.654968	0.0036528	Protein transporter/ Putative VHS/GAT domain containing family protein isoform 1/ Putative VHS/GAT domain containing family protein isoform 2		Zm00001d008477	0.665446	0.0274834	receptor-like kinase4		Zm00001d047920	-0.251809	0.000464386	ATP-dependent Clp protease ATP-binding subunit CLPT1 chloroplastic
Zm00001d022474	1.10781	0.00366823	Copper chaperone		Zm00001d011061	-0.321314	0.0275139	Pectin acetylesterase 5		Zm00001d031261	-2.08117	0.000464556	E3 ubiquitin-protein ligase ATL6
Zm00001d034866	-0.433174	0.003681	Pantoate--beta-alanine ligase		Zm00001d015129	-1.442	0.027689	Pectin lyase-like superfamily protein		Zm00001d036812	-1.26294	0.000466934	Zinc finger protein WIP2
Zm00001d046313	0.3419	0.003681	Ras-related protein RABA1d		Zm00001d023468	-0.773886	0.027689	NDR1/HIN1-like 1		Zm00001d047860	-0.743323	0.000466934	Putative AP2/EREBP transcription factor superfamily protein
Zm00001d011763	0.842607	0.00369399	RING/FYVE/PHD zinc finger superfamily protein		Zm00001d014200	0.906272	0.0277442	Expressed protein; protein		Zm00001d020510	-0.700957	0.000467888	Cytochrome c oxidase copper chaperone
Zm00001d042074	0.240424	0.00370505	Regulator of chromosome condensation (RCC1) family with FYVE zinc finger domain		Zm00001d016933	1.30019	0.0278473	loricrin-related		Zm00001d008759	0.383922	0.00046841	NA
Zm00001d009365	-1.0323	0.00370505	sugars will eventually be exported transporter2		Zm00001d019407	-3.01164	0.0278473	Acidic endochitinase		Zm00001d038514	1.08471	0.000468857	Protein LURP-one-related 8
Zm00001d024268	-1.10594	0.00370821	NAC domain-containing protein 21/22		Zm00001d037778	0.492168	0.0278473	Acyl-CoA N-acyltransferases (NAT) superfamily protein		Zm00001d038352	-2.32105	0.000471051	NA
Zm00001d047396	-0.390055	0.00370863	Dual specificity phosphatase Cdc25		Zm00001d004525	1.04058	0.0278511	Protein REDUCED WALL ACETYLATION 3		Zm00001d048802	0.677702	0.000472271	Glycine-rich domain-containing protein 1
Zm00001d042862	-1.44918	0.00372208	Lipid binding protein		Zm00001d044182	-3.883	0.0278511	Protein TOO MANY MOUTHS		Zm00001d011620	-0.778709	0.000472271	DUF1639 family protein
Zm00001d041818	-1.26054	0.00373037	Myb-like DNA-binding domain containing protein		Zm00001d014135	0.939452	0.0278511	NA		Zm00001d000205	-0.33101	0.000473109	Carboxypeptidase SOL1
Zm00001d010052	-1.26427	0.00373037	NA		Zm00001d049762	0.794089	0.0278611	NA		Zm00001d027055	0.506738	0.000475039	NA
Zm00001d011780	-0.555733	0.00373037	Radical SAM superfamily protein		Zm00001d013159	-0.536684	0.027902	alpha tubulin3		Zm00001d005159	0.667237	0.000475251	Spermidine synthase 2
Zm00001d029461	-1.2304	0.00374168	Protein LAZ1 homolog 2		Zm00001d026028	-0.832269	0.027902	OSJNBa0013K16.16 protein; protein		Zm00001d021214	-1.83168	0.000475251	Ethylene-responsive transcription factor RAP2-11
Zm00001d039472	0.554647	0.00374168	NA		Zm00001d052890	-2.24808	0.0279712	Squamosa promoter-binding-like protein 15		Zm00001d001788	-0.422589	0.000475942	K(+) efflux antiporter 2 chloroplastic
Zm00001d045327	0.534097	0.00374466	Pyridoxal-5'-phosphate-dependent enzyme family protein		Zm00001d005489	0.283055	0.0279712	D-isomer specific 2-hydroxyacid dehydrogenase family protein		Zm00001d005814	1.88832	0.000477217	Photosystem I chlorophyll a/b-binding protein 6 chloroplastic
Zm00001d014903	0.438366	0.00375151	Phospholipase C		Zm00001d040541	0.597125	0.0279922	Auxin-responsive protein IAA20		Zm00001d043312	0.240141	0.000479673	Ubiquitin carboxyl-terminal hydrolase 13
Zm00001d002678	-0.772508	0.00375178	Prolyl oligopeptidase family protein		Zm00001d033892	-0.914576	0.0281313	Core-2/I-branching beta-16-N-acetylglucosaminyltransferase family protein		Zm00001d051005	-1.18954	0.000479768	Remorin family protein
Zm00001d046363	1.05189	0.00375319	S-adenosyl-L-methionine-dependent methyltransferases superfamily protein		Zm00001d022027	0.430984	0.0281313	NA		Zm00001d000270	0.84008	0.000481337	DNA-directed RNA polymerase subunit beta
Zm00001d004894	1.91003	0.00375956	ribulose bisphosphate carboxylase small subunit2		Zm00001d012198	-0.839033	0.0281313	Protein root UVB sensitive 6		Zm00001d033334	0.778107	0.000482412	Calcium-transporting ATPase 2 plasma membrane-type
Zm00001d034940	-1.26077	0.00378413	ABC transporter G family member 34		Zm00001d024208	2.41186	0.0281313	Alpha-humulene/(-)-(E)-beta-caryophyllene synthase		Zm00001d014145	-1.26382	0.000482412	NA
Zm00001d041831	0.886609	0.00379166	DNA binding protein		Zm00001d048658	5.76102	0.0281605	Putative laccase family protein		Zm00001d052680	-0.406983	0.000484266	Putative acyl-CoA N-acyltransferases (NAT) family protein
Zm00001d021804	1.14216	0.00379881	Internal alternative NAD(P)H-ubiquinone oxidoreductase A1 mitochondrial		Zm00001d033471	1.50662	0.0282215	Putative DNA-binding protein		Zm00001d001959	-0.625807	0.000484511	GTP cyclohydrolase I 1
Zm00001d038404	0.42323	0.003803	Ypt/Rab-GAP domain of gyp1p superfamily protein		Zm00001d051810	1.58064	0.0282489	NA		Zm00001d032091	1.36684	0.000485088	SAUR33-auxin-responsive SAUR family member
Zm00001d047560	-1.01217	0.00381672	Protein binding protein/ Putative RING zinc finger domain superfamily protein isoform 1/ Putative RING zinc finger domain superfamily protein isoform 2		Zm00001d036077	0.371264	0.0283188	NA		Zm00001d007450	-0.338529	0.000486062	NA
Zm00001d014097	0.535942	0.0038197	Ras-related protein RABC2a		Zm00001d019568	-0.257226	0.0283304	phosphoglucosamine mutase family protein		Zm00001d007363	2.25527	0.000486826	BRASSINOSTEROID INSENSITIVE 1-associated receptor kinase 1
Zm00001d002687	-1.62763	0.00383305	Cytochrome P450 86A7		Zm00001d051502	-0.570272	0.028457	calcium dependent protein kinase7		Zm00001d027803	-0.739763	0.000490077	Beta-galactosidase
Zm00001d017067	0.394248	0.00383305	ARM-repeat/Tetratricopeptide repeat (TPR)-like protein		Zm00001d047840	-0.748987	0.028471	NA		Zm00001d050747	-0.858817	0.000490213	T-complex protein 11
Zm00001d020610	-1.92349	0.00383305	NA		Zm00001d034886	0.474927	0.0285083	Heat stress transcription factor A-1a		Zm00001d038104	-0.542499	0.000492032	Mannosylglycoprotein endo-beta-mannosidase
Zm00001d024198	-2.11177	0.00383305	GDU1		Zm00001d051323	0.964747	0.0285384	Probable receptor-like protein kinase		Zm00001d027892	0.849588	0.000492939	root-specific kinase 1
Zm00001d008906	0.408167	0.00385864	Protein SCAR3		Zm00001d051509	-2.2143	0.0285384	Putative HLH DNA-binding domain superfamily protein		Zm00001d016803	0.237274	0.000492959	RNA polymerase II transcriptional coactivator KIWI
Zm00001d047461	0.932785	0.00385919	Mitochondria fission 1 protein		Zm00001d026599	-2.52764	0.0285384	light harvesting chlorophyll a/b binding protein6		Zm00001d043071	-1.21885	0.00049617	Probable inactive receptor kinase
Zm00001d044578	-0.385706	0.00386288	CONTAINS InterPro DOMAIN/s: RNAse P Rpr2/Rpp21 subunit (InterPro:IPR007175); Has 35333 Blast hits to 34131 proteins in 2444 species: Archae - 798; Bacteria - 22429; Metazoa - 974; Fungi - 991; Plants - 531; Viruses - 0; Other Eukaryotes - 9610 (sou /.../CBI BLink).		Zm00001d019595	0.211722	0.0285587	Regulator of chromosome condensation (RCC1) family protein		Zm00001d045509	0.357876	0.00049617	Nuclear speckle RNA-binding protein A
Zm00001d014011	0.704899	0.00386292	Double-stranded RNA-binding protein 2		Zm00001d017644	-0.722416	0.0286964	RNA polymerase I specific transcription initiation factor RRN3 protein		Zm00001d027196	-0.582705	0.00049617	NA
Zm00001d002307	-0.827278	0.00387115	NA		Zm00001d038864	0.551575	0.0287349	DUF1639 family protein		Zm00001d007753	1.86797	0.000498347	Eukaryotic aspartyl protease family protein
Zm00001d053283	-0.336088	0.00389185	Putative ribosomal protein S4 (RPS4A) family protein isoform 1/ Putative ribosomal protein S4 (RPS4A) family protein isoform 2/ Putative ribosomal protein S4 (RPS4A) family protein isoform 3		Zm00001d029839	-1.07014	0.0287937	Protein NEN2		Zm00001d042047	1.69828	0.000505946	5-epiaristolochene 13-dihydroxylase
Zm00001d044426	-2.30789	0.00389185	DnaJ-like protein		Zm00001d006739	-1.66074	0.0287937	Seed specific protein Bn15D17A		Zm00001d027570	0.500191	0.000506595	Probable protein phosphatase 2C 48
Zm00001d040466	0.755686	0.00391139	CO(2)-response secreted protease		Zm00001d040678	0.560401	0.0287937	NA		Zm00001d041620	-0.306795	0.000508103	CTP synthase family protein
Zm00001d018705	-0.932802	0.00393179	NA		Zm00001d046923	-2.19241	0.0287937	D-3-phosphoglycerate dehydrogenase 2 chloroplastic		Zm00001d043206	-0.571496	0.000508656	Putative E3 ubiquitin-protein ligase RING1a
Zm00001d025991	0.805035	0.0039356	ELMO/CED-12 family protein		Zm00001d019130	0.523663	0.0288139	Metallopeptidase M24 family protein		Zm00001d033222	1.04853	0.000510401	viviparous14
Zm00001d019329	-0.62058	0.00393857	Nuclear localized protein 1		Zm00001d003750	-0.95426	0.0288232	Digalactosyldiacylglycerol synthase 1 chloroplastic		Zm00001d048092	-0.456949	0.000511185	Retrovirus-related Pol polyprotein LINE-1
Zm00001d005473	0.324828	0.00394383	mRNA-decapping enzyme-like protein		Zm00001d042123	-1.18682	0.0288366	Cytosolic sulfotransferase 17		Zm00001d041792	-1.2493	0.000513503	NA
Zm00001d027854	-1.1642	0.00394407	sucrose transporter1		Zm00001d025570	0.206269	0.0288499	Ubiquitin carboxyl-terminal hydrolase 3		Zm00001d013825	0.858807	0.000517102	NA
Zm00001d045788	-0.82123	0.00394407	UDP-glycosyltransferase 72B1		Zm00001d028561	-3.2482	0.0288513	17.4 kDa class I heat shock protein		Zm00001d037298	1.40223	0.000517382	UDP-glycosyltransferase 84A1
Zm00001d009967	-0.81061	0.00394743	UDP-sulfoquinovose synthase chloroplastic		Zm00001d032132	-1.6737	0.0288513	NA		Zm00001d033744	-0.512117	0.000518155	ubiquitin conjugating enzyme5
Zm00001d031749	0.788872	0.00394989	Pyridoxal phosphate (PLP)-dependent transferases superfamily protein		Zm00001d018193	-1.09888	0.0288513	NA		Zm00001d035846	-5.37359	0.000519063	Histidine kinase CKI1
Zm00001d017147	2.05948	0.00394989	NA		Zm00001d024634	-1.89679	0.0288572	Probable aquaporin NIP5-1		Zm00001d027938	-0.803107	0.000519137	UDP-glucuronate:xylan alpha-glucuronosyltransferase 2
Zm00001d005767	-0.651282	0.00395828	DNA glycosylase superfamily protein		Zm00001d031782	0.597382	0.0288661	Pentatricopeptide repeat-containing protein		Zm00001d027233	1.91041	0.000521199	ATP-dependent DNA helicase
Zm00001d028412	0.789067	0.00396559	Filament-like plant protein 4		Zm00001d029577	-1.00986	0.028933	NA		Zm00001d049159	-0.926054	0.000521199	Putative leucine-rich repeat receptor-like protein kinase family protein
Zm00001d034252	-0.324283	0.00396559	dolichol-phosphate mannosyltransferase-related		Zm00001d034917	-1.45765	0.028933	GDSL esterase/lipase EXL3		Zm00001d032279	0.528964	0.000524545	ABC2 homolog 15
Zm00001d041960	-3.55371	0.00396559	Transcription factor LUX		Zm00001d027517	0.502434	0.0289449	Thiol-disulfide oxidoreductase LTO1		Zm00001d011797	2.36015	0.000527063	Protein COFACTOR ASSEMBLY OF COMPLEX C SUBUNIT B CCB3 chloroplastic
Zm00001d042555	0.421558	0.00396559	Zinc-binding dehydrogenase family protein		Zm00001d042921	0.357416	0.0289449	SLT1 protein		Zm00001d053894	0.441204	0.00052751	ILITYHIA
Zm00001d020042	0.475474	0.00396559	NA		Zm00001d013486	0.420298	0.0289449	ethylene receptor1-14		Zm00001d018685	1.89408	0.000529568	NA
Zm00001d039005	0.288003	0.00396559	Guanylate-binding family protein		Zm00001d016957	0.802492	0.0289449	Agamous-like MADS-box protein AGL16		Zm00001d048401	2.83266	0.000529568	RTCS-like1
Zm00001d025894	-0.480328	0.00396559	Probable sphingolipid transporter spinster homolog 2		Zm00001d021345	1.07631	0.0289449	Protein argonaute 1		Zm00001d021127	0.457269	0.000535321	ATP-dependent RNA helicase DRS1
Zm00001d048732	-0.348228	0.00396837	Sodium/hydrogen exchanger		Zm00001d026029	-1.26004	0.0290916	OSJNBa0013K16.16 protein; protein		Zm00001d040686	0.502539	0.000536795	Protein translocase subunit SECA1 chloroplastic
Zm00001d003109	-0.256072	0.00396837	Dol-P-Glc:Glc(2)Man(9)GlcNAc(2)-PP-Dol alpha-12-glucosyltransferase		Zm00001d052182	0.622781	0.0292074	NA		Zm00001d052733	-1.12566	0.000537265	BAG family molecular chaperone regulator 1
Zm00001d053838	0.432579	0.00398212	ubiquitin2		Zm00001d038005	-1.07764	0.0292074	Putative patellin family protein		Zm00001d023908	-0.385764	0.000539393	Auxin-binding protein 5
Zm00001d035479	-0.903687	0.00399049	Putative WAK family receptor-like protein kinase		Zm00001d034239	-1.5159	0.0292941	Kinesin-like protein KIN-8B		Zm00001d029091	1.46581	0.000547437	sucrose synthase2
Zm00001d013218	-0.396902	0.00399648	Chaperone DnaJ-domain superfamily protein		Zm00001d036079	0.501399	0.0293127	NA		Zm00001d037308	-0.491483	0.000547586	NA
Zm00001d021459	-3.83443	0.00400897	Auxin-responsive protein SAUR61		Zm00001d009619	1.19636	0.0293535	Putative WRKY DNA-binding domain superfamily protein		Zm00001d046915	-0.742666	0.000550105	Putative AMP-dependent synthetase and ligase superfamily protein
Zm00001d035057	-1.02586	0.00401409	HXXXD-type acyl-transferase family protein		Zm00001d037829	-0.914596	0.0293535	Probable receptor-like protein kinase		Zm00001d011467	-2.39537	0.000550561	Tat pathway signal sequence family protein
Zm00001d035475	-1.29835	0.00406696	Isovaleryl-CoA dehydrogenase mitochondrial		Zm00001d039928	1.41949	0.0294091	NA		Zm00001d017107	-1.20344	0.000551784	BCL-2 binding anthanogene-1
Zm00001d008759	0.336369	0.00407796	NA		Zm00001d026287	-1.00793	0.0294091	UDP-N-acetylglucosamine diphosphorylase 2		Zm00001d007677	0.266605	0.000552977	Sister-chromatid cohesion protein 3
Zm00001d026067	0.862919	0.00407796	cytochrome P450 family 704 subfamily A polypeptide 2		Zm00001d006700	0.636599	0.0294688	mTERF family protein		Zm00001d052744	1.81851	0.000553039	Lipopolysaccharide-modifying protein
Zm00001d002798	-1.04287	0.00410526	OJ000126_13.10 protein; protein		Zm00001d034032	-0.942006	0.0294788	Protein STRICTOSIDINE SYNTHASE-LIKE 3		Zm00001d006435	1.24671	0.000553039	Leucine-rich repeat extensin-like protein 3
Zm00001d001996	1.80671	0.00411801	NA		Zm00001d014753	0.437962	0.0294788	NA		Zm00001d045128	0.312029	0.000555064	Probable protein phosphatase 2C 22
Zm00001d033533	0.452528	0.00411931	Tetratricopeptide repeat (TPR)-like superfamily protein		Zm00001d022161	0.662232	0.0295505	Putative paramyosin		Zm00001d002873	-0.682125	0.000557988	UPF0426 protein chloroplastic
Zm00001d016705	-1.33882	0.00411931	ATPase inhibitor		Zm00001d053252	-2.96246	0.0295631	GDSL esterase/lipase		Zm00001d002373	0.410248	0.000561433	26S proteasome non-ATPase regulatory subunit 1 homolog B
Zm00001d026446	-1.20682	0.00412463	E3 ubiquitin-protein ligase MBR2		Zm00001d006348	0.457274	0.0296079	growth-regulating factor 9		Zm00001d006823	-1.18712	0.000568476	Peptide transporter PTR2
Zm00001d005735	0.749501	0.00414069	Protein kinase superfamily protein		Zm00001d016913	-1.22998	0.0296079	NA		Zm00001d031398	1.39771	0.000568518	receptor-like protein kinase 4
Zm00001d032111	0.697378	0.00416428	alpha/beta-Hydrolases superfamily protein		Zm00001d012505	-0.823632	0.0296682	Putative WRKY DNA-binding domain superfamily protein		Zm00001d002711	-0.47388	0.000568518	Serine racemase
Zm00001d049980	0.312344	0.00416762	Putative RNA helicase family protein		Zm00001d018345	-0.582281	0.0297467	NA		Zm00001d016294	-1.37736	0.000570856	Abscisic acid receptor PYL2
Zm00001d012917	-0.88166	0.00416762	Carbohydrate-binding X8 domain superfamily protein		Zm00001d038319	-0.593609	0.0297467	Protein LIKE COV 2		Zm00001d003160	-0.611497	0.000573953	NA
Zm00001d013343	0.861819	0.00423145	ACT domain-containing protein ACR1		Zm00001d051548	1.96812	0.0297653	Protein NRT1/ PTR FAMILY 8.3		Zm00001d000396	-0.435882	0.000577715	Protein kinase superfamily protein
Zm00001d027573	-0.485475	0.00423325	NA		Zm00001d038824	1.13122	0.0297653	Probable choline kinase 2		Zm00001d033782	2.5663	0.000578135	Seed maturation protein PM41
Zm00001d011561	0.500749	0.00423739	drought-induced 19		Zm00001d039653	-0.389899	0.0297761	multidrug resistance associated protein7		Zm00001d053518	-0.626644	0.000578135	Putative leucine-rich repeat protein kinase family protein
Zm00001d027293	0.297595	0.00424058	signal recognition particle protein subunit 9		Zm00001d008065	-1.61049	0.0298492	NA		Zm00001d039712	0.555374	0.000579319	Protein NETWORKED 4A
Zm00001d003626	-2.07557	0.00424058	NAC domain-containing protein 104		Zm00001d038969	-0.710712	0.0298492	Eukaryotic aspartyl protease family protein		Zm00001d008065	-1.69775	0.000579319	NA
Zm00001d008456	-0.829805	0.00424058	NA		Zm00001d051896	0.805018	0.0298684	Protein DOWNY MILDEW RESISTANCE 6		Zm00001d048073	-3.09387	0.00057976	Heat shock 70 kDa protein 8
Zm00001d010416	-0.666621	0.00424058	Transcription factor bHLH133		Zm00001d008455	0.909746	0.0298975	ARM repeat superfamily protein		Zm00001d003447	1.76028	0.000580731	NA
Zm00001d015138	0.806649	0.00424103	NA		Zm00001d002100	-0.850954	0.0300036	OSJNBa0033G05.6 protein; OSJNBa0063C18.20 protein; protein		Zm00001d006681	0.318443	0.000581552	NA
Zm00001d034277	-1.88634	0.00424164	Transcription factor JUNGBRUNNEN 1		Zm00001d008241	-2.09848	0.0300036	Embryonic protein DC-8		Zm00001d051990	-0.921616	0.000582095	Hydroxyproline-rich glycoprotein family protein
Zm00001d048718	0.623145	0.00424164	Galactose oxidase/kelch repeat superfamily protein		Zm00001d025012	1.23422	0.0300231	ABC transporter G family member 34		Zm00001d005934	1.02671	0.000584772	Purine permease 3
Zm00001d045074	0.396765	0.00424164	UDP-N-acetylglucosamine (UAA) transporter family		Zm00001d028560	-0.890553	0.0301362	LRR receptor-like serine/threonine-protein kinase FEI 1		Zm00001d037573	0.39918	0.000586461	USP family protein
Zm00001d002241	-0.300507	0.00425361	NA		Zm00001d029185	-2.49628	0.0301646	NA		Zm00001d033471	1.55224	0.00058998	Putative DNA-binding protein
Zm00001d009376	1.3509	0.00425922	Putative lysM-domain protein kinase family protein		Zm00001d047723	-1.17792	0.0302136	Tetratricopeptide repeat (TPR)-like superfamily protein		Zm00001d018754	-0.591726	0.00058998	Probable LRR receptor-like serine/threonine-protein kinase
Zm00001d053776	0.412038	0.00426183	Succinate-semialdehyde dehydrogenase mitochondrial		Zm00001d050308	-1.18125	0.0302435	U-box domain-containing protein 18		Zm00001d009178	1.55198	0.00058998	Serine carboxypeptidase-like 33
Zm00001d002824	0.747614	0.00426991	Vacuolar processing enzyme: beta-isozyme		Zm00001d027402	-2.05629	0.0302924	NA		Zm00001d027330	-1.80801	0.000592492	Remorin
Zm00001d043872	-1.37019	0.00428683	NA		Zm00001d040011	-1.08212	0.0303205	Protein ABA DEFICIENT 4 chloroplastic		Zm00001d012964	-0.43073	0.000592492	SEC14 cytosolic factor family protein / phosphoglyceride transfer family protein
Zm00001d000840	-4.08847	0.004294	NA		Zm00001d010380	1.16585	0.0303205	Zinc finger CCCH domain-containing protein 23		Zm00001d032663	-0.658521	0.000593487	NA
Zm00001d045153	0.29183	0.00430254	Cystathionine beta-lyase chloroplastic		Zm00001d052483	1.24529	0.0303395	Disease resistance protein RPM1		Zm00001d053697	0.396889	0.000593564	Methyl-CpG-binding domain-containing protein 9
Zm00001d037872	0.959314	0.0043065	Protein BONZAI 3		Zm00001d025055	1.97015	0.0303467	protein phosphatase homolog11		Zm00001d002272	0.427567	0.000593564	SIT4 phosphatase-associated family protein
Zm00001d038368	0.340605	0.0043065	Peptidyl-prolyl cis-trans isomerase		Zm00001d030577	1.20466	0.0304312	Light-inducible protein CPRF-2		Zm00001d019059	-0.59268	0.000593564	NA
Zm00001d040290	1.17688	0.00431615	Epoxide hydrolase 2		Zm00001d052781	0.648913	0.030446	Two-component response regulator-like APRR9		Zm00001d003401	0.542255	0.000597477	14-3-3-like protein GF14-6
Zm00001d014150	0.436455	0.00431615	Starch synthase IIc		Zm00001d029667	-1.02949	0.0304541	Membrane protein		Zm00001d029526	1.60845	0.000599822	cytochrome P-450 18
Zm00001d033029	1.70401	0.00431771	Cystathionine gamma-synthase 1 chloroplastic		Zm00001d036357	0.735989	0.0304975	Glycosyltransferase family 92 protein		Zm00001d043839	1.44093	0.000599822	NA
Zm00001d052675	-0.582314	0.00431771	Type III polyketide synthase B		Zm00001d013256	-0.585561	0.0305819	Brittle stalk-2-like protein 4		Zm00001d045729	0.803661	0.000599822	Protein NSP-INTERACTING KINASE 1
Zm00001d018501	-0.445783	0.00431771	Zim17-type zinc finger protein		Zm00001d020325	-0.500801	0.0305819	Putative potassium transporter 12		Zm00001d019092	1.41551	0.000599846	CLE family OsCLE701 protein; Os07g0194350 protein
Zm00001d032811	0.711551	0.00433136	Ras-related protein Rab-18		Zm00001d049186	1.48719	0.0305889	MYND finger family protein		Zm00001d049768	0.640823	0.000603274	oligopeptide transporter-like protein
Zm00001d029060	-0.874313	0.00433998	65-kDa microtubule-associated protein 3		Zm00001d018464	-1.34261	0.0305889	NA		Zm00001d038999	0.70447	0.000603507	drought-induced 19
Zm00001d001833	2.18513	0.00434497	Protein ASPARTIC PROTEASE IN GUARD CELL 2		Zm00001d034526	-2.08792	0.030596	NA		Zm00001d009726	2.01911	0.000605731	alpha/beta-Hydrolases superfamily protein
Zm00001d048332	-0.962732	0.00436242	Pentatricopeptide repeat-containing protein		Zm00001d014520	-4.47262	0.030596	NA		Zm00001d044022	3.23616	0.000605751	seed maturation protein PM41
Zm00001d053150	-0.559673	0.00436478	Putative HLH DNA-binding domain superfamily protein		Zm00001d011347	0.511849	0.0306513	Autophagy 7/ Autophagy-related 7		Zm00001d051915	0.794925	0.00060652	ABC(yeast) homolog1
Zm00001d018502	-1.13364	0.00436478	Protein kinase superfamily protein		Zm00001d012030	0.350657	0.0307975	E2 protein isoform 5		Zm00001d044235	2.29328	0.00060652	NA
Zm00001d019712	-0.513862	0.00436478	Sucrose responsive element binding protein		Zm00001d005933	1.33835	0.0307993	PUP1		Zm00001d013120	-0.854102	0.000607288	Cell differentiation Rcd1-like protein
Zm00001d050371	1.25645	0.00436674	Cytokinin hydroxylase		Zm00001d033610	0.537816	0.0307999	Zinc finger CCCH domain-containing protein 30		Zm00001d047923	-0.627505	0.000607417	Putative DUF869 domain containing family protein
Zm00001d032044	0.264385	0.00436901	Ypt/Rab-GAP domain of gyp1p superfamily protein		Zm00001d003436	-1.21549	0.0307999	Galactose mutarotase-like superfamily protein		Zm00001d013540	0.40672	0.000608036	E3 ubiquitin-protein ligase UPL7
Zm00001d002496	-1.44198	0.00436901	Heavy metal transport/detoxification superfamily protein		Zm00001d004650	-2.0812	0.0307999	CRP7 - Cysteine-rich family protein precursor expressed		Zm00001d043442	-1.62812	0.000609419	carotenoid cleavage dioxygenase8
Zm00001d043291	-0.939353	0.00436901	Purple acid phosphatase 10		Zm00001d024379	-0.465264	0.0307999	Xyloglucan endotransglucosylase/hydrolase protein 2		Zm00001d011606	0.329877	0.000609849	Ubiquitin-like superfamily protein
Zm00001d015007	-0.601496	0.00436901	Glutamate receptor 3.3		Zm00001d007181	-0.962936	0.0308251	Calcium-binding protein CML42		Zm00001d016651	-1.36346	0.000614248	NA
Zm00001d016234	-0.413089	0.00436901	RING/FYVE/PHD-type zinc finger family protein		Zm00001d010585	-0.924975	0.0308251	UTP--glucose-1-phosphate uridylyltransferase 3 chloroplastic		Zm00001d053249	2.84019	0.000614399	Germin-like protein subfamily 1 member 8
Zm00001d019487	1.5899	0.00436901	C2H2 and C2HC zinc fingers superfamily protein		Zm00001d038530	-0.623061	0.0308251	Putative inositol polyphosphate phosphatase (Synaptogenin-like) family protein		Zm00001d021634	-1.94609	0.000614425	Hsp20/alpha crystallin family protein
Zm00001d022371	-0.935449	0.00436901	Uncharacterised protein family (UPF0114)		Zm00001d028139	0.662402	0.0308263	Protein indeterminate-domain 2		Zm00001d006614	-0.421595	0.000615055	Probable protein phosphatase 2C 1
Zm00001d032739	-0.295646	0.00437645	Heterogeneous nuclear ribonucleoprotein 1		Zm00001d029331	-0.242204	0.0308263	Probable apyrase 5		Zm00001d008440	-1.90799	0.000615055	Putative peptidyl-prolyl cis-trans isomerase family protein
Zm00001d015163	-0.554099	0.00438973	Probable LRR receptor-like serine/threonine-protein kinase RKF3		Zm00001d029809	1.31009	0.0308263	DUF3783 domain protein		Zm00001d045397	-0.754898	0.000615055	U-box domain-containing protein 35
Zm00001d011424	0.448638	0.00439393	SCP1-like small phosphatase 4b		Zm00001d029980	-0.431655	0.0308263	Metacaspase-1		Zm00001d034546	-1.47093	0.000615629	Cupredoxin superfamily protein
Zm00001d013087	-1.02453	0.0043971	Acyl-CoA N-acyltransferases (NAT) superfamily protein		Zm00001d034187	-1.12906	0.0308263	Thioredoxin-like protein HCF164 chloroplastic		Zm00001d030584	-0.654647	0.000616974	DROUGHT SENSITIVE 1
Zm00001d051790	-0.600939	0.00440114	APO protein 2 chloroplastic		Zm00001d049572	0.342878	0.0308263	Sphingoid long-chain bases kinase 1		Zm00001d049848	-0.823607	0.000619466	NA
Zm00001d016436	1.38093	0.00441687	NA		Zm00001d044526	4.2307	0.0308263	Ran BP2/NZF zinc finger-like superfamily protein		Zm00001d052660	0.414898	0.000623424	Outer envelope protein 64 chloroplastic
Zm00001d037112	-0.786239	0.0044269	root-specific kinase 1		Zm00001d015912	2.86723	0.0308263	sugars will eventually be exported transporter4c		Zm00001d022504	1.58724	0.000629159	Sodium/hydrogen exchanger
Zm00001d015186	0.468622	0.0044306	Glycosyltransferase family 61 protein		Zm00001d017373	0.746478	0.0308263	RNA polymerase II C-terminal domain phosphatase-like 1		Zm00001d049028	1.80995	0.000629326	Chitinase 2
Zm00001d024143	-4.41958	0.00443149	NA		Zm00001d021836	-1.07199	0.0308263	Leucine-rich repeat (LRR) family protein		Zm00001d039694	-0.744531	0.000629996	ramosa2
ENSRNA049464595	0.75728	0.00444	NA		Zm00001d008962	0.522635	0.0308263	NA		Zm00001d037080	-1.09175	0.000629996	Putative leucine-rich repeat receptor-like protein kinase family protein
Zm00001d003958	-0.392267	0.00444362	Calmodulin-binding transcription activator 4		Zm00001d035233	-2.53885	0.0308263	NA		Zm00001d006913	1.89415	0.000633075	trehalose-6-phosphate phosphatase3
Zm00001d024873	-0.735991	0.00444544	AT-rich interactive domain-containing protein 2		Zm00001d037274	-0.584487	0.0308263	E2F transcription factor-like E2FE		Zm00001d037531	3.01873	0.000635189	Putative AP2/EREBP transcription factor superfamily protein
Zm00001d009844	0.591078	0.00445473	Serine/threonine-protein phosphatase		Zm00001d037425	0.729008	0.0308263	AT-hook motif nuclear-localized protein 10		Zm00001d017861	-1.60455	0.000638652	Protein binding protein
Zm00001d002938	-0.337443	0.00445505	Histone-lysine N-methyltransferase SUVR4		Zm00001d037962	-0.388675	0.0308263	malic enzyme5		Zm00001d031465	-1.0044	0.00063957	NA
Zm00001d035053	1.0168	0.00445505	Putative MADS-box transcription factor family protein		Zm00001d025667	0.746298	0.0308263	WPP domain-interacting protein 2		Zm00001d046531	0.490815	0.000641651	Protein WVD2-like 5
Zm00001d047833	-0.581089	0.00445781	Serine/threonine-protein kinase ATG1c		Zm00001d039541	-0.228621	0.0308303	C2H2 and C2HC zinc fingers superfamily protein		Zm00001d017841	-2.66512	0.000642228	Delta(12)-fatty-acid desaturase
Zm00001d000113	-0.99405	0.00447682	NA		Zm00001d033511	0.398793	0.0309166	Glycine-rich RNA-binding protein RZ1C		Zm00001d046521	-0.651841	0.000647178	Vacuolar protein sorting-associated protein 9A
Zm00001d023724	-0.360333	0.00449525	NA		Zm00001d026845	1.86742	0.0309166	NA		Zm00001d038003	-1.35347	0.000648213	NA
Zm00001d015182	0.734109	0.00450295	Bifunctional coenzyme A synthase		Zm00001d039870	-0.530027	0.030919	RHOMBOID-like protein 1		Zm00001d046652	0.575799	0.000648665	F11F12.5 protein
Zm00001d020227	-0.325068	0.00451656	transducin family protein / WD-40 repeat family protein		Zm00001d008872	-2.62382	0.030919	Putative AP2/EREBP transcription factor superfamily protein		Zm00001d032766	-1.04881	0.000649525	NA
Zm00001d048235	0.332419	0.00452503	transducin family protein / WD-40 repeat family protein		Zm00001d022457	2.59971	0.0309355	peroxidase3		Zm00001d052011	-1.20137	0.000651278	Heparanase-like protein 3
Zm00001d013411	-0.59921	0.00452677	UV-B-induced protein chloroplastic		Zm00001d028680	-0.629736	0.0310686	Ankyrin repeat-containing protein		Zm00001d041319	1.65416	0.000651278	nine-cis-epoxycarotenoid dioxygenase3
Zm00001d043555	0.350535	0.00452917	Protein farnesyltransferase subunit beta		Zm00001d002143	1.32392	0.0310686	Transcription factor TGA4		Zm00001d032591	0.288836	0.000652994	Endosomal targeting BRO1-like domain-containing protein
Zm00001d044648	-0.856709	0.00452917	Alpha-L-arabinofuranosidase 1		Zm00001d003447	1.70923	0.0310686	NA		Zm00001d008794	0.816326	0.000652994	Putative WRKY DNA-binding domain superfamily protein
Zm00001d052804	-1.68408	0.00455347	Putative MYB DNA-binding domain superfamily protein		Zm00001d014325	1.36155	0.0310686	Calcium-binding EF-hand family protein		Zm00001d029442	-0.999489	0.0006535	F-box only protein 13
Zm00001d013470	0.339549	0.00457166	Oxysterol-binding protein-related protein 1C		Zm00001d017107	-1.13163	0.0310686	BCL-2 binding anthanogene-1		Zm00001d015636	-1.64249	0.0006535	GDSL esterase/lipase
Zm00001d012912	-4.0346	0.00457874	NA		Zm00001d022305	0.477587	0.0310686	CDPK-related kinase 1		Zm00001d038485	2.4943	0.00065829	Serine/threonine-protein kinase STN8 chloroplastic
Zm00001d015776	-0.527378	0.00457874	NA		Zm00001d023176	0.685893	0.0310686	NA		Zm00001d038864	0.565697	0.000658555	DUF1639 family protein
Zm00001d053049	-0.883911	0.00458629	ATPase: coupled to transmembrane movement of substance/ ATPase: coupled to transmembrane movement of substances		Zm00001d035053	1.09389	0.0310749	Putative MADS-box transcription factor family protein		Zm00001d040611	-0.90246	0.00066151	Homeobox protein liguleless 3
Zm00001d023518	3.43637	0.004592	Auxin responsive protein		Zm00001d047347	1.44216	0.0310749	65-kDa microtubule-associated protein 3		Zm00001d025146	1.82121	0.000664207	NA
Zm00001d002064	0.681884	0.00459775	Glycosyltransferase		Zm00001d013993	-0.370725	0.0311161	NA		Zm00001d039910	-1.36572	0.000667551	Protein ASPARTIC PROTEASE IN GUARD CELL 1
Zm00001d039530	-0.632088	0.00459775	Protein TWIN LOV 1		Zm00001d009377	-1.04204	0.031126	NA		Zm00001d004088	-0.416018	0.000670541	NA
Zm00001d015693	0.385899	0.00459775	AUGMIN subunit 6		Zm00001d020714	0.785311	0.0311514	Heat shock factor protein 4		Zm00001d049163	-0.294872	0.00067353	SUMO-activating enzyme subunit 1B-2
Zm00001d020329	-0.479389	0.00459775	Remorin family protein		Zm00001d039029	1.24251	0.0312054	thiamine monophosphate synthase		Zm00001d010918	-0.779313	0.00067387	Plant IF-like protein
Zm00001d037962	0.358258	0.00459775	malic enzyme5		Zm00001d033012	0.67915	0.0312768	F-box/kelch-repeat protein SKIP11		Zm00001d022680	-3.04039	0.000675544	NA
Zm00001d026312	0.213288	0.00459775	Gamma-soluble NSF attachment protein		Zm00001d051057	-0.269453	0.0312768	Histone-lysine N-methyltransferase ASHR3		Zm00001d044648	-0.963618	0.000675582	Alpha-L-arabinofuranosidase 1
Zm00001d044320	-0.714608	0.00461211	OSJNBa0089E12.13 protein; protein		Zm00001d040127	-1.48205	0.0313585	Proline-rich receptor-like protein kinase PERK10		Zm00001d006853	2.94654	0.00067611	Protein STRICTOSIDINE SYNTHASE-LIKE 6
Zm00001d025868	-1.2817	0.00461248	Cytokinin riboside 5'-monophosphate phosphoribohydrolase LOG3		Zm00001d044826	-2.38073	0.0313944	NOD26-like membrane intrinsic protein2		Zm00001d051914	-1.56215	0.000681897	NA
Zm00001d051846	-0.433679	0.00462319	Calcium-dependent lipid-binding (CaLB domain) family protein		Zm00001d029527	-0.625411	0.0314979	Protein SPIRAL1		Zm00001d024798	2.03569	0.000683395	NA
Zm00001d013245	0.60466	0.00462319	UDP-glucose 6-dehydrogenase		Zm00001d041945	0.294533	0.0316026	transducin family protein / WD-40 repeat family protein		Zm00001d028218	0.243816	0.000684048	Methionine--tRNA ligase cytoplasmic
Zm00001d018696	0.547352	0.00462319	SKU5 similar 17		Zm00001d053122	0.499221	0.0316134	S-adenosylmethionine-dependent methyltransferase/ catalytic		Zm00001d053641	-0.406996	0.000684048	NA
Zm00001d002441	0.849251	0.00464171	P-loop containing nucleoside triphosphate hydrolases superfamily protein		Zm00001d008600	-1.28605	0.0316134	Sulfoquinovosyl transferase SQD2		ENSRNA049464622	0.938478	0.000684048	NA
Zm00001d045475	-0.349118	0.00464331	Histone H3		Zm00001d048487	1.35016	0.0316134	NA		Zm00001d027187	-1.34169	0.000684048	NA
Zm00001d026618	-0.652495	0.00464331	NA		Zm00001d022247	-0.864137	0.0316138	calcium ion binding		Zm00001d034345	0.786976	0.000685593	Ferredoxin--NADP reductase root isozyme 1 chloroplastic
Zm00001d039859	1.02931	0.00465004	Metallothionein-like protein type 2		Zm00001d039112	-1.38128	0.0316408	DUF1645 family protein		Zm00001d007207	-0.301066	0.000696068	Probable protein phosphatase 2C 5
Zm00001d008939	2.03417	0.00465558	Protein FLOWERING LOCUS T		Zm00001d027092	-2.33914	0.0316408	NA		Zm00001d053724	-0.545696	0.000697416	NA
Zm00001d034032	0.859284	0.00468932	Protein STRICTOSIDINE SYNTHASE-LIKE 3		Zm00001d041790	0.889499	0.0316465	Expressed protein; protein		Zm00001d017395	-0.601142	0.000697416	Thylakoid lumenal protein TL20.3 chloroplastic
Zm00001d015354	-0.944527	0.00468932	Auxin-responsive protein SAUR71		Zm00001d043767	0.36085	0.0316465	D-cysteine desulfhydrase 2 mitochondrial		Zm00001d007501	0.721129	0.000698674	NA
Zm00001d044646	0.732589	0.00469748	glucosamine fructose-6-phosphate aminotransferase1		Zm00001d000165	0.718247	0.0316465	Bromodomain transcription factor		Zm00001d000428	0.460797	0.000698674	Transmembrane 9 superfamily member 9
Zm00001d030892	-0.501859	0.0047018	NA		Zm00001d033325	-2.78748	0.0316667	Dof zinc finger protein DOF1.6		Zm00001d030921	5.25698	0.00070168	NA
Zm00001d016456	0.79226	0.00470618	High mobility group B protein 15		Zm00001d034650	-0.606742	0.0317339	SEC14 cytosolic factor family protein / phosphoglyceride transfer family protein		Zm00001d048529	0.230275	0.000704734	Developmentally-regulated GTP-binding protein 2
Zm00001d037329	-0.851161	0.00470618	Encodes a protein whose expression is responsive to nematode infection.		Zm00001d004931	-1.03589	0.0318417	Heavy metal transport/detoxification superfamily protein		Zm00001d006297	1.49796	0.000704929	G-type lectin S-receptor-like serine/threonine-protein kinase B120
Zm00001d026586	-0.694345	0.00471085	Lysine-specific histone demethylase 1		Zm00001d011740	0.896313	0.0318906	Senescence-associated protein 12		Zm00001d045600	-1.23522	0.000704929	NAC domain-containing protein 26
Zm00001d052616	-1.44729	0.00471091	Phospholipase A2		Zm00001d014811	0.496352	0.0319013	DNL zinc finger family protein		Zm00001d026454	-1.31239	0.000705622	NA
Zm00001d052233	-0.751617	0.00471487	phosphoglycerate/bisphosphoglycerate mutase		Zm00001d038342	-0.860958	0.0319013	RING/FYVE/PHD zinc finger superfamily protein		Zm00001d028505	-1.24998	0.000705872	Phospholipase A2-alpha
Zm00001d047259	1.9363	0.00472718	NA		Zm00001d025958	-2.07257	0.0319355	Aldehyde dehydrogenase		Zm00001d013035	0.828911	0.000705872	Cycloartenol-C-24-methyltransferase
Zm00001d022537	-0.598686	0.00472821	Pentatricopeptide repeat-containing protein mitochondrial		Zm00001d029636	-1.12036	0.0319638	Protein SRG1		Zm00001d025082	1.13842	0.000706256	Glycosyl hydrolase family 10 protein
Zm00001d017682	-0.774993	0.00473614	PLATZ transcription factor family protein		Zm00001d030846	0.401638	0.0320343	Metal transporter Nramp3		Zm00001d003949	-1.27016	0.000707742	Major facilitator superfamily protein
Zm00001d047079	0.443328	0.00473927	G2484-1 protein		Zm00001d006659	-0.981096	0.0322667	Constitutive photomorphogenesis protein 10		Zm00001d003271	0.845393	0.000710076	Peptide methionine sulfoxide reductase
Zm00001d026458	-0.712834	0.00473927	Cysteine protease 1		Zm00001d003124	-0.579663	0.0323648	DNA glycosylase superfamily protein		Zm00001d008849	-0.998916	0.000710112	OSJNBa0089E12.13 protein; protein
Zm00001d045738	-1.83284	0.00474351	Zinc finger protein 6		Zm00001d012882	0.441278	0.0323981	Protein kinase protein with adenine nucleotide alpha hydrolases-like domain		Zm00001d025984	0.875624	0.000710112	glutamic dehydrogenase2
Zm00001d025016	-0.739901	0.00474351	Thioredoxin superfamily protein		Zm00001d018408	-1.49872	0.0324294	Vesicle-associated membrane protein 711		Zm00001d035579	-0.66004	0.000712463	Nudix hydrolase 9
Zm00001d014517	2.27384	0.00474951	NA		Zm00001d005594	0.703287	0.0324321	Sugar transport protein 14		Zm00001d041489	-0.520137	0.000713225	Homeobox-leucine zipper protein ATHB-14
Zm00001d014796	-0.606658	0.00474951	NEP1-interacting protein-like 1		Zm00001d040497	5.27888	0.0325169	Type III polyketide synthase B		Zm00001d047058	-0.470316	0.000718226	Tobamovirus multiplication protein 2B
Zm00001d022089	0.98059	0.00476565	EGG APPARATUS-1 protein		Zm00001d037318	2.01244	0.0325169	Putative AMP-dependent synthetase and ligase superfamily protein		Zm00001d049704	1.54431	0.000721045	HXXXD-type acyl-transferase family protein
Zm00001d021579	0.982241	0.00476927	Filament-like plant protein 3		Zm00001d029862	-0.756226	0.0325322	Probable xyloglucan galactosyltransferase GT19		Zm00001d020236	-0.567599	0.000721462	NA
Zm00001d038373	-0.637581	0.00476927	O-fucosyltransferase family protein		Zm00001d032013	3.24049	0.0325322	NA		Zm00001d047110	1.47847	0.000721462	trehalose-6-phosphate phosphatase11
Zm00001d033839	0.690814	0.00477102	Probable LRR receptor-like serine/threonine-protein kinase		Zm00001d042345	2.71739	0.0325322	PIN-formed protein5		Zm00001d044364	0.362837	0.000721796	NA
Zm00001d034863	-0.500539	0.00481394	Retrovirus-related Pol polyprotein from transposon TNT 1-94		Zm00001d043986	-0.549676	0.0325322	Pyruvate kinase		Zm00001d013181	-1.35342	0.000721796	Pentatricopeptide repeat-containing protein DWY1 chloroplastic
Zm00001d040051	0.415536	0.00482171	ARM repeat superfamily protein		Zm00001d009178	1.49387	0.0325322	Serine carboxypeptidase-like 33		Zm00001d006094	3.00073	0.000726621	Zea mays MADS27
Zm00001d031959	-1.21459	0.00483352	Fatty acyl-CoA reductase 1		Zm00001d036947	1.49264	0.0325322	Leucine-rich repeat protein kinase family protein		Zm00001d021639	-1.46873	0.000726621	Taxane 13-alpha-hydroxylase
Zm00001d032101	0.24289	0.00483352	Formin-like protein 14		Zm00001d046346	2.72541	0.0325322	Putative HLH DNA-binding domain superfamily protein		Zm00001d047126	0.56939	0.000727175	Phosphatidylinositol N-acetyglucosaminlytransferase subunit P-related
Zm00001d013707	0.667834	0.00483352	Auxin-responsive protein IAA4		Zm00001d034756	1.26426	0.0326623	NA		Zm00001d042747	-0.595166	0.000728846	Serine/threonine-protein kinase Nek5
Zm00001d035596	-3.50005	0.00483593	Anaphase-promoting complex subunit 4		Zm00001d026147	-1.86029	0.0326623	plant color component at R1		Zm00001d018906	-0.724862	0.000728846	NA
Zm00001d032710	0.476893	0.00484051	Vacuolar protein sorting-associated protein 2 homolog 3		Zm00001d029777	-1.01131	0.0327689	Protein EXORDIUM-like 5		Zm00001d031855	-2.02841	0.000729883	GDSL esterase/lipase LTL1
Zm00001d051917	-0.783469	0.00484051	Phosphatidylinositol N-acetyglucosaminlytransferase subunit P-related		Zm00001d046896	-1.61784	0.0328618	NA		Zm00001d012924	-0.482313	0.000734581	Non-specific phospholipase C1
Zm00001d041824	1.24893	0.00484051	Tat pathway signal sequence family protein		Zm00001d002159	-1.17293	0.0329026	Wound induced protein		Zm00001d006118	0.323519	0.000737659	Protein farnesyltransferase/geranylgeranyltransferase type-1 subunit alpha
Zm00001d019576	-0.703224	0.00484367	ORMDL family protein		Zm00001d014858	0.586147	0.0329026	DNA-binding protein MNB1B		Zm00001d014519	-0.43121	0.000741653	Translation machinery associated TMA7
Zm00001d013456	0.583824	0.00486014	FKBP-type peptidyl-prolyl cis-trans isomerase 5 isoform 2		Zm00001d038375	-0.275425	0.032903	Cysteine--tRNA ligase 1 cytoplasmic		Zm00001d043468	-0.341292	0.000748628	trehalose-6-phosphate synthase6
Zm00001d042712	0.501263	0.00486688	NA		Zm00001d032601	-1.33085	0.0330101	ABC transporter G family member 11		Zm00001d037918	1.17901	0.000750158	Non-cyanogenic beta-glucosidase
Zm00001d048692	-1.15066	0.00487525	Magnesium/proton exchanger		Zm00001d042022	1.72737	0.0330101	Peroxidase 12		Zm00001d010466	0.48368	0.000750657	Glycosyltransferase family 61 protein
Zm00001d040755	1.81408	0.00487525	Exocyst complex component 7		Zm00001d036057	0.430534	0.0330101	Thioredoxin superfamily protein		Zm00001d018701	3.1841	0.000750809	Galactoside 2-alpha-L-fucosyltransferase
Zm00001d014509	-5.58027	0.00487525	NAD(P)-binding Rossmann-fold superfamily protein		Zm00001d003067	0.704386	0.0330253	Protein root UVB sensitive 2 chloroplastic		Zm00001d031451	-1.60895	0.000752975	SBP-domain protein 5
Zm00001d036139	2.09686	0.00487525	NA		Zm00001d033795	0.263061	0.0330337	Dihydroxyacetone kinase		Zm00001d035973	-0.60716	0.000753514	Protein ENHANCED DISEASE RESISTANCE 2
Zm00001d045055	1.08217	0.00487525	Anthocyanidin 3-O-glucosyltransferase		Zm00001d002596	1.47991	0.0330337	NA		ZeamMp152	1.10552	0.000756732	NA
Zm00001d024018	-0.7166	0.00487525	P-loop containing nucleoside triphosphate hydrolases superfamily protein		Zm00001d005889	-3.02027	0.0330452	abscisic acid 8'-hydroxylase5		Zm00001d008241	-2.37699	0.000757207	Embryonic protein DC-8
Zm00001d041453	0.56231	0.00487631	Paired amphipathic helix protein Sin3-like 3		Zm00001d044728	-2.5229	0.0330452	Class I heat shock protein 3		Zm00001d028287	1.45039	0.000762995	Calcium uniporter protein 4 mitochondrial
Zm00001d037628	-0.938362	0.00487897	Putative ankyrin repeat domain family protein		Zm00001d023294	1.63863	0.0330481	NAC transcription factor 29		Zm00001d018630	-1.18298	0.000764158	Disease resistance response protein 206
Zm00001d013653	0.291399	0.00487978	transcription regulator NOT2/NOT3/NOT5 family protein		Zm00001d037278	-0.561275	0.0330938	phosphofructose kinase1		Zm00001d041824	1.39974	0.000764232	Tat pathway signal sequence family protein
Zm00001d005094	-0.487017	0.00488573	Bifunctional monothiol glutaredoxin-S16 chloroplastic		Zm00001d045184	1.45416	0.0330938	Protein kinase superfamily protein		Zm00001d024751	1.42209	0.000764644	Peroxidase 64
Zm00001d036925	-1.72828	0.00489292	Protein kinase Kelch repeat:Kelch		Zm00001d008248	0.788727	0.0330988	NA		Zm00001d011589	0.869293	0.000764685	NAC domain-containing protein 72
Zm00001d006185	0.508748	0.00491566	6-phosphogluconolactonase		Zm00001d027411	-1.11346	0.0331526	Peroxidase 64		Zm00001d036057	0.446473	0.000773071	Thioredoxin superfamily protein
Zm00001d002541	1.07152	0.00495128	Transducin/WD40 repeat-like superfamily protein		Zm00001d032088	-1.07021	0.0331526	SAUR33-auxin-responsive SAUR family member		Zm00001d038288	-1.17462	0.000777778	Putative MYB DNA-binding domain superfamily protein
Zm00001d016792	-0.518662	0.00495449	OSJNBa0088K19.7 protein		Zm00001d004308	-1.51054	0.0332001	phosphate transporter protein5		Zm00001d024454	1.65803	0.000777778	Plant elicitor peptide 4
Zm00001d039706	-0.572953	0.0049562	Zinc finger: C3HC4 type family protein		Zm00001d000361	0.649485	0.0332134	Transcription factor MYB104		Zm00001d016814	-1.57466	0.00077824	NAC domain-containing protein 104
Zm00001d046134	-1.34119	0.0049562	Glycosyl hydrolase superfamily protein		Zm00001d006185	-0.5489	0.0333201	6-phosphogluconolactonase		Zm00001d019753	-1.14976	0.000780128	Probable pectinesterase 15
Zm00001d051525	-0.777113	0.00495907	Oligopeptide transporter 4		Zm00001d047911	-1.32813	0.0333201	HVA22-like protein i		Zm00001d025310	-1.2888	0.000780763	Putative RING zinc finger domain superfamily protein
Zm00001d021877	0.501699	0.00495907	Adenylyl-sulfate kinase1		Zm00001d029553	-2.68072	0.0333861	C2H2-like zinc finger protein		Zm00001d049965	0.438459	0.000782721	Ribonucleoprotein
Zm00001d048989	1.48125	0.00496212	Probable protein phosphatase 2C 30		Zm00001d036925	1.84506	0.0334074	Protein kinase Kelch repeat:Kelch		Zm00001d018825	-0.700842	0.000783426	Protein kinase superfamily protein
Zm00001d030851	0.949233	0.00497344	Cytochrome P450 CYP81N5		Zm00001d037894	2.09322	0.0334661	Dehydrin DHN1		Zm00001d034346	0.380783	0.000801668	Accelerated cell death 11
Zm00001d036547	0.254287	0.00497344	Translation machinery associated TMA7		Zm00001d046323	0.87067	0.0334694	NA		Zm00001d043296	1.1304	0.000803099	zinc knuckle (CCHC-type) family protein
Zm00001d002357	-0.824958	0.00498779	Protein kinase superfamily protein		Zm00001d051135	-0.480723	0.0335057	Putative casein kinase family protein		Zm00001d028338	-0.648895	0.00080589	NA
Zm00001d036900	2.19121	0.00498795	Cellulose synthase A catalytic subunit 7		Zm00001d032646	-0.50538	0.033643	RHC1A		Zm00001d013818	-1.59545	0.00081043	Tryptophan N-monooxygenase 2
Zm00001d047644	1.09979	0.00499984	Putative bZIP transcription factor superfamily protein		Zm00001d037783	1.35583	0.033643	Putative receptor protein kinase ZmPK1		Zm00001d021892	-1.72242	0.000814139	Ethylene-responsive transcription factor RAP2-11
Zm00001d052964	1.99504	0.00500143	Bax inhibitor-1 family protein		Zm00001d046947	0.747971	0.0336711	Putative MYB DNA-binding domain superfamily protein		Zm00001d051689	-1.59884	0.000815681	Putative IQ calmodulin-binding and BAG domain containing family protein
Zm00001d031806	1.75035	0.0050101	NA		Zm00001d045454	-1.39906	0.0336831	Zinc finger (C3HC4-type RING finger) family protein		Zm00001d040441	-1.75631	0.000818025	NA
Zm00001d043666	-0.350455	0.0050101	Protein PLASTID MOVEMENT IMPAIRED 1-RELATED 1		Zm00001d053544	-0.567472	0.033707	U-box domain-containing protein 17		Zm00001d037703	-2.28262	0.000818025	NA
Zm00001d034878	-0.75032	0.00503936	Ribonuclease P protein subunit P38-related		Zm00001d038853	0.93655	0.0337796	NA		Zm00001d033965	0.955491	0.000818207	Protein WRKY1
Zm00001d050913	-0.390337	0.00503936	NA		Zm00001d043458	-1.55879	0.033822	GDSL esterase/lipase		Zm00001d051879	0.305476	0.000818536	NAC domain containing protein 71
Zm00001d028445	-1.23952	0.00504122	RAD-like 3		Zm00001d017608	0.48646	0.033822	methyl erythritol cyclodiphosphate synthase2		Zm00001d012697	-2.92796	0.000818536	Putative CBL-interacting protein kinase family protein
Zm00001d005849	0.849079	0.00504425	Histone H3 K4-specific methyltransferase SET7/9 family protein		Zm00001d002149	0.287372	0.0339009	Probable galacturonosyltransferase 10		Zm00001d047334	0.856757	0.000820972	Zinc finger protein AZF2
Zm00001d017461	0.861974	0.00506277	NA		Zm00001d011805	0.296926	0.0339107	Putative regulator of chromosome condensation (RCC1) family protein		Zm00001d033283	-0.860498	0.000823715	VAN3-binding protein
Zm00001d005951	-0.652538	0.00506701	Homeobox-leucine zipper protein ATHB-6		Zm00001d017770	0.598854	0.0339268	Soluble inorganic pyrophosphatase 2		Zm00001d047421	0.477958	0.000827953	Probable transcription factor
Zm00001d013599	0.242423	0.00506718	Nuclear poly(A) polymerase 1		Zm00001d051435	-1.39961	0.0339289	NA		Zm00001d013119	-0.731728	0.00082796	Transcription factor TCP2
Zm00001d032079	0.990009	0.00507518	Riboflavin synthase-like superfamily protein		Zm00001d020490	-1.20083	0.0339289	Transcription factor bHLH69		Zm00001d036044	0.853381	0.000832554	damaged DNA binding;exodeoxyribonuclease IIIs
Zm00001d046149	-0.950428	0.00507518	DUF679 domain membrane protein 7		Zm00001d036775	-1.07071	0.0339355	Putative STRUBBELIG family receptor protein kinase		Zm00001d038149	-1.08827	0.000835054	NA
Zm00001d018111	0.410637	0.00507781	F-box protein FBW2		Zm00001d052813	1.55622	0.0339429	UDP-glycosyltransferase 89B1		Zm00001d047420	-1.33095	0.000835579	DUF679 domain membrane protein 2
Zm00001d046492	-0.677504	0.00508956	elongated mesocotyl2		Zm00001d041578	-3.06552	0.0339429	Expressed protein; protein		Zm00001d028398	0.869188	0.000836497	Glycosyl hydrolase family 10 protein
Zm00001d048413	1.06514	0.00510045	Peroxidase 60		Zm00001d016791	-3.5046	0.0339721	Agamous-like MADS-box protein AGL80		Zm00001d037340	-1.07023	0.000836497	NA
Zm00001d030083	-0.615036	0.00511553	low phytic acid2		Zm00001d021628	0.965152	0.0339721	NA		Zm00001d048230	0.754093	0.000841685	E3 ubiquitin-protein ligase ATL6
Zm00001d050694	1.14496	0.00512131	Serine decarboxylase		Zm00001d005185	0.298738	0.0340596	PHD finger protein ALFIN-LIKE 2		Zm00001d013603	-0.772371	0.000843	Type IV inositol polyphosphate 5-phosphatase 7
Zm00001d045026	0.756936	0.0051337	Auxin response factor 7		Zm00001d024421	0.547712	0.0340596	Phosphopantothenate--cysteine ligase 1		Zm00001d032179	-2.95859	0.000845469	Transcription factor MYB30
Zm00001d018465	0.756384	0.00514067	NA		Zm00001d032613	-0.946394	0.0340683	Pollen receptor-like kinase 4		Zm00001d042136	0.400885	0.000845469	Serine/arginine repetitive matrix protein 2 isoform 4
Zm00001d038311	-0.379033	0.00516257	G-box-binding factor 4		Zm00001d042263	1.07563	0.0340683	Inducer of CBF expression 2		Zm00001d018954	1.15112	0.000846896	Rhicadhesin receptor
Zm00001d043149	0.224132	0.00517127	Leucine-rich repeat (LRR) family protein		Zm00001d016918	0.335871	0.0340683	Ubiquitin carboxyl-terminal hydrolase		Zm00001d049550	0.838049	0.00084855	topoisomerase-like enzyme2
Zm00001d037354	0.623999	0.00517745	alpha/beta-Hydrolases superfamily protein		Zm00001d021224	0.71614	0.0340683	F-box protein PP2-A13		Zm00001d045327	0.579979	0.000866612	Pyridoxal-5'-phosphate-dependent enzyme family protein
Zm00001d017422	0.966032	0.00520196	Homeobox-leucine zipper protein ATHB-6		Zm00001d028009	-0.321069	0.0340738	Probable mitochondrial adenine nucleotide transporter BTL2		Zm00001d041418	-0.919687	0.000867393	Auxin-responsive protein IAA4
Zm00001d037023	-2.15268	0.00520201	Putative RING zinc finger domain superfamily protein		Zm00001d034124	-0.564154	0.0341548	Probable prolyl 4-hydroxylase 9		Zm00001d006438	0.318241	0.000867788	Regulator of nonsense transcripts 1 homolog
Zm00001d045207	-1.64673	0.00520878	Putative S-locus-like receptor protein kinase family protein		Zm00001d014667	-0.600704	0.0341548	DUF4228 domain protein		Zm00001d035195	-1.59311	0.000867788	Protein LSD1
Zm00001d008846	0.391104	0.00521222	Glutaminyl-tRNA synthetase		Zm00001d017474	-1.46121	0.0341548	NA		Zm00001d036635	0.524518	0.000867788	Molybdenum cofactor sulfurase
Zm00001d017528	-1.00898	0.00521825	Cytochrome P450 CYP86A35		Zm00001d036608	-0.950416	0.0341548	Glycosyl hydrolases family 31 protein		Zm00001d048608	-1.57633	0.000873349	Putative DUF231 domain containing family protein
Zm00001d017029	0.399284	0.00521876	phosphoinositide binding		Zm00001d045311	1.54071	0.0341548	Hydrolase-like protein family		Zm00001d042074	0.26102	0.000873349	Regulator of chromosome condensation (RCC1) family with FYVE zinc finger domain
Zm00001d048723	-1.594	0.00521953	Tropinone reductase homolog		Zm00001d031540	0.258957	0.0341719	Pyridoxamine 5'-phosphate oxidase family protein		Zm00001d015729	0.267007	0.000874365	Peptidyl-prolyl cis-trans isomerase CYP95
Zm00001d044026	0.242732	0.00521953	Transducin/WD40 repeat-like superfamily protein		Zm00001d029290	-1.36613	0.0342569	Cytochrome P450 CYP709H1		Zm00001d033892	-0.930112	0.000879479	Core-2/I-branching beta-16-N-acetylglucosaminyltransferase family protein
Zm00001d015638	0.948842	0.00521953	NA		Zm00001d009637	2.63915	0.0342569	NA		zma-MIR399g	-3.82099	0.000879479	NA
Zm00001d023238	-0.493103	0.00521953	Long chain acyl-CoA synthetase 6 peroxisomal		Zm00001d028691	0.310512	0.0342861	Expressed protein; protein		ENSRNA049997266	-3.82099	0.000879479	NA
Zm00001d007682	-0.366999	0.00522145	2-oxoglutarate (2OG) and Fe(II)-dependent oxygenase superfamily protein		Zm00001d014366	-1.00924	0.0343311	SKU5 similar 4		Zm00001d042013	0.786785	0.000879479	receptor-like protein kinase 1
Zm00001d053092	-0.497476	0.0052416	NA		Zm00001d041746	2.35715	0.0343345	Pinoresinol reductase 2		Zm00001d025820	-0.655022	0.000879748	Transducin/WD40 repeat-like superfamily protein
Zm00001d029389	-0.953638	0.00525778	LOL3		Zm00001d020943	-0.346218	0.0343345	O-fucosyltransferase family protein		Zm00001d032546	0.49151	0.00088208	Monothiol glutaredoxin-S17
Zm00001d008812	-1.3217	0.00525778	C3H47 C3H type transcription factor		Zm00001d002738	1.69639	0.0343965	Probable aquaporin TIP2-2		Zm00001d007189	-0.553206	0.000883148	(+)-neomenthol dehydrogenase
Zm00001d012574	1.39454	0.00525778	Probable inactive purple acid phosphatase 1		Zm00001d027978	1.67171	0.0344548	Purine permease 3		Zm00001d045298	-0.728236	0.000883148	Lipase-like
Zm00001d035080	1.9986	0.00525778	NA		Zm00001d033234	-0.813686	0.0344706	Protein kinase PINOID		Zm00001d025479	1.49057	0.000883148	Putative MADS-box transcription factor family protein
Zm00001d038167	0.756799	0.00525778	Lipase		Zm00001d038890	-0.391177	0.0344994	Acid phosphatase/vanadium-dependent haloperoxidase-related protein		Zm00001d045564	-1.12077	0.000888577	Haloacid dehalogenase-like hydrolase domain-containing protein Sgpp
Zm00001d039379	0.606278	0.00527069	sodium/calcium exchanger family protein / calcium-binding EF hand family protein		Zm00001d016732	-0.422242	0.0346014	bZIP protein		Zm00001d030953	0.294655	0.000892822	Zinc ion binding protein
Zm00001d016825	-0.341387	0.00528039	SPla/RYanodine receptor (SPRY) domain-containing protein		Zm00001d040670	1.23523	0.0346153	Lipoamide acyltransferase component of branched-chain alpha-keto acid dehydrogenase complex mitochondrial		Zm00001d007351	-1.71174	0.000893781	Esterase
Zm00001d027703	-0.680229	0.00528153	L-ornithine N5-acetyltransferase NATA1		Zm00001d006375	1.74178	0.0346239	Probable trehalose-phosphate phosphatase F		Zm00001d015435	-0.440989	0.000893781	Protein STRUBBELIG-RECEPTOR FAMILY 1
Zm00001d029390	-0.535105	0.00528153	NA		Zm00001d028887	3.65453	0.0346397	nicotianamine synthase9		Zm00001d013964	0.525365	0.000896358	ALG2-interacting protein X
Zm00001d053586	-0.994164	0.00528476	Putative cytochrome P450 superfamily protein		Zm00001d027375	1.24383	0.034791	LysM domain containing protein		Zm00001d027714	-0.46068	0.000896692	ribosomal large subunit pseudouridine synthase B
Zm00001d011283	-0.321308	0.00528773	NA		Zm00001d032866	1.17709	0.034791	UDP-glycosyltransferase 86A2		Zm00001d020178	-0.324384	0.000896819	Retinol dehydrogenase 13
Zm00001d041450	0.713222	0.00529631	Paired amphipathic helix protein Sin3-like 3		Zm00001d044982	-0.85805	0.034791	Kinesin-like protein KIN-7K chloroplastic		Zm00001d039005	0.313639	0.000896819	Guanylate-binding family protein
Zm00001d013038	-1.27342	0.00529648	Cupredoxin superfamily protein		Zm00001d009923	-1.60593	0.0348281	NA		Zm00001d040123	0.36273	0.000898779	Paired amphipathic helix protein Sin3-like 3
Zm00001d007457	-0.820052	0.00531606	NA		Zm00001d038964	0.83053	0.0348281	NA		Zm00001d027601	2.36894	0.000898825	cytochrome P450 family 96 subfamily A polypeptide 1
Zm00001d047937	0.652192	0.00531606	armadillo repeat only 1		Zm00001d053725	-0.497777	0.0349106	Protein kinase superfamily protein		Zm00001d011891	0.381718	0.000898825	S-formylglutathione hydrolase
Zm00001d016085	-1.17719	0.00533005	NA		Zm00001d039706	0.611056	0.0349562	Zinc finger: C3HC4 type family protein		Zm00001d037142	0.298804	0.000901787	Putative transcription elongation factor SPT5 homolog 1
Zm00001d014897	0.203908	0.00535208	proline-rich spliceosome-associated (PSP) family protein		Zm00001d022106	0.625695	0.0349626	Acidic leucine-rich nuclear phosphoprotein 32-related protein		Zm00001d022367	-1.38936	0.00090841	Beta-glucosidase 44
Zm00001d017536	-1.22789	0.00535968	Major facilitator superfamily protein		Zm00001d003724	-2.21414	0.0351093	SWIb domain-containing protein		Zm00001d025915	-0.398026	0.00091822	Syntaxin-81
Zm00001d009557	-1.25407	0.00535968	DUF679 domain membrane protein 7		Zm00001d028572	-0.536371	0.0351244	Mannose-1-phosphate guanylyltransferase 1		Zm00001d004978	0.666043	0.000918281	Saccharopine dehydrogenase
Zm00001d028994	0.344286	0.00538208	U11/U12 small nuclear ribonucleoprotein 65 kDa protein		Zm00001d002057	-2.79911	0.0351244	Ripening-related protein 3		Zm00001d028751	-1.08338	0.000922035	Protein ESKIMO 1
Zm00001d052992	0.687353	0.0053939	Disease resistance protein RPM1		Zm00001d017906	-1.14503	0.0351244	O-fucosyltransferase family protein		Zm00001d000038	-1.49078	0.000924149	Serine/threonine-protein kinase D6PKL1
Zm00001d040737	1.889	0.0053939	gibberellin 2-oxidase5		Zm00001d047639	3.60358	0.0351244	nicotianamine synthase6		Zm00001d005996	2.22105	0.000925989	Photosystem I reaction center subunit V
Zm00001d044759	-0.346997	0.0053939	Alpha-mannosidase 2		Zm00001d003181	-0.986973	0.0351477	Cytochrome b561 and DOMON domain-containing protein		Zm00001d020872	0.677215	0.000925989	NA
Zm00001d012932	-0.27965	0.00540368	S-adenosyl-L-methionine-dependent methyltransferases superfamily protein		Zm00001d006916	0.595389	0.0352169	DNA-directed RNA polymerase II protein		Zm00001d052107	-0.773361	0.000927389	Fatty-acid-binding protein 2
Zm00001d011037	-0.452749	0.00540368	MAP kinase phosphatase isoform 1/ MAP kinase phosphatase isoform 2		Zm00001d021459	3.56766	0.0353547	Auxin-responsive protein SAUR61		Zm00001d035871	-1.37549	0.000945497	GDSL esterase/lipase
Zm00001d003632	1.06291	0.00542432	regulator of chromosome condensation2		Zm00001d013168	-1.20883	0.035387	Probable xyloglucan glycosyltransferase 12		Zm00001d041538	-1.53115	0.000946317	NA
Zm00001d016744	-0.499903	0.00542432	NA		Zm00001d052545	1.34193	0.0354681	NA		Zm00001d042168	-0.680504	0.000946718	zinc finger (C3HC4-type RING finger) family protein
Zm00001d046926	2.23974	0.00542432	Protein kinase superfamily protein		Zm00001d051460	0.629589	0.0355172	Putative RING zinc finger domain superfamily protein/ RING zinc finger protein-like		Zm00001d042380	-0.993578	0.000946941	Pentatricopeptide repeat-containing protein chloroplastic
Zm00001d002980	-0.3612	0.00543668	Protein RETICULATA chloroplastic		Zm00001d046927	1.50113	0.0355172	Protein GLUTAMINE DUMPER 5		Zm00001d021592	0.362273	0.000950445	Probable potassium transporter 15
Zm00001d047539	-0.661357	0.00543668	Putative RNA-binding zinc finger family protein		Zm00001d032857	0.76001	0.0355807	Protein kinase superfamily protein		Zm00001d011378	1.20973	0.000950503	Putative DUF1221-domain containing protein kinase family protein
Zm00001d008781	-0.667257	0.00544296	Protein MEI2-like 1		Zm00001d043512	1.24043	0.0355807	Protein kinase family protein with leucine-rich repeat domain		Zm00001d005802	1.25785	0.000955494	SAUR-like auxin-responsive protein family
Zm00001d042269	-0.401201	0.00544998	DNAJ heat shock N-terminal domain-containing protein		Zm00001d020965	-0.616034	0.0355807	Proton pump-interactor 1		Zm00001d052753	-0.623163	0.000960911	NA
Zm00001d017412	1.44464	0.00546743	B-box zinc finger protein 20		Zm00001d038371	-1.22062	0.0355807	Putative laccase family protein		Zm00001d008053	-1.14407	0.000962148	NA
Zm00001d002668	-0.522482	0.00548118	root hair specific 17		Zm00001d030609	-0.370298	0.0358095	Oxysterol-binding protein-related protein 1D		Zm00001d050211	1.11037	0.000963338	Amino acid permease 2
Zm00001d005782	1.06545	0.00548939	Glutamate receptor 2.7		Zm00001d032533	-1.14768	0.0358095	NA		ZeamMp150	1.23458	0.000971148	NA
Zm00001d004899	-1.07066	0.00550022	rRNA N-glycosidase		Zm00001d000040	-0.575222	0.0359674	alpha/beta-Hydrolases superfamily protein		Zm00001d013827	-0.425158	0.000973225	TRF-like 5
Zm00001d013540	0.351654	0.00550022	E3 ubiquitin-protein ligase UPL7		Zm00001d047658	4.10352	0.0360009	nicotianamine synthase10		Zm00001d018772	1.92878	0.000973225	Pleckstrin homology (PH) domain-containing protein
Zm00001d002782	0.536563	0.00550607	FRIGIDA interacting protein 2		Zm00001d005824	-0.754559	0.0360964	Guanine nucleotide-binding protein subunit gamma 3		Zm00001d019507	-1.02149	0.000973418	Cellulose synthase-7
Zm00001d031148	1.62291	0.00551591	NA		Zm00001d045611	0.577276	0.0361066	Protein MEI2-like 5		Zm00001d033619	0.989414	0.000975284	Adenylosuccinate synthetase: chloroplastic
Zm00001d052138	0.812585	0.00551622	E3 ubiquitin-protein ligase COP1		Zm00001d037340	-1.00864	0.0361509	NA		Zm00001d012144	0.839591	0.000975284	4-coumarate--CoA ligase-like 9
Zm00001d043428	-0.343166	0.00552538	Callose synthase 11		Zm00001d043291	-0.990544	0.0363102	Purple acid phosphatase 10		Zm00001d017945	-0.444717	0.000979301	ADP-ribosylation factor-like A1A
Zm00001d009448	1.71508	0.00553185	ABC transporter B family member 9		Zm00001d014615	1.08017	0.0363434	xyloglucan endotransglycosylase homolog1		Zm00001d033897	-1.78877	0.000981171	Expressed protein; protein
Zm00001d032804	0.242112	0.00558692	Inosine triphosphate pyrophosphatase		Zm00001d047951	-0.539229	0.0363916	Senescence/dehydration-associated protein-related		Zm00001d046947	0.765887	0.000981581	Putative MYB DNA-binding domain superfamily protein
Zm00001d041993	-0.22209	0.00558692	Vacuolar protein sorting 55 (VPS55) family protein		Zm00001d042684	-0.959074	0.0364275	Protein NRT1/ PTR FAMILY 5.10		Zm00001d044663	0.308117	0.000985387	Exostosin family protein
Zm00001d025644	0.299661	0.00558697	Agmatine deiminase		Zm00001d025817	-0.280794	0.0364275	CLIP-associated protein		Zm00001d018484	-0.422225	0.000986924	Actin-related protein 2/3 complex subunit 1A
Zm00001d034072	0.558163	0.00559639	UDP-glucose 6-dehydrogenase		Zm00001d039976	-0.735228	0.0364437	NA		Zm00001d025359	0.208074	0.000986924	OTU-like cysteine protease family protein
Zm00001d049616	-0.957019	0.00559873	Glycerol-3-phosphate acyltransferase 1		Zm00001d037848	2.56677	0.0364782	Reticulon-like protein B4		Zm00001d025887	-1.21839	0.000989246	Probable metal-nicotianamine transporter YSL7
Zm00001d021244	1.0689	0.0056033	ATP-dependent DNA helicase		Zm00001d042641	-0.608731	0.0365783	RNA-binding (RRM/RBD/RNP motifs) family protein		Zm00001d017422	1.07226	0.000994196	Homeobox-leucine zipper protein ATHB-6
Zm00001d049501	-0.417411	0.005607	N-acetyltransferase		Zm00001d043702	-1.11609	0.0365783	Arabinogalactan peptide 3		Zm00001d043898	1.5094	0.000996517	NA
Zm00001d020686	1.59787	0.00561375	1-aminocyclopropane-1-carboxylate oxidase2		Zm00001d042828	1.4704	0.0369319	NA		Zm00001d049793	2.27355	0.000998135	NA
Zm00001d007800	0.558018	0.00561733	Thioredoxin		Zm00001d043598	-1.31432	0.0369319	ABC transporter G family member 29		Zm00001d028245	-1.36869	0.000998341	receptor-like protein kinase 4
Zm00001d004782	0.191331	0.00564164	Transducin/WD40 repeat-like superfamily protein		Zm00001d014614	1.07976	0.0369319	Probable xyloglucan endotransglucosylase/hydrolase protein 21		Zm00001d001694	1.19464	0.000998341	NA
Zm00001d014992	-0.56293	0.00564164	F-box domain containing protein		Zm00001d001565	1.71213	0.0369319	NA		Zm00001d045017	-0.748812	0.00100163	DUF1677 family protein
Zm00001d048314	-0.510549	0.00564164	Protein kinase 2B chloroplastic		Zm00001d017243	1.49361	0.0369319	R2R3MYB-domain protein		Zm00001d041511	-0.698135	0.00100274	Heparanase-like protein 1
Zm00001d039923	0.920632	0.00564608	PR5-like receptor kinase		Zm00001d046634	1.19202	0.0369319	NA		Zm00001d010858	0.216028	0.00100274	Cullin-1
Zm00001d021732	-1.53987	0.00564924	Cellulose synthase-like protein D3		Zm00001d048437	-1.69388	0.0369319	Calmodulin binding protein isoform 1/ Calmodulin binding protein isoform 2/ Calmodulin binding protein isoform 3/ Calmodulin binding protein isoform 4		Zm00001d014329	1.07049	0.0010032	NA
Zm00001d032442	0.247287	0.0056671	Cytochrome b5 isoform E		Zm00001d024386	-1.26412	0.0369319	xyloglucan endo-transglycosylase/hydrolase1		Zm00001d034900	0.653465	0.00100323	PGR5-like protein 1B chloroplastic
Zm00001d006420	-1.37988	0.00567033	LRR receptor-like serine/threonine-protein kinase GSO1		Zm00001d043392	0.370819	0.0369649	Plant cysteine oxidase 5		Zm00001d007130	-1.38731	0.00100323	Heavy metal transport/detoxification superfamily protein
Zm00001d006355	-0.287445	0.00569846	Protein kinase superfamily protein		Zm00001d048736	3.26296	0.0370741	S-alkyl-thiohydroximate lyase SUR1		Zm00001d029853	0.860453	0.00100568	Proline oxidase
Zm00001d026141	-1.33143	0.00569846	NA		Zm00001d004784	-0.519381	0.0371105	Protein TPLATE		Zm00001d048639	2.22523	0.00100568	Disease resistance protein RPM1
Zm00001d042187	1.99197	0.005704	Glutaredoxin-C13		Zm00001d028352	-0.302884	0.0371171	LisH and RanBPM domains containing protein		Zm00001d022581	0.516397	0.00100568	AMP deaminase
Zm00001d041390	-3.511	0.00571234	Cysteine/Histidine-rich C1 domain family protein		Zm00001d003288	-0.456965	0.0371171	Eukaryotic translation initiation factor 4B2		Zm00001d023425	-0.700182	0.00100568	Putative receptor protein kinase CRINKLY4
Zm00001d029392	0.579487	0.00571909	F-box protein		Zm00001d036370	2.09165	0.0371171	Chitinase2		Zm00001d026683	-2.06786	0.00100568	Peroxidase 12
Zm00001d022616	0.381801	0.0057351	Acyl carrier protein 2 chloroplastic		Zm00001d001165	0.85803	0.037175	NA		Zm00001d003604	-1.22953	0.00101212	Transcription factor bHLH28
Zm00001d042305	-0.641329	0.00574377	Transcription factor TCP11		Zm00001d039010	-0.864641	0.0372007	Fasciclin-like arabinogalactan protein 7		Zm00001d051294	-1.46517	0.00101312	Putative NAC domain transcription factor superfamily protein
Zm00001d015330	1.23596	0.00574377	NA		Zm00001d005790	-0.821972	0.0372028	Galactosyltransferase family protein		Zm00001d001482	-0.619427	0.00101722	NA
Zm00001d039183	0.555989	0.00574377	Protein HYPER-SENSITIVITY-RELATED 4		Zm00001d031428	-1.78153	0.0372722	Monogalactosyldiacylglycerol synthase 2 chloroplastic		Zm00001d052122	0.921525	0.00101839	NA
Zm00001d014863	1.59271	0.00574799	Protein REVEILLE 7		Zm00001d049407	-2.95854	0.0372722	Polyphenol oxidase chloroplastic		Zm00001d040071	1.19053	0.00102864	Glycosyltransferase family 61 protein
Zm00001d042975	1.00854	0.00575765	Serine carboxypeptidase-like 27		Zm00001d003306	-3.55878	0.0372722	Bowman-Birk type bran trypsin inhibitor		Zm00001d017729	-0.429724	0.00102885	Serine/threonine-protein kinase MHK
Zm00001d038530	0.560671	0.00575765	Putative inositol polyphosphate phosphatase (Synaptogenin-like) family protein		Zm00001d017584	-0.241772	0.0373215	Lysophospholipid acyltransferase 1		Zm00001d009958	-1.12016	0.00102935	NA
Zm00001d024023	-3.48223	0.00575928	Protein FLOWERING LOCUS T		Zm00001d002954	-0.765796	0.0374822	Cox19-like CHCH family protein		Zm00001d038479	-1.76213	0.00103041	NA
Zm00001d045397	-0.649096	0.0057627	U-box domain-containing protein 35		Zm00001d039097	1.17006	0.0374822	Protein STRUBBELIG-RECEPTOR FAMILY 1		Zm00001d022739	-0.857771	0.00103072	NA
Zm00001d037612	-0.750191	0.00577192	NA		Zm00001d028654	-0.539943	0.0374846	Trifunctional UDP-glucose 46-dehydratase/UDP-4-keto-6-deoxy-D-glucose 35-epimerase/UDP-4-keto-L-rhamnose-reductase RHM2		Zm00001d049265	-0.978891	0.00103072	O-methyltransferase ZRP4
Zm00001d018077	-2.43119	0.00580036	Photosynthetic NDH subunit of lumenal location 4 chloroplastic		Zm00001d042234	-0.210904	0.0374846	BTB/POZ domain-containing protein		Zm00001d002074	-3.67104	0.00103072	NA
Zm00001d012142	-0.804425	0.00580036	Acid phosphatase/vanadium-dependent haloperoxidase-related protein		Zm00001d032715	-0.772238	0.0375663	Casein kinase 1-like protein 6		Zm00001d009562	0.409898	0.00103072	Putative homeodomain-like transcription factor superfamily protein
Zm00001d038925	-1.36193	0.00580036	NA		Zm00001d043183	-0.418432	0.0377892	Probable E3 ubiquitin-protein ligase RHC1A		Zm00001d019040	-0.453678	0.00103163	D-2-hydroxyglutarate dehydrogenase mitochondrial
Zm00001d045046	0.684997	0.00580036	Pi starvation-induced transcription factor1		Zm00001d018801	-1.32525	0.0378769	NA		Zm00001d044078	2.45786	0.00103199	Little protein 1
Zm00001d033363	-0.863869	0.00580132	Zinc finger protein 1		Zm00001d038729	1.50796	0.0379223	NA		Zm00001d034872	-0.538764	0.00103367	nuclear factor Y subunit C10
ENSRNA049466642	-1.24588	0.00580132	NA		Zm00001d015435	-0.417822	0.0380726	Protein STRUBBELIG-RECEPTOR FAMILY 1		Zm00001d015032	1.91729	0.00103423	Serine/threonine-protein kinase STY46
Zm00001d029457	-0.646343	0.00580882	nucleoredoxin1		Zm00001d052731	-0.583482	0.0380988	Pyridoxal phosphate (PLP)-dependent transferases superfamily protein		Zm00001d024515	-2.12219	0.00103676	Putative cytochrome P450 superfamily protein
Zm00001d021019	0.901364	0.00580882	Transcription factor bHLH62		Zm00001d016411	0.671269	0.0381003	ADPATP carrier protein 1 chloroplastic		zma-MIR399j	-2.66109	0.00103798	NA
Zm00001d009110	1.94852	0.00580882	Pectinesterase inhibitor		Zm00001d044695	1.11748	0.0381097	Protein trichome birefringence-like 10		ENSRNA049997541	-2.66109	0.00103798	NA
Zm00001d007954	-0.46178	0.00582481	NA		Zm00001d023111	3.63378	0.0381108	NA		Zm00001d019936	0.965957	0.00104642	Heavy metal-associated domain containing protein
Zm00001d029667	0.918301	0.00583325	Membrane protein		Zm00001d005406	0.290688	0.0381221	LUC7 N_terminus domain-containing protein		Zm00001d009108	0.327524	0.00105016	RING/U-box superfamily protein
Zm00001d033216	-0.536341	0.00583325	GCK domain-containing protein		Zm00001d029620	0.747387	0.0382498	UDP-glycosyltransferase 74B1		Zm00001d050961	0.432309	0.00105061	N-acetylglucosaminyltransferase III
Zm00001d042706	0.456506	0.00583325	ARM repeat superfamily protein		Zm00001d052612	1.01921	0.0382498	Protein SMAX1-LIKE 3		Zm00001d017916	3.14628	0.00105766	CGI-like protein
Zm00001d013627	0.496172	0.00583325	DWNN domain a CCHC-type zinc finger		Zm00001d005306	0.829731	0.0382498	Dynamin-related protein 1E		Zm00001d005824	-0.807267	0.00105943	Guanine nucleotide-binding protein subunit gamma 3
Zm00001d021299	0.561125	0.00583325	Phosphatase DCR2		Zm00001d016956	0.574974	0.0382498	NA		Zm00001d033215	0.777881	0.00105974	CCAAT-HAP2-transcription factor 26
Zm00001d011830	0.41151	0.00583325	alpha/beta-Hydrolases superfamily protein		Zm00001d018847	1.96465	0.0382498	3-oxo-5-alpha-steroid 4-dehydrogenase family protein		Zm00001d016199	-0.441124	0.0010634	FAD-binding Berberine family protein
Zm00001d036955	-1.61796	0.00583325	1-aminocyclopropane-1-carboxylate oxidase1		Zm00001d011923	-0.490647	0.0382498	BTB/POZ domain-containing protein		Zm00001d029835	1.33598	0.00106591	plant/K24M7-17 protein
Zm00001d048363	-0.505413	0.00583325	Cyclin-dependent kinase inhibitor 5		Zm00001d047388	0.31198	0.0382498	magnesium transporter4		Zm00001d042932	-0.996127	0.00106591	Protein UPSTREAM OF FLC
Zm00001d005653	-0.547178	0.00583386	NA		Zm00001d001360	3.43208	0.0383507	NA		Zm00001d020003	0.237697	0.00106591	Ubiquitin-conjugating enzyme E2 variant 1C
Zm00001d004477	-0.46234	0.0058358	Serine/arginine-rich splicing factor RS31A		Zm00001d012142	-0.866083	0.0384218	Acid phosphatase/vanadium-dependent haloperoxidase-related protein		Zm00001d024671	-0.489815	0.00106591	NA
Zm00001d046923	1.79084	0.00585337	D-3-phosphoglycerate dehydrogenase 2 chloroplastic		Zm00001d014744	1.3176	0.0385914	Uncharacterised protein family (UPF0114)		Zm00001d019344	-0.483203	0.00106829	NA
Zm00001d002333	-1.22102	0.00587841	Potassium transporter 10		Zm00001d040508	-1.00153	0.0386275	Tubulin beta-2 chain		Zm00001d027700	-1.84161	0.00107063	phosphate transporter protein9
Zm00001d025851	-3.29279	0.00590137	Xyloglucan 6-xylosyltransferase 2		Zm00001d034897	-1.22927	0.0386698	Plastid-specific 30S ribosomal protein 1		Zm00001d047175	0.361573	0.00107063	NA
Zm00001d047830	-1.28964	0.00595077	kaurenoic acid oxidase2		Zm00001d049774	-2.15616	0.0386698	BTB/POZ and MATH domain-containing protein 1		Zm00001d011603	-1.37691	0.00107373	Probable purine permease 4
Zm00001d005410	2.46326	0.00597821	Aquaporin PIP2-2		Zm00001d041847	0.381279	0.0386698	Switch/sucrose nonfermenting 3C		Zm00001d017380	1.28306	0.00107707	Membrane steroid-binding protein 1
Zm00001d032495	2.9305	0.0060176	Plant invertase/pectin methylesterase inhibitor superfamily protein		Zm00001d022442	-0.746133	0.0388329	basic leucine-zipper 52		Zm00001d014894	0.295491	0.00107873	NA
Zm00001d042636	1.4589	0.0060176	Amino acid permease 6		Zm00001d045388	2.09851	0.0388403	Putative D-mannose binding lectin receptor-like protein kinase family protein		Zm00001d003381	-0.839899	0.00107907	Peroxidase 65
Zm00001d010603	0.310044	0.0060176	PRA1 family protein B4		Zm00001d033405	-0.778901	0.0388717	Pyruvate kinase		Zm00001d040411	0.254673	0.00108055	Rhomboid-like protein 20
Zm00001d040686	0.426818	0.00602174	Protein translocase subunit SECA1 chloroplastic		Zm00001d033897	-1.58847	0.0390004	Expressed protein; protein		Zm00001d048989	1.61934	0.00108707	Probable protein phosphatase 2C 30
Zm00001d030561	-0.508087	0.00602702	Bifunctional nuclease 1		Zm00001d052889	0.726932	0.0390004	IRK-interacting protein		Zm00001d028588	-1.46809	0.00109055	Fes1B
Zm00001d006034	-1.12385	0.00602702	DNA binding protein		Zm00001d002428	-0.538699	0.0390004	EF hand family protein		Zm00001d049987	1.5595	0.00109418	Probable potassium transporter 4
Zm00001d007157	-0.88217	0.00602702	NA		Zm00001d041390	3.39276	0.0390004	Cysteine/Histidine-rich C1 domain family protein		Zm00001d047921	-0.938354	0.0010972	LOB domain-containing protein 31
Zm00001d035233	-1.51849	0.00602702	NA		Zm00001d001352	-1.82345	0.0390004	NA		Zm00001d039520	1.52486	0.00109903	cytokinin oxidase1
Zm00001d035300	-1.41482	0.00602702	Heptahelical transmembrane protein 5		Zm00001d017036	-1.18255	0.0391093	Glycerophosphodiester phosphodiesterase GDPDL3		Zm00001d007206	-1.57328	0.0010993	DUF3511 domain protein
Zm00001d035846	-4.5276	0.00602702	Histidine kinase CKI1		Zm00001d034305	0.860459	0.0391122	NA		Zm00001d033664	0.305312	0.00109981	Gtk16 protein
Zm00001d036016	-0.546892	0.00603097	NA		Zm00001d028348	-2.44717	0.0393146	Peroxidase 53		Zm00001d027309	0.526421	0.00110044	Phosphoglucan phosphatase DSP4 chloroplastic
Zm00001d042313	1.06313	0.0060356	Calmodulin-binding transcription activator 4		Zm00001d019936	0.924701	0.0393146	Heavy metal-associated domain containing protein		Zm00001d038830	-0.619294	0.00110263	Putative inositol polyphosphate phosphatase (Synaptogenin-like) family protein
Zm00001d035186	-0.388687	0.0060356	Electron carrier/ iron ion binding protein		Zm00001d031639	1.317	0.0393208	ACR4		Zm00001d023273	-2.85577	0.00110263	Disease resistance protein-like
Zm00001d023939	-0.541397	0.00603839	Putative polyol transporter 1		Zm00001d018332	1.9942	0.0393328	Glutamate receptor 2.7		Zm00001d025062	-0.576765	0.00110671	Peptidyl-prolyl cis-trans isomerase 1
Zm00001d046152	2.33022	0.00604586	Putative RING zinc finger domain superfamily protein		Zm00001d036443	0.263524	0.0393328	Protein RER1B		Zm00001d051527	-0.947733	0.00111485	Putative MYB DNA-binding domain superfamily protein
Zm00001d009572	0.319913	0.00604949	Ras-related protein RABA1f		Zm00001d045159	0.384452	0.0393328	Dehydrodolichyl diphosphate synthase 6		Zm00001d004903	2.96814	0.00111908	NA
Zm00001d053969	-0.452842	0.00605557	protein dimerizations		Zm00001d026558	-0.663352	0.0393328	F-box/kelch-repeat protein		Zm00001d043515	-0.779527	0.00112122	IAA6-auxin-responsive Aux/IAA family member
Zm00001d014868	-0.586014	0.0060622	NA		Zm00001d051596	0.905017	0.0393833	NA		Zm00001d049002	1.94267	0.00112321	Putative clathrin assembly protein
Zm00001d012626	-1.10541	0.0060622	NA		Zm00001d048229	-1.72454	0.039521	Putative HLH DNA-binding domain superfamily protein		Zm00001d020714	0.788238	0.00112341	Heat shock factor protein 4
Zm00001d049540	0.307199	0.00607095	Putative NAC domain transcription factor superfamily protein		Zm00001d029149	0.663602	0.0395532	Zinc finger protein CONSTANS-LIKE 13		Zm00001d002038	-1.4757	0.0011243	anti-sigma factor antagonist domain of sulfate transporter91
Zm00001d031528	1.86632	0.00607898	exocyst subunit exo70 family protein G1		Zm00001d052225	0.308508	0.0395532	NA		Zm00001d039073	-0.64432	0.00112762	NA
Zm00001d043374	1.73254	0.00609859	Peptide transporter PTR2		Zm00001d003034	-0.389411	0.0395532	S-adenosyl-L-methionine-dependent methyltransferases superfamily protein		Zm00001d004095	1.63794	0.00113667	basic helix-loop-helix (bHLH) DNA-binding superfamily protein
Zm00001d003949	-1.09682	0.00611941	Major facilitator superfamily protein		Zm00001d018976	-0.545557	0.0395532	DNA methyl transferase8		Zm00001d038226	-1.90821	0.00113667	sugars will eventually be exported transporter1b
Zm00001d021681	-0.441716	0.00611941	NA		Zm00001d047418	1.87559	0.0395532	Cytochrome P450 709B2		Zm00001d002812	-1.01333	0.00114312	required to maintain repression 2
Zm00001d001289	1.80784	0.00611976	NA		Zm00001d000098	-0.931629	0.0395532	Probable protein phosphatase 2C 12		Zm00001d043126	0.354512	0.00114312	Ulp1 protease family C-terminal catalytic domain containing protein expressed
Zm00001d017502	0.714544	0.0061557	trehalose-6-phosphate phosphatase6		Zm00001d051360	0.747318	0.0395683	Uncharacterised conserved protein (UCP012943)		Zm00001d038997	2.25141	0.00114312	NA
Zm00001d037180	0.844447	0.00618836	Gibberellin receptor GID1L2		Zm00001d000805	1.14592	0.0395683	NA		Zm00001d030859	0.443854	0.00114613	Serine hydroxymethyltransferase
ENSRNA049458812	-0.991774	0.00619423	NA		Zm00001d008512	-0.985395	0.0396018	ABC-2 type transporter family protein		Zm00001d034836	-0.773356	0.00115627	Wiscott-Aldrich syndrome: C-terminal
Zm00001d039085	-1.18338	0.00621353	ARM repeat superfamily protein		Zm00001d031058	-0.365332	0.0396623	Receptor homology region transmembrane domain- and RING domain-containing protein 2		Zm00001d013022	-1.50547	0.0011591	(+)-neomenthol dehydrogenase
Zm00001d034882	-0.647249	0.00621855	defective kernel2		Zm00001d022245	-1.35756	0.039708	IQ domain-containing protein IQM2		Zm00001d010178	-1.63916	0.00116065	Protein kinase superfamily protein
Zm00001d043013	2.18362	0.00622349	NAD(P)-binding Rossmann-fold superfamily protein		Zm00001d031893	1.56124	0.0397674	hydroxycinnamoyltransferase12		Zm00001d048301	-1.27733	0.0011655	E3 ubiquitin ligase BIG BROTHER
Zm00001d049371	-0.382027	0.00625794	SKP1-like protein 21		Zm00001d019454	1.90658	0.0397864	PGR5-like protein 1B chloroplastic		Zm00001d014649	1.08487	0.00116661	Disease resistance protein RPM1
Zm00001d029371	0.709603	0.00627703	Probable trehalose-phosphate phosphatase J		Zm00001d020638	1.11892	0.0398029	Protein GAMETE EXPRESSED 1		Zm00001d051193	-0.691292	0.00116929	Probable metal-nicotianamine transporter YSL7
Zm00001d051854	0.574285	0.00627703	Putative integral membrane protein conserved region (DUF2404)		Zm00001d047276	-0.935287	0.0398029	brittle stalk2		Zm00001d022247	-0.867762	0.0011703	calcium ion binding
Zm00001d012596	-0.728539	0.0062798	NA		Zm00001d025707	-0.503817	0.0398029	BTB/POZ and TAZ domain-containing protein 2		Zm00001d049494	1.34442	0.0011707	sigma factor 1B
Zm00001d001964	1.9405	0.00628474	SAUR-like auxin-responsive protein family		Zm00001d001906	-1.36975	0.0398604	EH domain-containing protein 1		Zm00001d010855	0.5223	0.00117847	Stress protein/ Stress-related protein
Zm00001d028929	-0.869107	0.00632264	NA		Zm00001d044208	1.17108	0.0399469	P-loop containing nucleoside triphosphate hydrolases superfamily protein		Zm00001d021069	-0.944081	0.00117851	NA
Zm00001d024425	0.631818	0.00632264	Regulator of Vps4 activity in the MVB pathway protein		Zm00001d019035	-3.14194	0.0399872	Thioredoxin		Zm00001d036949	0.24677	0.0011792	Serine/threonine-protein phosphatase PP2A-5 catalytic subunit
Zm00001d004015	1.31077	0.00632485	NA		Zm00001d026483	-0.230338	0.0400258	NADPH--cytochrome P450 reductase		Zm00001d006329	0.347215	0.00118147	Hydrophobic protein RCI2B
Zm00001d012982	0.871425	0.00633237	NAD(P)-binding Rossmann-fold superfamily protein		Zm00001d041392	-0.365311	0.0400264	calcineurin B-like2		Zm00001d051597	1.58059	0.00118404	NA
Zm00001d015415	0.302171	0.00633237	Transcription initiation factor TFIID subunit 7		Zm00001d024745	1.2046	0.0400264	Peroxidase 64		Zm00001d007904	0.28493	0.00118602	Ubiquitin carboxyl-terminal hydrolase 13
Zm00001d008866	0.943002	0.00633237	NA		Zm00001d020773	-0.644108	0.0400817	FIP1		Zm00001d043509	-1.70344	0.00119251	Pectinesterase
Zm00001d011901	-0.722995	0.00634963	Tetratricopeptide repeat (TPR)-like superfamily protein		Zm00001d017987	-0.968391	0.0401029	Microtubule-associated protein TORTIFOLIA1		Zm00001d001571	0.174833	0.00119251	NA
Zm00001d032424	-0.56264	0.0063797	Probable sodium/metabolite cotransporter BASS1 chloroplastic		Zm00001d040247	3.46646	0.0401148	Putative expansin-A17		Zm00001d044266	0.26126	0.0011955	ATP-dependent zinc metalloprotease FTSH 4 mitochondrial
Zm00001d024855	0.189531	0.0063847	Cullin-1		Zm00001d018738	2.41826	0.0401148	pathogenesis related protein4		Zm00001d033464	3.44747	0.0011965	Putative auxin-induced protein family/ SAUR14-auxin-responsive SAUR family member
Zm00001d021139	1.08108	0.00639116	Calcium-dependent protein kinase 24		Zm00001d026282	-1.68456	0.0401749	Bifunctional inhibitor/lipid-transfer protein/seed storage 2S albumin superfamily protein		Zm00001d034415	-1.54438	0.00119913	Bifunctional inhibitor/lipid-transfer protein/seed storage 2S albumin superfamily protein
Zm00001d032379	-0.627223	0.0064057	Lipid phosphate phosphatase 2		Zm00001d034400	0.280233	0.040247	BTB/POZ and MATH domain-containing protein 4		Zm00001d003022	1.63129	0.00119913	RmlC-like cupins superfamily protein
Zm00001d033393	-0.599973	0.0064057	NA		Zm00001d010178	-1.56179	0.040247	Protein kinase superfamily protein		Zm00001d020505	-1.1575	0.00120585	DNA glycosylase superfamily protein
Zm00001d013555	-1.28169	0.0064057	Growth-regulating factor 2		Zm00001d046145	2.02848	0.040247	Putative RING zinc finger domain superfamily protein		Zm00001d035322	-1.46826	0.00120585	Expressed protein; protein
Zm00001d036387	-0.325574	0.0064057	plant/F20M13-60 protein		Zm00001d048111	-0.552214	0.040247	Plant calmodulin-binding protein-related		Zm00001d011881	-0.61306	0.00120606	Scarecrow-like protein 3
Zm00001d016216	-0.921443	0.0064161	NA		Zm00001d042340	0.31073	0.0405704	Transcription and mRNA export factor SUS1		Zm00001d045036	-1.70129	0.00120774	Chaperone DnaJ-domain superfamily protein
Zm00001d029074	-0.597254	0.00643359	Uroporphyrinogen decarboxylase 2 chloroplastic		Zm00001d031275	-1.14923	0.0406939	DNA glycosylase superfamily protein		Zm00001d002326	0.618888	0.00120784	adenosylmethionine aminotransferase1
Zm00001d015077	2.47029	0.00646186	Subtilisin inhibitor 1		Zm00001d049446	-1.89136	0.0406939	NA		Zm00001d042963	1.0539	0.00121329	NA
Zm00001d018560	0.393699	0.00647512	Callose synthase 3		Zm00001d050283	1.5607	0.0406939	Sulfate transporter 1.2		Zm00001d048484	0.977773	0.00121904	NA
Zm00001d025450	-0.396275	0.0064822	Zinc finger CCCH domain-containing protein 28		Zm00001d053704	0.61916	0.0406939	Putative RING zinc finger domain superfamily protein		Zm00001d012544	0.915202	0.00122147	myb domain protein 81
Zm00001d018527	0.349728	0.00648572	sucrose transporter2		Zm00001d045185	1.46526	0.0406939	NA		Zm00001d006342	0.495664	0.00123357	Mo-molybdopterin cofactor sulfurase
Zm00001d024251	-0.343202	0.00648572	Transcription factor GTE7		Zm00001d038753	0.477813	0.0408068	Ubiquitin domain-containing protein		Zm00001d036073	0.31676	0.00124752	Hypersensitive-induced reaction protein 4
Zm00001d045396	-0.888114	0.0064961	NA		Zm00001d028119	-0.58506	0.0408078	NA		Zm00001d017990	1.72279	0.00125098	NA
Zm00001d048508	-1.38569	0.00649806	OJ000126_13.10 protein; protein		Zm00001d004706	0.469918	0.0408078	Lipase-like PAD4		Zm00001d023717	2.6714	0.00125663	Zinc finger BED domain-containing protein DAYSLEEPER
Zm00001d000060	1.97295	0.00651933	NAD(P)-linked oxidoreductase superfamily protein		Zm00001d041186	-0.247855	0.0408078	Protein kinase family protein		Zm00001d029075	-1.90622	0.00126461	CBL-interacting serine/threonine-protein kinase 10
Zm00001d045479	-0.443647	0.00651949	1-aminocyclopropane-1-carboxylate synthase3		Zm00001d042774	0.40875	0.0408078	F-box/LRR-repeat protein		Zm00001d012736	0.889138	0.00126461	NA
Zm00001d020019	-0.609205	0.00652127	Protein PHR1-LIKE 3		Zm00001d012677	-0.444172	0.0408078	Glycerophosphodiester phosphodiesterase GDPD5		Zm00001d014696	-0.29167	0.00128188	3-phosphoinositide-dependent protein kinase-1
Zm00001d036789	0.48856	0.00652127	RNA-binding (RRM/RBD/RNP motifs) family protein		Zm00001d000230	-1.03343	0.0408078	Protease Do-like 5 chloroplastic		Zm00001d012728	0.373541	0.00128207	Putative DUF1421 domain family protein
Zm00001d018195	-0.969296	0.00652327	WAT1-related protein		Zm00001d027338	-0.724953	0.0408516	NA		Zm00001d024694	2.72195	0.00128306	receptor like protein 7
Zm00001d039539	-0.804282	0.00655045	NA		Zm00001d035596	3.29122	0.0408516	Anaphase-promoting complex subunit 4		Zm00001d041277	1.37232	0.00128358	Putative axial regulator YABBY 2
Zm00001d029442	-0.836809	0.00656485	F-box only protein 13		Zm00001d039167	0.477377	0.0408516	ATP-dependent Clp protease proteolytic subunit		Zm00001d017189	-3.47131	0.00128381	Carboxypeptidase SOL1
Zm00001d047868	-0.452665	0.0065668	Late embryogenesis abundant (LEA) hydroxyproline-rich glycoprotein family		Zm00001d028576	-0.841803	0.040895	fringe-related protein		Zm00001d009849	0.22165	0.0012926	NifU-like protein 4 mitochondrial
Zm00001d038536	0.481748	0.00657229	Endoplasmic reticulum vesicle transporter protein		Zm00001d053412	1.08518	0.040911	RHOMBOID-like protein 9 chloroplastic		Zm00001d005406	0.296427	0.00129276	LUC7 N_terminus domain-containing protein
Zm00001d025541	-0.904364	0.00658594	Eukaryotic aspartyl protease family protein		Zm00001d012237	0.637334	0.0409111	SnRK1-interacting protein 1		Zm00001d003052	-1.72546	0.00129289	NAC domain-containing protein 21/22
Zm00001d049762	-0.696565	0.00661223	NA		Zm00001d002856	1.10024	0.0409191	E3 ubiquitin-protein ligase RMA1		Zm00001d039272	0.607317	0.00129721	WPP domain-interacting tail-anchored protein 1
Zm00001d033511	-0.355198	0.00662215	Glycine-rich RNA-binding protein RZ1C		Zm00001d034047	2.43184	0.0409375	Zea mays MADS24		Zm00001d018341	-0.310986	0.00129929	Serine/arginine-rich splicing factor RSZ22
Zm00001d013007	0.413493	0.00662215	ADP-ribosylation factor homolog1		Zm00001d003935	-0.341042	0.0409375	NA		Zm00001d004232	-1.14697	0.001306	NA
Zm00001d032501	-1.10516	0.00662883	Endonuclease 1		Zm00001d035178	2.64991	0.0409375	Cytochrome P450 71A26		Zm00001d014968	-0.318511	0.00131169	Alg9-like mannosyltransferase family
Zm00001d051900	-0.377317	0.00662883	Protein kinase superfamily protein		Zm00001d025831	1.1327	0.0409375	ammonium transporter1		Zm00001d042111	-1.3642	0.00131958	tassels replace upper ears1
Zm00001d018671	2.53507	0.00663395	NA		Zm00001d017466	-1.64521	0.0410236	Ethylene-responsive transcription factor ERF105		Zm00001d013900	2.08674	0.00132697	Expressed protein; protein
Zm00001d043335	0.333747	0.00663714	Branched-chain-amino-acid aminotransferase 5 chloroplastic		Zm00001d002287	-1.53132	0.0410671	LRR receptor-like serine/threonine-protein kinase FLS2		Zm00001d026585	-0.381185	0.00132697	Trypsin family protein
Zm00001d053641	-0.34711	0.00663985	NA		Zm00001d029664	-0.4382	0.0411406	Shaggy-related protein kinase theta		Zm00001d032867	0.572943	0.00133059	Phosphoglycerate kinase
Zm00001d053612	0.749676	0.00664643	ABC transporter G family member 40		Zm00001d003176	0.52758	0.0411406	Protein NLP8		Zm00001d044197	-0.672738	0.00133091	protein; Pentatricopeptide (PPR) repeat-containing protein-like
Zm00001d043929	0.543435	0.00665086	Fasciclin-like arabinogalactan protein 6		Zm00001d006673	1.08722	0.0411406	Major facilitator superfamily protein		Zm00001d013958	0.755919	0.0013447	NA
Zm00001d046728	-1.14418	0.00665676	VQ motif family protein		Zm00001d019406	-3.11217	0.0411406	Acidic endochitinase		Zm00001d031634	0.834488	0.0013451	Major facilitator superfamily protein
Zm00001d006585	1.12226	0.00665977	R2R3MYB-domain protein		Zm00001d011037	0.475842	0.0411406	MAP kinase phosphatase isoform 1/ MAP kinase phosphatase isoform 2		Zm00001d018712	1.7177	0.00134664	NA
Zm00001d046281	0.929445	0.00665977	NA		Zm00001d009296	3.21527	0.0411606	Pathogenesis-related protein PRMS		Zm00001d032107	-2.2372	0.00134705	4-coumarate--CoA ligase-like 7
Zm00001d047567	-2.3548	0.00666856	embryonic cell protein 63		Zm00001d052137	-1.27491	0.0411744	Probable tyrosine-protein phosphatase		Zm00001d021932	-0.550902	0.00134719	Protein indeterminate-domain 11
Zm00001d039302	1.40592	0.00668464	Transducin/WD40 repeat-like superfamily protein		Zm00001d053900	0.350955	0.0411963	Bifunctional protein FolD 4 chloroplastic		Zm00001d038882	-1.45116	0.00134837	Putative regulator of chromosome condensation (RCC1) family protein
Zm00001d047043	-0.50978	0.00668464	Chaperone DnaJ-domain superfamily protein		Zm00001d002817	-0.907357	0.0412357	Kinesin-like protein KIN-7G		Zm00001d043694	-0.407135	0.00135191	Probable magnesium transporter NIPA9
Zm00001d025752	0.750698	0.00668464	Transcription factor bHLH68		Zm00001d013747	-0.483644	0.0412472	Presenilin		Zm00001d024749	1.46198	0.00135404	Peroxidase
Zm00001d013496	-0.275434	0.00668541	Alkaline phytoceramidase (aPHC)		Zm00001d031430	-0.807814	0.0414171	NA		Zm00001d052483	1.21377	0.00135641	Disease resistance protein RPM1
Zm00001d028625	-0.67634	0.00670544	DOF30 transcription factor		Zm00001d045621	0.710692	0.0414911	BTB/POZ domain-containing protein		Zm00001d042596	0.619632	0.00135641	alpha/beta-Hydrolases superfamily protein
Zm00001d030207	-0.464445	0.00670544	Pentatricopeptide repeat-containing protein		Zm00001d042349	0.950206	0.0415837	Whole genome shotgun sequence of line PN40024 scaffold_35.assembly12x (Fragment)		Zm00001d001110	-0.793365	0.00135641	NA
Zm00001d025508	-1.7186	0.00670544	Class IV heat shock protein		Zm00001d042721	-0.514931	0.0415837	G-box-binding factor 4		Zm00001d009928	-1.05363	0.00136023	Mog1/PsbP/DUF1795-like photosystem II reaction center PsbP family protein
Zm00001d029303	-0.338776	0.00673975	CONTAINS InterPro DOMAIN/s: Hepatocellular carcinoma-associated antigen 59 (InterPro:IPR010756); Has 1239 Blast hits to 998 proteins in 204 species: Archae - 4; Bacteria - 71; Metazoa - 421; Fungi - 109; Plants - 87; Viruses - 5; Other Eukaryotes - /.../ource: NCBI BLink).		Zm00001d017274	-0.675118	0.0417911	Phenylalanine ammonia-lyase		Zm00001d036771	-2.11748	0.00136101	Protein kinase superfamily protein
Zm00001d035436	-0.634396	0.00676138	Mediator of RNA polymerase II transcription subunit 11		Zm00001d037973	1.68219	0.0417911	Serine/threonine-protein kinase		Zm00001d003382	-0.368438	0.00136116	Sterile alpha motif (SAM) domain-containing protein
Zm00001d027861	-0.545196	0.00679075	Alanine--glyoxylate aminotransferase 2 homolog 1 mitochondrial		Zm00001d026200	1.39194	0.0417911	S-norcoclaurine synthase		Zm00001d029555	0.416467	0.00136201	Ubiquitin-fusion protein
Zm00001d028572	0.484929	0.00679075	Mannose-1-phosphate guanylyltransferase 1		Zm00001d027987	-1.33527	0.0418138	Transcription factor bHLH99		Zm00001d047849	-0.441342	0.00136201	Sulfoquinovosyl transferase SQD2
Zm00001d002632	0.569949	0.00679221	RHOMBOID-like protein 3		Zm00001d018077	2.38778	0.0418216	Photosynthetic NDH subunit of lumenal location 4 chloroplastic		Zm00001d020202	1.1387	0.00136643	NA
Zm00001d038346	0.587286	0.00679221	NA		Zm00001d053843	-2.19212	0.0418373	Wound induced protein		Zm00001d002537	-0.447259	0.0013722	Protein MULTIPLE CHLOROPLAST DIVISION SITE 1
Zm00001d029066	0.867502	0.0067983	PAP/OAS1 substrate-binding domain superfamily		Zm00001d011228	0.729951	0.0418376	Putative calmodulin-binding family protein		Zm00001d009401	0.267957	0.00137979	DNAJ heat shock N-terminal domain-containing protein
Zm00001d034063	-0.328313	0.0067983	Expressed protein; Expressed protein (Having alternative splicing); protein		Zm00001d009024	-0.416809	0.0418461	NA		Zm00001d040789	0.215286	0.00137998	RING/U-box superfamily protein
[truncated: 29,943 more rows]

## Sheet: substrate
Sand vs Loam
gene_id	LFC	padj	description
[truncated: 4,810 more rows]

## Sheet: genotype
rth3 vs WT
gene_id	LFC	padj	description
[truncated: 136 more rows]

## Sheet: stage_substrate
BBCH14 Sand vs Loam					BBCH19 Sand vs Loam					BBCH59 Sand vs Loam
[truncated: 32,415 more rows]

[truncated: 1 more sheets: stage_substrate_genotype]
