# Supplementary material for: Plant Age and Soil Texture Rather Than the Presence of Root Hairs Cause Differences in Maize Resource Allocation and Root Gene Expression in the Field
Source: Plants (Basel). 2022 Oct 28;11(21):2883. doi: 10.3390/plants11212883 (PMC9657941; doi:10.3390/plants11212883)
Supplement: Supplementary file 1 [file plants-11-02883-s001.zip › Table S6.xlsx]

## Sheet: Sheet1
Plant age and soil texture rather than the presence of root hairs cause differences in maize resource allocation and root gene expression in the field
Plants
Minh Ganther, Eva Lippold, Manuela Désirée Bienert, Marie-Lara Bouffaud, Mario Bauer, Louis Baumann, Gerd Patrick Bienert, Doris Vetterlein, Anna Heintz-Buschart, Mika Tapio Tarkka*
*Corresponding Author: mika.tarkka@ufz.de (Helmholtz-Institute for Environmental Research - UFZ, Halle, Germany)
Table S6. Enriched GO terms for differentially expressed genes by stage and substrate.
Differential expression was determined by the DESeq package (Wald test). Only genes with corrected p-value padj<0.05 and a |LFC|>1 were included in the analysis by GOseq.
Sheet names are contrasts that describe the comparison of interest: Conditon1 vs Condition2 (baseline).
LFC: log2 fold change
BP, CC, MF: biological process, cellular component, molecular function (GO descriptors)
hitsPerc: Hits in % (number of differentially expressed genes per total number of genes in that GO category)

## Sheet: stage_19vs14
BBCH19 vs BBCH14
up-regulated DEG						down-regulated DEG
category	term	ontology	padj	hitsPerc		category	term	ontology	padj	hitsPerc
GO:0004867	serine-type endopeptidase inhibitor activity	MF	4.02125e-10	0.371429		GO:0006817	phosphate ion transport	BP	5.3818e-05	0.444444
GO:0010951	negative regulation of endopeptidase activity	BP	5.5712e-10	0.329268		GO:0030643	cellular phosphate ion homeostasis	BP	0.00295483	0.555556
GO:0009611	response to wounding	BP	5.5712e-10	0.109705		GO:0080040	positive regulation of cellular response to phosphate starvation	BP	0.00439646	0.714286
GO:0005506	iron ion binding	MF	4.24935e-09	0.117172		GO:0046475	glycerophospholipid catabolic process	BP	0.0144368	1
GO:0010282	senescence-associated vacuole	CC	3.85137e-06	0.666667		GO:0047395	glycerophosphoinositol glycerophosphodiesterase activity	MF	0.0144368	1
GO:0005576	extracellular region	CC	1.42016e-05	0.0823224		GO:0044699	NA	NA	0.0239632	0.259259
GO:0009055	electron transfer activity	MF	2.18193e-05	0.105461		GO:0016036	cellular response to phosphate starvation	BP	0.0308524	0.0807175
GO:0044237	cellular metabolic process	BP	2.53251e-05	0.0690148		GO:0070417	cellular response to cold	BP	0.0308524	0.21875
GO:0050832	defense response to fungus	BP	6.11379e-05	0.0918728		GO:0010345	suberin biosynthetic process	BP	0.0308524	0.25
GO:0044281	small molecule metabolic process	BP	9.00945e-05	0.0862069		GO:0016021	integral component of membrane	CC	0.0308524	0.035268
GO:0006032	chitin catabolic process	BP	0.000129552	0.325581		GO:0009561	megagametogenesis	BP	0.0437518	0.145833
GO:0055114	oxidation-reduction process	BP	0.000139246	0.0625
GO:0009817	defense response to fungus, incompatible interaction	BP	0.000139246	0.193548
GO:0048046	apoplast	CC	0.000238954	0.0812183
GO:0008061	chitin binding	MF	0.000485313	0.245902
GO:0051704	multi-organism process	BP	0.000664934	0.0626733
GO:0010076	maintenance of floral meristem identity	BP	0.000702671	0.291667
GO:0020037	heme binding	MF	0.00122469	0.0923623
GO:0007568	aging	BP	0.00181256	0.206349
GO:0047461	(+)-delta-cadinene synthase activity	MF	0.0024063	0.333333
GO:0016709	oxidoreductase activity, acting on paired donors, with incorporation or reduction of molecular oxygen, NAD(P)H as one donor, and incorporation of one atom of oxygen	MF	0.00256549	0.176471
GO:0050589	leucocyanidin oxygenase activity	MF	0.00273459	0.555556
GO:0010077	maintenance of inflorescence meristem identity	BP	0.00286753	0.241379
GO:0005615	extracellular space	CC	0.00286753	0.129032
GO:0004497	monooxygenase activity	MF	0.00286753	0.138365
GO:0051555	flavonol biosynthetic process	BP	0.00286753	0.229167
GO:0005764	lysosome	CC	0.00362877	0.168675
GO:0071840	cellular component organization or biogenesis	BP	0.00389742	0.183099
GO:0050896	response to stimulus	BP	0.00537935	0.0583272
GO:0006508	proteolysis	BP	0.00679523	0.0691099
GO:0010154	fruit development	BP	0.00909275	0.176471
GO:0009699	phenylpropanoid biosynthetic process	BP	0.00909275	0.120773
GO:0016998	cell wall macromolecule catabolic process	BP	0.010681	0.22
GO:0000272	polysaccharide catabolic process	BP	0.0133637	0.141509
GO:0004568	chitinase activity	MF	0.0147003	0.263158
GO:0045431	flavonol synthase activity	MF	0.0173063	0.242424
GO:0010106	cellular response to iron ion starvation	BP	0.0213676	0.125
GO:0016174	NAD(P)H oxidase (H(2)O(2)-forming activity	MF	0.0239041	0.307692
GO:0010120	camalexin biosynthetic process	BP	0.0244892	0.35
GO:0022892	NA	NA	0.0252101	0.173077
GO:0005887	integral component of plasma membrane	CC	0.0259773	0.0884615
GO:0004185	serine-type carboxypeptidase activity	MF	0.0283086	0.155172
GO:0016114	terpenoid biosynthetic process	BP	0.0283086	0.175439
GO:0000977	RNA polymerase II transcription regulatory region sequence-specific DNA binding	MF	0.0300538	0.118644
GO:0005242	inward rectifier potassium channel activity	MF	0.0490105	0.25

## Sheet: stage_59vs19
BBCH59 vs BBCH19
up-regulated DEG						down-regulated DEG
category	term	ontology	padj	hitsPerc		category	term	ontology	padj	hitsPerc
GO:0050162	oxalate oxidase activity	MF	2.06382e-18	0.7		GO:0005576	extracellular region	CC	4.99158e-08	0.0848329
GO:0031012	extracellular matrix	CC	1.30749e-17	0.5		GO:0042542	response to hydrogen peroxide	BP	9.85636e-08	0.12709
GO:0033609	oxalate metabolic process	BP	1.30749e-17	0.547619		GO:0009644	response to high light intensity	BP	1.72358e-06	0.121406
GO:0045735	nutrient reservoir activity	MF	6.71318e-14	0.363636		GO:0010282	senescence-associated vacuole	CC	1.72358e-06	0.666667
GO:0030145	manganese ion binding	MF	2.53892e-12	0.27381		GO:0030599	pectinesterase activity	MF	4.41196e-05	0.246575
GO:0006826	iron ion transport	BP	7.6329e-07	0.151079		GO:0034976	response to endoplasmic reticulum stress	BP	6.31882e-05	0.10989
GO:0009651	response to salt stress	BP	4.84723e-05	0.0540098		GO:0048046	apoplast	CC	6.31882e-05	0.0790464
GO:0010106	focal adhesion assembly	BP	0.000223629	0.130769		GO:0045471	response to ethanol	BP	6.90986e-05	0.777778
GO:0005887	integral component of plasma membrane	CC	0.000297256	0.0877863		GO:0010286	heat acclimation	BP	0.00010044	0.158621
GO:0030410	nicotianamine synthase activity	MF	0.000366444	0.6		GO:0046185	aldehyde catabolic process	BP	0.000155919	0.8
GO:0030418	nicotianamine biosynthetic process	BP	0.000366444	0.6		GO:0071771	aldehyde decarbonylase activity	MF	0.000155919	0.8
GO:0015706	nitrate transport	BP	0.000404726	0.094697		GO:0005618	cell wall	CC	0.000155919	0.0769231
GO:0020037	heme binding	MF	0.000966193	0.0721831		GO:0006457	protein folding	BP	0.000172877	0.0840517
GO:0048046	apoplast	CC	0.00117078	0.0602258		GO:0009505	plant-type cell wall	CC	0.000395167	0.0811639
GO:0055114	oxidation-reduction process	BP	0.00299952	0.0440382		GO:0020037	heme binding	MF	0.000405031	0.0897887
GO:0072330	monocarboxylic acid biosynthetic process	BP	0.00366306	0.625		GO:0009817	defense response to fungus, incompatible interaction	BP	0.000687954	0.172043
GO:0010167	response to nitrate	BP	0.00369683	0.0862745		GO:0007568	aging	BP	0.000728343	0.206349
GO:0044281	small molecule metabolic process	BP	0.00369683	0.0601852		GO:0005506	iron ion binding	MF	0.000900556	0.0851485
GO:0009705	plant-type vacuole membrane	CC	0.00474808	0.0892857		GO:0045490	pectin catabolic process	BP	0.0012081	0.213115
GO:0052716	hydroquinone:oxygen oxidoreductase activity	MF	0.00821751	0.225806		GO:0043086	negative regulation of catalytic activity	BP	0.00186228	0.129944
GO:0044550	secondary metabolite biosynthetic process	BP	0.0128724	0.150685		GO:0055114	oxidation-reduction process	BP	0.00269921	0.055671
GO:0003700	DNA-binding transcription factor activity	MF	0.0163264	0.0498054		GO:0046910	pectinesterase inhibitor activity	MF	0.00481421	0.310345
GO:0002764	immune response-regulating signaling pathway	BP	0.0172531	0.238095		GO:0051259	protein complex oligomerization	BP	0.00481421	0.368421
GO:0010076	maintenance of floral meristem identity	BP	0.0172531	0.2		GO:0045330	aspartyl esterase activity	MF	0.0058218	0.25
GO:0006952	defense response	BP	0.0172531	0.0600316		GO:0050832	defense response to fungus	BP	0.00674334	0.0750436
GO:0048041	focal adhesion assembly	BP	0.0198175	0.285714		GO:0019751	polyol metabolic process	BP	0.011219	1
GO:0046274	lignin catabolic process	BP	0.0211177	0.184211		GO:0016042	lipid catabolic process	BP	0.021106	0.109827
GO:0007178	transmembrane receptor protein serine/threonine kinase signaling pathway	BP	0.0241974	0.16		GO:0043668	exine	CC	0.0214278	0.444444
GO:0010260	animal organ senescence	BP	0.0241974	0.0862069		GO:0005615	extracellular space	CC	0.0232845	0.109948
GO:0000977	RNA polymerase II transcription regulatory region sequence-specific DNA binding	MF	0.0253775	0.097561		GO:0008234	cysteine-type peptidase activity	MF	0.0262876	0.126214
GO:0010204	NA	NA	0.0260117	0.171429		GO:0010143	cutin biosynthetic process	BP	0.0370029	0.190476
GO:0044237	cellular metabolic process	BP	0.0284922	0.0442478
GO:0006833	water transport	BP	0.0290905	0.0746888
GO:0047461	(+)-delta-cadinene synthase activity	MF	0.0368761	0.238095
GO:0010077	maintenance of inflorescence meristem identity	BP	0.0373477	0.172414
GO:0015200	methylammonium transmembrane transporter activity	MF	0.0373477	0.5
GO:0072489	methylammonium transmembrane transport	BP	0.0373477	0.5
GO:0032940	secretion by cell	BP	0.040785	0.107527
GO:0042807	central vacuole	CC	0.0448517	0.333333
GO:0009674	potassium:sodium symporter activity	MF	0.0451323	0.375

## Sheet: stage_59vs14
BBCH59 vs BBCH14
up-regulated DEG						down-regulated DEG
category	term	ontology	padj	hitsPerc		category	term	ontology	padj	hitsPerc
GO:0033609	oxalate metabolic process	BP	6.12606e-21	0.717949		GO:0009644	response to high light intensity	BP	1.08253e-06	0.160256
GO:0050162	oxalate oxidase activity	MF	2.34906e-20	0.827586		GO:0042542	response to hydrogen peroxide	BP	2.56691e-06	0.151007
GO:0045735	nutrient reservoir activity	MF	8.19221e-18	0.5		GO:0016036	cellular response to phosphate starvation	BP	3.26499e-06	0.152466
GO:0031012	extracellular matrix	CC	8.31709e-17	0.577778		GO:0016021	integral component of membrane	CC	2.34693e-05	0.062639
GO:0030145	manganese ion binding	MF	1.31298e-13	0.35		GO:0010286	heat acclimation	BP	4.97243e-05	0.206897
GO:0020037	heme binding	MF	1.66585e-10	0.129663		GO:0005576	extracellular region	CC	0.000207467	0.0996534
GO:0055114	oxidation-reduction process	BP	2.18633e-10	0.0772804		GO:0016042	lipid catabolic process	BP	0.000525748	0.166667
GO:0005506	iron ion binding	MF	2.64854e-10	0.127273		GO:0006817	phosphate ion transport	BP	0.000584764	0.444444
GO:0010951	negative regulation of endopeptidase activity	BP	2.04042e-09	0.317073		GO:0009505	plant-type cell wall	CC	0.000683026	0.107477
GO:0044281	small molecule metabolic process	BP	1.39805e-08	0.106583		GO:0045471	response to ethanol	BP	0.00129921	0.777778
GO:0006826	iron ion transport	BP	1.39805e-08	0.202899		GO:0003993	acid phosphatase activity	MF	0.00159746	0.24
GO:0048046	apoplast	CC	7.34698e-08	0.0989848		GO:0019375	galactolipid biosynthetic process	BP	0.00463694	0.139241
GO:0004867	serine-type endopeptidase inhibitor activity	MF	1.60864e-07	0.314286		GO:0030643	cellular phosphate ion homeostasis	BP	0.00774137	0.555556
GO:0009055	electron transfer activity	MF	1.28093e-06	0.114878		GO:0010103	stomatal complex morphogenesis	BP	0.011412	0.125683
GO:0000977	RNA polymerase II transcription regulatory region sequence-specific DNA binding	MF	1.28093e-06	0.186441		GO:0046506	sulfolipid biosynthetic process	BP	0.0132316	0.666667
GO:0080170	hydrogen peroxide transmembrane transport	BP	2.62182e-06	0.588235		GO:0080040	positive regulation of cellular response to phosphate starvation	BP	0.0132316	0.714286
GO:0004497	monooxygenase activity	MF	7.07567e-06	0.176101		GO:0051259	protein complex oligomerization	BP	0.0132316	0.421053
GO:0010106	cellular response to iron ion starvation	BP	7.07567e-06	0.179688		GO:0048046	apoplast	CC	0.0156533	0.0939086
GO:0009651	response to salt stress	BP	7.48051e-06	0.076796		GO:0046475	glycerophospholipid catabolic process	BP	0.018861	1
GO:0005887	integral component of plasma membrane	CC	1.17096e-05	0.123077		GO:0047395	glycerophosphoinositol glycerophosphodiesterase activity	MF	0.018861	1
GO:0047461	(+)-delta-cadinene synthase activity	MF	2.24161e-05	0.428571		GO:0006457	protein folding	BP	0.018861	0.0962801
GO:0015250	water channel activity	MF	2.75183e-05	0.363636		GO:0046688	response to copper ion	BP	0.0213643	0.310345
GO:0010076	maintenance of floral meristem identity	BP	6.00855e-05	0.333333		GO:0010075	regulation of meristem growth	BP	0.023307	0.109034
GO:0030410	nicotianamine synthase activity	MF	7.40152e-05	0.7		GO:0019751	polyol metabolic process	BP	0.0383801	1
GO:0030418	nicotianamine biosynthetic process	BP	7.40152e-05	0.7
GO:0042180	cellular ketone metabolic process	BP	9.13082e-05	0.0754098
GO:0016705	oxidoreductase activity, acting on paired donors, with incorporation or reduction of molecular oxygen	MF	0.00011862	0.143564
GO:0009674	potassium:sodium symporter activity	MF	0.000190782	0.625
GO:0044550	secondary metabolite biosynthetic process	BP	0.00020844	0.225352
GO:0000165	MAPK cascade	BP	0.000277882	0.0931818
GO:0010077	maintenance of inflorescence meristem identity	BP	0.000383485	0.275862
GO:0015837	amine transport	BP	0.000421608	0.191781
GO:0072330	monocarboxylic acid biosynthetic process	BP	0.00050679	0.75
GO:0071805	potassium ion transmembrane transport	BP	0.000508101	0.153153
GO:0010167	response to nitrate	BP	0.000508101	0.119522
GO:0015706	nitrate transport	BP	0.00066201	0.119231
GO:0003333	amino acid transmembrane transport	BP	0.000967021	0.141667
GO:0005773	vacuole	CC	0.0010009	0.0717489
GO:0005576	extracellular region	CC	0.0010009	0.0788562
GO:0046983	protein dimerization activity	MF	0.00112033	0.0849057
GO:0022804	active transmembrane transporter activity	MF	0.00129676	0.158416
GO:0005618	cell wall	CC	0.00172925	0.0814815
GO:0045944	positive regulation of transcription by RNA polymerase II	BP	0.001979	0.105505
GO:0016114	terpenoid biosynthetic process	BP	0.001979	0.210526
GO:0034220	ion transmembrane transport	BP	0.001979	0.110577
GO:0015172	acidic amino acid transmembrane transporter activity	MF	0.00313152	0.307692
GO:0016709	oxidoreductase activity, acting on paired donors, with incorporation or reduction of molecular oxygen, NAD(P)H as one donor, and incorporation of one atom of oxygen	MF	0.00332281	0.176471
GO:0042128	nitrate assimilation	BP	0.00437373	0.189655
GO:0005275	amine transmembrane transporter activity	MF	0.00467243	0.141509
GO:0009750	response to fructose	BP	0.00931381	0.102459
GO:0015112	nitrate transmembrane transporter activity	MF	0.00991953	0.375
GO:0015175	neutral amino acid transmembrane transporter activity	MF	0.0103485	0.266667
GO:0050896	response to stimulus	BP	0.0127867	0.0605282
GO:0010582	floral meristem determinacy	BP	0.0127867	0.233333
GO:0015800	acidic amino acid transport	BP	0.0128624	0.291667
GO:0048864	stem cell development	BP	0.0145979	0.119565
GO:0008429	phosphatidylethanolamine binding	MF	0.016111	0.375
GO:0045596	negative regulation of cell differentiation	BP	0.0166743	0.11828
GO:0015804	neutral amino acid transport	BP	0.0190439	0.242424
GO:0015707	nitrite transport	BP	0.0242884	1
GO:0043090	amino acid import	BP	0.0262701	0.101852
GO:0046622	positive regulation of organ growth	BP	0.0262701	1
GO:0009705	plant-type vacuole membrane	CC	0.0262701	0.101796
GO:0006520	cellular amino acid metabolic process	BP	0.0352882	0.102679
GO:0010218	response to far red light	BP	0.0452385	0.112583
GO:0009611	response to wounding	BP	0.0483803	0.0773558
GO:0009269	response to desiccation	BP	0.0496169	0.156627

## Sheet: substrate
Sand vs Loam
up-regulated DEG (higher in sand)						down-regulated DEG (higher in loam)
category	term	ontology	padj	hitsPerc		category	term	ontology	padj	hitsPerc
GO:0005576	extracellular region	CC	1.79861e-29	0.142981		GO:0008061	chitin binding	MF	3.99017e-05	0.213115
GO:0009505	plant-type cell wall	CC	5.20618e-25	0.166667		GO:0004867	serine-type endopeptidase inhibitor activity	MF	3.99017e-05	0.214286
GO:0004601	peroxidase activity	MF	7.78773e-24	0.2891		GO:0010951	negative regulation of endopeptidase activity	BP	0.000126524	0.182927
GO:0098869	cellular oxidant detoxification	BP	3.96446e-20	0.241935		GO:0009817	defense response to fungus, incompatible interaction	BP	0.00165198	0.129032
GO:0042744	hydrogen peroxide catabolic process	BP	3.6946e-19	0.229249		GO:0004568	chitinase activity	MF	0.00250196	0.236842
GO:0009664	plant-type cell wall organization	BP	4.00849e-16	0.200717		GO:0009744	response to sucrose	BP	0.00358627	0.0617284
GO:0009969	xyloglucan biosynthetic process	BP	1.59551e-15	0.490909		GO:0009538	photosystem I reaction center	CC	0.0134167	0.454545
GO:0020037	heme binding	MF	7.83408e-15	0.152753		GO:0048448	stamen morphogenesis	BP	0.0149371	0.4
GO:0009628	response to abiotic stimulus	BP	8.91036e-15	0.227488		GO:0050832	defense response to fungus	BP	0.0365848	0.0459364
GO:0048646	anatomical structure formation involved in morphogenesis	BP	8.38982e-10	0.0842246		GO:0080027	response to herbivore	BP	0.0365848	0.5
GO:0009826	unidimensional cell growth	BP	4.24598e-09	0.188571		GO:0006032	chitin catabolic process	BP	0.0366923	0.186047
GO:0032580	Golgi cisterna membrane	CC	1.83463e-08	0.367347		GO:0005576	extracellular region	CC	0.0416484	0.0389948
GO:0071555	cell wall organization	BP	5.65786e-08	0.107724
GO:0055114	oxidation-reduction process	BP	8.52662e-08	0.0760135
GO:0042353	fucose biosynthetic process	BP	9.81112e-08	0.833333
GO:0048226	Casparian strip	CC	3.7274e-06	0.55
GO:0007043	cell-cell junction assembly	BP	4.01979e-05	0.875
GO:0070301	cellular response to hydrogen peroxide	BP	4.13883e-05	0.154286
GO:0006979	response to oxidative stress	BP	7.00912e-05	0.1133
GO:0010256	endomembrane system organization	BP	9.74681e-05	0.44
GO:0006826	iron ion transport	BP	0.000339462	0.15942
GO:0009506	plasmodesma	CC	0.000629336	0.0659679
GO:0016757	transferase activity, transferring glycosyl groups	MF	0.000735738	0.106164
GO:0008107	galactoside 2-alpha-L-fucosyltransferase activity	MF	0.000787857	0.375
GO:0050224	prunasin beta-glucosidase activity	MF	0.000859572	0.454545
GO:0005618	cell wall	CC	0.000859572	0.0876543
GO:0030173	integral component of Golgi membrane	CC	0.0010212	0.226415
GO:0036065	fucosylation	BP	0.00105369	0.36
GO:0048443	stamen development	BP	0.00105369	0.152174
GO:0000911	cytokinesis by cell plate formation	BP	0.00124825	0.0869565
GO:0061024	membrane organization	BP	0.00143505	0.23913
GO:0047668	amygdalin beta-glucosidase activity	MF	0.00144451	0.333333
GO:0046872	metal ion binding	MF	0.00216095	0.0743494
GO:0030410	nicotianamine synthase activity	MF	0.00243952	0.6
GO:0030418	nicotianamine biosynthetic process	BP	0.00243952	0.6
GO:0004714	transmembrane receptor protein tyrosine kinase activity	MF	0.00276271	0.193548
GO:0010345	suberin biosynthetic process	BP	0.00335037	0.321429
GO:0048767	root hair elongation	BP	0.00405322	0.0961538
GO:0047172	shikimate O-hydroxycinnamoyltransferase activity	MF	0.00416701	0.368421
GO:0005199	structural constituent of cell wall	MF	0.0043482	0.25
GO:0033843	xyloglucan 6-xylosyltransferase activity	MF	0.00452447	0.5
GO:0047205	quinate O-hydroxycinnamoyltransferase activity	MF	0.00554195	0.368421
GO:0006486	protein glycosylation	BP	0.00651534	0.0912698
GO:0005871	kinesin complex	CC	0.00702943	0.107527
GO:0006869	lipid transport	BP	0.00702943	0.126437
GO:0048046	apoplast	CC	0.0083044	0.0812183
GO:0010106	cellular response to iron ion starvation	BP	0.0083044	0.140625
GO:0019953	sexual reproduction	BP	0.0085708	0.2
GO:0008283	cell population proliferation	BP	0.0085708	0.0896552
GO:0009987	cellular process	BP	0.00971406	0.0730381
GO:0010411	xyloglucan metabolic process	BP	0.0121004	0.25
GO:0009913	epidermal cell differentiation	BP	0.0124946	0.0717423
GO:0072330	monocarboxylic acid biosynthetic process	BP	0.0145811	0.625
GO:0010067	procambium histogenesis	BP	0.0155494	0.272727
GO:0004445	inositol-polyphosphate 5-phosphatase activity	MF	0.01599	0.24
GO:0052658	inositol-1,4,5-trisphosphate 5-phosphatase activity	MF	0.01599	0.24
GO:0052659	inositol-1,3,4,5-tetrakisphosphate 5-phosphatase activity	MF	0.01599	0.24
GO:0051707	response to other organism	BP	0.0209855	0.115942
GO:0048513	animal organ development	BP	0.0224897	0.0622837
GO:0009624	response to nematode	BP	0.0241041	0.0904977
GO:0009809	lignin biosynthetic process	BP	0.0241041	0.149425
GO:0005802	trans-Golgi network	CC	0.0244439	0.0740741
GO:0010413	glucuronoxylan metabolic process	BP	0.0246849	0.1
GO:0015706	nitrate transport	BP	0.0246849	0.107692
GO:0016413	O-acetyltransferase activity	MF	0.0300637	0.178571
GO:0003860	3-hydroxyisobutyryl-CoA hydrolase activity	MF	0.0339111	0.333333
GO:0009742	brassinosteroid mediated signaling pathway	BP	0.0343712	0.122642
GO:0080040	positive regulation of cellular response to phosphate starvation	BP	0.037313	0.571429
GO:0045492	xylan biosynthetic process	BP	0.0375236	0.097561
GO:0033198	response to ATP	BP	0.0392857	0.428571
GO:0005768	endosome	CC	0.0397669	0.075
GO:0008233	peptidase activity	MF	0.0407782	0.118644
GO:0010192	mucilage biosynthetic process	BP	0.0447303	0.263158
GO:0042546	cell wall biogenesis	BP	0.0469779	0.117188
GO:0051262	protein tetramerization	BP	0.0489719	0.363636

## Sheet: genotype
	No significantly enriched GO terms found.
