# Supplementary material for: Plant Age and Soil Texture Rather Than the Presence of Root Hairs Cause Differences in Maize Resource Allocation and Root Gene Expression in the Field
Source: Plants (Basel). 2022 Oct 28;11(21):2883. doi: 10.3390/plants11212883 (PMC9657941; doi:10.3390/plants11212883)
Supplement: Supplementary file 1 [file plants-11-02883-s001.zip › Table S8.xlsx]

## Sheet: Sheet1
Plant age and soil texture rather than the presence of root hairs cause differences in maize resource allocation and root gene expression in the field
Plants
Minh Ganther, Eva Lippold, Manuela Désirée Bienert, Marie-Lara Bouffaud, Mario Bauer, Louis Baumann, Gerd Patrick Bienert, Doris Vetterlein, Anna Heintz-Buschart, Mika Tapio Tarkka*
*Corresponding Author: mika.tarkka@ufz.de (Helmholtz-Institute for Environmental Research - UFZ, Halle, Germany)
Table S8. Differentially expressed genes (DEG) by root hair genotype (rth3 vs WT) in three independent experiments.
Differential expression was determined by the DESeq package (Wald test). Only genes with corrected p-value padj<0.05 are included.
Sheet 'DEG' lists all DEG in each of the three experiments. Sheet 'Core_DEG' lists the overlapping DEG.
LFC: log2 fold change
SPE: soil plot experiment (this study)
SCE: soil column experiment (Ganther et al. 2021)
RBE: rhizobox experiment (in preparation)

## Sheet: DEG
Soil Plot Experiment (SPE)					Soil Column Experiment (SCE)					Rhizobox Experiment (RBE)
gene_id	LFC	padj	description		gene_id	LFC	padj	description		gene_ID	LFC	padj	description
Zm00001d028835	-2.35339	3.30597e-19	NA		Zm00001d017866	7.38691	0	Aspartyl protease AED1		Zm00001d017866	7.60114	1.88619e-261	Aspartyl protease AED1
Zm00001d028826	-2.19062	3.82424e-19	COBRA-like protein 7		Zm00001d028780	-1.67949	2.83045e-224	Tetraspanin-18		Zm00001d028826	-2.88711	1.13978e-115	COBRA-like protein 7
Zm00001d025851	3.82479	1.42389e-18	Xyloglucan 6-xylosyltransferase 2		Zm00001d028748	-11.4933	8.49269e-127	NA		Zm00001d028748	-11.6559	9.98559e-114	NA
Zm00001d028811	-1.44841	5.75429e-17	Xyloglucan 6-xylosyltransferase 2		Zm00001d028826	-2.70742	1.57526e-114	COBRA-like protein 7		Zm00001d002917	-5.53232	2.61575e-103	RNA-binding region RNP-1
Zm00001d028808	-1.77731	6.00236e-17	senescence associated gene 20		Zm00001d028835	-3.68089	2.02608e-93	NA		Zm00001d017867	4.18356	4.21026e-99	Aspartyl protease AED1
Zm00001d038046	-27.6578	2.16698e-16	Rho GDP-dissociation inhibitor 1		Zm00001d017867	4.86444	3.74502e-52	Aspartyl protease AED1		Zm00001d028783	-2.45062	1.3263e-98	Expressed protein; protein
Zm00001d008040	-25.8659	4.30477e-14	NA		Zm00001d047967	5.44359	1.86026e-43	bZIP transcription factor 16		Zm00001d028726	-0.796204	1.29198e-93	protein disulfide isomerase9
Zm00001d014509	4.82195	5.18583e-14	NAD(P)-binding Rossmann-fold superfamily protein		Zm00001d028746	1.26173	3.28797e-41	Phosphoinositide phospholipase C 4		Zm00001d028835	-4.10842	4.28231e-77	NA
Zm00001d028799	2.19089	6.63169e-13	NA		Zm00001d017865	6.71829	1.16415e-37	Chloride channel protein CLC-f		Zm00001d051264	8.49866	3.02173e-67	Xyloglucan 6-xylosyltransferase 2
Zm00001d051264	4.63681	3.45422e-12	Xyloglucan 6-xylosyltransferase 2		Zm00001d040462	-0.596793	8.62152e-34	COP9 signalosome complex subunit 2		Zm00001d025851	8.02557	5.96325e-56	Xyloglucan 6-xylosyltransferase 2
Zm00001d023018	-24.0421	4.63821e-12	NA		Zm00001d040699	6.55871	2.41868e-33	Mitochondrial import inner membrane translocase subunit TIM22-1		Zm00001d028799	2.5425	7.41854e-46	NA
Zm00001d028780	-0.950358	2.25375e-10	Tetraspanin-18		Zm00001d026647	-0.689948	9.47886e-33	DNA mismatch repair protein MSH3		Zm00001d040462	-0.758168	1.17812e-42	COP9 signalosome complex subunit 2
Zm00001d028746	1.25365	2.48179e-10	Phosphoinositide phospholipase C 4		Zm00001d028811	-1.42416	1.59854e-31	Xyloglucan 6-xylosyltransferase 2		Zm00001d017865	6.36729	9.65889e-41	Chloride channel protein CLC-f
Zm00001d028838	-1.06282	1.05765e-09	Long cell-linked locus protein		Zm00001d028726	-0.487743	4.02305e-28	protein disulfide isomerase9		Zm00001d004658	7.00523	1.92234e-40	NA
Zm00001d028766	4.43675	8.85691e-08	Asparagine synthetase [glutamine-hydrolyzing] 1		Zm00001d028807	-0.922252	8.70528e-28	40S ribosomal protein S28		Zm00001d014509	6.72786	1.72544e-37	NAD(P)-binding Rossmann-fold superfamily protein
Zm00001d040289	3.35611	8.85691e-08	DUF4378 domain protein		Zm00001d028757	-0.579555	2.4195e-27	Transcription factor bHLH140		Zm00001d032045	-1.07234	6.71038e-24	Probable 6-phosphogluconolactonase 5 chloroplastic
Zm00001d023150	8.6347	8.85691e-08	NA		Zm00001d051264	5.86672	7.57647e-27	Xyloglucan 6-xylosyltransferase 2		Zm00001d028725	-0.948293	9.73518e-24	Beta3-glucuronyltransferase
Zm00001d002917	-2.33857	1.82988e-05	RNA-binding region RNP-1		Zm00001d028725	-1.08484	1.08511e-26	Beta3-glucuronyltransferase		Zm00001d028761	1.13462	3.89675e-22	Tetratricopeptide repeat (TPR)-like superfamily protein
Zm00001d018705	0.777579	2.47657e-05	NA		Zm00001d047695	4.29088	1.36629e-26	Putative pyridoxal phosphate (PLP)-dependent transferase family protein		Zm00001d048123	-4.18416	3.6953e-21	MFP1 attachment factor 1
Zm00001d028726	-0.592027	2.76605e-05	protein disulfide isomerase9		Zm00001d028745	-3.89672	2.91904e-26	Rhodanese-like family protein		Zm00001d040289	5.35472	3.94657e-21	DUF4378 domain protein
Zm00001d028745	-2.21518	6.20044e-05	Rhodanese-like family protein		Zm00001d014508	4.99741	1.35367e-20	NA		Zm00001d028836	-0.830589	6.3046e-20	NA
ENSRNA049479077	6.37267	0.000180999	NA		Zm00001d014509	4.98971	1.95544e-20	NAD(P)-binding Rossmann-fold superfamily protein		Zm00001d028808	-1.19574	1.97416e-17	senescence associated gene 20
Zm00001d023342	4.52146	0.000222061	Probable peptide/nitrate transporter		Zm00001d028783	-1.22802	1.94857e-18	Expressed protein; protein		Zm00001d028780	-1.33876	2.4403e-17	Tetraspanin-18
Zm00001d000086	-0.704999	0.00027069	RNA-binding (RRM/RBD/RNP motifs) family protein		Zm00001d032045	-0.850339	1.15331e-17	Probable 6-phosphogluconolactonase 5 chloroplastic		Zm00001d028721	-2.34507	7.65239e-17	LOB domain protein 11
Zm00001d001964	1.72646	0.000324246	SAUR-like auxin-responsive protein family		Zm00001d051773	2.25565	5.74594e-17	Zinc finger (C3HC4-type RING finger) family protein		Zm00001d028830	-0.603249	3.16322e-15	P-loop nucleoside triphosphate hydrolases superfamily protein with CH (Calponin Homology) domain
Zm00001d019312	1.11695	0.000324246	beta glucosidase aggregating factor1		Zm00001d039319	0.280605	1.06525e-16	GTP binding;GTP binding		Zm00001d028818	-0.264744	8.40545e-15	Calpain-type cysteine protease DEK1
Zm00001d024995	1.01082	0.000896898	Expressed protein; protein		Zm00001d044668	-2.88829	1.26358e-16	Protein PLASTID MOVEMENT IMPAIRED 1-RELATED 1		Zm00001d027557	2.17735	1.87311e-14	glutathione transferase31
Zm00001d028783	-1.00765	0.00118477	Expressed protein; protein		Zm00001d003859	-5.0118	1.28494e-16	Potassium transporter 5		Zm00001d007277	1.01529	2.62718e-14	Brassinosteroid LRR receptor kinase
Zm00001d028917	1.16036	0.00118477	NA		Zm00001d016183	4.59797	1.40594e-16	Coatomer subunit epsilon-2		Zm00001d028757	-0.47869	3.21825e-14	Transcription factor bHLH140
Zm00001d019504	1.68612	0.00122845	Plasma membrane associated protein		Zm00001d028838	-1.86104	1.63208e-16	Long cell-linked locus protein		Zm00001d028745	-2.22424	6.7619e-13	Rhodanese-like family protein
Zm00001d029816	1.58378	0.00151508	Pollen Ole e 1 allergen and extensin family protein		Zm00001d028728	-0.32573	9.11347e-15	RNA pseudouridine synthase 5		Zm00001d045907	-3.63271	1.30011e-12	NA
Zm00001d050274	-1.3871	0.00198361	RNA-binding (RRM/RBD/RNP motifs) family protein		Zm00001d017097	0.927186	1.33337e-14	Rhodanese-like domain-containing protein 11 chloroplastic		Zm00001d034078	-3.92173	4.08155e-12	ATP-dependent DNA helicase
Zm00001d028815	-1.41056	0.00203059	Pathogenesis-related protein 10		Zm00001d028799	4.21133	1.47878e-14	NA		Zm00001d028811	-0.801936	6.53548e-12	Xyloglucan 6-xylosyltransferase 2
Zm00001d001076	2.73142	0.00219338	NA		Zm00001d028818	-0.330218	2.80641e-13	Calpain-type cysteine protease DEK1		Zm00001d009570	-0.910168	9.62857e-12	Splicing factor U2af subunit isoform 1; Splicing factor U2af subunit isoform 2; Splicing factor U2af subunit isoform 3; Splicing factor U2af subunit isoform 4; Splicing factor U2af subunit isoform 5
Zm00001d001075	2.72586	0.00219398	NA		Zm00001d028784	-0.393067	3.57535e-13	Mitochondrial substrate carrier family protein		ENSRNA049478140	-1.08363	1.97666e-11	NA
Zm00001d001074	2.72529	0.00222119	NA		Zm00001d040014	0.783413	9.7301e-13	Nuclease PA3		Zm00001d018049	0.53669	3.56277e-11	HVA22-like protein a
Zm00001d028768	0.74127	0.00246383	NA		Zm00001d031877	-5.09208	3.08561e-12	NA		Zm00001d034547	0.505537	3.92867e-11	NA
Zm00001d004867	-1.80072	0.00246383	NA		Zm00001d028802	-0.369039	6.65244e-12	NA		Zm00001d028837	-0.485996	4.62314e-11	Anaphase-promoting complex subunit 11
Zm00001d024486	2.35378	0.00246752	terpene synthase10		Zm00001d028731	0.241258	3.14984e-11	Dolichyldiphosphatase 1		Zm00001d028819	-4.49392	1.21015e-10	Probable pectinesterase/pectinesterase inhibitor 58
Zm00001d028748	-2.98851	0.00273166	NA		Zm00001d019250	1.05812	3.85668e-11	Cytokinin-N-glucosyltransferase 1		Zm00001d028809	0.616206	6.85331e-10	PLAC8 family protein
Zm00001d024437	1.12341	0.00273166	NA		Zm00001d019312	0.848228	4.1204e-11	beta glucosidase aggregating factor1		Zm00001d028759	0.733698	7.12857e-09	Pyruvate decarboxylase isozyme 3
Zm00001d036366	3.25675	0.00291579	Basic endochitinase B		Zm00001d031434	0.652382	4.72847e-11	DNA-damage-repair/toleration protein DRT100		Zm00001d029820	0.701179	8.50748e-09	Cyclin-dependent protein kinase inhibitor SMR1
Zm00001d047967	2.55237	0.00291579	bZIP transcription factor 16		Zm00001d018915	6.09806	5.24913e-11	Bifunctional inhibitor/lipid-transfer protein/seed storage 2S albumin superfamily protein		Zm00001d024496	-1.31195	1.06276e-08	NA
Zm00001d008956	0.932059	0.00392277	NA		Zm00001d028803	-0.749278	7.72966e-11	Protein SCAR2		Zm00001d028269	-0.52959	1.63042e-08	ATP-dependent DNA helicase
Zm00001d041173	1.38728	0.00511516	Beta-glucosidase 17		Zm00001d052877	2.95302	2.10619e-10	embryo defective 1379		Zm00001d028784	-0.546407	1.63042e-08	Mitochondrial substrate carrier family protein
Zm00001d047404	1.40946	0.00535711	Low temperature viability protein		Zm00001d024496	-1.12051	3.18207e-10	NA		Zm00001d040285	1.3315	1.63042e-08	NA
Zm00001d031426	0.868192	0.00697372	Serine/threonine-protein kinase UCNL		Zm00001d048710	-1.66391	3.56988e-10	benzoxazinone synthesis2		Zm00001d043071	-0.555824	2.29481e-08	Probable inactive receptor kinase
Zm00001d041743	0.771924	0.00697372	NA		Zm00001d042402	2.27349	4.11142e-10	NA		Zm00001d008588	1.07652	2.55041e-08	cytochrome P450 family 77 subfamily A polypeptide 5 pseudogene
Zm00001d048123	-1.2241	0.00700964	MFP1 attachment factor 1		Zm00001d036764	-2.58193	4.46988e-10	Putative methyltransferase family protein		Zm00001d030958	1.57405	3.69998e-08	TRAF-like superfamily protein
Zm00001d026577	0.896416	0.0077497	Probable cysteine protease RD21B		Zm00001d028815	-1.07109	7.35141e-10	Pathogenesis-related protein 10 [Source:UniProtKB/TrEMBL;Acc:Q29SB6]		Zm00001d028762	-0.2939	4.45637e-08	6-phosphofructo-2-kinase/fructose-26-bisphosphatase
Zm00001d049657	1.251	0.00794635	Glutathione S-transferase GST 26; Glutathione S-transferase GSTU6		Zm00001d040698	1.72624	8.66647e-09	NA		Zm00001d051563	-0.361173	5.63163e-08	Ornithine carbamoyltransferase chloroplastic
Zm00001d004534	0.92272	0.00856272	AAA-ATPase ASD mitochondrial		Zm00001d036069	0.976043	1.1486e-08	Zinc finger (C3HC4-type RING finger) family protein		Zm00001d028270	-3.5884	5.89261e-08	Multifunctional fusion protein
Zm00001d048770	-0.593852	0.00886641	Ribosome associated membrane protein RAMP4		Zm00001d022305	-0.33358	3.16409e-08	CDPK-related kinase 1		Zm00001d028720	1.94631	6.94024e-08	Phosphatidylinositol transfer protein expressed
Zm00001d007448	1.27482	0.00924186	Pathogenesis-related protein 1		Zm00001d014783	-0.188039	5.3574e-08	BEST Arabidopsis thaliana protein match is: kinectin-related (TAIR:AT5G66250.3); Has 7578 Blast hits to 6129 proteins in 783 species: Archae - 220; Bacteria - 1045; Metazoa - 3605; Fungi - 575; Plants - 442; Viruses - 38; Other Eukaryotes - 1653 (so /.../NCBI BLink).		Zm00001d008913	-1.70359	9.8306e-08	evolutionarily conserved C-terminal region 10
Zm00001d009398	0.806894	0.00924186	Methylesterase 3		Zm00001d007277	1.06969	6.15012e-08	Brassinosteroid LRR receptor kinase		Zm00001d028728	-0.330901	1.16941e-07	RNA pseudouridine synthase 5
Zm00001d032077	1.50144	0.00957699	Ethylene-responsive transcription factor ERF018		Zm00001d048123	-2.31917	6.52182e-08	MFP1 attachment factor 1		Zm00001d042270	0.535329	1.60394e-07	Heavy metal transport/detoxification superfamily protein
Zm00001d007840	3.18425	0.0125737	AP2-like ethylene-responsive transcription factor ANT		Zm00001d047933	-2.3649	8.42983e-08	Proline-rich protein		Zm00001d033061	0.649162	1.79215e-07	Protein DETOXIFICATION 40
Zm00001d028834	-0.50517	0.0135881	Peroxisomal biogenesis factor 11 family protein		Zm00001d021300	0.773861	8.93272e-08	Histone H2A		Zm00001d014418	-0.256815	2.14683e-07	Putative WEB family protein chloroplastic
Zm00001d024000	3.10351	0.0135881	beta-glucosidase3		Zm00001d054057	-2.06328	1.36855e-07	nitrate transport2		Zm00001d007424	0.800222	2.46461e-07	Long chain base biosynthesis protein 1
Zm00001d025346	1.95271	0.0135881	Protein TERMINAL FLOWER 1		Zm00001d028761	0.507991	1.46478e-07	Tetratricopeptide repeat (TPR)-like superfamily protein		Zm00001d051344	0.397297	2.46461e-07	NA
Zm00001d024738	1.58478	0.0157317	Peroxidase 64		Zm00001d009957	0.731405	1.7083e-07	NA		Zm00001d024088	-0.24754	2.60492e-07	Enhancer of polycomb-like transcription factor protein
Zm00001d016601	0.783765	0.016512	Phosphatidylinositol/phosphatidylcholine transfer protein SFH10		Zm00001d028808	-1.44531	1.91032e-07	senescence associated gene 20		Zm00001d043400	0.89635	3.06048e-07	NA
ENSRNA049479261	12.4105	0.0178682	NA		Zm00001d005546	0.597307	2.43754e-07	ADP glucose pyrophosphorylase small subunit embryo 1		Zm00001d051906	0.444843	4.62529e-07	Tumor protein; Tumor-related protein
Zm00001d028769	0.887321	0.0193967	tetratricopeptide repeat (TPR)-containing protein		Zm00001d016933	-1.48422	2.4916e-07	loricrin-related		Zm00001d011507	0.40808	5.37081e-07	Polynucleotidyl transferase ribonuclease H-like superfamily protein
Zm00001d021906	2.46174	0.0193967	Chlorophyll a-b binding protein		Zm00001d050272	0.877572	3.24136e-07	UPF0503 protein chloroplastic		Zm00001d012211	-0.159786	5.69444e-07	Probable methyltransferase PMT25
Zm00001d049770	1.53169	0.0203559	NA		Zm00001d033407	-0.967891	3.84728e-07	Transcription factor bHLH28		Zm00001d039591	0.517312	6.09636e-07	NA
Zm00001d035801	2.06281	0.0203559	Xyloglucan 6-xylosyltransferase 2		Zm00001d012229	-0.971067	4.61195e-07	Amino acid permease 6		Zm00001d023495	0.714467	6.23947e-07	Magnesium/proton exchanger
Zm00001d015216	-2.43074	0.0220747	Salicylate/benzoate carboxyl methyltransferase		Zm00001d034673	0.623252	4.77411e-07	Bowman-Birk type trypsin inhibitor		Zm00001d035801	3.03433	9.09971e-07	Xyloglucan 6-xylosyltransferase 2
Zm00001d029183	2.66415	0.023486	cytochrome P450 family 81 subfamily D polypeptide 8		Zm00001d025795	2.16251	5.21515e-07	Trafficking protein particle complex II-specific subunit 120 homolog		Zm00001d034725	-2.08257	9.80648e-07	Haloacid dehalogenase-like hydrolase (HAD) superfamily protein
Zm00001d033320	0.525507	0.023486	UDP-glycosyltransferase 91A1		Zm00001d034770	-0.261142	5.94723e-07	Cellulose synthase-6		Zm00001d006504	-0.179439	1.15351e-06	Microtubule-associated protein TORTIFOLIA1
Zm00001d049011	0.860261	0.023486	Polyketide cyclase/dehydrase and lipid transport superfamily protein		Zm00001d026635	-0.643259	9.00029e-07	Allantoinase		Zm00001d040027	1.19932	1.23182e-06	Bowman-Birk type wound-induced proteinase inhibitor WIP1
Zm00001d039323	-0.721825	0.023486	Indole-3-pyruvate monooxygenase YUCCA2		Zm00001d051906	0.68284	9.30886e-07	Tumor protein%3B Tumor-related protein		Zm00001d045320	0.844178	1.37937e-06	Transcription elongation factor 1 homolog
Zm00001d045321	-1.50372	0.023486	Dehydrin family protein expressed; Embryogenic-cell protein 40 (Ecp40); protein		Zm00001d022669	0.642166	9.33046e-07	NA		Zm00001d000086	-0.743738	1.3913e-06	RNA-binding (RRM/RBD/RNP motifs) family protein
Zm00001d007631	1.61637	0.0255013	NA		Zm00001d034741	-3.35954	9.33046e-07	NA		Zm00001d050323	0.721691	1.48737e-06	Putative cytochrome P450 superfamily protein
Zm00001d039529	0.945478	0.0255013	GDSL esterase/lipase		Zm00001d036066	1.96804	1.45528e-06	Zinc finger (C3HC4-type RING finger) family protein		Zm00001d028776	1.87452	1.50608e-06	Thioredoxin superfamily protein
Zm00001d016160	1.33266	0.0255013	Potassium channel KAT1		Zm00001d028801	-0.1729	1.74316e-06	26S proteasome regulatory subunit 4 homolog A		Zm00001d042969	3.14152	1.57669e-06	V-type proton ATPase subunit a1
Zm00001d026131	-0.779444	0.0255013	Lysine histidine transporter-like 7		Zm00001d036072	1.23803	1.98019e-06	Zinc finger (C3HC4-type RING finger) family protein		Zm00001d028806	0.95643	1.70961e-06	Sex determination protein tasselseed-2
Zm00001d043226	1.35727	0.0259578	Polyphenol oxidase chloroplastic		Zm00001d026130	0.90754	2.09041e-06	BZIP transcription factor		Zm00001d008287	0.190488	2.34743e-06	Phenazine biosynthesis PhzC/PhzF protein
Zm00001d021736	1.07985	0.0259578	Cellulose synthase-like protein D3		Zm00001d023420	-0.69285	2.66747e-06	Protein TERMINAL FLOWER 1		Zm00001d023757	0.402234	2.76941e-06	NAD(P)H-quinone oxidoreductase subunit U chloroplastic
Zm00001d008601	-0.681973	0.0259578	Putative MYB DNA-binding domain superfamily protein		Zm00001d024523	-0.236092	2.76662e-06	Ramosa 1 enhancer locus 2%3B Ramosa1 enhancer locus2		Zm00001d008869	-0.294353	2.82421e-06	Class III HD-Zip III protein HB8; Putative homeobox/bZIP/lipid-binding protein family
Zm00001d010169	1.87832	0.0259578	Cysteine-rich receptor-like protein kinase 40		Zm00001d029353	-6.82176	2.84893e-06	benzoxazinone synthesis12		Zm00001d043723	0.394833	4.4097e-06	F-box/kelch-repeat protein
Zm00001d045173	1.501	0.0259578	NA		Zm00001d036010	-0.40552	3.52733e-06	Oligopeptide transporter 7		Zm00001d021122	0.326158	6.24899e-06	cobalt ion binding
Zm00001d026171	1.75396	0.0259578	Expansin-B4		Zm00001d018705	0.780704	3.72105e-06	NA		Zm00001d036764	-2.79132	6.63201e-06	Putative methyltransferase family protein
Zm00001d029566	0.873134	0.0269366	DUF1336 domain containing protein expressed		Zm00001d014961	-0.227818	4.96344e-06	Tetratricopeptide repeat (TPR)-like superfamily protein		Zm00001d031008	0.280494	7.71791e-06	Protein tesmin/TSO1-like CXC 4
Zm00001d028270	2.18647	0.0271435	Multifunctional fusion protein		Zm00001d039461	-0.607613	5.50626e-06	Harpin-induced protein		Zm00001d036418	0.297667	8.16245e-06	B-box zinc finger protein 20
Zm00001d029896	1.1315	0.0280674	GATA transcription factor 2		Zm00001d028816	-1.13603	7.55726e-06	Pathogenesis-related protein 10		Zm00001d011275	0.355329	1.02376e-05	DUF538 family protein
Zm00001d014820	1.44491	0.0284781	GDSL esterase/lipase		Zm00001d023280	0.829594	7.9853e-06	NA		Zm00001d028807	-0.377825	1.03385e-05	40S ribosomal protein S28
Zm00001d032886	2.01622	0.0286202	Expansin-A11		Zm00001d045907	-3.419	8.55745e-06	NA		Zm00001d047677	-0.358447	1.04567e-05	P-loop nucleoside triphosphate hydrolases superfamily protein with CH (Calponin Homology) domain
Zm00001d035400	-0.607213	0.0310877	NA		Zm00001d013256	-0.245528	9.15047e-06	Brittle stalk-2-like protein 4		Zm00001d007420	0.656791	1.11783e-05	NA
Zm00001d046186	1.4023	0.0320681	Peroxidase 52		Zm00001d007700	1.78206	1.02871e-05	NAD(P)-binding Rossmann-fold superfamily protein		Zm00001d035865	0.621841	1.33087e-05	HXXXD-type acyl-transferase family protein
Zm00001d052581	0.545741	0.0324124	Disease resistance protein RPM1		Zm00001d020479	0.737884	1.10153e-05	Eukaryotic translation initiation factor 3 subunit E		Zm00001d041877	0.447545	1.33617e-05	Filament-like plant protein 3
Zm00001d033044	1.21449	0.0325795	GDSL esterase/lipase		Zm00001d054060	-1.52487	1.24924e-05	nitrate transport1		Zm00001d017825	0.407625	1.60265e-05	AT-hook motif nuclear-localized protein 29
Zm00001d043458	1.29796	0.0358135	GDSL esterase/lipase		Zm00001d031993	0.698661	1.58878e-05	Rhamnogalacturonate lyase family protein		Zm00001d031158	1.6305	1.90396e-05	pathogenesis related protein5
Zm00001d028806	0.535296	0.0358765	Sex determination protein tasselseed-2		Zm00001d038484	-1.82195	1.58878e-05	protein kinase-related		Zm00001d041604	0.480391	1.92464e-05	bZIP transcription factor 53
Zm00001d040705	0.742122	0.0358765	Peroxidase 64		Zm00001d040681	-0.54464	1.58937e-05	alpha/beta-Hydrolases superfamily protein		Zm00001d032363	1.16551	1.92464e-05	Pirin-like protein 2
Zm00001d010442	1.26888	0.0358765	Putative wall-associated receptor protein kinase family protein		Zm00001d031814	-0.86696	1.83625e-05	Patatin class 1		Zm00001d031949	0.720848	1.94503e-05	NA
Zm00001d046362	2.60052	0.0358765	root hair specific 4		Zm00001d019555	0.407304	1.87251e-05	Two-component response regulator ARR3		Zm00001d005018	0.673632	1.94503e-05	Protein DETOXIFICATION 21
Zm00001d041611	2.8945	0.0382059	NA		Zm00001d012400	0.234833	1.94073e-05	Probable methyltransferase PMT10		Zm00001d005001	0.371755	1.98005e-05	transporter of mugineic acid3
Zm00001d018281	1.2689	0.0382059	Subtilisin-like protease SBT1.4		Zm00001d028721	-2.33588	2.02181e-05	LOB domain protein 11		Zm00001d011419	0.618872	2.34825e-05	Putative cytochrome P450 superfamily protein
Zm00001d022290	0.947105	0.0382059	Peroxidase 64		Zm00001d003369	-0.213365	2.37817e-05	18S pre-ribosomal assembly protein gar2-related		Zm00001d042386	0.395823	2.37788e-05	NA
Zm00001d011922	1.1604	0.0403137	Protein RALF-like 33		Zm00001d038346	-0.345487	2.56843e-05	NA		Zm00001d020414	-0.297302	2.54053e-05	Putative 1-phosphatidylinositol-3-phosphate 5-kinase FAB1C
Zm00001d031636	1.00375	0.0405332	Lipid transfer protein		Zm00001d039347	-0.959507	2.69129e-05	sugars will eventually be exported transporter3b		Zm00001d051620	0.365881	2.81368e-05	AT-hook motif nuclear-localized protein 29
Zm00001d001761	1.98124	0.0405899	NA		Zm00001d051452	1.44651	3.37147e-05	Protein kinase superfamily protein		Zm00001d048683	0.493483	2.81368e-05	Putative RING zinc finger domain superfamily protein
Zm00001d032094	0.700474	0.0410395	SAUR33-auxin-responsive SAUR family member		Zm00001d028810	0.337436	3.511e-05	LL-diaminopimelate aminotransferase chloroplastic		Zm00001d044037	0.3847	3.1827e-05	Protein trichome birefringence-like 39
Zm00001d039700	0.965772	0.0410395	Transcription factor MYB86		Zm00001d008756	-0.647375	3.5429e-05	HXXXD-type acyl-transferase family protein		Zm00001d016696	0.271457	3.36018e-05	alpha/beta-Hydrolases superfamily protein
Zm00001d040247	2.23808	0.0410395	Putative expansin-A17		Zm00001d039264	-0.445228	3.5429e-05	D-amino-acid transaminase chloroplastic		Zm00001d035443	0.184467	4.00246e-05	Putative acetylornithine/succinylornithine aminotransferase family protein
Zm00001d033942	1.38138	0.041493	Disease resistance-responsive (dirigent-like protein) family protein		Zm00001d024418	-0.250394	3.92392e-05	Syntaxin/t-SNARE family protein		Zm00001d043610	1.10446	4.17925e-05	NA
Zm00001d048418	1.69084	0.0421346	Expansin-A11		Zm00001d007185	-0.267003	4.22081e-05	NA		Zm00001d042641	-0.200993	4.63342e-05	RNA-binding (RRM/RBD/RNP motifs) family protein
Zm00001d013409	2.64088	0.0425218	ZF-HD protein dimerisation region containing protein		Zm00001d028834	-0.411593	4.22081e-05	Peroxisomal biogenesis factor 11 family protein		Zm00001d047159	0.494031	4.69583e-05	Cyclin-dependent protein kinase inhibitor SMR1
Zm00001d024850	2.25308	0.0431166	1-aminocyclopropane-1-carboxylate oxidase 5		Zm00001d037969	0.637931	4.22081e-05	Inhibitor I family protein; Potato inhibitor I family		Zm00001d028834	-0.352575	5.20871e-05	Peroxisomal biogenesis factor 11 family protein
Zm00001d044529	1.66842	0.0433469	Protein NRT1/ PTR FAMILY 6.2		Zm00001d002851	-0.439956	4.511e-05	Probable galacturonosyltransferase-like 3		Zm00001d021403	0.302887	5.33387e-05	indeterminate1 domain7
Zm00001d027717	1.42504	0.0435149	Expansin-A11		Zm00001d042293	-0.771611	4.74036e-05	L-type lectin-domain containing receptor kinase IX.1		Zm00001d028746	0.76328	5.68209e-05	Phosphoinositide phospholipase C 4
Zm00001d037703	1.09903	0.0435149	NA		Zm00001d023243	0.287863	4.76651e-05	2-isopropylmalate synthase 1 chloroplastic		Zm00001d035462	1.61533	6.20138e-05	jasmonate-regulated gene 21
Zm00001d028727	0.436408	0.0456915	alpha/beta-Hydrolases superfamily protein		Zm00001d028601	-0.454481	4.83575e-05	Haloacid dehalogenase-like hydrolase (HAD) superfamily protein		Zm00001d031586	0.497876	6.30121e-05	RING/U-box superfamily protein
Zm00001d028754	-0.985856	0.0456915	mitogen-activated protein kinase kinase kinase 13		Zm00001d002939	-0.361528	4.90919e-05	C2 calcium/lipid-binding plant phosphoribosyltransferase family protein		Zm00001d008985	-0.9259	6.73116e-05	Putative cytochrome P450 superfamily protein
Zm00001d052810	-0.529304	0.0456915	Esterase/lipase/thioesterase		Zm00001d022918	-0.403873	4.90919e-05	NA		Zm00001d021453	0.258724	6.73116e-05	Regulator of Vps4 activity in the MVB pathway protein
Zm00001d022289	1.19583	0.045705	Peroxidase 64		Zm00001d032292	-0.403992	4.90919e-05	NA		Zm00001d047536	-0.140023	6.74247e-05	NA
Zm00001d011499	0.896826	0.045705	Ethylene-responsive transcription factor CRF4		Zm00001d044427	-1.25289	4.90919e-05	NA		Zm00001d047907	-1.21484	6.74247e-05	Putative homeodomain-like transcription factor superfamily protein
Zm00001d040545	1.70252	0.0457818	NA		Zm00001d051934	0.772715	4.90919e-05	5-pentadecatrienyl resorcinol O-methyltransferase		Zm00001d032921	0.243199	7.71963e-05	NA
Zm00001d000037	0.829959	0.0457818	Phospholipase A1-Ibeta2 chloroplastic		Zm00001d035084	-0.623162	5.07575e-05	Putative NAC domain transcription factor superfamily protein		Zm00001d030998	0.460509	7.72678e-05	Protein ROOT HAIR DEFECTIVE 3 homolog 2
Zm00001d004671	2.07947	0.0467261	NA		Zm00001d026737	-2.27957	5.23343e-05	NA		Zm00001d044156	1.01734	7.87264e-05	cytochrome P450 family 72 subfamily A polypeptide 8
Zm00001d043235	0.962911	0.0467261	Methylesterase 3		Zm00001d037978	-0.347559	5.26622e-05	Protein ESKIMO 1		Zm00001d002475	0.258471	8.74516e-05	Binding partner of ACD11 1
Zm00001d013177	0.762835	0.0467261	Electron transporter		Zm00001d028315	-1.00367	5.30103e-05	Transcription factor bHLH18		Zm00001d035486	0.4326	8.75072e-05	NA
Zm00001d011673	0.852736	0.0467261	farnesyl diphosphate synthase2		Zm00001d031077	-0.869408	5.38712e-05	Cation/H(+) antiporter 19		Zm00001d038765	0.424546	9.88217e-05	Anthocyanidin 5,3-O-glucosyltransferase""
Zm00001d037464	1.58231	0.0467261	Putative prolin-rich extensin-like receptor protein kinase family protein		Zm00001d042196	-0.64248	5.62527e-05	Nuclear transcription factor Y subunit B-4		Zm00001d038755	0.28228	0.000103197	Carnitine racemase/ catalytic
Zm00001d038185	0.732256	0.0467261	Protein NRT1/ PTR FAMILY 3.1		Zm00001d008512	0.463415	5.71428e-05	ABC-2 type transporter family protein		Zm00001d041443	-0.314985	0.000112337	Protein NETWORKED 1A
Zm00001d041800	0.728837	0.0475441	BTB/POZ domain-containing protein		Zm00001d029274	-0.745869	5.71428e-05	guaiacol peroxidase2		Zm00001d023501	1.13185	0.000112337	Putative DEAD-box ATP-dependent RNA helicase family protein
Zm00001d040308	1.44358	0.0476111	phosphoadenosine phosphosulfate (PAPS) reductase family protein		Zm00001d032655	-0.798742	5.71428e-05	dicer-like 102		Zm00001d005898	-0.669095	0.000118928	NA
Zm00001d041796	2.27823	0.0476111	Expressed protein; protein		Zm00001d008035	0.378818	5.7548e-05	NA		Zm00001d035899	0.446809	0.000118928	Pectin lyase-like superfamily protein
Zm00001d005690	1.24945	0.0476824	UDP-glycosyltransferase 90A1		Zm00001d002673	0.497249	5.8337e-05	Lysine histidine transporter-like 7		Zm00001d045048	0.74257	0.000172374	pectin methylesterase2
Zm00001d013393	0.642224	0.0476824	Phosphatidylinositol-3-phosphatase myotubularin-1		Zm00001d008488	0.436398	5.98482e-05	Cysteine-rich receptor-like protein kinase 37		Zm00001d027524	1.54128	0.000172387	Basic endochitinase B
Zm00001d032744	-0.590465	0.0478425	Protein NRT1/ PTR FAMILY 5.2		Zm00001d008462	0.800382	6.31158e-05	Cysteine-rich receptor-like protein kinase 37		Zm00001d008251	0.558919	0.000172387	Putative MYB DNA-binding domain superfamily protein
Zm00001d020852	0.959161	0.0482042	Cellulose synthase-like protein E1		Zm00001d028766	5.00353	7.10322e-05	Asparagine synthetase [glutamine-hydrolyzing] 1		Zm00001d009398	0.819134	0.000178865	Methylesterase 3
Zm00001d024166	1.57951	0.0486036	Putative HLH DNA-binding domain superfamily protein isoform 1; Putative HLH DNA-binding domain superfamily protein isoform 2		Zm00001d051804	-0.446778	7.90504e-05	Glutamine synthetase root isozyme 4		Zm00001d002021	0.66183	0.000180824	NA
Zm00001d044039	1.65707	0.0497522	Wax synthase isoform 3		Zm00001d024262	-0.842732	8.03583e-05	NA		Zm00001d001978	-0.144739	0.000194406	MAP3K epsilon protein kinase 1
Zm00001d009957	1.10144	0.049996	NA		Zm00001d002378	-1.92064	8.12499e-05	Sodium transporter HKT1		Zm00001d039920	0.52629	0.000194406	PR5-like receptor kinase
					Zm00001d020178	-0.149837	9.08371e-05	Retinol dehydrogenase 13		Zm00001d037214	-0.215143	0.000194406	Putative ARM repeat-containing protein containing family protein
					Zm00001d028114	0.674917	9.54605e-05	no pollen germination related 1		Zm00001d042555	0.365182	0.000194406	Zinc-binding dehydrogenase family protein
					Zm00001d038485	-1.21768	9.98915e-05	Serine/threonine-protein kinase STN8 chloroplastic		Zm00001d045575	-0.567967	0.000217229	Ferredoxin--NADP reductase leaf isozyme 1 chloroplastic
					Zm00001d005092	-0.293195	0.000112597	Protein ESKIMO 1		Zm00001d027533	0.532083	0.000229075	LysM domain-containing GPI-anchored protein 2
					Zm00001d040196	0.316056	0.000116215	Probable 3-beta-hydroxysteroid-Delta(8)Delta(7)-isomerase		Zm00001d032266	-0.210578	0.000249479	Cytochrome b5
					Zm00001d012569	0.617225	0.000117243	NA		Zm00001d037599	-0.148989	0.00027939	kinesin-related protein9
					Zm00001d022919	-0.401136	0.000117377	NA		Zm00001d036057	0.196256	0.000289675	Thioredoxin superfamily protein
					Zm00001d021062	-0.792046	0.000127121	SAUR-like auxin-responsive protein family		Zm00001d011326	1.30786	0.00029407	Plant Tudor-like RNA-binding protein
					Zm00001d038035	0.319836	0.000135253	ADPATP carrier protein 1 chloroplastic		Zm00001d028731	0.295608	0.000298559	Dolichyldiphosphatase 1
					Zm00001d029516	-0.206483	0.00015053	Probable galacturonosyltransferase 11		Zm00001d025509	0.214928	0.000301279	RmlC-like cupins superfamily protein
					Zm00001d032811	-0.216093	0.000155664	Ras-related protein Rab-18		Zm00001d048096	-0.157848	0.000310478	NA
					Zm00001d039639	-0.89667	0.000158099	Phototropic-responsive NPH3 family protein		Zm00001d008209	2.31211	0.000310478	Peptidyl-prolyl cis-trans isomerase
					Zm00001d025980	0.536487	0.000165443	RNA-metabolising metallo-beta-lactamase family protein		Zm00001d007474	0.329801	0.000325148	protein; Wall-associated kinase 2-like protein
					Zm00001d040238	-0.392289	0.000167885	Probable uridine nucleosidase 2		Zm00001d040698	1.39206	0.000344892	NA
					Zm00001d040731	0.34804	0.000171028	Alpha-L-fucosidase 2		Zm00001d012460	0.356995	0.0003604	BAG family molecular chaperone regulator 4
					Zm00001d017621	0.511144	0.00017571	NA		Zm00001d011492	-0.151428	0.000372667	Eukaryotic translation initiation factor 3 subunit 10
					Zm00001d020953	0.439242	0.000181807	Protein PIN-LIKES 3		Zm00001d005423	0.624614	0.000373669	DNA-directed RNA polymerases II IV and V subunit 12
					Zm00001d037484	-0.207723	0.000223461	Putative clathrin assembly protein		Zm00001d010759	0.38447	0.000375945	DNA-binding WRKY
					Zm00001d043291	0.332185	0.000231243	Purple acid phosphatase 10		Zm00001d042042	-0.428129	0.000380096	RNA-binding (RRM/RBD/RNP motifs) family protein
					Zm00001d048308	0.405092	0.000258763	Putative thaumatin domain family protein		Zm00001d028410	1.04176	0.000388826	Glucan endo-13-beta-glucosidase 10
					Zm00001d002072	1.05124	0.000259552	NA		Zm00001d017755	0.28837	0.000389174	Rop guanine nucleotide exchange factor 14
					Zm00001d008332	2.29684	0.000269571	Cinnamoyl-CoA reductase 1		Zm00001d036550	0.340274	0.000395241	Lipid binding protein
					Zm00001d022346	0.898387	0.000271746	SAC3 family protein B		Zm00001d004737	-0.200249	0.000419273	Armadillo/beta-catenin-like repeat ; C2 calcium/lipid-binding domain (CaLB) protein
					Zm00001d048794	-0.23927	0.000276967	Phosphoserine phosphatase chloroplastic		Zm00001d038913	1.52015	0.000427103	lipid transfer protein1
					Zm00001d018854	-0.602802	0.000293049	Probable carboxylesterase 15		Zm00001d040244	0.598502	0.000427103	pathogenesis-related family protein
					Zm00001d034763	-0.788623	0.000304389	Harpin-induced protein		Zm00001d023558	0.186563	0.000427103	Protein SENSITIVE TO PROTON RHIZOTOXICITY 1
					Zm00001d009186	-0.513554	0.000308466	NA		Zm00001d021136	-0.351155	0.000433688	PTI1-like tyrosine-protein kinase 3
					Zm00001d014748	0.641454	0.000331736	(Z)-3-hexen-1-ol acetyltransferase		Zm00001d024314	-1.02857	0.000434527	Putative cinnamyl-alcohol dehydrogenase family protein
					Zm00001d029579	-0.624665	0.000331736	Transcriptional regulatory protein algP [Source:UniProtKB/TrEMBL;Acc:B6SZD0]		Zm00001d042868	0.649565	0.000436525	Aldo-keto reductase family 4 member C9
					Zm00001d042443	0.850191	0.000331736	BTB/POZ and TAZ domain-containing protein 2		Zm00001d038282	-0.335049	0.000442081	Putative LSTK-1-like/NimA-related protein kinase family protein isoform 1; Putative LSTK-1-like/NimA-related protein kinase family protein isoform 2
					Zm00001d012069	0.865244	0.000340697	DUF506 family protein		Zm00001d008255	0.690583	0.000446115	Yucca6
					Zm00001d026680	0.117382	0.00034413	Soluble inorganic pyrophosphatase 1		Zm00001d047217	0.136258	0.000446314	5-hydroxyisourate hydrolase
					Zm00001d013673	-0.214235	0.000356321	CSL zinc finger domain-containing protein		Zm00001d024661	0.348297	0.000449183	Structural molecule
					Zm00001d016974	-0.979913	0.000379778	NA		Zm00001d051600	-0.169931	0.000460567	Protein CROWDED NUCLEI 1
					Zm00001d038268	0.347195	0.000389145	Probable anion transporter 3 chloroplastic		ENSRNA049478177	-0.796571	0.000505197	NA
					Zm00001d048577	0.337563	0.000396354	Transmembrane amino acid transporter family protein		Zm00001d028803	-0.648143	0.000514952	Protein SCAR2
					Zm00001d028814	0.761711	0.000399316	Pathogenesis-related protein 10 [Source:UniProtKB/TrEMBL;Acc:Q29SB6]		Zm00001d043701	0.834068	0.000517319	IAA-amino acid hydrolase ILR1-like 4
					Zm00001d009795	-0.302266	0.000412652	Cellulose synthase1		Zm00001d052136	0.85495	0.000523393	1-aminocyclopropane-1-carboxylate oxidase20
					Zm00001d038412	-0.294399	0.000412652	Ammonium transporter 2		Zm00001d002898	0.671939	0.000573437	Peroxidase 12
					Zm00001d050694	0.494243	0.000412652	Serine decarboxylase		Zm00001d027585	0.300169	0.000576181	Cyclin-dependent kinase inhibitor 5
					Zm00001d007705	1.39049	0.000416797	NAD(P)-binding Rossmann-fold superfamily protein		Zm00001d010726	0.708965	0.000576181	NA
					Zm00001d037213	-0.269011	0.000427349	binding		Zm00001d012603	0.40775	0.000587545	Methylesterase 3
					Zm00001d044644	0.720627	0.000436767	NA		Zm00001d010012	0.415892	0.000587545	UNE1
					Zm00001d031066	-0.970132	0.00044296	alpha/beta-Hydrolases superfamily protein		Zm00001d038239	0.577873	0.000587545	Whole genome shotgun sequence of line PN40024 scaffold_35.assembly12x (Fragment)
					Zm00001d039010	-0.391811	0.000443095	Fasciclin-like arabinogalactan protein 7		Zm00001d023769	1.21068	0.0006112	Delta(12)-fatty-acid desaturase
					Zm00001d014192	0.193664	0.00045524	ACT domain-containing protein ACR11		Zm00001d016568	0.267895	0.000617993	NA
					Zm00001d016155	-0.31706	0.000455872	Putative callose synthase 8		Zm00001d052480	0.493852	0.00062286	Indole-3-acetate beta-glucosyltransferase
					Zm00001d015569	-0.373081	0.000457866	Vacuolar H+-translocating inorganic pyrophosphatase		Zm00001d039102	0.199172	0.000633698	Probable 2-oxoglutarate-dependent dioxygenase AOP1
					Zm00001d016838	-0.153342	0.000464855	Auxin response factor 1		Zm00001d032582	0.243549	0.000635243	NA
					Zm00001d032316	-0.256293	0.000478605	Homeobox-leucine zipper protein HAT5		Zm00001d032170	-0.249732	0.000635507	NA
					Zm00001d006446	-1.41028	0.000486321	salmon silk2		Zm00001d050694	-0.495387	0.000659075	Serine decarboxylase
					Zm00001d034742	-2.91037	0.000486321	NA		Zm00001d017620	0.523394	0.000664723	Tobamovirus multiplication protein 3
					Zm00001d046996	-0.245173	0.000486321	Tubulin beta-4 chain		Zm00001d017868	0.685724	0.000689835	Chloride channel protein CLC-f
					Zm00001d048870	1.07131	0.000486321	Spermidine hydroxycinnamoyl transferase		Zm00001d039471	0.256996	0.000689835	IQ-domain 6
					Zm00001d021336	0.416752	0.000494688	Serine/threonine-protein kinase STY17		Zm00001d017158	-0.338876	0.000700155	BAG-associated GRAM protein 1
					Zm00001d045112	-0.475262	0.000507632	Putative two-component response regulator family protein		Zm00001d017817	0.978602	0.000701985	NA
					Zm00001d032425	-1.59859	0.000510222	Replication protein-like		Zm00001d030094	-0.314562	0.000726514	Putative WEB family protein chloroplastic
					Zm00001d044667	-0.353661	0.000556157	Nucleic acid binding protein		Zm00001d043273	0.372473	0.00074787	SR protein related family member
					Zm00001d015093	-0.41311	0.000593641	RNA-binding KH domain-containing protein PEPPER		Zm00001d034615	0.50162	0.000759375	Protein LURP-one-related 14
					Zm00001d032540	0.296625	0.000608059	Putative 1-phosphatidylinositol-3-phosphate 5-kinase FAB1D		Zm00001d003271	0.31003	0.000790396	Peptide methionine sulfoxide reductase
					Zm00001d024981	0.582323	0.00061803	hydroxyproline-rich glycoprotein family protein		Zm00001d017176	0.290038	0.000803209	CONSTANS-like protein CO5
					Zm00001d051307	-0.235278	0.000627908	Autophagy-related protein 13a		Zm00001d043129	-0.178236	0.000803209	Ulp1 protease family C-terminal catalytic domain containing protein expressed
					Zm00001d014178	-0.302422	0.000674212	Acylamino-acid-releasing enzyme		Zm00001d050457	0.396311	0.000810861	Protein DETOXIFICATION 27
					Zm00001d022247	-0.296279	0.00067914	calcium ion binding		Zm00001d008992	0.180031	0.000815201	Peroxisomal membrane 22 kDa (Mpv17/PMP22) family protein
					Zm00001d038372	-0.364423	0.000679961	Expressed protein; protein		Zm00001d010325	0.406186	0.000815201	small basic membrane intrinsic protein1b
					Zm00001d054071	-0.487151	0.000679961	Probable receptor-like protein kinase		Zm00001d049233	-0.460238	0.000820142	Protein RALF-like 33
					Zm00001d037617	-0.508766	0.000684228	Hypoxanthine-guanine phosphoribosyltransferase		Zm00001d038591	0.9904	0.000860725	60S ribosomal protein L10a-1
					Zm00001d011679	-1.74993	0.000686232	High affinity nitrate transporter 2.5		Zm00001d043156	-0.398645	0.000860725	F-box protein
					Zm00001d008628	-0.55926	0.00074797	Gamma-glutamyltranspeptidase 3		Zm00001d004086	0.473161	0.000860725	Probable WRKY transcription factor 11
					Zm00001d044845	-0.234912	0.000748508	binding		Zm00001d020732	0.628897	0.000881935	Probable carboxylesterase 2
					Zm00001d045154	-0.243858	0.000748508	Putative clathrin assembly protein		Zm00001d024262	-1.37565	0.000887436	NA
					Zm00001d017042	-0.218217	0.000750399	Serine/threonine-protein kinase Nek4		Zm00001d038192	0.448493	0.000906906	glutathione transferase41
					Zm00001d019048	0.205093	0.000750399	SEC12-like protein 1		Zm00001d002396	-0.204043	0.000937055	Calcium-transporting ATPase 9 plasma membrane-type
					Zm00001d026522	2.02444	0.000750399	Oligouridylate-binding protein 1C		Zm00001d029907	1.23771	0.000937055	Expansin-B4
					Zm00001d043400	0.880984	0.000801485	NA		Zm00001d051250	0.217759	0.000937055	Thioredoxin
					Zm00001d036068	1.21431	0.000803178	Zinc finger (C3HC4-type RING finger) family protein		Zm00001d020332	-0.938985	0.000937055	Ubiquitin-protein ligase
					Zm00001d009580	0.233214	0.000806366	Urease accessory protein G		Zm00001d045427	0.567884	0.000937099	barren stalk fastigiate1
					Zm00001d020497	-0.902961	0.000806366	CBL-interacting serine/threonine-protein kinase 6		Zm00001d019542	-0.213724	0.000958884	COP1-interacting protein-related
					Zm00001d032946	-0.450825	0.000806366	Chitinase 1		Zm00001d039597	0.352062	0.000972714	Protein MARD1
					Zm00001d033573	0.574895	0.000806366	Hydroxyproline O-galactosyltransferase GALT4		Zm00001d019306	0.44184	0.000989721	IAA-amino acid hydrolase ILR1
					Zm00001d014507	-0.330135	0.00084494	Auxin response factor 16		Zm00001d013470	-0.199599	0.000995397	Oxysterol-binding protein-related protein 1C
					Zm00001d008850	-0.58556	0.000851589	Late embryogenesis abundant (LEA) hydroxyproline-rich glycoprotein family		Zm00001d014748	1.35759	0.00103713	(Z)-3-hexen-1-ol acetyltransferase
					Zm00001d003809	1.1508	0.000869975	NA		Zm00001d052103	-0.256065	0.00103713	Pectin lyase-like superfamily protein
					Zm00001d028751	-0.585663	0.000882131	Protein ESKIMO 1		Zm00001d043458	1.31597	0.00104727	GDSL esterase/lipase
					Zm00001d031149	0.429284	0.000882131	Dihydroceramide fatty acyl 2-hydroxylase FAH1		Zm00001d013143	0.747609	0.00105838	NA
					Zm00001d051565	-0.284864	0.000891599	Replication factor C subunit 3		Zm00001d047873	-0.20472	0.00111117	P-loop containing nucleoside triphosphate hydrolases superfamily protein
					Zm00001d002342	-0.392835	0.000939679	Polygalacturonase QRT3		Zm00001d033909	0.61604	0.00112934	Expressed protein; protein
					Zm00001d020589	1.04708	0.000955728	DUF581 family protein		Zm00001d045948	0.414061	0.00115637	Protein DETOXIFICATION 16
					Zm00001d021304	-0.356931	0.000956177	Endoglucanase 2		Zm00001d044261	0.33194	0.0011988	Protein indeterminate-domain 9
					Zm00001d049169	1.07061	0.000976467	Putative FAD-binding Berberine family protein		Zm00001d019670	-0.251646	0.00123039	Kinesin-like protein KIN-4A
					Zm00001d031279	-0.516723	0.000993565	NA		Zm00001d040196	0.33156	0.00126343	Probable 3-beta-hydroxysteroid-Delta(8)Delta(7)-isomerase
					Zm00001d040504	-0.54557	0.00106068	early nodulin-like protein 18		Zm00001d042035	0.361382	0.00127962	Probable sarcosine oxidase
					Zm00001d028806	0.375807	0.00107741	Sex determination protein tasselseed-2		Zm00001d041972	0.689839	0.00139127	Cellulose synthase-like protein G3
					Zm00001d037214	-0.266083	0.00107741	Putative ARM repeat-containing protein containing family protein		Zm00001d025684	1.35266	0.00140706	Putative NAC domain transcription factor superfamily protein
					Zm00001d007725	1.09763	0.00108405	Ankyrin repeat family protein		Zm00001d026611	0.564955	0.00141763	NA
					Zm00001d020264	-0.490483	0.00108434	NA		Zm00001d016585	0.350761	0.00145349	Lipase-like protein
					Zm00001d025509	0.198484	0.00108434	RmlC-like cupins superfamily protein		Zm00001d035694	0.373989	0.00145349	NA
					Zm00001d004523	-0.386443	0.00110294	maternal effect embryo arrest 60		Zm00001d010275	0.323952	0.00150749	beta tubulin2
					Zm00001d027557	0.701017	0.00113064	glutathione transferase31		Zm00001d013256	-0.19754	0.00150749	Brittle stalk-2-like protein 4
					Zm00001d034756	-0.525283	0.00119291	NA		Zm00001d015884	0.970835	0.001512	Protein kinase
					Zm00001d044504	-2.1582	0.00119291	High affinity nitrate transporter 2.7		Zm00001d053899	-0.187497	0.00152309	Rho-related protein from plants2
					Zm00001d049678	-0.748542	0.00119522	NAC domain-containing protein 43		Zm00001d016155	-0.302896	0.00153811	Putative callose synthase 8
					Zm00001d011562	0.359382	0.00122796	Putative DUF1421 domain family protein		Zm00001d028814	1.35902	0.00153992	Pathogenesis-related protein 10
					Zm00001d010578	-0.219372	0.00123647	Protein kinase superfamily protein		Zm00001d034763	-0.711876	0.00162415	Harpin-induced protein
					Zm00001d019542	-0.199392	0.00123983	COP1-interacting protein-related		Zm00001d052451	0.400989	0.00162415	Putative F-box containing family protein
					Zm00001d033110	0.223054	0.00123983	Inositol-phosphate phosphatase		Zm00001d029597	0.203179	0.00167958	Leucine-rich repeat (LRR) family protein
					Zm00001d000534	1.7729	0.00124351	NA		Zm00001d028363	-0.333952	0.00174408	65-kDa microtubule-associated protein 6
					Zm00001d019446	0.798673	0.00125701	farnesylated protein 3		Zm00001d020260	0.260832	0.00175325	Cupredoxin superfamily protein
					Zm00001d010061	0.7403	0.00127503	NA		Zm00001d048590	0.30096	0.00191659	Probable transcriptional regulator RABBIT EARS
					Zm00001d011571	-0.211162	0.00127503	6b-interacting protein 1		Zm00001d040509	-0.242511	0.0019401	beta tubulin5
					Zm00001d018720	-0.348557	0.00127503	NA		Zm00001d004298	0.451263	0.0019401	NA
					Zm00001d052741	0.617746	0.00127503	NC domain-containing protein-related		Zm00001d025762	0.298269	0.0019401	NA
					Zm00001d007462	0.684446	0.00131597	tyrosine aminotransferase homolog1		Zm00001d013908	-0.203412	0.00196815	Myosin heavy chain-related protein
					Zm00001d008477	0.39639	0.00137325	receptor-like kinase4		Zm00001d031431	0.251553	0.00196952	complex I subunit
					Zm00001d027242	0.178303	0.00140301	Granule-bound starch synthase 1 chloroplastic/amyloplastic		Zm00001d040733	1.23171	0.00199824	GDSL esterase/lipase LIP-4
					Zm00001d044642	0.700929	0.00143643	CBL-interacting kinase		Zm00001d019677	-0.151906	0.00201882	F-box protein
					Zm00001d029899	0.516037	0.00147252	beta expansin2		Zm00001d028815	-1.42018	0.00202856	Pathogenesis-related protein 10
					Zm00001d035492	-0.208786	0.00150643	IQ-domain 3		Zm00001d045021	0.194418	0.00211701	Probable phosphopantothenoylcysteine decarboxylase
					Zm00001d002530	-0.512511	0.00155144	NA		Zm00001d015297	-0.32148	0.00211701	protein; Ternary complex factor MIP1-like
					Zm00001d043226	0.761474	0.00163858	Polyphenol oxidase chloroplastic		Zm00001d046460	0.418329	0.00212787	UDP-glycosyltransferase 75B1
					Zm00001d049763	0.912952	0.00164021	NA		Zm00001d050340	0.315868	0.0021508	NA
					Zm00001d048625	-0.702546	0.00165212	O-methyltransferase ZRP4		Zm00001d016669	0.363825	0.00216338	NA
					Zm00001d001192	-0.488063	0.00167591	NA		Zm00001d030862	0.847121	0.0022156	Ethylene-responsive transcription factor RAP2-11
					Zm00001d011051	0.301345	0.0016815	ACT domain-containing protein ACR9		Zm00001d017700	-0.303218	0.0022156	Lysine-specific demethylase REF6
					Zm00001d004375	-0.26567	0.00169659	NA		Zm00001d027330	-0.655934	0.00223514	Remorin
					Zm00001d006449	-0.432914	0.0017084	UDP-glycosyltransferase 71B1		Zm00001d033320	0.296094	0.00223514	UDP-glycosyltransferase 91A1
					Zm00001d032973	-0.72042	0.00173066	Glycerol-3-phosphate acyltransferase 5		Zm00001d033984	-0.170756	0.00223706	Protein SPIRRIG
					Zm00001d011461	-1.67204	0.00175796	uncharacterized protein [Source:UniProtKB/TrEMBL;Acc:B6SMQ8]		Zm00001d037847	-0.25859	0.00223706	Ras-related protein RABA6a
					Zm00001d025247	0.832158	0.0018084	Beta-13-N-Acetylglucosaminyltransferase family protein		Zm00001d030076	1.90082	0.0022606	NA
					Zm00001d022439	-0.8712	0.00184885	Vacuolar-sorting receptor 1		Zm00001d053882	-0.140868	0.0022606	Splicing factor 3B subunit 1
					Zm00001d005019	-0.146254	0.00185202	Acyl-CoA synthetase long-chain family member 3		Zm00001d049813	-0.74262	0.00227026	Triacylglycerol lipase 2
					Zm00001d038351	0.253519	0.00185202	Adenine nucleotide alpha hydrolases-like superfamily protein		Zm00001d000055	-0.422246	0.00232072	bri1-like receptor kinase2
					Zm00001d041743	0.572517	0.00185202	NA		Zm00001d014039	-0.104096	0.00234793	non-intrinsic ABC protein 4
					Zm00001d042853	-0.430222	0.00186213	NA		Zm00001d047923	-0.268036	0.00234793	Putative DUF869 domain containing family protein
					Zm00001d008467	0.659299	0.0018714	Cysteine-rich receptor-like protein kinase 37		Zm00001d008795	0.420008	0.00234793	UDP-glycosyltransferase 74B1
					Zm00001d003116	0.475535	0.0018838	Major facilitator superfamily protein		Zm00001d014623	0.342843	0.00238048	AAA-ATPase ASD mitochondrial
					Zm00001d037540	-0.380033	0.0018838	Fasciclin-like arabinogalactan protein 2		Zm00001d005600	0.439781	0.00238048	NA
					Zm00001d007448	0.973084	0.00192561	Pathogenesis-related protein 1		Zm00001d053740	0.597913	0.00240328	Uncharacterised conserved protein UCP015417 vWA
					Zm00001d039607	0.789748	0.00192561	UDP-glycosyltransferase 75B1		Zm00001d021081	-0.713831	0.00242003	Cyclin/Brf1-like TBP-binding protein
					Zm00001d013676	-0.398534	0.00193876	Nuclear transcription factor Y subunit A-10		Zm00001d021304	-0.266505	0.00243594	Endoglucanase 2
					Zm00001d017726	0.453593	0.00196508	Homeodomain-like superfamily protein		Zm00001d015589	0.428243	0.00251667	Premnaspirodiene oxygenase
					Zm00001d038448	-0.385365	0.00196508	NA		Zm00001d031741	0.335679	0.00252756	NA
					Zm00001d032088	-0.506802	0.00199859	SAUR33-auxin-responsive SAUR family member		Zm00001d031860	0.467007	0.00258208	7-hydroxymethyl chlorophyll a reductase chloroplastic
					Zm00001d050637	0.384922	0.00200706	SAM domain family protein%3B SAM domain protein		Zm00001d038506	0.32462	0.00261906	KH domain-containing protein
					Zm00001d007331	0.590259	0.00201638	Expressed protein; protein		Zm00001d009751	-0.280028	0.00264542	Chromatin modification-related protein EAF1 B
					Zm00001d036477	0.242728	0.00207899	UDP-sugar pyrophosphorylase		Zm00001d053119	0.293054	0.00265963	NA
					Zm00001d038151	0.918863	0.00212876	NA		Zm00001d006950	-0.846133	0.00265963	NA
					Zm00001d013741	0.188155	0.00216295	BTB/POZ domain-containing protein NPY2		Zm00001d023811	1.87618	0.00265963	Pathogenesis-related protein STH-21
					Zm00001d015201	0.493413	0.00219637	Protein NLP6		Zm00001d003974	0.15774	0.00284878	Phosphoenolpyruvate carboxylase family protein
					Zm00001d049770	1.06311	0.00222714	NA		Zm00001d045092	1.50984	0.00290611	Spermidine hydroxycinnamoyl transferase
					Zm00001d052488	0.311728	0.00223134	NA		Zm00001d010029	-0.111635	0.00296855	Cation-chloride cotransporter 1
					Zm00001d010287	-1.01663	0.00226369	WAT1-related protein		Zm00001d048577	-0.288264	0.00303658	Transmembrane amino acid transporter family protein
					Zm00001d004279	-0.605642	0.0023888	18-cineole synthase 1 chloroplastic		Zm00001d028203	-0.139538	0.00305077	NA
					Zm00001d014563	0.666228	0.00238979	Thaumatin-like protein		Zm00001d037745	-0.228471	0.00306734	Putative cytochrome P450 superfamily protein
					Zm00001d041645	-1.16649	0.00238979	NA		Zm00001d004635	-0.331469	0.0030739	Leucine-rich repeat protein kinase family protein
					Zm00001d004013	0.419692	0.00239891	OSJNBa0017B10.9 protein; protein		Zm00001d018705	0.411217	0.0030739	NA
					Zm00001d022450	-0.326235	0.00241313	CBL-interacting serine/threonine-protein kinase 10		Zm00001d031505	-0.194425	0.00314686	NA
					Zm00001d024471	-0.509303	0.00244513	NA		Zm00001d005250	-0.207226	0.00322257	Cellulose synthase A catalytic subunit 3 [UDP-forming]
					Zm00001d041611	1.11155	0.00246861	NA		Zm00001d016156	-0.299492	0.00322257	Putative callose synthase 8
					Zm00001d041173	0.628384	0.00257122	Beta-glucosidase 17		Zm00001d037313	-0.209071	0.00322257	Putative lysine-specific demethylase JMJ16
					Zm00001d007710	-0.492749	0.00261383	Major facilitator superfamily protein		Zm00001d053260	-0.37292	0.0032303	calcium-dependent lipid-binding family protein
					Zm00001d029762	-0.212244	0.00261427	Hexose transporter		Zm00001d004784	-0.194484	0.00323824	Protein TPLATE
					Zm00001d037636	-0.256444	0.00267172	Cellulose synthase-2%3B Cellulose synthase2		Zm00001d006297	0.702575	0.00801755	G-type lectin S-receptor-like serine/threonine-protein kinase B120
					Zm00001d048656	1.81172	0.00269001	Bowman-Birk type trypsin inhibitor		Zm00001d012909	0.53696	0.00324384	soluble epoxide hydrolase
					Zm00001d012383	-1.31987	0.00269644	NA		Zm00001d034754	-0.179898	0.0032966	DUF4378 domain protein
					Zm00001d006504	-0.139084	0.00272034	Microtubule-associated protein TORTIFOLIA1		Zm00001d011938	0.252459	0.0035707	NA
					Zm00001d053964	0.185633	0.00275912	NA		Zm00001d044845	-0.215329	0.0036345	binding
					Zm00001d018046	0.275888	0.00279161	Protein POLLEN DEFECTIVE IN GUIDANCE 1		Zm00001d004524	0.695473	0.00380405	NA
					Zm00001d031331	-1.29408	0.00279161	ankyrin repeat family protein		Zm00001d044212	0.139859	0.00382092	Probable aldo-keto reductase 4
					Zm00001d033457	-0.534315	0.00279161	Tubulin beta-3 chain		Zm00001d047911	-0.200314	0.00386564	HVA22-like protein i
					Zm00001d031769	-0.616109	0.002825	Nitrate reductase [NADH] 2		Zm00001d043922	0.290553	0.00388704	Auxin response factor 3
					Zm00001d048709	-1.25252	0.002825	benzoxazinless1		Zm00001d043512	0.663212	0.00389459	Protein kinase family protein with leucine-rich repeat domain
					Zm00001d018336	0.461753	0.00286381	Transmembrane amino acid transporter family protein		Zm00001d013873	-0.344984	0.00390356	Actin-2
					Zm00001d005980	0.254766	0.00287558	NA		Zm00001d009950	-0.121113	0.00390356	Heat shock 70 kDa protein 14
					Zm00001d028804	-0.225237	0.00297236	U2 small nuclear ribonucleoprotein B''		Zm00001d035229	-0.211838	0.00390356	Methyl-CpG-binding domain protein 4-like protein
					Zm00001d037945	0.4164	0.00297236	Putative RING zinc finger domain superfamily protein		Zm00001d039406	-0.280652	0.00390356	Receptor-like protein kinase
					Zm00001d017454	-0.654536	0.0029831	NA		Zm00001d042961	-0.283706	0.00390979	respiratory burst oxidase1
					Zm00001d017802	0.201219	0.0029831	Histidinol-phosphate aminotransferase 2 chloroplastic		Zm00001d021897	1.6164	0.00398598	L-type lectin-domain containing receptor kinase V.9
					Zm00001d042013	-0.393411	0.00300442	receptor-like protein kinase 1		Zm00001d020969	-0.225237	0.00414585	protein; Ternary complex factor-like
					Zm00001d016156	-0.334536	0.00300775	Putative callose synthase 8		Zm00001d012458	0.154531	0.00414585	SelT-like protein
					Zm00001d031700	-0.20929	0.00301916	NA		Zm00001d013325	0.249107	0.00416583	GLABRA2 expression modulator
					Zm00001d034049	-0.239299	0.00301916	Brittle stalk-2-like protein 3		Zm00001d036137	-0.176137	0.00416583	Palmitoyl-acyl carrier protein thioesterase chloroplastic
					Zm00001d011303	-0.949159	0.00304498	NA		Zm00001d036195	-0.150096	0.00416583	SNARE-like superfamily protein
					Zm00001d044734	-0.58192	0.00311486	U-box domain-containing protein 21		Zm00001d028824	0.358962	0.0041744	Probable galacturonosyltransferase-like 7
					Zm00001d045744	-0.133583	0.00313665	SMAD/FHA domain-containing protein		Zm00001d028820	-0.980059	0.00428474	Chaperone DnaJ-domain superfamily protein
					Zm00001d005036	-0.204334	0.0032184	Serine/threonine-protein kinase		Zm00001d050584	-0.160566	0.00431969	Protein MEI2-like 1
					Zm00001d017602	0.8673	0.0032184	NA		Zm00001d048903	0.491509	0.00432533	Acidic endochitinase
					Zm00001d003643	0.228621	0.00325802	L-ascorbate peroxidase S chloroplastic/mitochondrial		Zm00001d020840	0.30734	0.00432533	Fasciclin-like arabinogalactan protein 8
					Zm00001d042279	-0.196996	0.00325802	Probable beta-14-xylosyltransferase IRX10L		Zm00001d042096	0.619729	0.00432533	Glutathione S-transferase U16
					Zm00001d039529	0.603959	0.00328206	GDSL esterase/lipase		Zm00001d015559	0.468963	0.00432533	NA
					Zm00001d041818	-0.846402	0.00328206	Myb-like DNA-binding domain containing protein		Zm00001d034074	0.37073	0.00435498	starch phosphorylase1
					Zm00001d005535	0.378383	0.00334207	Bifunctional aspartokinase/homoserine dehydrogenase 2%2C chloroplastic Aspartokinase Homoserine dehydrogenase		Zm00001d040504	-0.611554	0.00448185	early nodulin-like protein 18
					Zm00001d042950	-0.158265	0.00335823	Lung seven transmembrane receptor family protein		Zm00001d047540	-0.187774	0.00450652	Guanine nucleotide exchange factor SPIKE 1
					Zm00001d036889	-1.37943	0.00337873	Putative AP2/EREBP transcription factor superfamily protein		Zm00001d048987	-0.589969	0.0045373	Expressed protein; protein
					Zm00001d029459	0.986077	0.00340085	Probable nucleoredoxin 1		Zm00001d043354	-0.188768	0.00457483	Zinc finger BED domain-containing protein DAYSLEEPER
					Zm00001d003897	-0.444549	0.00341776	RING finger protein		Zm00001d017864	0.625518	0.00460588	Aspartyl protease AED1
					Zm00001d002864	-0.168027	0.00350801	Probable polyol transporter 4		Zm00001d003497	0.299519	0.0046251	RING-H2 finger protein ATL54
					Zm00001d029820	0.461292	0.00352494	Cyclin-dependent protein kinase inhibitor SMR1		Zm00001d045843	1.5989	0.0046483	Aspartyl protease AED1
					Zm00001d019439	0.13858	0.00369505	Dehydrogenase/reductase SDR family member 2		Zm00001d013795	0.295526	0.00471242	Peroxisomal membrane 22 kDa (Mpv17/PMP22) family protein
					Zm00001d038127	-0.194472	0.00369505	Probable E3 ubiquitin-protein ligase LUL4		Zm00001d013705	0.366089	0.0047751	VAN3-binding protein
					Zm00001d025892	-0.373615	0.00374243	ATPase		Zm00001d026222	-0.250301	0.00481393	NA
					Zm00001d005995	0.420826	0.00377761	Phosphatidylinositol/phosphatidylcholine transfer protein SFH13		Zm00001d048959	0.179422	0.00492854	small basic membrane intrinsic protein1a
					Zm00001d038724	0.234388	0.00378076	Cyclic phosphodiesterase		Zm00001d040623	-1.11894	0.00493687	DUF3511 domain protein
					Zm00001d042578	-0.893083	0.00382306	barley mlo defense gene homolog5		Zm00001d037252	-0.242114	0.00493687	Putative LIM-type zinc finger domain family protein
					Zm00001d027351	-0.210323	0.00382391	Signal transducer		Zm00001d035753	0.875518	0.00493953	Polygalacturonase inhibitor
					Zm00001d029135	-1.52438	0.00382855	sugars will eventually be exported transporter12a		Zm00001d033556	-0.111551	0.00495392	Polygalacturonate 4-alpha-galacturonosyltransferase
					Zm00001d030094	-0.300068	0.00385069	Putative WEB family protein chloroplastic		Zm00001d021263	0.31695	0.00496513	Heat stress transcription factor B-2b
					Zm00001d043734	-0.556062	0.00385965	S-adenosyl-L-methionine-dependent methyltransferases superfamily protein		Zm00001d001828	-0.120459	0.00500893	Katanin p80 WD40 repeat-containing subunit B1 homolog
					Zm00001d040126	-0.525041	0.00386248	NA		Zm00001d016787	0.197504	0.0050445	SLL1 protein
					Zm00001d044290	0.201728	0.00386248	Beta-galactosidase 1		Zm00001d010832	-0.776075	0.00506439	Fasciclin-like arabinogalactan protein 11
					Zm00001d053977	-0.118097	0.00386248	NA		Zm00001d011331	0.263855	0.00509185	NA
					Zm00001d020974	-0.281726	0.00388407	Chitinase-like protein 1		Zm00001d035228	-0.209768	0.00509208	Methyl-CpG-binding domain protein 4-like protein
					Zm00001d029663	-0.216426	0.00388407	Pollen ankyrin-like protein		Zm00001d040029	0.510387	0.00514762	Bowman-Birk type wound-induced proteinase inhibitor WIP1
					Zm00001d032363	0.347859	0.00389411	Pirin-like protein 2		Zm00001d050944	0.150839	0.00520707	NA
					Zm00001d026370	-0.376856	0.00397027	Leucoanthocyanidin reductase		Zm00001d047351	0.290454	0.00529682	PLAC8 family protein
					Zm00001d052667	-0.551905	0.00400415	Nudix hydrolase 13 mitochondrial		Zm00001d042088	0.18746	0.00529682	Uridine 5'-monophosphate synthase
					Zm00001d036735	-0.469361	0.00403159	Protein kinase superfamily protein		Zm00001d005146	0.384213	0.00544572	PVR3-like protein
					Zm00001d035677	-0.37797	0.00408127	Putative RING zinc finger domain superfamily protein		Zm00001d025281	0.560032	0.00548766	Putative AP2/EREBP transcription factor superfamily protein
					Zm00001d003749	1.57032	0.0040893	Aluminum-activated malate transporter 8		Zm00001d048218	-0.156063	0.00550036	Probable mitochondrial adenine nucleotide transporter BTL2
					Zm00001d049657	0.587645	0.0040893	Glutathione S-transferase GST 26%3B Glutathione S-transferase GSTU6		Zm00001d021711	0.422964	0.00555539	NA
					Zm00001d008255	0.594003	0.00410494	Yucca6		Zm00001d004075	0.271314	0.00555929	Probable inactive purple acid phosphatase 27
					Zm00001d033528	-0.295626	0.00411376	Protein NRT1/ PTR FAMILY 2.9		Zm00001d033983	0.197721	0.00558179	Aluminium induced protein with YGL and LRDR motifs
					Zm00001d006820	0.669603	0.00413794	UDP-arabinopyranose mutase 3		Zm00001d011165	0.219292	0.00564462	DNA binding;DNA-directed RNA polymerases
					Zm00001d019447	0.224921	0.00413794	NA		Zm00001d020136	0.460388	0.00564726	WRKY74-superfamily of TFs having WRKY and zinc finger domains
					Zm00001d028829	0.634383	0.00413794	Calmodulin-binding protein 60 G		Zm00001d003581	1.52822	0.00569308	cytochrome P450 family 87 subfamily A polypeptide 6
					Zm00001d047301	0.642943	0.00414963	NA		Zm00001d030996	-0.105437	0.00569335	Inorganic H pyrophosphatase family protein
					Zm00001d002897	0.3464	0.00419149	peroxidase14		Zm00001d032476	-0.136048	0.00578201	Probable methyltransferase PMT18
					Zm00001d034248	0.597447	0.00420992	NA		Zm00001d000011	0.329663	0.00582334	glyoxalase I homolog
					Zm00001d013055	-0.207854	0.00452296	Vesicle-associated membrane protein 722		Zm00001d020886	1.48366	0.00583359	Aspartyl protease AED1
					Zm00001d019279	0.321491	0.00463455	Cytidine/deoxycytidylate deaminase family protein%3B Putative cytidine deaminase		Zm00001d029289	0.351745	0.00583439	Cytochrome P450 709B2
					Zm00001d023659	-0.389864	0.00467424	Auxin response factor 2		Zm00001d049624	0.299167	0.00591158	Magnesium transporter CorA-like family protein
					Zm00001d028399	-0.484823	0.00467424	Thaumatin-like protein 1		Zm00001d008722	0.571608	0.00599301	NA
					Zm00001d049851	0.452229	0.00467424	ACT domain-containing protein ACR4		Zm00001d049742	-0.743403	0.00602352	protein; Ternary complex factor-like
					Zm00001d051302	-0.318526	0.00467949	SAUR11-auxin-responsive SAUR family member		Zm00001d037810	0.421217	0.0060803	receptor-like protein kinase 4
					Zm00001d031667	-0.24624	0.00468167	Discolored-paralog2		Zm00001d035702	0.168803	0.0060803	V-type proton ATPase subunit c4
					Zm00001d053181	-0.312512	0.00468167	from the Czech 'roh' meaning 'corner'		Zm00001d001074	0.950409	0.0061036	NA
					Zm00001d049380	-0.518619	0.00476047	Putative aminotransferase class III superfamily protein		Zm00001d001075	0.948521	0.00621431	NA
					Zm00001d043267	-0.236867	0.004842	Probable 1-acyl-sn-glycerol-3-phosphate acyltransferase 4		Zm00001d037636	-0.252937	0.00621566	Cellulose synthase-2; Cellulose synthase2
					Zm00001d004737	-0.119134	0.0048663	Armadillo/beta-catenin-like repeat ; C2 calcium/lipid-binding domain (CaLB) protein		Zm00001d026528	-0.489687	0.00621566	Oligouridylate-binding protein 1C
					Zm00001d029285	-0.205147	0.004998	pyruvate dehydrogenase (lipoamide) kinase1		Zm00001d008585	0.523168	0.00627268	PR5-like receptor kinase
					Zm00001d049100	-0.133416	0.00501849	Target of Myb protein 1		Zm00001d019789	-0.102134	0.00634475	homolog of histone chaperone HIRA
					Zm00001d025977	0.236338	0.0050992	Metal-nicotianamine transporter YSL2		Zm00001d001076	0.947838	0.00634475	NA
					Zm00001d018326	-0.315343	0.00525108	MAP kinase kinase4		Zm00001d010632	0.334465	0.00635104	NA
					Zm00001d033909	0.641314	0.00525108	Expressed protein; protein		Zm00001d004691	1.05503	0.00641507	Serine carboxypeptidase-like 43
					Zm00001d047316	2.02566	0.00537715	Putative cytochrome P450 superfamily protein		Zm00001d010619	-0.307597	0.00644588	Zinc finger BED domain-containing protein DAYSLEEPER
					Zm00001d009167	0.701868	0.00540869	Polygalacturonase		Zm00001d009750	-0.152834	0.00646117	Chromatin modification-related protein EAF1 B
					Zm00001d010972	0.365023	0.00540869	Disease resistance protein RPM1		Zm00001d037393	0.212609	0.00652834	NA
					Zm00001d027281	0.73474	0.00540869	Expansin-B4		Zm00001d045563	-0.492901	0.00654741	dwarf plant3
					Zm00001d040730	-0.555385	0.00540869	GDSL esterase/lipase LIP-4		Zm00001d002146	0.425867	0.0066489	BTB/POZ domain-containing protein
					Zm00001d005394	-0.399207	0.005422	Fiber protein Fb34		Zm00001d023918	0.480189	0.00668137	Purple acid phosphatase 10
					Zm00001d046200	0.358171	0.00543343	NA		Zm00001d043335	-0.143492	0.00668476	Branched-chain-amino-acid aminotransferase 5 chloroplastic
					Zm00001d003861	-0.328505	0.00543495	Potassium high-affinity transporter		Zm00001d026141	-0.510184	0.0067366	NA
					Zm00001d018380	-0.258429	0.00543495	Two-component response regulator ARR12		Zm00001d022891	-0.635212	0.00681868	NA
					Zm00001d014818	0.575471	0.00548444	GDSL esterase/lipase		Zm00001d041456	-0.158529	0.00687785	26S proteasome non-ATPase regulatory subunit 11 homolog
					Zm00001d044655	-0.522284	0.00550931	LRR protein WM1.10		Zm00001d016760	0.981379	0.00687785	abscisic acid stress ripening6
					Zm00001d038581	-0.490095	0.00556319	NA		Zm00001d013830	0.531127	0.00687785	cytochrome P450 family 76 subfamily C polypeptide 7
					Zm00001d034874	-0.24083	0.00556529	Expressed in cucumber hypocotyls		Zm00001d018746	0.971484	0.00687785	NA
					Zm00001d020025	-0.46433	0.00565514	NA		Zm00001d040059	0.226199	0.006943	Glycosyltransferase family 61 protein
					Zm00001d044640	0.784217	0.00565514	Probable peptide/nitrate transporter		Zm00001d039319	0.117195	0.006943	GTP binding;GTP binding
					Zm00001d047507	0.772391	0.00565514	Putative RING zinc finger domain superfamily protein		Zm00001d007772	-0.179314	0.006943	RNA-binding (RRM/RBD/RNP motifs) family protein
					Zm00001d000640	0.797801	0.00569242	NA		Zm00001d036575	-0.849509	0.00694752	Putative ribosomal protein S4 (RPS4A) family protein
					Zm00001d052231	0.185667	0.00569242	Sec14p-like phosphatidylinositol transfer family protein		Zm00001d038795	0.161724	0.00703806	NA
					Zm00001d020903	-0.453154	0.00573348	Fasciclin-like arabinogalactan protein 7		Zm00001d024225	-0.142066	0.00709512	Histone-lysine N-methyltransferase ATXR3
					Zm00001d039032	0.5175	0.00573348	Putative WRKY DNA-binding domain superfamily protein		Zm00001d025414	0.341388	0.00716662	NA
					Zm00001d014820	1.0719	0.00575437	GDSL esterase/lipase		Zm00001d031005	-0.276928	0.00719529	Protein NETWORKED 1A
					Zm00001d004340	0.453503	0.00576355	Transmembrane amino acid transporter family protein		Zm00001d016396	0.79824	0.00748249	ABC transporter A family member 7
					Zm00001d051567	0.567649	0.00576355	alpha/beta-Hydrolases superfamily protein		Zm00001d046041	-0.279756	0.0075338	HEAT repeat-containing protein
					Zm00001d020732	0.923601	0.00576542	Probable carboxylesterase 2		Zm00001d004340	0.461315	0.00755938	Transmembrane amino acid transporter family protein
					Zm00001d028269	0.463057	0.00576542	ATP-dependent DNA helicase [Source:UniProtKB/TrEMBL;Acc:A0A1D6JU37]		Zm00001d025148	0.586222	0.00756218	NA
					Zm00001d050428	-0.396963	0.00589784	glyceraldehyde-3-phosphate deHaseN1		Zm00001d029515	-0.292226	0.0075737	ACT domain-containing protein ACR4
					Zm00001d026460	-0.209878	0.00592482	Probable beta-14-xylosyltransferase IRX14		Zm00001d025680	-0.156681	0.00762652	PI-PLC X domain-containing protein
					Zm00001d052989	0.276436	0.00592641	Cysteine-rich receptor-like protein kinase 6		Zm00001d029833	-0.128496	0.00762652	Tetratricopeptide repeat protein SKI3
					Zm00001d042376	0.825813	0.00593302	DUF506 family protein		Zm00001d010948	0.265381	0.00764392	liguleless4
					Zm00001d026457	0.769845	0.0059585	DNA topoisomerase 2		Zm00001d029388	1.9901	0.00764392	Metacaspase-3
					Zm00001d048053	-0.256016	0.0059585	Probable inactive receptor kinase		Zm00001d016185	-0.294225	0.00783418	Peroxidase 52
					Zm00001d032405	0.470116	0.00597548	Peroxidase 1		Zm00001d025360	1.34957	0.00783418	Probable F-box protein At1g60180
					Zm00001d032886	0.63996	0.00598615	Expansin-A11		Zm00001d042541	0.798654	0.00783642	lipoxygenase2
					Zm00001d037916	0.343027	0.00599515	thiamin diphosphokinase2		Zm00001d022350	0.380858	0.00783642	NA
					Zm00001d032823	1.01083	0.00601237	Glycine-rich cell wall structural protein 2		Zm00001d047329	0.220026	0.00783642	Transcriptional regulatory protein algP
					Zm00001d042096	0.413803	0.00608155	Glutathione S-transferase U16		Zm00001d040341	0.153017	0.00785972	Peroxiredoxin-2F mitochondrial
					Zm00001d004658	1.05005	0.00609466	NA		Zm00001d028749	-0.399914	0.00786916	Acyl-CoA N-acyltransferase with RING/FYVE/PHD-type zinc finger domain
					Zm00001d013022	-0.637477	0.00609466	(+)-neomenthol dehydrogenase		Zm00001d020930	0.138134	0.00790376	complex I subunit
					Zm00001d024781	-0.849519	0.00609466	Putative HLH DNA-binding domain superfamily protein		Zm00001d025834	0.339738	0.00790376	Inositol transporter 4
					Zm00001d052137	-0.471948	0.00629295	Probable tyrosine-protein phosphatase		Zm00001d004366	0.605363	0.00790629	UDP-glycosyltransferase 74B1
					Zm00001d007726	1.41196	0.00631775	3-hydroxyisobutyryl-CoA hydrolase 1		Zm00001d036740	0.364012	0.00792512	Sterile alpha motif (SAM) domain-containing protein
					Zm00001d034991	-0.367114	0.00638885	uncharacterized protein [Source:UniProtKB/TrEMBL;Acc:B6TI24]		Zm00001d047710	0.325427	0.00798024	NA
					Zm00001d008526	0.468376	0.00645204	Glycosyltransferase family 61 protein		Zm00001d032408	-0.377989	0.0293094	G-type lectin S-receptor-like serine/threonine-protein kinase B120
					Zm00001d021736	0.557298	0.00649906	Cellulose synthase-like protein D3		Zm00001d048108	-0.176602	0.0080232	NA
					Zm00001d040684	0.361251	0.00661365	Carboxylic ester hydrolase		Zm00001d047537	-0.256225	0.0080232	Transferase
					Zm00001d042367	-0.261717	0.00663751	Selenium-binding protein 3		Zm00001d015356	0.320925	0.00805347	4-hydroxyphenylpyruvate dioxygenase 1
					Zm00001d040252	-0.82027	0.00664977	NA		Zm00001d043873	-2.01525	0.00814803	Aldehyde oxidase GLOX1
					Zm00001d038101	-0.25306	0.00670616	NA		Zm00001d052157	0.181357	0.00820559	Remorin family protein
					Zm00001d019988	0.327714	0.00671632	Homoserine dehydrogenase		Zm00001d036246	0.640566	0.00822437	Atpob1
					Zm00001d036834	-0.373106	0.00695034	C globular stage isoform 1		Zm00001d025951	-0.141032	0.00822437	kinesin-related protein15
					Zm00001d013339	0.239884	0.00696606	Expressed protein; protein		Zm00001d012970	0.242225	0.00825963	Phosphatidylinositol N-acetyglucosaminlytransferase subunit P-related
					Zm00001d044162	0.511359	0.00697996	Probable WRKY transcription factor 71		Zm00001d026193	-0.154391	0.00825963	Putative WEB family protein chloroplastic
					Zm00001d003757	-0.646059	0.00716475	Bifunctional inhibitor/lipid-transfer protein/seed storage 2S albumin superfamily protein		Zm00001d029004	-0.129476	0.00827616	Guanine nucleotide exchange factor SPIKE 1
					Zm00001d022102	-0.450784	0.00724885	Expressed protein; protein		Zm00001d037367	-0.185629	0.00827616	O-fucosyltransferase family protein
					Zm00001d009567	-0.368516	0.00725177	Fasciclin-like arabinogalactan protein 7		Zm00001d030577	0.377148	0.00838669	Light-inducible protein CPRF-2
					Zm00001d020675	-0.470117	0.00741644	NA		Zm00001d009993	-0.426031	0.00850112	Plant-specific domain TIGR01568 family protein
					Zm00001d028386	-0.294632	0.0074165	Protein kinase superfamily protein		Zm00001d019043	0.35549	0.00850112	Receptor-like kinase-like
					Zm00001d033330	1.26401	0.00750307	Cyclin-D5-1		Zm00001d037497	-0.200461	0.00850112	Villin-1
					Zm00001d039882	-0.380602	0.00753137	NA		Zm00001d004763	0.477592	0.00865742	Probable glucan endo-13-beta-glucosidase A6
					Zm00001d044656	-0.349915	0.00753303	Leucine-rich repeat protein kinase family protein		Zm00001d015036	-0.217845	0.00867729	Rho-related protein from plants 9
					Zm00001d019149	-0.232084	0.00756748	cellulose synthase4		Zm00001d025401	1.10838	0.0087424	abscisic acid stress ripening5
					Zm00001d042534	-0.276885	0.00756748	RING/FYVE/PHD zinc finger superfamily protein		Zm00001d025920	0.489771	0.0087424	Putative lectin-like receptor protein kinase family protein
					Zm00001d050412	0.502862	0.00756748	Chorismate mutase 2		Zm00001d009964	-0.238708	0.0087424	Ras-related protein RABA6a
					Zm00001d019994	-0.621227	0.00762193	Fasciclin-like arabinogalactan protein 2		Zm00001d039907	0.961767	0.00881956	AP2/ERF and B3 domain-containing transcription repressor TEM1
					Zm00001d044267	0.334061	0.00762193	Glyoxylate/succinic semialdehyde reductase 2 chloroplastic		Zm00001d035440	0.274752	0.00881956	low temperature-induced protein15
					Zm00001d030938	-0.759461	0.00783263	Expressed protein; Os12g0594800 protein		Zm00001d018399	-0.181177	0.00881956	NA
					Zm00001d000556	1.17048	0.00786242	NA		Zm00001d027550	0.418277	0.00903901	NA
					Zm00001d027370	-0.640008	0.00792164	NA		Zm00001d037684	0.753008	0.00910555	NA
					Zm00001d052050	0.12848	0.00792164	Nudix hydrolase 3		Zm00001d036834	-0.316449	0.00912702	C globular stage isoform 1
					Zm00001d024155	0.263327	0.00798576	(DL)-glycerol-3-phosphatase 2		Zm00001d048050	0.826823	0.00912702	Glutamine synthetase3 isoform 1; Glutamine synthetase3 isoform 2
					Zm00001d048446	-0.581589	0.00804009	Putative AMP-dependent synthetase and ligase superfamily protein		Zm00001d036972	0.319292	0.00912702	Putative leucine-rich repeat receptor-like protein kinase family protein
					Zm00001d006286	-0.179781	0.008138	BZIP transcription factor		ENSRNA049476041	-0.683946	0.00913064	NA
					Zm00001d008753	-0.379887	0.00816566	Putative HLH DNA-binding domain superfamily protein		Zm00001d008993	0.136227	0.00953814	DUF4378 domain protein
					Zm00001d047796	-0.217804	0.00837868	Trifunctional UDP-glucose 46-dehydratase/UDP-4-keto-6-deoxy-D-glucose 35-epimerase/UDP-4-keto-L-rhamnose-reductase RHM2		Zm00001d043059	0.159246	0.00953814	Protein FATTY ACID EXPORT 3 chloroplastic
					Zm00001d034782	-0.318591	0.00843822	Ammonium transporter 2		Zm00001d044823	-0.248136	0.00972583	Beta-13-galactosyltransferase GALT1
					Zm00001d002473	-0.624678	0.00844335	DUF674 family protein		Zm00001d043762	0.425461	0.00974238	ABC transporter B family member 9
					Zm00001d029050	0.193645	0.00844335	Serine/threonine-protein kinase AtPK1/AtPK6		Zm00001d038355	-0.971129	0.00974238	BEL1-like homeodomain protein 9
					Zm00001d053782	0.287969	0.00845357	cytochrome P450 15		Zm00001d008067	0.725434	0.00974238	NA
					Zm00001d035337	-0.179393	0.0085427	GDP-L-galactose phosphorylase 1		Zm00001d014943	-0.14336	0.00974238	Protein transport protein SEC16B homolog
					Zm00001d047560	0.416467	0.0085427	Protein binding protein%3B Putative RING zinc finger domain superfamily protein isoform 1%3B Putative RING zinc finger domain superfamily protein isoform 2		Zm00001d051103	0.234525	0.00974784	Eukaryotic translation initiation factor 3 subunit E
					Zm00001d047797	-0.272485	0.0085427	UDP-glucuronic acid decarboxylase 5		Zm00001d011700	-0.169513	0.00974784	Protein kinase superfamily protein
					Zm00001d002917	-2.23062	0.00871348	RNA-binding region RNP-1		Zm00001d039607	0.927198	0.00974784	UDP-glycosyltransferase 75B1
					Zm00001d006454	-0.379085	0.00871348	Filament-like plant protein 3		Zm00001d023753	-0.580411	0.00975683	NA
					Zm00001d007962	0.466341	0.00871348	Myb-like DNA-binding domain%2C SHAQKYF class family protein		Zm00001d052684	-0.990262	0.00975683	O-methyltransferase ZRP4
					Zm00001d016463	0.238252	0.00871348	7-dehydrocholesterol reductase		Zm00001d047663	0.711693	0.00982227	Acetate/butyrate--CoA ligase AAE7 peroxisomal
					Zm00001d030379	0.290834	0.00871348	Deoxyribodipyrimidine photo-lyase		Zm00001d040960	-0.171631	0.00986898	Fimbrin-2
					Zm00001d044035	0.151106	0.00871348	Ketol-acid reductoisomerase chloroplastic		Zm00001d047079	-0.133275	0.00993627	G2484-1 protein
					Zm00001d044849	-0.44698	0.00871348	NA		Zm00001d017558	0.267298	0.0100861	NA
					Zm00001d011500	-0.2053	0.0087748	Putative ubiquitin-conjugating enzyme family isoform 1%3B Putative ubiquitin-conjugating enzyme family isoform 2%3B Putative ubiquitin-conjugating enzyme family isoform 3%3B Ubiquitin-conjugating enzyme E2-17 kDa 9		Zm00001d047382	0.229514	0.0100897	plasmacytoma 326 homolog
					Zm00001d031008	0.141342	0.00878849	Protein tesmin/TSO1-like CXC 4		Zm00001d051761	0.154871	0.0100918	Aspartyl protease APCB1
					Zm00001d052777	-0.282282	0.00898255	Late embryogenesis abundant (LEA) hydroxyproline-rich glycoprotein family		Zm00001d002850	0.24178	0.0100918	Elicitor-responsive protein 3
					Zm00001d009790	1.1152	0.00900242	Alpha-L-arabinofuranosidase 1		Zm00001d010446	0.996698	0.0100918	Endoglucanase 6
					Zm00001d013346	0.236346	0.00904554	Growth-regulating factor 2		Zm00001d009891	0.391943	0.0100918	NA
					Zm00001d021329	0.97641	0.00908002	Agmatine coumaroyltransferase		Zm00001d048453	-0.244442	0.0100918	Putative leucine-rich repeat transmembrane protein kinase family protein
					Zm00001d014340	-0.0772635	0.0090953	Whole genome shotgun sequence of line PN40024 scaffold_7.assembly12x (Fragment)		Zm00001d022576	0.773461	0.0100918	SNF2 domain-containing protein CLASSY 1
					Zm00001d011975	-0.181762	0.00915608	ENTH/VHS family protein		Zm00001d028769	0.720928	0.0100918	tetratricopeptide repeat (TPR)-containing protein
					Zm00001d028363	-0.304217	0.0091936	65-kDa microtubule-associated protein 6		Zm00001d038087	0.253866	0.0101743	dwarf & irregular leaf1
					Zm00001d022456	-0.758033	0.00919819	Peroxidase 42		Zm00001d028419	0.53177	0.0102663	cytochrome P450 family 76 subfamily C polypeptide 7
					Zm00001d006293	-0.399387	0.00930214	NIN-like protein 1		Zm00001d047325	0.634129	0.0103011	Expressed protein; protein
					Zm00001d017965	0.412729	0.00938401	MACPF domain-containing protein		Zm00001d048417	0.575814	0.0103011	FAD/NAD(P)-binding oxidoreductase family protein
					Zm00001d009608	-0.226451	0.0094545	3-ketoacyl-CoA synthase		Zm00001d052180	-0.49717	0.0103154	tunicate1
					Zm00001d038352	0.828898	0.0094545	NA		Zm00001d024321	0.161315	0.0103351	B3 domain-containing protein
					Zm00001d044643	0.753555	0.0094545	NA		Zm00001d034618	0.179682	0.0103582	Protein FLC EXPRESSOR
					Zm00001d046168	-0.314143	0.0094545	Arogenate dehydrogenase 1 chloroplastic		Zm00001d035835	0.530605	0.0103926	Putative AP2/EREBP transcription factor superfamily protein
					Zm00001d048513	0.413329	0.0094545	Copper transport protein family		Zm00001d002437	-1.47395	0.0105457	NA
					Zm00001d011396	-0.288909	0.0096396	GTPase activating protein%3B Putative calcium-dependent lipid-binding (CaLB domain) family protein		Zm00001d044368	0.869451	0.0108317	Acyl-CoA N-acyltransferases (NAT) superfamily protein
					Zm00001d000508	0.362302	0.00969012	NA		Zm00001d040603	-0.123395	0.0108393	ATP-citrate synthase beta chain protein 2
					Zm00001d011919	-0.316437	0.00973556	Src2-like protein		Zm00001d035527	-0.16937	0.0109027	protein; Unknow protein
					Zm00001d020362	-0.899386	0.00973556	Catalytic/ hydrolase		Zm00001d051589	-0.237748	0.0109027	Tetratricopeptide repeat (TPR)-like superfamily protein
					Zm00001d010976	-0.29353	0.00979411	Probable beta-14-xylosyltransferase IRX9		Zm00001d051288	0.473362	0.0109027	Vesicle-associated protein 1-1
					Zm00001d039973	0.167053	0.00996701	Plastidic glucose transporter 4		Zm00001d050164	0.455724	0.0109027	Wall-associated receptor kinase-like 20
					Zm00001d003099	-0.346579	0.00999746	Serinc-domain containing serine and sphingolipid biosynthesis protein		Zm00001d026515	0.0952608	0.0109926	Molybdopterin biosynthesis protein CNX1
					Zm00001d012909	0.375636	0.0100167	soluble epoxide hydrolase		Zm00001d014036	-0.146	0.0109926	Probable methyltransferase PMT3
					Zm00001d013335	0.154575	0.0100167	Endoplasmic reticulum oxidoreductin-1		Zm00001d007254	-0.281807	0.0181307	Leucine-rich repeat receptor-like serine/threonine-protein kinase BAM3
					Zm00001d013367	-0.293018	0.0100167	Tubulin alpha-4 chain		Zm00001d010443	-0.150163	0.0111546	Protein trichome birefringence-like 26
					Zm00001d006088	3.10496	0.0100556	Shaggy-related protein kinase alpha		Zm00001d028770	-0.285426	0.0111825	Protein kinase superfamily protein
					Zm00001d025005	-0.44373	0.0100556	Yucca2		Zm00001d025407	0.185375	0.0111913	COP9 signalosome complex subunit 8
					Zm00001d024783	-1.18702	0.0100907	Putative HLH DNA-binding domain superfamily protein		Zm00001d004592	-0.765411	0.0112452	NA
					Zm00001d024916	-0.613821	0.0101182	UNC93-like protein 2		Zm00001d001905	0.325943	0.0113287	OSJNBa0043A12.20 protein
					Zm00001d025917	-0.376369	0.0101182	Probable galacturonosyltransferase-like 3		Zm00001d048584	0.337597	0.0113673	Thioesterase family protein
					Zm00001d039315	-0.347155	0.0101457	P-loop containing nucleoside triphosphate hydrolases superfamily protein		Zm00001d047781	-0.157575	0.0113799	phosphoinositide binding
					Zm00001d051787	-0.478135	0.0101576	3-ketoacyl-CoA synthase		Zm00001d003182	0.329279	0.0114478	NA
					Zm00001d038897	0.485448	0.0105424	Short-chain dehydrogenase/reductase SDRA		Zm00001d008635	0.793731	0.0114478	Probable carboxylesterase 15
					Zm00001d017658	-0.780341	0.0106908	NA		Zm00001d007885	0.535465	0.011553	Glutaredoxin family protein
					Zm00001d044823	-0.210776	0.0106908	Beta-13-galactosyltransferase GALT1		Zm00001d007577	0.129645	0.011553	Transducin/WD40 repeat-like superfamily protein
					Zm00001d001432	-0.305477	0.0107909	NA		Zm00001d000196	0.670904	0.0115763	Putative MATE efflux family protein
					Zm00001d005583	-1.14644	0.0108644	NA		Zm00001d016100	0.328043	0.0115763	Rhodanese-like domain-containing protein 4 chloroplastic
					Zm00001d013052	-0.191562	0.0109345	Hydroxyproline O-galactosyltransferase GALT4		Zm00001d028798	0.742428	0.0115968	NA
					Zm00001d051898	-0.137429	0.0109345	Serine/threonine-protein phosphatase PP1		Zm00001d031164	2.20851	0.011712	Transcription factor JUNGBRUNNEN 1
					Zm00001d002712	-0.584351	0.0109549	MDIS1-interacting receptor like kinase 2		Zm00001d016220	0.570919	0.031226	LRR receptor-like serine/threonine-protein kinase RCH1
					Zm00001d039702	-0.16342	0.0109549	O-fucosyltransferase family protein		Zm00001d053696	0.225038	0.0118643	Glucomannan 4-beta-mannosyltransferase 2
					Zm00001d002333	0.506712	0.0110217	Potassium transporter 10		Zm00001d018521	0.170976	0.0118643	NA
					Zm00001d033044	0.641705	0.0110217	GDSL esterase/lipase		Zm00001d018374	0.332857	0.0120216	Transcription factor bHLH69
					Zm00001d037968	0.516755	0.0110217	PAR1 protein		Zm00001d046039	-0.153396	0.0121483	HEAT repeat-containing protein
					Zm00001d006640	-0.228204	0.0110487	O-fucosyltransferase family protein		Zm00001d018313	0.908721	0.0122469	NA
					Zm00001d011831	-0.123004	0.0110829	MACPF domain-containing protein		Zm00001d054008	-0.19455	0.0122799	Mevalonate kinase
					Zm00001d031805	-0.24263	0.0111779	Gibberellin receptor GID1L2		Zm00001d026942	-0.340289	0.0122947	NA
					Zm00001d002035	0.464492	0.0112561	Endonuclease 2		Zm00001d018407	0.329757	0.0122947	NA
					Zm00001d034839	0.359327	0.0112561	Purple acid phosphatase 15		Zm00001d032407	-0.247246	0.0123036	FAD binding domain containing protein
					Zm00001d000040	-0.223982	0.0112802	alpha/beta-Hydrolases superfamily protein		Zm00001d048461	0.176165	0.0123323	blue fluorescent1
					Zm00001d002803	2.17665	0.0112802	Brittle stalk-2-like protein 9		Zm00001d031077	0.942951	0.0123323	Cation/H(+) antiporter 19
					Zm00001d043923	0.263866	0.0112802	PAN domain-containing protein		Zm00001d033595	-0.951273	0.0123323	Lipid transfer protein
					Zm00001d005841	-0.640439	0.0112931	Transcription factor HEC2		Zm00001d012514	-0.224519	0.0123323	Probable inactive receptor kinase
					Zm00001d007745	-0.805253	0.0112931	S-receptor kinase1		Zm00001d040527	-0.437745	0.0123323	Transcription factor MYB86
					Zm00001d034725	-0.864392	0.0112931	Haloacid dehalogenase-like hydrolase (HAD) superfamily protein		Zm00001d038728	-0.219449	0.0123323	trehalose-6-phosphate synthase12
					Zm00001d041827	0.89689	0.0113019	Peroxidase superfamily protein		Zm00001d025134	-0.106123	0.0124347	Protein TRANSPARENT TESTA 9
					Zm00001d012996	0.354079	0.0113502	KH domain-containing protein SPIN1		Zm00001d038290	0.102412	0.0125592	sec23/sec24 transport family protein
					Zm00001d029884	0.340092	0.0113502	Ethylene-responsive transcription factor ERF035		Zm00001d034990	0.21782	0.0125882	Pectin lyase-like superfamily protein
					Zm00001d033187	0.263309	0.0113502	Glycerophosphoryl diester phosphodiesterase		Zm00001d043667	-0.184095	0.0126908	Myosin family protein with Dil domain
					Zm00001d028718	-1.67971	0.0115039	Hydrophobic protein RCI2B		Zm00001d011854	-0.159663	0.0127936	Villin-2
					Zm00001d031047	-0.655902	0.0115082	CASP-like protein 2		Zm00001d008679	-0.138534	0.0129481	Nucleotide/sugar transporter family protein
					Zm00001d048108	-0.202745	0.0115785	NA		Zm00001d035475	0.553594	0.0129586	Isovaleryl-CoA dehydrogenase mitochondrial
					Zm00001d006663	0.75105	0.0117493	light harvesting complex A1		Zm00001d024927	-0.468119	0.0130258	RING/U-box superfamily protein
					Zm00001d013468	-0.407174	0.0117899	Protein FAF-like chloroplastic		ENSRNA049478262	-2.46407	0.0130467	NA
					Zm00001d025748	1.59668	0.0117908	Protein NRT1/ PTR FAMILY 4.2		Zm00001d028649	0.538428	0.0130483	Embryogenesis transmembrane protein-like; protein
					Zm00001d020371	-0.262088	0.0117915	Endoglucanase 11		Zm00001d042685	0.172052	0.0130483	glutamate-oxaloacetate transaminase4
					Zm00001d044385	-0.918481	0.0117915	protein; Ribosomal RNA apurinic site specific lyase-like		Zm00001d029356	0.829144	0.0131021	benzoxazinone synthesis11
					Zm00001d015427	0.173754	0.0119755	V-type proton ATPase catalytic subunit A		Zm00001d027589	0.24884	0.0131021	Expressed protein; protein
					Zm00001d028410	1.2618	0.0119755	Glucan endo-13-beta-glucosidase 10		Zm00001d028778	-0.544682	0.0131021	NA
					Zm00001d051563	-0.210625	0.0120042	Ornithine carbamoyltransferase chloroplastic		Zm00001d008847	-0.086003	0.0131021	nucleosome/chromatin assembly factor D110
					Zm00001d006308	-0.379025	0.0120383	Protein kinase superfamily protein		Zm00001d027685	0.258415	0.0131261	RING-H2 finger protein ATL16
					Zm00001d012159	-0.392286	0.0120513	Beta-glucosidase 42		Zm00001d053781	0.508095	0.0132044	NA
					Zm00001d026377	0.679102	0.0120513	Organic cation/carnitine transporter 4		Zm00001d019299	0.106777	0.0132044	Protein CIA1
					Zm00001d039701	-0.347689	0.0120513	alpha/beta-Hydrolases superfamily protein		Zm00001d028775	-0.497993	0.0132044	Thioredoxin superfamily protein
					Zm00001d040292	0.314983	0.0120513	Protein induced upon tuberization		Zm00001d045721	0.300819	0.0132044	TRICHOME BIREFRINGENCE-LIKE 20
					Zm00001d014617	-1.51935	0.0120519	Xyloglucan endotransglucosylase/hydrolase protein 14		Zm00001d051917	-0.333641	0.0132865	Phosphatidylinositol N-acetyglucosaminlytransferase subunit P-related
					Zm00001d015059	-0.473021	0.0120564	UTP:RNA uridylyltransferase 1		Zm00001d031636	0.420514	0.0133379	Lipid transfer protein
					Zm00001d033320	0.289526	0.012085	UDP-glycosyltransferase 91A1		Zm00001d027633	-0.167177	0.0136282	Protein PIR
					Zm00001d005951	-0.334492	0.0121405	Homeobox-leucine zipper protein ATHB-6		Zm00001d026344	0.26736	0.0136969	myosin heavy chain-related
					Zm00001d035501	-0.15083	0.0121685	Tetraspanin-3		Zm00001d027534	0.393756	0.0137086	Probable acyl-activating enzyme 1 peroxisomal
					Zm00001d048181	-0.565924	0.0121685	Chloroplast 30S ribosomal protein S10		Zm00001d038453	0.454479	0.0138378	Putative aminotransferase class III superfamily protein
					Zm00001d021135	-1.78568	0.0122097	phosphatidylethanolamine-binding protein24		Zm00001d018211	0.45381	0.0139192	1-aminocyclopropane-1-carboxylate oxidase35
					Zm00001d026501	0.397994	0.0122234	Glutamine synthetase leaf isozyme chloroplastic		Zm00001d051928	0.366952	0.0140673	Glutathione S-transferase family protein
					Zm00001d021793	-0.437349	0.0127989	Protein REDUCED WALL ACETYLATION 2		Zm00001d044074	-0.536934	0.0141285	Zinc finger CCCH domain-containing protein 14
					Zm00001d043178	-0.238117	0.0128319	Probable sugar phosphate/phosphate translocator		Zm00001d025247	0.720232	0.0141521	Beta-13-N-Acetylglucosaminyltransferase family protein
					Zm00001d015032	0.512435	0.0129439	Serine/threonine-protein kinase STY46		Zm00001d008987	-0.550839	0.0141521	Putative cytochrome P450 superfamily protein
					Zm00001d018788	0.838541	0.0129439	Patatin-like protein 6		Zm00001d051329	-0.457784	0.0141521	Vesicle-associated protein 2-1
					Zm00001d034954	-0.128821	0.0129439	Pleckstrin homology (PH) domain-containing protein		Zm00001d045516	-0.201956	0.014183	Probable transcriptional regulator SLK2
					Zm00001d017383	-0.360873	0.012972	myb domain protein 19		Zm00001d021487	0.465788	0.0141959	receptor-like protein kinase 4
					Zm00001d028565	-0.29074	0.0130774	NA		Zm00001d014340	-0.113437	0.0141959	Whole genome shotgun sequence of line PN40024 scaffold_7.assembly12x (Fragment)
					Zm00001d009134	0.352049	0.0131617	Probable sarcosine oxidase		Zm00001d033751	-0.133096	0.0142253	Dynamin-related protein 1C
					Zm00001d009506	-0.488158	0.0131724	Cytochrome b561 and DOMON domain-containing protein		Zm00001d022264	-0.380639	0.0142253	proteolipid membrane potential regulator5
					Zm00001d023753	-0.661681	0.0131724	NA		Zm00001d026467	1.02802	0.0142268	Luminal-binding protein 2
					Zm00001d026577	0.362334	0.0131724	Probable cysteine protease RD21B		Zm00001d016810	-0.286255	0.0143846	DNAJ heat shock N-terminal domain-containing protein
					Zm00001d052067	0.879803	0.0131724	Protein kinase protein with adenine nucleotide alpha hydrolases-like domain		Zm00001d021730	0.174047	0.0143846	USP family protein
					Zm00001d033917	-0.232813	0.013212	Endo-1%2C4-beta-glucanase Cel1		Zm00001d007790	0.299696	0.0144804	Receptor-like kinase-like
					Zm00001d025709	0.578339	0.0132309	NA		Zm00001d022198	0.317165	0.0144941	SAP domain-containing protein
					Zm00001d024750	-0.747087	0.0132646	Peroxidase 64		Zm00001d051839	-0.11599	0.0145063	ARM repeat superfamily protein
					Zm00001d044915	-0.183994	0.0133248	NA		Zm00001d016121	0.571756	0.0145198	NA
					Zm00001d035651	-0.242093	0.0134078	DNA binding with one finger3		Zm00001d037205	0.459068	0.0148913	Protein EXORDIUM
					Zm00001d020108	0.212336	0.0134089	Galactose mutarotase-like superfamily protein		Zm00001d012880	0.201484	0.0150088	BTB/POZ domain-containing protein
					Zm00001d008866	-0.513464	0.013561	NA		Zm00001d010195	0.163909	0.0150088	Protein NRT1/ PTR FAMILY 5.10
					Zm00001d018260	0.506778	0.0135753	Growth-regulating factor 6		Zm00001d041800	-0.379492	0.0150828	BTB/POZ domain-containing protein
					Zm00001d020343	-0.211904	0.0136035	Probable acyl-activating enzyme 17 peroxisomal		Zm00001d044538	-0.530982	0.0151695	NA
					Zm00001d014947	-0.888001	0.0136316	Beta-fructofuranosidase 1%3B Invertase		Zm00001d028542	0.108566	0.0151695	Peroxisomal nicotinamide adenine dinucleotide carrier
					Zm00001d034896	-0.086548	0.0136316	AKINbetagamma-1 protein kinase		Zm00001d025003	-0.139545	0.0151695	Putative glycosyl transferase family 28 protein
					Zm00001d048533	-0.340165	0.0136316	Cyclin-dependent protein kinase inhibitor EL2		Zm00001d000099	-0.19875	0.0152338	Beta-13-galactosyltransferase 7
					Zm00001d051005	0.371219	0.0136316	Remorin family protein		Zm00001d018560	-0.21087	0.0152338	Callose synthase 3
					Zm00001d039177	-0.529689	0.0136642	Polygalacturonase inhibitor 1		Zm00001d033989	-0.713038	0.0152338	HXXXD-type acyl-transferase family protein
					Zm00001d004372	-0.163726	0.0137598	ethylene receptor homolog40		Zm00001d017713	0.938991	0.0152338	Protein NRT1/ PTR FAMILY 8.3
					Zm00001d032155	-0.396246	0.0137808	CBL-interacting serine/threonine-protein kinase 15		Zm00001d018500	0.761468	0.0152515	ABC transporter G family member 24
					Zm00001d053566	-0.404897	0.0137808	Probable protein phosphatase 2C 72		Zm00001d020936	0.243594	0.0153257	NA
					Zm00001d021528	0.498527	0.0138994	MATH domain containing protein; Os10g0478500 protein		Zm00001d040028	0.882957	0.0153298	NA
					Zm00001d010616	1.11716	0.0139032	Putative WRKY DNA-binding domain superfamily protein		Zm00001d031071	0.139801	0.0153547	albino or pale green mutant1
					Zm00001d033209	0.24417	0.0139032	Cupredoxin superfamily protein		Zm00001d033479	0.151858	0.015429	Signal peptidase complex subunit 1
					Zm00001d047276	-0.469526	0.0139448	brittle stalk2		Zm00001d023646	0.326358	0.0154597	Pumilio homolog 12
					Zm00001d048601	-0.295497	0.0142651	GRAS transcription factor [Source:UniProtKB/TrEMBL;Acc:K7U8D1]		Zm00001d018179	0.166318	0.0154597	Remorin family protein
					Zm00001d045203	0.657097	0.0143026	Auxin-responsive protein IAA29		Zm00001d030806	-0.53496	0.0155073	NA
					Zm00001d017755	0.309174	0.0144225	Rop guanine nucleotide exchange factor 14		Zm00001d003469	0.886677	0.0155202	Sugar transport protein 5
					Zm00001d012488	0.631783	0.0144227	Major facilitator superfamily protein		Zm00001d053262	-0.191008	0.0157435	calcium-dependent lipid-binding family protein
					Zm00001d004467	-0.330192	0.0144603	Yucca4		Zm00001d043915	-0.144647	0.0157435	Homeobox-DDT domain protein RLT1
					Zm00001d045427	-0.498145	0.0145302	barren stalk fastigiate1		Zm00001d014752	0.259073	0.0157779	NA
					Zm00001d007631	0.546315	0.0145677	NA		Zm00001d021469	-0.326039	0.0158002	Glutathione S-transferase F9
					Zm00001d054066	-0.263524	0.0145954	Glycosyltransferase family 61 protein		Zm00001d031310	0.217832	0.0158002	Nuclear transcription factor Y subunit C-2
					Zm00001d023424	-0.3643	0.0146171	Putative bZIP transcription factor superfamily protein		Zm00001d050550	0.164217	0.0158002	Polyprotein
					Zm00001d038796	0.129676	0.0146171	ATP-dependent protease La (LON) domain protein		Zm00001d015780	-0.117519	0.0158002	Protein WVD2-like 5
					Zm00001d041817	-0.355935	0.0146171	NA		Zm00001d038012	-0.107812	0.0158854	DUF538 family protein
					Zm00001d032401	-0.704984	0.0146182	Serine/threonine kinase-like protein		Zm00001d047617	-0.161054	0.0160237	Chloroplast protein HCF243
					Zm00001d044599	0.297634	0.0146275	Nonphototropic hypocotyl 1		Zm00001d015599	0.320191	0.0161509	Cyclase family protein
					Zm00001d036673	-0.210885	0.0146464	RING/FYVE/PHD zinc finger superfamily protein		Zm00001d039718	-0.149092	0.0162519	Mini-chromosome maintenance complex-binding protein
					Zm00001d023217	-0.177537	0.0147443	Protein ESKIMO 1		Zm00001d041827	0.479317	0.0162519	Peroxidase superfamily protein
					Zm00001d002475	0.218905	0.0147545	Binding partner of ACD11 1		Zm00001d049333	-0.164089	0.0163641	Alba DNA/RNA-binding protein
					Zm00001d004348	-1.16885	0.0148248	Natterin-4		Zm00001d012929	0.415606	0.0163641	Receptor protein kinase TMK1
					Zm00001d041692	0.130117	0.0148248	Acyl-CoA-binding domain-containing protein 4		Zm00001d046311	-0.758205	0.0165991	NA
					Zm00001d018064	-1.19613	0.0149224	Laccase-14		Zm00001d011602	-0.197162	0.0167908	evolutionarily conserved C-terminal region 8
					Zm00001d028475	-0.150654	0.0149535	Probable E3 ubiquitin-protein ligase LOG2		Zm00001d012899	0.382848	0.0168643	Cell number regulator 9
					Zm00001d052033	0.551733	0.0149535	OSJNBb0045P24.5 protein		Zm00001d025921	0.221093	0.0169476	L-type lectin-domain containing receptor kinase V.9
					Zm00001d026293	0.291887	0.015014	Gamma-aminobutyrate transaminase POP2 mitochondrial		Zm00001d032655	-0.642199	0.0171185	dicer-like 102
					Zm00001d042747	-0.255348	0.015014	Serine/threonine-protein kinase Nek5		Zm00001d007401	0.322214	0.0173019	Encodes alpha-helical IF (intermediate filament)-like protein.
					Zm00001d035934	-0.276991	0.0150649	NA		Zm00001d043773	-0.293992	0.0173891	Putative clathrin assembly protein
					Zm00001d024867	-0.755223	0.0150865	OSJNBb0040D15.7 protein		Zm00001d025777	-0.163362	0.0175356	Eukaryotic translation initiation factor isoform 4G-2
					Zm00001d003996	0.510964	0.0150963	myosin heavy chain-related		Zm00001d035978	-0.579315	0.0175615	NA
					Zm00001d009985	-0.770293	0.0151062	Polcalcin Jun o 2		Zm00001d012819	0.450771	0.0177585	Protein SRG1
					Zm00001d017952	-0.725911	0.0151062	ABA-induced protein		Zm00001d034250	-0.176002	0.0179871	Probable methyltransferase PMT28
					Zm00001d029264	-0.134757	0.0151088	CDPK-related kinase 1		Zm00001d006453	0.251949	0.0180033	Protein LAZ1
					Zm00001d041656	-0.714936	0.0151088	Jasmonate-induced protein		Zm00001d020043	0.494491	0.0180394	Ethylene-responsive transcription factor ERF117
					Zm00001d035246	-0.471761	0.0151343	Taxadien-5-alpha-ol O-acetyltransferase		Zm00001d003679	0.123518	0.0180394	Histone-lysine N-methyltransferase ASHH1
					Zm00001d005010	-0.437167	0.0151698	Late embryogenesis abundant (LEA) hydroxyproline-rich glycoprotein family		Zm00001d044091	-0.191572	0.0180569	MAP kinase kinase kinase55
					Zm00001d018794	0.136653	0.0152168	Ferredoxin--NADP reductase		Zm00001d013251	-0.113633	0.0444574	LRR receptor-like serine/threonine-protein kinase RPK2
					Zm00001d011720	0.250586	0.0152671	violaxanthin de-epoxidase3		Zm00001d003269	0.240234	0.0181307	NA
					Zm00001d027431	-0.327028	0.0152671	knotted related homeobox1		Zm00001d052523	0.279648	0.0181307	Protein kinase superfamily protein
					Zm00001d027802	-0.250865	0.01528	BEL1-like homeodomain protein 3		Zm00001d045338	0.365342	0.0181801	HXXXD-type acyl-transferase family protein
					Zm00001d007301	0.332826	0.0153774	protein disulfide isomerase2		Zm00001d036387	0.190194	0.0181801	plant/F20M13-60 protein
					Zm00001d024982	0.603328	0.0153859	Stress responsive protein		Zm00001d029516	-0.21638	0.0182109	Probable galacturonosyltransferase 11
					Zm00001d039837	0.236216	0.0153859	Spermidine hydroxycinnamoyl transferase		Zm00001d009010	-0.68518	0.0184528	Plasma membrane-associated cation-binding protein 1
					Zm00001d006128	-0.133895	0.0154978	3beta-hydroxysteroid-dehydrogenase/decarboxylase isoform 3		Zm00001d028129	0.705437	0.018465	grassy tillers1
					Zm00001d038784	-0.368172	0.015627	Auxin-responsive protein IAA26		Zm00001d043166	0.543597	0.0185515	UDP-glycosyltransferase 87A1
					Zm00001d023918	0.433054	0.0157136	Purple acid phosphatase 10		Zm00001d041214	-0.357504	0.0186224	ATPase 4 plasma membrane-type
					Zm00001d027091	0.838129	0.0157136	NA		Zm00001d003778	0.266783	0.0187187	ABC transporter B family member 29 chloroplastic
					Zm00001d011076	-0.311043	0.0157177	Putative RING zinc finger domain superfamily protein		Zm00001d037937	0.225152	0.0188947	DUF538 family protein
					Zm00001d028720	0.524462	0.0157177	Phosphatidylinositol transfer protein expressed		Zm00001d006355	-0.190519	0.0190138	Protein kinase superfamily protein
					Zm00001d050872	-0.903736	0.0157177	loricrin-related		ENSRNA049478307	-0.9198	0.0191111	NA
					Zm00001d013769	0.675884	0.0158578	Expressed protein; protein		Zm00001d003051	0.696983	0.0191111	OSJNBb0070J16.14 protein; OSJNBb0072M01.10 protein; protein
					Zm00001d017801	0.186165	0.0158578	Formate dehydrogenase chloroplastic/mitochondrial		Zm00001d012338	0.262071	0.0191828	Coronatine-insensitive protein 1
					Zm00001d000307	-0.216414	0.0159066	NA		Zm00001d032223	0.55441	0.0192076	Gibberellin 20 oxidase 2
					Zm00001d045513	-0.265812	0.0159758	BAG family molecular chaperone regulator 1		Zm00001d012569	1.01899	0.0192802	NA
					Zm00001d043367	-0.283962	0.0160577	NA		Zm00001d020213	0.108398	0.0192802	Probable receptor-like protein kinase
					Zm00001d002669	0.281123	0.016074	BZIP transcription factor		Zm00001d024531	-0.244789	0.0194902	Putative cellulose synthase-like family protein
					Zm00001d033061	0.53241	0.0161944	Protein DETOXIFICATION 40		Zm00001d025789	-0.163589	0.0195565	NA
					Zm00001d036366	0.818307	0.0161944	Basic endochitinase B		Zm00001d040245	0.856002	0.0195565	Putative serine type endopeptidase inhibitor
					Zm00001d009628	0.547429	0.0163056	DNA binding protein%3B Putative MADS-box transcription factor family protein		Zm00001d010997	-0.151213	0.0196209	protein; Unknow protein
					Zm00001d036283	-0.338556	0.0164752	Late embryogenesis abundant protein group 2		Zm00001d018365	-0.128788	0.0196722	AUGMIN subunit 8
					ENSRNA049997031	1.35568	0.0164786	NA		Zm00001d028412	-0.147017	0.0197192	Filament-like plant protein 4
					Zm00001d002071	0.53694	0.0164786	DNA topoisomerase 2		Zm00001d024995	0.413633	0.0197447	Expressed protein; protein
					Zm00001d019180	0.320316	0.0164786	Nudix hydrolase 16 mitochondrial		Zm00001d026242	1.03425	0.0197627	NA
					Zm00001d025862	-0.32002	0.0164786	L-allo-threonine aldolase%3B Putative threonine aldolase family protein		Zm00001d030652	-0.121759	0.0197628	Calmodulin-binding protein MPCBP
					Zm00001d032854	-0.559875	0.0164786	Peroxidase 59		Zm00001d029359	0.465793	0.0197943	benzoxazinone synthesis10
					zma-MIR399e	1.35568	0.0164786	NA		Zm00001d026287	-0.309296	0.0197943	UDP-N-acetylglucosamine diphosphorylase 2
					Zm00001d002246	0.133049	0.0165039	polyketide synthesis homolog1		Zm00001d039608	-0.119298	0.019854	Enhancer of polycomb-like transcription factor protein
					Zm00001d038476	0.652161	0.0165039	alpha expansin5		Zm00001d046200	0.25863	0.019854	NA
					Zm00001d007728	1.49799	0.0165041	3-hydroxyisobutyryl-CoA hydrolase 1		Zm00001d007789	0.551896	0.019854	receptor-like protein kinase 4
					Zm00001d012281	-0.537593	0.0165041	Protein YLS9		Zm00001d048829	0.312728	0.019854	Remorin family protein
					Zm00001d031705	0.242718	0.0165041	Haloacid dehalogenase-like hydrolase (HAD) superfamily protein		Zm00001d036715	0.330868	0.019854	Transmembrane 9 superfamily member 9
					Zm00001d016072	0.239661	0.0165865	50S ribosomal protein L21 chloroplastic		Zm00001d030217	-0.0855409	0.019854	Whole genome shotgun sequence of line PN40024 scaffold_7.assembly12x (Fragment)
					Zm00001d039007	-0.227842	0.0169549	E3 SUMO-protein ligase MMS21		Zm00001d051178	-0.125455	0.0198631	NA
					Zm00001d003544	0.476882	0.0172357	Protein LURP-one-related 6		Zm00001d003495	0.310075	0.0198631	NA
					Zm00001d034383	-0.163375	0.0175217	Putative membrane localized peptidase		Zm00001d003190	0.740289	0.0198942	Endochitinase A
					Zm00001d044184	-0.217125	0.0175735	Protein ABIL1		Zm00001d009541	-0.119244	0.0200553	Golgin candidate 5
					Zm00001d017199	0.650266	0.0175856	Temperature-induced lipocalin-1		Zm00001d008874	-0.157729	0.0200623	NA
					Zm00001d039088	-1.08697	0.0176571	Phospholipase A1-IIgamma		Zm00001d019259	0.464869	0.0200801	UDP-glycosyltransferase 76C1
					Zm00001d010690	-0.753461	0.017821	Anthocyanidin 3-O-glucosyltransferase		Zm00001d018130	-0.358378	0.0201184	Protein CURVATURE THYLAKOID 1D chloroplastic
					Zm00001d018716	0.367793	0.0179	Galactoside 2-alpha-L-fucosyltransferase		Zm00001d035157	0.362747	0.0201292	Lysine histidine transporter 2
					Zm00001d049706	0.141491	0.0179677	KH domain-containing protein		Zm00001d028213	-0.0923647	0.0202145	histone-lysine N-methyltransferases
					Zm00001d047776	-0.150542	0.0180297	Phosphatidylinositol N-acetyglucosaminlytransferase subunit P-related		Zm00001d032333	0.257264	0.0202514	Phosphoglucan phosphatase LSF1 chloroplastic
					Zm00001d000099	-0.230338	0.0181509	Beta-13-galactosyltransferase 7		Zm00001d026258	-0.146596	0.020315	Ubiquitin-specific protease family C19-related protein
					Zm00001d020773	-0.342045	0.0181884	FIP1		Zm00001d007035	0.330922	0.0204681	NA
					Zm00001d029771	-0.323933	0.0182918	KH domain-containing protein		Zm00001d039141	-0.207338	0.0205747	Mitogen-activated protein kinase 20
					Zm00001d040941	0.159093	0.0183814	Chaperone protein dnaJ 50		Zm00001d019754	0.139384	0.0206584	Short-chain dehydrogenase TIC 32 chloroplastic
					Zm00001d001061	-0.728182	0.0185421	NA		Zm00001d043681	-0.406144	0.0207214	Polyamine oxidase, Polyamine catabolis ""
					Zm00001d006708	-0.212222	0.0185707	C2 domain containing protein		Zm00001d047092	-0.150641	0.0207214	ARF guanine-nucleotide exchange factor GNOM
					Zm00001d023437	-0.253752	0.0185707	glycine decarboxylase1		Zm00001d027365	0.267091	0.0207214	ARM repeat superfamily protein
					Zm00001d031994	0.746259	0.0185707	NA		Zm00001d020537	-0.156853	0.0207214	opaque endosperm5
					Zm00001d024633	0.443318	0.0185907	Monodehydroascorbate reductase 5 mitochondrial		Zm00001d035263	0.750559	0.0208666	Probable protein phosphatase 2C 30
					Zm00001d026636	-0.459	0.0185907	Isoamyl acetate-hydrolyzing esterase%3B Isoamyl acetate-hydrolyzing esterase-like protein		ENSRNA049478207	-1.07495	0.0211098	NA
					Zm00001d047889	0.390421	0.0185907	NA		Zm00001d052387	0.825386	0.0211762	Expressed protein; protein
					Zm00001d030676	-0.299231	0.0186735	UNC93-like protein 3		Zm00001d013809	0.403879	0.0211762	Protein DETOXIFICATION 40
					Zm00001d031725	-0.267414	0.0188901	Transcription factor TCP9		Zm00001d053158	-0.19198	0.0347087	Probable serine/threonine-protein kinase WNK6
					Zm00001d011426	-0.187143	0.0188926	Putative MAP kinase family protein		Zm00001d012957	0.410004	0.0213777	Expansin-A6
					Zm00001d022380	-0.294155	0.0188926	Glycosyltransferase family 61 protein		Zm00001d022305	-0.247611	0.0213966	CDPK-related kinase 1
					Zm00001d026296	0.231452	0.0188926	Trypsin family protein		Zm00001d039826	0.674428	0.0213966	NA
					Zm00001d048994	-1.33321	0.0188954	NA		Zm00001d016461	0.660523	0.0213966	Protein SMAX1-LIKE 4
					Zm00001d027041	-0.290068	0.0189169	NA		Zm00001d046591	-0.193159	0.0214022	vacuolar-type H+-pyrophosphatase5
					Zm00001d019479	0.377757	0.0194372	granule-bound starch synthase1b		Zm00001d035069	-2.30548	0.0214673	Putative cytochrome P450 superfamily protein
					Zm00001d044744	-0.26873	0.0194789	Endoglucanase 11		Zm00001d006364	0.635073	0.0215433	Probable cysteine protease RD19D
					Zm00001d007478	-0.696697	0.0195258	NA		Zm00001d017391	0.999293	0.0216659	Axial regulator YABBY 1
					Zm00001d022347	0.263629	0.0195422	Probable protein phosphatase 2C 35		Zm00001d030676	0.429603	0.02176	UNC93-like protein 3
					Zm00001d046652	-0.265544	0.0197366	F11F12.5 protein		Zm00001d011288	0.157177	0.0218507	Protein kinase protein with adenine nucleotide alpha hydrolases-like domain
					Zm00001d048020	0.557619	0.0197764	hemoglobin1		Zm00001d005666	1.1435	0.0218507	Pumilio homolog 12
					Zm00001d005001	0.247209	0.0197774	transporter of mugineic acid3		Zm00001d047531	-0.361013	0.0117393	Putative AGC-like protein kinase family protein isoform 1; Putative AGC-like protein kinase family protein isoform 2; Putative AGC-like protein kinase family protein isoform 3; Serine/threonine-protein kinase AtPK19
					Zm00001d028051	-0.447063	0.0197774	ARM-repeat/Tetratricopeptide repeat (TPR)-like protein		Zm00001d010442	1.29488	0.0218555	Putative wall-associated receptor protein kinase family protein
					Zm00001d046945	-0.273298	0.0198065	Vacuolar sorting receptor 7		Zm00001d025823	-0.901625	0.0219273	Putative MYB DNA-binding domain superfamily protein
					Zm00001d013644	-0.255349	0.019904	5-methyltetrahydropteroyltriglutamate--homocysteine methyltransferase 1		Zm00001d022092	0.54747	0.0219726	Cytosolic sulfotransferase 17
					Zm00001d017886	-0.350471	0.019904	Nucleotide/sugar transporter family protein		Zm00001d044604	0.333002	0.0263554	Putative serine/threonine-protein kinase-like protein CCR3
					Zm00001d045327	-0.212889	0.019904	Pyridoxal-5'-phosphate-dependent enzyme family protein		Zm00001d021386	1.24973	0.0219726	Zinc finger protein 2
					Zm00001d013319	-0.319807	0.0199309	Endoglucanase 25		Zm00001d051754	0.367937	0.0220067	aldehyde dehydrogenase2
					Zm00001d018699	0.694786	0.0200591	NA		Zm00001d002071	0.507316	0.0220273	DNA topoisomerase 2
					Zm00001d028267	-0.154397	0.0201915	trehalose-6-phosphate synthase2		Zm00001d010693	-0.356995	0.022033	21.7 kDa class VI heat shock protein
					Zm00001d037092	-1.60261	0.0202094	terpene synthase26		Zm00001d001852	-0.940595	0.022033	Gibberellin-regulated protein 2
					Zm00001d022453	-0.773942	0.0202458	Peroxidase 52		Zm00001d006534	0.361972	0.022033	NA
					Zm00001d008209	1.77936	0.0202658	Peptidyl-prolyl cis-trans isomerase		Zm00001d052890	-0.328345	0.022033	Squamosa promoter-binding-like protein 15
					ENSRNA049997226	-1.25321	0.0203271	NA		Zm00001d037298	1.44983	0.022033	UDP-glycosyltransferase 84A1
					Zm00001d008987	-0.555136	0.0203271	Putative cytochrome P450 superfamily protein		Zm00001d041801	-0.816065	0.0220464	D8Ertd354e protein
					Zm00001d025418	-0.892629	0.0203271	WAT1-related protein		Zm00001d021950	-0.13061	0.0221207	RNA-binding (RRM/RBD/RNP motifs) family protein
					Zm00001d052157	0.27523	0.0203271	Remorin family protein		Zm00001d040228	0.762012	0.0221207	Sarcosine oxidase
					zma-MIR156a	-1.25321	0.0203271	NA		Zm00001d016363	0.291995	0.022154	CASP-like protein 12
					Zm00001d049055	-0.498601	0.0203322	Serine carboxypeptidase F13S12.6		Zm00001d017964	0.326598	0.0223878	Putative RNA-dependent RNA polymerase
					Zm00001d049303	-0.686639	0.0203322	O-methyltransferase ZRP4		Zm00001d004568	0.153268	0.022461	60 kDa jasmonate-induced protein
					Zm00001d023145	0.23892	0.0203762	NA		Zm00001d033629	0.818565	0.022461	NA
					Zm00001d023410	0.632577	0.0203762	Probable purple acid phosphatase 20		Zm00001d042627	-0.204905	0.0224684	UDP-glucuronate:xylan alpha-glucuronosyltransferase 1
					Zm00001d032887	-0.848952	0.0203762	Protein binding protein		Zm00001d022506	0.319174	0.0225495	NAD(P)-binding Rossmann-fold superfamily protein
					Zm00001d006516	-0.755503	0.0203875	Harpin-induced protein		Zm00001d025674	0.268952	0.0227196	Probably inactive leucine-rich repeat receptor-like protein kinase
					Zm00001d025861	-0.672948	0.0204148	NAC domain containing protein 74		Zm00001d039526	-0.137352	0.0229945	AGC (cAMP-dependent cGMP-dependent and protein kinase C) kinase family protein
					Zm00001d037619	-0.342833	0.0204148	10-deacetylbaccatin III 10-O-acetyltransferase		Zm00001d045102	0.31235	0.0230826	Formin-like protein 18
					Zm00001d040155	0.183207	0.0204148	Protein EXECUTER 2 chloroplastic		Zm00001d022405	-0.107412	0.0230826	Protein CHROMATIN REMODELING 5
					Zm00001d050708	0.165259	0.0204148	Transducin/WD40 repeat-like superfamily protein		Zm00001d012712	0.595383	0.0232459	gibberellin 2-oxidase10
					Zm00001d042365	-0.23856	0.0204152	CRP7 - Cysteine-rich family protein precursor expressed		Zm00001d022050	0.145559	0.0233007	RNA-binding (RRM/RBD/RNP motifs) family protein
					Zm00001d028755	0.217725	0.0204506	Ran-binding protein 1 homolog a		Zm00001d025661	-0.395054	0.0233399	NA
					Zm00001d051677	-0.113751	0.0204506	KH domain-containing protein		Zm00001d033496	1.32404	0.0233399	nicotianamine synthase 3
					Zm00001d012433	-0.218917	0.0204589	UDP-glucuronic acid decarboxylase 1		Zm00001d010703	-0.131997	0.0233399	Secretory carrier-associated membrane protein 3
					Zm00001d008878	-0.346395	0.0205341	DNA-binding WRKY		Zm00001d008179	0.350082	0.0234769	NA
					Zm00001d017729	-0.186899	0.0206062	Serine/threonine-protein kinase MHK		Zm00001d052625	0.272741	0.0238133	Glycosyltransferase 6
					Zm00001d013113	-0.307039	0.0206255	Expp1 protein		Zm00001d002966	0.256583	0.0238734	Serine carboxypeptidase-like 35
					Zm00001d032604	0.169575	0.0206255	WAT1-related protein chloroplastic		Zm00001d021719	0.154978	0.0240717	Probable proteasome inhibitor
					Zm00001d053401	-0.10783	0.0206255	Cyclic nucleotide-gated ion channel 1 isoform 1%3B Cyclic nucleotide-gated ion channel 1 isoform 2		Zm00001d028114	0.446655	0.0242809	no pollen germination related 1
					Zm00001d035040	-0.117175	0.0206396	Putative ARM repeat-containing protein containing family protein isoform 1%3B Putative ARM repeat-containing protein containing family protein isoform 2%3B Putative ARM repeat-containing protein containing family protein isoform 3		Zm00001d039901	-0.124302	0.0242986	NA
					Zm00001d005762	0.117471	0.0206813	alpha/beta-Hydrolases superfamily protein		Zm00001d036642	0.202152	0.0242986	Zinc-binding protein
					Zm00001d025645	0.728438	0.0206818	NA		Zm00001d043503	-0.813973	0.0243353	downstream target of AGL15-4
					Zm00001d047063	0.246315	0.0207178	camphor resistance CrcB family protein		Zm00001d002479	1.40227	0.0243353	S-norcoclaurine synthase
					Zm00001d041362	0.387896	0.0207379	resistance to Puccinia sorghi3		Zm00001d046397	0.599606	0.0244066	NA
					Zm00001d043071	-0.342694	0.0208389	Probable inactive receptor kinase		Zm00001d028802	-0.131856	0.0244906	NA
					Zm00001d009702	-0.20142	0.0208409	P-loop containing nucleoside triphosphate hydrolases superfamily protein		Zm00001d031873	-0.207147	0.0244906	Ribonuclease E/G-like protein chloroplastic
					Zm00001d013105	-0.965914	0.0209012	Calcium-dependent protein kinase 20		Zm00001d017140	1.63773	0.0246817	GDSL esterase/lipase
					Zm00001d006872	0.14912	0.0209078	NA		Zm00001d003087	-0.120495	0.0247237	CLIP-associated protein
					Zm00001d048694	-1.82153	0.0209078	NA		Zm00001d034770	-0.124151	0.0247435	Cellulose synthase-6
					Zm00001d011959	-0.337813	0.0209299	Secondary cell wall glycosyltransferase family 47		Zm00001d017476	-0.106743	0.0247435	Chaperone protein dnaJ 3
					Zm00001d012665	-0.141195	0.0209299	BSD domain-containing protein		Zm00001d034769	0.987578	0.0247435	cytochrome P450 family 722 subfamily A polypeptide 1
					Zm00001d018601	-0.82205	0.0209299	Laccase-7		Zm00001d018333	-0.164307	0.0247435	Diacylglycerol kinase
					Zm00001d021626	0.139134	0.0209299	Reactive Intermediate Deaminase A chloroplastic		Zm00001d043898	0.966505	0.0247435	NA
					Zm00001d030019	0.145791	0.0209299	NA		Zm00001d029856	0.210971	0.0247435	NADH dehydrogenase [ubiquinone] 1 beta subcomplex subunit 8 mitochondrial
					Zm00001d039686	-0.124982	0.0209299	NA		Zm00001d023931	-0.490283	0.0247435	Putative MYB DNA-binding domain superfamily protein; Secondary wall MYB46 transcription factor
					Zm00001d044422	0.125436	0.0209299	NA		Zm00001d039300	-0.213145	0.0247435	Transcription factor bHLH133
					Zm00001d019934	-0.228738	0.02094	O-Glycosyl hydrolases family 17 protein		Zm00001d044283	-0.172374	0.0247597	Chromatin modification-related protein EAF1 B
					Zm00001d013139	-0.248343	0.0209618	Tubulin beta-4 chain		Zm00001d023459	-0.209691	0.0247597	HVA22-like protein j
					Zm00001d016529	0.461533	0.0209618	NA		Zm00001d042410	0.187861	0.0247597	NA
					Zm00001d032311	0.35183	0.0209618	trehalose-6-phosphate synthase4		Zm00001d034727	-0.149653	0.0247597	Pectin lyase-like superfamily protein
					Zm00001d021824	-0.319874	0.0210261	NA		Zm00001d053674	-0.129657	0.0247597	Tubulin binding cofactor C domain-containing protein
					Zm00001d047638	-0.402942	0.0210304	Calcium-dependent phosphotriesterase superfamily protein		Zm00001d028988	0.491862	0.0248594	Phospholipid-transporting ATPase 1
					Zm00001d051589	-0.265117	0.0210304	Tetratricopeptide repeat (TPR)-like superfamily protein		Zm00001d037916	0.276848	0.0248594	thiamin diphosphokinase2
					Zm00001d025973	0.292119	0.0210846	NA		Zm00001d032459	0.286349	0.0249477	cytochrome P450 family 87 subfamily A polypeptide 6
					Zm00001d052367	-0.188908	0.0211318	Cytochrome P450 714A1		Zm00001d029594	0.253608	0.0250841	allene oxide cyclase1
					Zm00001d035444	0.286981	0.0211767	NA		Zm00001d022378	-0.0948616	0.0251067	Protein transport protein SEC31 homolog B
					Zm00001d029416	0.169218	0.0214063	Probable acetyl-CoA acetyltransferase cytosolic 2		Zm00001d009810	-0.163122	0.02526	Core-2/I-branching beta-16-N-acetylglucosaminyltransferase family protein
					Zm00001d000967	-0.424565	0.0214437	NA		Zm00001d008789	-0.127881	0.02526	NA
					Zm00001d031014	-0.143925	0.0214437	MAP kinase kinase kinase51		Zm00001d024105	-1.28278	0.0253138	Retrotransposon protein SINE subclass
					Zm00001d018752	-0.219403	0.0215761	Leucine-rich repeat receptor-like serine/threonine-protein kinase BAM1		Zm00001d030935	-0.173497	0.0254025	NA
					Zm00001d002295	-0.887686	0.0216164	Germin-like protein subfamily 1 member 11		Zm00001d025043	0.290129	0.0254394	ABC transporter C family member 4
					ENSRNA049997541	1.02682	0.0218804	NA		Zm00001d044274	-0.132688	0.0254394	DENN domain and WD repeat-containing protein SCD1
					Zm00001d024518	0.193545	0.0218804	Acyl-CoA-binding protein1		Zm00001d016542	0.343663	0.0254394	FAD/NAD(P)-binding oxidoreductase
					Zm00001d026567	0.809099	0.0218804	NA		Zm00001d011526	0.150927	0.0254394	pfkB-like carbohydrate kinase family protein
					zma-MIR399j	1.02682	0.0218804	NA		Zm00001d032425	-1.08177	0.0254394	Replication protein-like
					Zm00001d051814	-0.427297	0.0219338	Endoglucanase 11		Zm00001d004921	0.981554	0.0254998	benzoxazinone synthesis14
					Zm00001d022308	0.139273	0.0219686	NA		Zm00001d028366	0.350043	0.0255857	Type IV inositol polyphosphate 5-phosphatase 9
					Zm00001d010576	0.17493	0.022049	Haloacid dehalogenase-like hydrolase (HAD) superfamily protein		Zm00001d041236	0.548459	0.0257573	Leucine-rich receptor-like protein kinase family protein
					Zm00001d010975	-0.209587	0.022049	IQ-domain 3		Zm00001d023262	-0.123484	0.0257946	brick3
					Zm00001d013507	0.502717	0.0220614	Heat shock 70 kDa protein 6 chloroplastic		Zm00001d012482	0.98581	0.0258377	Putative WRKY DNA-binding domain superfamily protein
					Zm00001d053530	1.77445	0.0220614	Cwf21		Zm00001d002147	0.267835	0.0258822	NA
					Zm00001d005497	0.190611	0.0220795	UDP-Glycosyltransferase superfamily protein		Zm00001d022457	1.12506	0.0258822	peroxidase3
					Zm00001d021332	-0.104212	0.0220795	Peptidyl-prolyl cis-trans isomerase CYP21-4		Zm00001d002069	0.292783	0.0260889	DNA topoisomerase 2
					Zm00001d018986	-0.134336	0.0221795	Protein WVD2-like 3		Zm00001d044621	0.162319	0.0260889	NA
					Zm00001d002534	0.376824	0.0225224	Protein S-acyltransferase 21		Zm00001d016237	1.13487	0.0260889	NOD26-like membrane intrinsic protein1
					Zm00001d047781	-0.145783	0.0225519	phosphoinositide binding		Zm00001d029648	1.8951	0.0261655	copalyl diphosphate synthase2
					Zm00001d053065	0.447513	0.0225863	MLO-like protein 4		Zm00001d003002	0.408851	0.0262389	IAA-amino acid hydrolase ILR1-like 3
					Zm00001d029555	-0.132633	0.0227257	Ubiquitin-fusion protein		Zm00001d010406	-0.187232	0.0262389	Minichromosome maintenance protein
					Zm00001d029047	-0.177818	0.0227973	Receptor-like protein kinase FERONIA		Zm00001d043607	0.177978	0.0262657	hexokinase6
					Zm00001d007767	-0.142551	0.0228648	Vesicle-associated membrane protein 722		Zm00001d052627	0.585199	0.0263038	Glycosyltransferase 6
					Zm00001d031732	-0.416534	0.0229375	BAG family molecular chaperone regulator 1		Zm00001d022531	0.260849	0.0263038	Triphosphate tunel metalloenzyme 3
					Zm00001d034884	-0.223494	0.0229452	Putative gamma-glutamylcyclotransferase		Zm00001d006714	0.0868342	0.0263079	NADH dehydrogenase [ubiquinone] iron-sulfur protein 4 mitochondrial
					Zm00001d045208	-0.248773	0.0229452	PIF / Ping-Pong family of plant transposases		Zm00001d013934	0.19895	0.0263079	soluble epoxide hydrolase
					Zm00001d002391	-0.131871	0.0229641	Ubiquitin-specific protease family C19-related protein		Zm00001d008924	0.490779	0.0263554	FON2 SPARE1
					Zm00001d029546	0.431135	0.022985	Metallothionein-like protein 1		Zm00001d053082	-0.189366	0.0326473	Receptor-like serine/threonine-protein kinase SD1-6
					Zm00001d040789	-0.137287	0.022985	RING/U-box superfamily protein		Zm00001d002105	0.131018	0.0263554	V-type proton ATPase subunit D
					Zm00001d043121	-0.649019	0.0230426	Osmotin-like protein OSM34		Zm00001d020366	0.311282	0.0265512	NA
					Zm00001d014719	-0.170623	0.0231251	Putative pentatricopeptide repeat-containing protein		Zm00001d037569	-1.06822	0.0265533	Putative HLH DNA-binding domain superfamily protein
					Zm00001d002018	0.876179	0.0232116	Os07g0120600 protein		Zm00001d001896	0.209607	0.0265984	Probable phytol kinase, chloroplastic""
					Zm00001d010832	-1.18157	0.0232171	Fasciclin-like arabinogalactan protein 11		Zm00001d034793	0.132217	0.0265984	NA
					Zm00001d019712	-0.330604	0.0232171	Sucrose responsive element binding protein		Zm00001d021830	-0.168305	0.0267004	NA
					Zm00001d022617	0.376748	0.0232171	NA		Zm00001d042717	0.675541	0.02683	Ethylene-responsive transcription factor ABR1
					Zm00001d023580	0.523662	0.0232171	Aldehyde dehydrogenase		Zm00001d029093	-0.143755	0.02683	Tetratricopeptide repeat (TPR)-like superfamily protein
					Zm00001d028770	-0.29506	0.0232171	Protein kinase superfamily protein		Zm00001d031995	0.182155	0.0268823	Dihydroneopterin aldolase 2
					Zm00001d034198	-0.177358	0.0232171	Protein PHLOEM PROTEIN 2-LIKE A10		Zm00001d049816	-0.385297	0.02694	65-kDa microtubule-associated protein 8
					Zm00001d032563	0.684229	0.0232425	NA		Zm00001d014345	-0.828524	0.0270085	C2H2-like zinc finger protein
					Zm00001d032143	-1.62129	0.0235785	Histone-lysine N-methyltransferase ASHR3		Zm00001d032819	-0.116636	0.0270085	calcium ion binding
					Zm00001d017888	0.330138	0.023639	Calcium-dependent protein kinase 14		Zm00001d024940	0.190616	0.0270085	Zinc finger (C3HC4-type RING finger) family protein
					Zm00001d027330	-0.496516	0.023639	Remorin		Zm00001d048245	1.16149	0.0270732	Leucine-rich repeat (LRR) family protein
					Zm00001d029965	-0.177072	0.023639	Peptide methionine sulfoxide reductase		Zm00001d031267	0.337708	0.0271304	Aldolase-type TIM barrel family protein
					Zm00001d053393	-0.297748	0.023639	Core-2/I-branching beta-16-N-acetylglucosaminyltransferase family protein		Zm00001d009780	-0.152305	0.0271304	gamma-tubulin1
					Zm00001d009631	0.669717	0.0236845	CTP synthase family protein		Zm00001d036678	-0.338252	0.0271304	Protein STRUBBELIG-RECEPTOR FAMILY 1
					Zm00001d021891	-0.325886	0.023912	Tubulin alpha-6 chain		Zm00001d024781	-0.659857	0.0271304	Putative HLH DNA-binding domain superfamily protein
					Zm00001d029653	0.160709	0.023912	methyltransferases;copper ion binding		Zm00001d002668	-0.312196	0.0271304	root hair specific 17
					Zm00001d028474	0.351942	0.0239564	Beta-galactosidase		Zm00001d014126	0.488101	0.0271304	UDP-glycosyltransferase 86A2
					Zm00001d001999	0.207609	0.0239672	Galactose mutarotase-like superfamily protein		Zm00001d029569	-1.39749	0.0271922	NA
					Zm00001d017958	-0.26167	0.0239672	Glutamine synthetase root isozyme 3		Zm00001d029134	-0.337986	0.0272964	CW-type Zinc Finger
					Zm00001d022284	-0.725701	0.0241026	Peroxidase 64		Zm00001d053055	-0.23026	0.0272964	Dirigent protein 23
					Zm00001d031959	-0.832667	0.0241269	Fatty acyl-CoA reductase 1		Zm00001d014945	0.754045	0.0273553	Lactate/malate dehydrogenase family protein
					Zm00001d002441	-0.45872	0.024179	P-loop containing nucleoside triphosphate hydrolases superfamily protein		Zm00001d012982	-0.812905	0.0273553	NAD(P)-binding Rossmann-fold superfamily protein
					Zm00001d002052	-0.699913	0.0245182	Probable isoaspartyl peptidase/L-asparaginase 2		Zm00001d047165	0.442902	0.0273855	NA
					Zm00001d021221	-0.29327	0.0245788	Protein binding protein		Zm00001d013532	0.246217	0.0274036	Defense-related protein
					Zm00001d026661	-0.956747	0.0245881	Transcription repressor OFP13		Zm00001d043504	-0.135422	0.027413	P-loop nucleoside triphosphate hydrolases superfamily protein with CH (Calponin Homology) domain
					Zm00001d037974	-0.234391	0.0246145	PIT1		Zm00001d024925	-0.398468	0.0276207	NA
					Zm00001d028372	-0.110105	0.024671	bZIP transcription factor 16		Zm00001d008495	0.503796	0.0276251	Glycosyltransferase family 61 protein
					Zm00001d038223	0.461369	0.0247656	Bzip transcription factor-like; protein		Zm00001d046231	-0.121151	0.0276251	K(+) efflux antiporter 4
					Zm00001d021506	0.134333	0.0247984	beta alanine synthase1		Zm00001d045618	0.108529	0.0276616	Bax inhibitor 1
					Zm00001d041744	0.589598	0.0248445	Protein cornichon homolog 1		Zm00001d053394	0.365557	0.0276616	NA
					Zm00001d011212	-0.505738	0.0250922	Putative HLH DNA-binding domain superfamily protein		Zm00001d046915	-0.211773	0.0276616	Putative AMP-dependent synthetase and ligase superfamily protein
					Zm00001d014785	0.149933	0.0250922	translocon-associated protein homolog1		Zm00001d053786	0.143095	0.027743	cytoplasmic membrane protein
					Zm00001d013595	-0.273607	0.0251944	Protein MARD1		Zm00001d047638	0.483735	0.0278227	Calcium-dependent phosphotriesterase superfamily protein
					Zm00001d044660	0.440727	0.0253592	NA		Zm00001d029012	-0.222007	0.0278227	Leucine-rich repeat protein kinase family protein
					Zm00001d010662	0.807785	0.025418	SNF1-related protein kinase regulatory subunit beta-1		Zm00001d016170	0.171577	0.0278227	Peroxisome biogenesis protein 7
					Zm00001d035166	-0.343796	0.0254818	Lysine histidine transporter 2		Zm00001d036024	-0.148208	0.0278863	aldo/keto reductase AKR1
					Zm00001d019597	-0.180978	0.0255291	Fiber protein Fb34		Zm00001d038089	-0.184829	0.0278863	Major facilitator superfamily protein
					Zm00001d017186	-0.233672	0.0257523	Shikimate O-hydroxycinnamoyltransferase		Zm00001d019312	0.754159	0.0279348	beta glucosidase aggregating factor1
					Zm00001d003180	0.27813	0.0257834	Probable transcription factor PosF21		Zm00001d026535	-0.217187	0.0279684	Protein IQ-DOMAIN 32
					Zm00001d011551	-0.633264	0.0259095	PAN domain-containing protein		Zm00001d012586	0.702878	0.0280162	NA
					Zm00001d028837	-0.28964	0.0259095	Anaphase-promoting complex subunit 11		Zm00001d048111	-0.291233	0.0280162	Plant calmodulin-binding protein-related
					Zm00001d030967	-0.210621	0.0259095	Ureidoglycolate hydrolase		Zm00001d022360	-0.294848	0.0281616	DEAD-box ATP-dependent RNA helicase 57
					Zm00001d047983	-0.0949861	0.0259095	LisH and RanBPM domains containing protein		Zm00001d040513	-0.175567	0.0282214	NA
					Zm00001d032375	0.143852	0.025947	NA		Zm00001d014351	0.847569	0.0282569	NA
					Zm00001d024364	-0.177738	0.0261611	Cysteine-type endopeptidase/ ubiquitin thiolesterase		Zm00001d005004	-0.16946	0.0284015	Protein kinase superfamily protein
					Zm00001d044535	-0.444446	0.0261636	WAT1-related protein		Zm00001d042837	0.391206	0.0284015	UPF0503 protein chloroplastic
					Zm00001d014258	0.381197	0.0261653	alanine aminotransferase5		Zm00001d021286	0.449938	0.0284492	Protein kinase superfamily protein
					Zm00001d000589	0.407598	0.0263411	NA		Zm00001d023248	0.688181	0.0284492	Scarecrow-like protein 3
					Zm00001d029093	-0.136479	0.0264938	Tetratricopeptide repeat (TPR)-like superfamily protein		Zm00001d018871	0.191882	0.0284721	C2 calcium/lipid-binding plant phosphoribosyltransferase family protein
					Zm00001d023238	0.171524	0.0265107	Long chain acyl-CoA synthetase 6 peroxisomal		Zm00001d006313	0.573309	0.0284721	NA
					Zm00001d038178	-0.642808	0.0265271	Probable carboxylesterase 17		Zm00001d024049	-0.11914	0.0284721	NA
					Zm00001d038878	-0.40476	0.0265271	Transcription factor MYB86		Zm00001d004094	0.565094	0.0289061	Protein SMAX1-LIKE 4
					Zm00001d027502	0.204208	0.0265315	Adenylate kinase 1 chloroplastic		Zm00001d053555	-0.159267	0.0289973	Leucine-rich repeat (LRR) family protein
					Zm00001d054010	-0.365548	0.0266956	NA		Zm00001d036622	1.05495	0.0290186	Potassium transporter 1
					Zm00001d038605	-0.21724	0.0267135	Anthocyanidin 3-O-glucosyltransferase		Zm00001d025130	-0.36711	0.0290359	Metal tolerance protein C4
					Zm00001d029924	0.42698	0.0267265	Flavin-containing monooxygenase FMO GS-OX5		ENSRNA049461747	-0.320787	0.0291196	NA
					Zm00001d037393	0.197714	0.0267675	NA		Zm00001d032372	0.415236	0.029166	NA
					Zm00001d049709	-0.179339	0.0268266	Polyneuridine-aldehyde esterase		Zm00001d005028	0.485016	0.029245	NAC domain-containing protein 77
					Zm00001d027350	0.634327	0.0269589	NA		Zm00001d002899	0.327462	0.029245	Peroxidase 12
					Zm00001d047868	-0.18798	0.0270081	Late embryogenesis abundant (LEA) hydroxyproline-rich glycoprotein family		Zm00001d045327	0.255002	0.0292831	Pyridoxal-5'-phosphate-dependent enzyme family protein
					Zm00001d003902	0.149724	0.0270404	Polynucleotide adenylyltransferase family protein		Zm00001d031676	0.156887	0.0293094	Chitin elicitor receptor kinase 1
					Zm00001d024754	-0.289006	0.0272389	S-adenosylmethionine synthase		Zm00001d024961	1.43026	0.00324384	Serine/threonine protein kinase
					Zm00001d008398	0.343815	0.0273367	NA		Zm00001d029377	-0.555373	0.0293094	NA
					Zm00001d010493	-0.257176	0.0274659	F-box domain containing protein		Zm00001d012820	0.139192	0.0293094	Outer envelope pore protein 24A chloroplastic
					Zm00001d011136	0.159866	0.0274659	NADH dehydrogenase [ubiquinone] 1 beta subcomplex subunit 2		Zm00001d007448	0.647097	0.0293094	Pathogenesis-related protein 1
					Zm00001d033286	-0.840224	0.0274659	Phenylalanine ammonia-lyase 1		Zm00001d044802	-0.522276	0.0293094	Rho-related protein from plants 5
					Zm00001d038913	0.504118	0.0274732	lipid transfer protein1		Zm00001d050633	-0.115447	0.0294123	lysine ketoglutarate reductase trans-splicing protein
					Zm00001d017568	-0.0863836	0.0275211	WNK6		Zm00001d016783	0.242209	0.0294411	stress-induced protein kinase1
					Zm00001d039427	-0.194051	0.0275493	Protein kinase superfamily protein		Zm00001d036240	-0.116665	0.0294524	Probable beta-13-galactosyltransferase 14
					Zm00001d028314	-0.764198	0.0275606	Transcription factor bHLH18		Zm00001d039673	-0.108418	0.0296425	DEAD-box ATP-dependent RNA helicase 14
					Zm00001d041387	-0.546869	0.0275606	RING-H2 finger protein ATL65		Zm00001d040310	0.47465	0.0296425	NA
					Zm00001d036617	-0.848602	0.0275842	Protein LIGHT-DEPENDENT SHORT HYPOCOTYLS 5		Zm00001d002798	0.463498	0.0296425	OJ000126_13.10 protein; protein
					Zm00001d048270	0.168608	0.0275842	Beta-1%2C4-mannosyltransferase%3B Beta-1%2C4-mannosyltransferase isoform 1%3B Beta-1%2C4-mannosyltransferase isoform 2		Zm00001d014608	0.644123	0.0299096	Peroxidase 16
					Zm00001d012539	-0.220491	0.0278222	Protein RETICULATA-RELATED 3 chloroplastic		Zm00001d043063	0.673278	0.029927	Probable WRKY transcription factor 30
					Zm00001d036880	0.268604	0.0278234	EIN3-binding F-box protein 1		Zm00001d016800	0.228701	0.0302551	NA
					Zm00001d015133	-0.656568	0.0279472	Metal transporter Nramp6		Zm00001d049095	-0.121564	0.03027	EMB2756 (EMBRYO DEFECTIVE 2756)
					Zm00001d031019	0.325798	0.0280519	Homocysteine S-methyltransferase 2		Zm00001d035492	-0.165103	0.03027	IQ-domain 3
					Zm00001d002695	-0.349082	0.028472	Phosphatidylinositol N-acetyglucosaminlytransferase subunit P-related		Zm00001d053852	-0.152752	0.030355	Regulator of Vps4 activity in the MVB pathway protein
					Zm00001d000424	-0.257017	0.028532	Phytolongin Phyl1.1		Zm00001d027525	0.987068	0.0305702	Basic endochitinase B
					Zm00001d016635	-0.35784	0.028532	C2 domain protein		Zm00001d016842	0.408513	0.0307932	monooxygenase 1
					Zm00001d049260	-0.121309	0.0285628	Long chain base biosynthesis protein 2a		Zm00001d050107	0.235794	0.0308367	12-oxo-phytodienoic acid reductase8
					Zm00001d003588	0.3684	0.0287357	Ras-related protein RABD1		Zm00001d021173	0.416802	0.0308367	Formin-like protein 1
					Zm00001d018732	0.102915	0.0292892	Chaperone DnaJ-domain superfamily protein		Zm00001d015272	-0.149765	0.0308367	NA
					Zm00001d026590	-0.335625	0.0292892	Auxin response factor 8		Zm00001d035046	0.321142	0.0308367	Non-lysosomal glucosylceramidase
					Zm00001d005250	-0.202831	0.0292984	Cellulose synthase A catalytic subunit 3 [UDP-forming]		Zm00001d052371	0.791308	0.0308367	Protein LURP-one-related 8
					Zm00001d014532	-0.28121	0.0294864	Protein IRX15-LIKE		Zm00001d050106	-0.171918	0.0308723	ferredoxin-related
					Zm00001d028191	0.144637	0.0294943	LAP4 protein		Zm00001d043523	-0.494543	0.0309847	Profilin
					Zm00001d000011	0.27732	0.0295435	glyoxalase I homolog		Zm00001d053960	0.257203	0.0310447	3-isopropylmalate dehydratase large subunit
					Zm00001d010812	-0.395631	0.0295435	Heat stress transcription factor A-4a		Zm00001d027504	-0.209319	0.0310648	Nucleoside-triphosphatase THEP1
					Zm00001d012607	-0.223114	0.0295435	NAD(P)H dehydrogenase (quinone) FQR1		Zm00001d038838	-0.144209	0.031226	Calmodulin binding protein isoform 1; Calmodulin binding protein isoform 2
					Zm00001d012771	0.353065	0.0295435	tRNA/rRNA methyltransferase (SpoU) family protein		Zm00001d025903	-0.402811	0.031226	Endosomal targeting BRO1-like domain-containing protein
					Zm00001d042276	-0.292216	0.0295435	Probable beta-14-xylosyltransferase IRX10L		Zm00001d020858	-0.193753	0.0337644	Serine/threonine-protein kinase D6PKL1
					Zm00001d005002	0.583252	0.0296046	Probable peptide/nitrate transporter		Zm00001d001174	-1.09719	0.031226	NA
					Zm00001d008900	-0.232551	0.0296046	NA		Zm00001d044131	0.890954	0.031226	NA
					Zm00001d028392	0.21762	0.0296046	actin depolymerizing factor5		Zm00001d007388	-0.126783	0.031226	no exine formation 1
					Zm00001d052525	-0.315058	0.0296046	Calmodulin binding protein%3B Putative calmodulin-binding family protein		Zm00001d014903	0.151781	0.031226	Phospholipase C
					Zm00001d028907	0.212167	0.0299594	FAD/NAD(P)-binding oxidoreductase family protein		Zm00001d051896	0.278129	0.031226	Protein DOWNY MILDEW RESISTANCE 6
					Zm00001d047046	0.19832	0.0301787	DAR GTPase 2 mitochondrial		Zm00001d036091	0.139057	0.031226	root cap protein1
					Zm00001d008808	-0.63058	0.0303971	Putative MYB DNA-binding domain superfamily protein		Zm00001d002594	0.567749	0.031226	Transcription repressor OFP6
					Zm00001d053603	1.67545	0.0305151	ABC transporter A family member 7		Zm00001d049553	-0.0737393	0.031226	Vesicle-associated protein 1-1
					Zm00001d013655	-0.815198	0.030648	nicotianamine synthase 4		Zm00001d050283	1.38399	0.0312758	Sulfate transporter 1.2
					Zm00001d024687	-0.337698	0.0309728	Putative DUF604-domain containing/glycosyltransferase-related family protein		Zm00001d035089	-0.204814	0.031339	pleckstrin homology (PH) domain-containing protein
					Zm00001d021973	-0.224318	0.0310598	Protein SHORT-ROOT		Zm00001d025346	1.68385	0.0313756	Protein TERMINAL FLOWER 1
					Zm00001d006921	0.363937	0.0310698	NA		Zm00001d020852	0.638991	0.0315423	Cellulose synthase-like protein E1
					Zm00001d048474	0.230651	0.0310698	MADS1		Zm00001d022151	0.39905	0.0315432	F-box protein
					Zm00001d028510	-0.441841	0.0313717	Protein FAF-like chloroplastic		Zm00001d034129	0.275775	0.0315742	Peroxidase 73
					Zm00001d014090	0.336287	0.0314521	chaperonin 1		Zm00001d019757	0.152383	0.0315743	Beta-amylase 2 chloroplastic
					Zm00001d039669	-0.383194	0.0314521	Cytosolic sulfotransferase 17		Zm00001d048886	0.934053	0.0315814	NA
					Zm00001d007032	0.126346	0.0315666	NA		Zm00001d019756	0.149433	0.0316822	Beta-amylase
					Zm00001d000194	-0.747404	0.0315693	Glycine-rich protein family		Zm00001d051507	-0.147335	0.0318505	Protein PHOTOPERIOD-INDEPENDENT EARLY FLOWERING 1
					Zm00001d044967	-0.569557	0.0317597	Eukaryotic aspartyl protease family protein		Zm00001d029924	0.354238	0.0318635	Flavin-containing monooxygenase FMO GS-OX5
					Zm00001d033480	-0.234967	0.0318528	5-methyltetrahydropteroyltriglutamate--homocysteine methyltransferase		Zm00001d000135	0.172301	0.0318635	Late embryogenesis abundant protein (LEA) family protein
					Zm00001d023304	0.27675	0.0319428	NA		Zm00001d053524	-0.153803	0.0319511	Cwf21
					Zm00001d043018	-0.226319	0.0319428	PRA1 family protein B4		Zm00001d049362	0.131322	0.0322005	NA
					Zm00001d014152	0.299673	0.0320617	Cationic amino acid transporter 4 vacuolar		Zm00001d022081	0.746588	0.0322108	Protein COBRA
					Zm00001d014914	-1.15738	0.0320617	Leucoanthocyanidin dioxygenase		Zm00001d052950	0.237622	0.0322108	Uclacyanin-2
					Zm00001d039776	-0.172475	0.0320617	PLAC8 family protein		Zm00001d018284	0.275955	0.0324568	NA
					Zm00001d028328	-0.283613	0.0321498	NA		Zm00001d018857	0.538561	0.0324906	Probable carboxylesterase 15
					Zm00001d051552	0.162527	0.0322176	3-dehydrosphinganine reductase TSC10B		Zm00001d031872	-0.225795	0.0325165	Ribonuclease E/G-like protein chloroplastic
					Zm00001d028151	-0.539442	0.0322708	Putative polyol transporter 1		Zm00001d029628	0.422991	0.0326007	cystatin7
					Zm00001d003199	0.299307	0.0324134	CCR-like		Zm00001d009840	-0.103555	0.0326473	Kinesin-like protein KIN-13A
					Zm00001d004354	-0.212809	0.0324469	CBS domain-containing protein CBSX1 chloroplastic		Zm00001d000169	-0.119342	0.0211762	Serine/threonine-protein kinase MHK
					Zm00001d031785	-0.401778	0.0325633	receptor-like protein kinase 4		Zm00001d025709	0.311654	0.0327048	NA
					Zm00001d019677	-0.152527	0.0327247	F-box protein		Zm00001d016157	-0.353268	0.032972	NA
					Zm00001d048317	-0.370303	0.0328564	NA		Zm00001d040508	-0.21233	0.032972	Tubulin beta-2 chain
					Zm00001d023468	-0.2441	0.0328699	NDR1/HIN1-like 1		Zm00001d007274	0.366821	0.0330318	Protein kinase Kelch repeat:Kelch
					Zm00001d030744	-0.229737	0.0328699	NA		Zm00001d041697	0.156149	0.0331969	Cofactor-independent phosphoglycerate mutase
					Zm00001d043485	0.133896	0.0328699	Transposon protein Pong sub-class [Source:UniProtKB/TrEMBL;Acc:B4FSZ0]		Zm00001d026370	-0.245424	0.033342	Leucoanthocyanidin reductase
					Zm00001d036698	-0.435127	0.0329148	luteus15		Zm00001d028528	-0.144997	0.033342	Mitochondrial phosphate carrier protein 3 mitochondrial
					Zm00001d001947	0.306969	0.0331777	TLD-domain containing nucleolar protein		Zm00001d042625	0.547658	0.033342	Pectinesterase
					Zm00001d028679	-0.170124	0.0332411	Protein binding protein		Zm00001d027622	0.464993	0.033387	Zinc finger (C3HC4-type RING finger) family protein
					Zm00001d044918	-0.326736	0.0332569	NA		Zm00001d043502	-0.115062	0.0334072	Golgin candidate 1
					Zm00001d025126	-0.27804	0.0333811	CASP-like protein 7		Zm00001d011223	0.149949	0.0334393	Protein indeterminate-domain 9
					Zm00001d005902	0.128301	0.0334183	Sec23/Sec24 protein transport family protein		Zm00001d030347	0.323934	0.0337644	Alcohol dehydrogenase-like 3
					Zm00001d015505	0.164941	0.0334183	Nucleoid-associated protein chloroplastic		Zm00001d036647	0.724698	0.0337644	BTB/POZ and MATH domain-containing protein 2
					Zm00001d052591	0.543569	0.0334517	B3 domain-containing protein		Zm00001d029197	0.197366	0.0337644	IQ-domain 11
					Zm00001d049196	0.454845	0.0334744	Pentatricopeptide repeat protein PPR986-12		Zm00001d007884	0.167573	0.0337644	MD-2-related lipid recognition domain-containing protein / ML domain-containing protein
					Zm00001d011750	0.12806	0.0336648	NADH:ubiquinone oxidoreductase intermediate-associated protein 30		Zm00001d008523	1.18098	0.0337644	NA
					Zm00001d000992	0.994207	0.0336686	NA		Zm00001d007174	0.214033	0.0337644	NA
					Zm00001d045538	0.204619	0.0336686	Superoxide dismutase		Zm00001d042747	-0.294485	0.0109926	Serine/threonine-protein kinase Nek5
					Zm00001d033210	0.142085	0.0338388	Chaperone protein dnaJ 3		Zm00001d049088	0.216891	0.0338385	ATP-dependent (S)-NAD(P)H-hydrate dehydratase
					Zm00001d040780	0.232561	0.0338497	NA		Zm00001d002707	0.742778	0.0338385	Cis-zeatin O-glucosyltransferase 1
					Zm00001d034191	-0.201372	0.0339196	Electron transporter		Zm00001d044831	-0.110826	0.0338385	DCD (Development and Cell Death) domain protein
					Zm00001d008624	-0.236791	0.0340232	HSP20-like chaperones superfamily protein		Zm00001d041853	1.21875	0.0338385	myb transcription factor8
					Zm00001d042028	-0.10886	0.0340415	NA		Zm00001d003780	0.360577	0.0338385	NA
					Zm00001d044546	-0.363551	0.0340415	Common plant regulatory factor 7		Zm00001d001497	0.181239	0.0338385	NA
					Zm00001d043904	0.199009	0.0341697	Cyclic dof factor 2		Zm00001d011420	1.0118	0.0338385	Putative cytochrome P450 superfamily protein
					Zm00001d044382	-0.546484	0.034357	alpha/beta-Hydrolases superfamily protein		Zm00001d045520	0.137828	0.0338385	Succinate dehydrogenase subunit 8A mitochondrila
					Zm00001d048065	-0.189277	0.0344228	Tubulin alpha-1 chain		Zm00001d006251	0.16067	0.0338385	Thioredoxin superfamily protein
					Zm00001d053819	0.286812	0.0344228	Auxin response factor 6		Zm00001d006079	-0.149598	0.0338385	Ubiquitin carboxyl-terminal hydrolase 2
					Zm00001d034519	-0.212673	0.0344337	Probable acyl-activating enzyme 18 peroxisomal		Zm00001d038594	-0.299582	0.0339097	Protein translation factor SUI1 homolog 2
					Zm00001d045685	0.630858	0.0344337	NA		Zm00001d049190	-0.204668	0.0339925	DNA replication licensing factor MCM2
					Zm00001d018179	0.260629	0.0344923	Remorin family protein		Zm00001d043401	-0.210539	0.0342497	Phosphatidate cytidylyltransferase
					Zm00001d014722	-0.32409	0.0344974	Glycosyltransferase		Zm00001d014250	1.3803	0.0343056	Protein TIFY 10B
					Zm00001d018235	0.46496	0.034568	NA		Zm00001d022175	0.294374	0.0346504	Cyclin-D2-1
					Zm00001d012167	-0.355269	0.0347805	SF16 protein		Zm00001d021696	-0.212534	0.0347087	Cysteine-rich receptor-like protein kinase 10
					Zm00001d034490	0.10538	0.0347926	Cactin		Zm00001d051924	0.138438	0.0347087	Haloacid dehalogenase-like hydrolase domain-containing protein
					Zm00001d023253	-0.399881	0.0348469	L-type lectin-domain containing receptor kinase IX.1		Zm00001d031426	0.294996	0.0219726	Serine/threonine-protein kinase UCNL
					Zm00001d025460	-0.143563	0.0348928	Coiled-coil domain-containing protein 55 (DUF2040)		Zm00001d015334	-0.975042	0.0348464	CRIB domain-containing protein RIC10
					Zm00001d046850	-1.36825	0.0349764	GDSL esterase/lipase		Zm00001d045669	0.360927	0.0349135	Acylphosphatase
					Zm00001d011953	-0.294369	0.0349851	Auxin response factor 2		Zm00001d030981	0.916199	0.0349135	Leucine-rich repeat protein kinase family protein
					Zm00001d034044	-0.120635	0.0355523	NA		Zm00001d008792	1.1387	0.0349135	NA
					Zm00001d008965	-0.206805	0.0355584	Putative inactive receptor-like protein kinase		Zm00001d033730	0.162879	0.0349135	NA
					Zm00001d026266	0.850889	0.0356657	Probable nucleoredoxin 3		Zm00001d003552	0.594283	0.0349135	RmlC-like cupins superfamily protein
					Zm00001d008604	-0.345514	0.0357578	Protein NRT1/ PTR FAMILY 8.1		Zm00001d045735	0.151607	0.0349135	Zinc finger protein CONSTANS-LIKE 1
					Zm00001d046700	0.287841	0.0357578	NAD(P)-binding Rossmann-fold superfamily protein		Zm00001d041662	-1.35798	0.0350523	OSJNBa0024J22.14 protein
					Zm00001d049594	-0.98985	0.0357578	Phospholipase A1-Ibeta2 chloroplastic		Zm00001d018712	0.587824	0.0352962	NA
					Zm00001d051842	0.277192	0.0357578	Zn-dependent hydrolase%2C including glyoxylase		Zm00001d032346	0.1499	0.035436	UDP-glucose 4-epimerase 4
					Zm00001d041620	0.106356	0.0358522	CTP synthase family protein		Zm00001d047821	0.376611	0.0355088	NA
					Zm00001d045675	0.0941856	0.0359421	asparagine synthetase1		Zm00001d045312	0.234634	0.0355812	NA
					Zm00001d018704	1.07241	0.0359925	NA		Zm00001d051121	0.556062	0.0357605	RmlC-like cupins superfamily protein
					Zm00001d024307	0.257522	0.036298	UDP-N-acetylglucosamine diphosphorylase 2		Zm00001d005410	1.21792	0.0358089	Aquaporin PIP2-2
					Zm00001d007174	0.233213	0.0363819	NA		Zm00001d037721	0.807217	0.0360413	UDP-glycosyltransferase 72B1
					Zm00001d053702	0.421927	0.0364014	Serine/threonine protein phosphatase 2A regulatory subunit B''alpha		Zm00001d039974	0.277759	0.0360567	NA
					Zm00001d052063	-0.379046	0.036404	Transmembrane amino acid transporter family protein		ENSRNA049474924	-0.739047	0.0360567	NA
					Zm00001d025148	0.603087	0.0364844	NA		Zm00001d014906	0.135429	0.0360567	Phosphoinositide phospholipase C 4
					Zm00001d002064	-0.210565	0.0365814	Glycosyltransferase		Zm00001d043093	-0.105767	0.0360809	Protein MOR1
					Zm00001d044920	-0.175273	0.036644	NAD(P)H dehydrogenase C1		Zm00001d000360	0.498149	0.0360907	Protein SRG1
					Zm00001d012267	-0.145408	0.0366991	NPL4-like protein 1		Zm00001d003446	0.352827	0.036104	Gamma-glutamyltranspeptidase 1
					Zm00001d049019	-0.189251	0.0368639	Ankyrin repeat protein SKIP35		Zm00001d022006	0.230145	0.0361158	Lipase-like protein
					Zm00001d002958	-0.380164	0.0368764	FIP1		Zm00001d050436	0.205391	0.0361606	DUF868 family protein
					Zm00001d042722	0.191035	0.0370399	NA		Zm00001d012763	-0.143035	0.0361606	kinesin-related protein16
					Zm00001d018146	-0.161161	0.0370478	Methionine aminopeptidase 1D chloroplastic/mitochondrial		Zm00001d044555	-0.387325	0.0361835	Calcium permeable stress-gated cation channel 1
					Zm00001d037229	-0.425529	0.0370478	Transmembrane amino acid transporter family protein		Zm00001d035249	-1.06447	0.0362157	HXXXD-type acyl-transferase family protein
					Zm00001d037242	-0.386209	0.0370478	Urea-proton symporter DUR3		Zm00001d003617	-0.255434	0.0362157	Probable pectinesterase/pectinesterase inhibitor 51
					Zm00001d040398	1.10868	0.0371125	Protein kinase superfamily protein		Zm00001d039061	-1.12624	0.0365585	Probable sodium/metabolite cotransporter BASS4 chloroplastic
					Zm00001d009416	0.391045	0.0371282	Jacalin-related lectin 19		Zm00001d012302	0.201204	0.0366624	Sialyltransferase-like protein
					Zm00001d052944	-0.18265	0.037177	calcium/calmodulin dependent protein kinase1		Zm00001d030614	-0.156794	0.0369193	DNA replication licensing factor MCM7
					Zm00001d009146	-0.299098	0.0372605	S-adenosylmethionine synthase		Zm00001d018494	0.124199	0.0369193	Probable protein S-acyltransferase 15
					Zm00001d014058	0.0961355	0.0372605	Heterogeneous nuclear ribonucleoprotein 1		Zm00001d005393	0.191234	0.0370214	E3 ubiquitin-protein ligase
					Zm00001d006101	-0.513461	0.03727	Calmodulin binding protein		Zm00001d049016	0.286943	0.0370214	F-box/kelch-repeat protein SKIP20
					Zm00001d010970	0.11871	0.0374181	Isovaleryl-CoA dehydrogenase mitochondrial		Zm00001d039717	-0.119557	0.0370214	Nucleotide/sugar transporter family protein
					ENSRNA049463813	-0.81707	0.0375468	U1 spliceosomal RNA		Zm00001d052026	0.865689	0.0370399	Putative AP2/EREBP transcription factor superfamily protein
					Zm00001d027630	-0.167315	0.0378621	Phosphatidylinositol N-acetyglucosaminlytransferase subunit P-related		Zm00001d043104	0.285222	0.0370404	NA
					Zm00001d032536	0.335246	0.0379301	Calcium uniporter protein 4 mitochondrial		Zm00001d033271	0.64083	0.0370432	F-box domain containing protein expressed
					Zm00001d036054	-0.141139	0.0379301	Ubiquitin-conjugating enzyme E2 2		Zm00001d033156	0.69904	0.0371064	NA
					Zm00001d039901	-0.11764	0.0381367	NA		Zm00001d052660	0.0769342	0.0371064	Outer envelope protein 64 chloroplastic
					Zm00001d010442	0.602833	0.0383286	Putative wall-associated receptor protein kinase family protein		Zm00001d028967	-0.640592	0.0371064	Probable ADP-ribosylation factor GTPase-activating protein AGD14
					Zm00001d002191	0.478847	0.0383726	Organic cation/carnitine transporter 4		Zm00001d012746	0.24412	0.0371407	Probable WRKY transcription factor 69
					Zm00001d021850	-0.469982	0.0387671	Cupredoxin superfamily protein		Zm00001d038460	0.322137	0.0371407	Putative aminotransferase class III superfamily protein
					Zm00001d053831	1.08333	0.0388712	CRIB domain-containing protein RIC10		Zm00001d021188	-0.101127	0.0371675	Flowering time control protein FPA
					Zm00001d037023	1.1959	0.0388885	Putative RING zinc finger domain superfamily protein		Zm00001d012525	-0.100261	0.0371675	Protein MOR1
					Zm00001d013678	0.161166	0.0389982	NA		Zm00001d046930	-0.104433	0.0372352	Transducin/WD40 repeat-like superfamily protein
					Zm00001d031093	0.375705	0.0389982	NA		Zm00001d021073	0.271376	0.0372352	transferases transferring acyl groups other than amino-acyl groups;acyltransferases
					Zm00001d053119	0.213751	0.039086	NA		Zm00001d044463	-0.181693	0.0373893	Protein LOL2
					Zm00001d020250	-0.694242	0.0392359	NA		Zm00001d013230	0.500779	0.0377473	bentazon resistance1
					Zm00001d008625	-0.204501	0.0394141	Inner membrane protein ALBINO3 chloroplastic		Zm00001d009708	0.176563	0.0377473	Putative calcium-dependent protein kinase family protein
					Zm00001d011398	-0.363164	0.0394626	NA		Zm00001d037609	0.428433	0.0377574	GDSL esterase/lipase
					Zm00001d017298	-0.300711	0.0394626	DUF3755 family protein		Zm00001d004876	-0.485796	0.0377574	Late embryogenesis abundant (LEA) hydroxyproline-rich glycoprotein family
					Zm00001d021826	-0.347752	0.0394626	Nodulation signaling pathway 2 protein		Zm00001d018656	0.55749	0.0378031	Probable WRKY transcription factor 57
					Zm00001d029290	-0.461548	0.0395082	Cytochrome P450 CYP709H1		Zm00001d019552	0.360791	0.0382342	Alpha-galactosidase
					Zm00001d049624	0.282528	0.0396378	Magnesium transporter CorA-like family protein		Zm00001d033187	0.295534	0.0382342	Glycerophosphoryl diester phosphodiesterase
					Zm00001d033589	0.261636	0.0396589	Ribosomal protein S21 family protein		Zm00001d000508	0.399191	0.0382448	NA
					Zm00001d017840	0.176695	0.0396865	Delta(12)-fatty-acid desaturase		Zm00001d005453	0.0894167	0.0383803	heteroglycan glucosidase 1
					Zm00001d008923	-0.319826	0.0397457	NA		Zm00001d016529	0.368044	0.0383803	NA
					Zm00001d009508	-0.175836	0.0397457	DUF1639 family protein		Zm00001d006704	-0.153222	0.0386414	RNA-binding (RRM/RBD/RNP motifs) family protein
					Zm00001d023299	-0.403265	0.0397457	Zinc finger CCCH domain-containing protein 46		Zm00001d021891	-0.246283	0.0386414	Tubulin alpha-6 chain
					Zm00001d043393	1.32586	0.0397457	Beta-galactosidase		Zm00001d006454	-0.263472	0.0387314	Filament-like plant protein 3
					Zm00001d049743	-0.286846	0.0397457	Transcription termination factor MTERF6 chloroplastic/mitochondrial		Zm00001d006009	0.393157	0.0387642	Fasciclin-like arabinogalactan protein 7
					Zm00001d017050	0.189142	0.0397702	Protein kinase superfamily protein		Zm00001d028170	-0.215807	0.0387707	Dopamine beta-monooxygenase
					Zm00001d020485	-0.112315	0.0398286	Golgi SNAP receptor complex member 1		Zm00001d029408	0.174714	0.0387707	GTP-binding protein 1
					Zm00001d011592	-0.257142	0.0401631	NA		Zm00001d043230	-0.184883	0.0388166	Pentatricopeptide repeat-containing protein
					Zm00001d048392	0.176937	0.0401652	DENN (AEX-3) domain-containing protein		Zm00001d036669	0.782823	0.0389342	NA
					Zm00001d020420	-0.645239	0.0403203	NA		Zm00001d005716	0.206686	0.0390307	carbon-sulfur lyases
					Zm00001d020506	-0.159348	0.0403203	26S proteasome non-ATPase regulatory subunit 9		Zm00001d053367	0.284332	0.0390328	AGP16
					Zm00001d022630	2.11607	0.0403203	knotted1 induced1		Zm00001d017689	0.260773	0.039206	SNARE associated Golgi protein family
					Zm00001d035774	-0.106816	0.0403203	Putative prolin-rich extensin-like receptor protein kinase family protein isoform 1%3B Putative prolin-rich extensin-like receptor protein kinase family protein isoform 2		Zm00001d024305	-0.160526	0.0392228	Methyl-CpG-binding domain-containing protein 13
					Zm00001d036006	0.19826	0.0403203	NA		Zm00001d023994	0.260709	0.0393347	Beta-glucosidase, chloroplastic""
					Zm00001d053544	-0.215372	0.0403203	U-box domain-containing protein 17		Zm00001d051384	-0.644273	0.0393347	Cortical cell-delineating protein
					Zm00001d010244	-0.241608	0.0403254	NA		Zm00001d037864	-0.141609	0.039374	Heat shock protein DnaJ with tetratricopeptide repeat
					Zm00001d032888	-0.567128	0.0403753	Anther-specific proline-rich protein APG		Zm00001d034382	1.38254	0.039374	rRNA N-glycosidase
					Zm00001d004417	0.480496	0.0406487	Peptidase S24/S26A/S26B/S26C family protein		Zm00001d017949	0.444794	0.0394224	Endoglucanase 8
					Zm00001d016934	-1.67075	0.0406487	Galactose mutarotase-like superfamily protein		Zm00001d052054	0.382619	0.0394224	sequence-specific DNA binding transcription factors
					Zm00001d031995	0.184124	0.0406487	Dihydroneopterin aldolase 2		Zm00001d019365	0.949463	0.0395083	phytoene desaturation 1
					Zm00001d025797	1.59945	0.0409261	NA		Zm00001d053660	0.179675	0.039819	Putative regulator of chromosome condensation (RCC1) family protein
					Zm00001d033248	-0.166375	0.0410846	Histone-binding protein MSI1		Zm00001d050216	-0.129253	0.0398756	Afadin/alpha-actinin-binding protein
					Zm00001d025932	-0.276156	0.0412977	Remorin		Zm00001d035609	0.429932	0.0400963	ZFP16-1
					Zm00001d039902	-0.151599	0.0412977	ATP binding protein		Zm00001d049545	0.497344	0.0401797	RING/U-box superfamily protein
					Zm00001d047263	0.831513	0.0412977	NA		Zm00001d019125	-0.16306	0.0402583	NEP-interacting protein 1
					Zm00001d020457	-1.33868	0.0413233	Transcription factor MYB30		Zm00001d045314	0.233342	0.0402583	Probable thiol methyltransferase 2
					Zm00001d047657	0.945745	0.0413233	Xyloglucan 6-xylosyltransferase 2		Zm00001d017807	0.386513	0.0403615	NA
					Zm00001d047523	-0.891302	0.041434	Probable WRKY transcription factor 30		Zm00001d018393	0.440667	0.0403615	Protein binding protein
					Zm00001d007924	1.04228	0.0414709	cytochrome P450 family 93 subfamily D polypeptide 1		Zm00001d000107	-0.983035	0.0403897	Fatty acyl-CoA reductase 1
					Zm00001d037278	0.145373	0.0414936	phosphofructose kinase1		Zm00001d016582	0.67838	0.0403897	SAUR-like auxin-responsive protein family
					Zm00001d005253	0.232851	0.0415065	V-type proton ATPase subunit G1		Zm00001d018927	0.113994	0.0406597	Protein FATTY ACID EXPORT 1 chloroplastic
					Zm00001d023425	-0.300906	0.0415065	Putative receptor protein kinase CRINKLY4		Zm00001d049944	-0.583188	0.0408167	60S ribosomal protein L10a-1
					Zm00001d034832	0.186957	0.0417623	Probable acyl-activating enzyme 16 chloroplastic		Zm00001d034962	0.174792	0.0408167	embryo specific2
					Zm00001d005241	-0.189986	0.0418144	Mediator of RNA polymerase II transcription subunit 33A		Zm00001d038452	0.357316	0.0408167	ENTH/VHS/GAT family protein
					Zm00001d006853	-1.17733	0.0418144	Protein STRICTOSIDINE SYNTHASE-LIKE 6		Zm00001d002621	0.210691	0.0408167	RING-H2 finger protein ATL7
					Zm00001d002959	-0.473042	0.0418478	Putative GEM-like protein 8		Zm00001d005894	0.157291	0.0408456	Leucine-rich repeat (LRR) family protein
					Zm00001d028249	0.445974	0.0418913	Probable peroxygenase 4		Zm00001d045374	0.512074	0.0408456	NA
					Zm00001d007167	-0.752727	0.0419137	CBL-interacting serine/threonine-protein kinase 15		Zm00001d013597	0.119368	0.0408456	Protein CDC73 homolog
					Zm00001d002625	-0.212258	0.0421231	Probable methyltransferase PMT15		Zm00001d053799	-0.767487	0.0408456	transglycosylase SLT domain containing protein expressed
					Zm00001d052066	-0.274712	0.0422779	Mitogen-activated protein kinase kinase 5		Zm00001d048887	0.838574	0.0409607	NA
					Zm00001d028713	-0.122102	0.0424049	Probable sugar phosphate/phosphate translocator		Zm00001d024413	0.123345	0.0411474	(DL)-glycerol-3-phosphatase 2
					Zm00001d036440	0.308879	0.0424049	WAT1-related protein		Zm00001d035191	0.20845	0.0413117	Tetratricopeptide repeat (TPR)-like superfamily protein
					Zm00001d032306	-0.39129	0.0424139	NA		Zm00001d038446	0.594061	0.0414273	Dehydration-responsive element-binding protein 2E
					Zm00001d039426	-0.365471	0.0424139	Beta-glucuronosyltransferase GlcAT14B		Zm00001d003518	-0.149626	0.0415436	NA
					Zm00001d044654	-0.612574	0.0424139	LRR protein WM1.10		Zm00001d011614	1.15163	0.0415436	Putative MYB DNA-binding domain superfamily protein
					Zm00001d049016	0.331164	0.0424139	F-box/kelch-repeat protein SKIP20		Zm00001d017113	-0.115425	0.0417133	NA
					Zm00001d049359	-0.338262	0.0424139	O-Glycosyl hydrolases family 17 protein		Zm00001d010470	-0.115601	0.0418465	E3 ubiquitin-protein ligase KEG
					Zm00001d053415	-1.25396	0.0424139	NA		Zm00001d011330	0.133562	0.0418774	Cytochrome c oxidase subunit 5b-2 mitochondrial
					Zm00001d013061	-0.177679	0.042661	Thioredoxin		Zm00001d006336	0.184613	0.0418774	NA
					Zm00001d013547	-0.238995	0.042661	BEL1-like homeodomain protein 3		Zm00001d049008	0.859862	0.0418848	Apyrase 1
					Zm00001d020238	-0.377503	0.042661	Protein HOTHEAD		Zm00001d038930	0.536408	0.0419065	Transcription factor MYB36
					Zm00001d022264	-0.372425	0.042661	proteolipid membrane potential regulator5		Zm00001d031209	0.150809	0.041911	benzoxazinone synthesis9
					Zm00001d022561	0.348706	0.042661	Negatively light-regulated protein		Zm00001d038810	0.434311	0.041911	DNA-binding WRKY
					Zm00001d038105	-0.263787	0.042661	Glycosyltransferase family 61 protein		Zm00001d049011	-0.376843	0.0419738	Polyketide cyclase/dehydrase and lipid transport superfamily protein
					Zm00001d038830	0.218457	0.042661	Putative inositol polyphosphate phosphatase (Synaptogenin-like) family protein		Zm00001d051541	-1.06028	0.0421104	NA
					Zm00001d002899	0.404538	0.042844	Peroxidase 12		Zm00001d028785	0.564592	0.0421561	DUF538 family protein
					Zm00001d017641	-0.264094	0.042844	Regulator of chromosome condensation (RCC1) family with FYVE zinc finger domain		Zm00001d003035	0.273812	0.0422469	Tetratricopeptide repeat (TPR)-like superfamily protein
					Zm00001d032423	0.454149	0.042844	dormancy associated1		Zm00001d009693	-0.345984	0.0422536	Protein REDUCED WALL ACETYLATION 3
					Zm00001d047937	-0.329762	0.042844	armadillo repeat only 1		Zm00001d048315	0.100897	0.0426797	3-dehydroquinate synthase
					Zm00001d008692	-0.323201	0.0428643	O-fucosyltransferase family protein		Zm00001d006342	0.228068	0.0426918	Mo-molybdopterin cofactor sulfurase
					Zm00001d011792	-0.245395	0.0428643	UDP-D-apiose/UDP-D-xylose synthase 2		Zm00001d042054	0.383526	0.0428782	ARM repeat superfamily protein
					Zm00001d030900	-0.161335	0.0428643	Pyridoxal phosphate (PLP)-dependent transferases superfamily protein		Zm00001d028810	0.175782	0.0428782	LL-diaminopimelate aminotransferase chloroplastic
					Zm00001d032422	0.45414	0.0428643	Dormancy-associated protein 1		Zm00001d002155	0.0998641	0.0429857	LSM7-like
					Zm00001d045122	2.35115	0.0428643	ATPase 8 plasma membrane-type		Zm00001d049683	0.58072	0.0430665	Probable L-gulonolactone oxidase 6
					Zm00001d042284	-0.121378	0.0429097	RING/U-box superfamily protein		Zm00001d030907	0.847106	0.0430887	B3 domain-containing protein
					Zm00001d045211	-1.35056	0.0429448	Zinc finger protein ZAT11		Zm00001d011735	0.428514	0.0430887	serine acetyltransferase1
					Zm00001d003983	0.271816	0.0434663	Aldehyde dehydrogenase family 7 member B4		Zm00001d050195	0.327491	0.0431887	Putative WRKY DNA-binding domain superfamily protein
					Zm00001d012336	-0.148058	0.0434663	Calcium-dependent lipid-binding (CaLB domain) family protein		Zm00001d006910	-0.140467	0.0431935	NA
					Zm00001d040606	-0.214917	0.0434745	Galactose oxidase/kelch repeat superfamily protein		Zm00001d010578	-0.192462	0.0431935	Protein kinase superfamily protein
					Zm00001d017926	0.377952	0.0436214	NHL domain-containing protein		Zm00001d009181	-0.175049	0.0431935	Serine/threonine-protein phosphatase
					Zm00001d008316	0.418651	0.0436927	Pentatricopeptide repeat-containing protein		Zm00001d050191	-0.13419	0.0431935	Ubiquitin-specific protease family C19-related protein
					Zm00001d001319	0.934266	0.0439981	NA		Zm00001d004731	0.371305	0.0433482	Aldehyde dehydrogenase
					Zm00001d035494	-0.364473	0.0441936	Probable beta-14-xylosyltransferase IRX9		Zm00001d023680	0.423221	0.0433482	Pollen Ole e 1 allergen and extensin family protein
					Zm00001d009007	-0.307648	0.044324	Probable ubiquitin-conjugating enzyme E2 25		Zm00001d038791	0.34427	0.0433482	Putative leucine-rich repeat receptor-like protein kinase family protein
					Zm00001d016938	-0.514564	0.044324	sucrose transporter GRMZM2G081589		Zm00001d049781	0.39379	0.0433482	Speckle-type POZ protein-like protein
					Zm00001d029084	0.191073	0.044324	Fumarate hydratase 1 mitochondrial		Zm00001d006921	0.233836	0.0436209	NA
					Zm00001d034977	-0.277507	0.0443921	VAMP protein SEC22		Zm00001d017205	-0.20226	0.0436209	Nucleotide/sugar transporter family protein
					Zm00001d027887	-0.38334	0.0444239	Catalytic/ hydrolase		Zm00001d043857	0.157578	0.0436888	NA
					Zm00001d007692	-0.115482	0.0447133	Auxilin-related protein 1		Zm00001d017099	0.293697	0.0436888	RNI-like superfamily protein
					Zm00001d021638	0.302509	0.0447133	Protein HYPER-SENSITIVITY-RELATED 4		Zm00001d014967	-0.186192	0.043757	Helicase protein MOM1
					Zm00001d003712	0.53447	0.0447371	abscisic acid stress ripening3		Zm00001d038552	0.660848	0.0437787	NA
					Zm00001d020726	0.803726	0.0448149	Probable protein phosphatase 2C 12		Zm00001d018786	0.256274	0.0439257	Disease resistance RPP13-like protein 4
					Zm00001d021442	-0.334999	0.045252	Protein NLP2		Zm00001d005874	0.494319	0.0439588	NA
					Zm00001d032380	-0.33485	0.0454478	acclimation of photosynthesis to environment		Zm00001d040249	-2.01399	0.0439588	Putative expansin-A17
					Zm00001d009660	0.224062	0.0454946	Protein kinase superfamily protein		Zm00001d005350	-0.115648	0.0441291	ENTH/VHS family protein
					Zm00001d022078	-0.333575	0.0456545	Eukaryotic aspartyl protease family protein		Zm00001d051102	-0.795032	0.0441626	Leucine-rich repeat (LRR) family protein
					Zm00001d012810	0.975889	0.0456576	sigma-like factor6		Zm00001d037361	-0.774109	0.0441626	NA
					Zm00001d025859	-0.339223	0.0456576	MazG nucleotide pyrophosphohydrolase domain protein		Zm00001d047560	0.434045	0.0442862	Protein binding protein; Putative RING zinc finger domain superfamily protein isoform 1; Putative RING zinc finger domain superfamily protein isoform 2
					Zm00001d032812	-0.391998	0.0456576	Subtilisin-like protease SBT2.6		Zm00001d044773	0.351336	0.0442862	Putative ARM repeat-containing protein containing family protein
					Zm00001d041782	0.466888	0.0456576	Plant-specific domain TIGR01627 family protein		Zm00001d039324	0.26282	0.0443358	Ethylene-responsive transcription factor CRF4
					Zm00001d038904	0.238771	0.0459672	Threonine synthase 1 chloroplastic		Zm00001d033217	-0.108205	0.0218507	Serine/threonine-protein phosphatase BSL3
					Zm00001d051688	0.182745	0.0459672	fimbrin homolog1		Zm00001d019527	0.465969	0.0447354	Yucca5
					Zm00001d047418	-1.02784	0.046076	Cytochrome P450 709B2		Zm00001d036925	0.948803	0.0449592	Protein kinase Kelch repeat:Kelch
					Zm00001d017208	0.440334	0.0460851	Tic20-like protein		Zm00001d017157	0.317604	0.0449592	TRAF-like superfamily protein
					Zm00001d032850	0.391868	0.0460851	phosphate transporter protein2		Zm00001d048563	0.191023	0.0451177	ARM repeat superfamily protein
					Zm00001d043283	0.388388	0.0460851	Phosphoglycerate mutase-like family protein		Zm00001d027206	-0.796263	0.0451177	NA
					Zm00001d044501	-0.128837	0.0460851	NA		Zm00001d044033	0.130221	0.0451177	TRICHOME BIREFRINGENCE-LIKE 20
					Zm00001d006659	-0.296202	0.0463405	Constitutive photomorphogenesis protein 10		Zm00001d003494	0.347807	0.0451675	NA
					Zm00001d044476	-0.691633	0.0463405	ABC transporter G family member 10		Zm00001d001263	-0.329973	0.0451845	NA
					Zm00001d052809	0.181617	0.0463405	Heat shock protein 90-5 chloroplastic		Zm00001d036422	-0.153239	0.0453601	NA
					Zm00001d016101	-0.240846	0.0467083	NA		Zm00001d034062	0.218284	0.0455491	PLASMODESMATA CALLOSE-BINDING PROTEIN 2
					Zm00001d042665	-0.426802	0.0469014	Transcription repressor MYB6		Zm00001d015932	-0.0735244	0.0455606	Chromatin modification-related protein EAF3
					Zm00001d023225	-0.362936	0.0472708	Protein trichome birefringence-like 34		Zm00001d022209	-0.120764	0.0455606	Developmentally-regulated GTP-binding protein 1
					Zm00001d003572	-0.107109	0.0475318	Calmodulin-binding protein 60 C		Zm00001d015435	-0.123074	0.0455719	Protein STRUBBELIG-RECEPTOR FAMILY 1
					Zm00001d037338	0.437829	0.0475465	Endoglucanase 8		Zm00001d029478	-0.395688	0.0456844	MOB kinase activator-like 2A
					Zm00001d021462	-0.863722	0.0476428	Enoyl-CoA hydratase 2 peroxisomal		Zm00001d043391	0.243586	0.0457743	NA
					Zm00001d039859	-0.698193	0.0476428	Metallothionein-like protein type 2		Zm00001d053843	0.617118	0.0457946	Wound induced protein
					Zm00001d050298	1.58336	0.0477478	Cullin-associated NEDD8-dissociated protein 1		Zm00001d038351	0.147295	0.0459013	Adenine nucleotide alpha hydrolases-like superfamily protein
					Zm00001d044619	0.201968	0.0478687	NA		Zm00001d044808	-0.1784	0.0459013	RING-H2 finger protein ATL46
					Zm00001d020348	-0.220814	0.0479413	NA		Zm00001d012664	0.209529	0.0461189	Putative RING zinc finger domain superfamily protein
					Zm00001d027938	-0.373299	0.0479413	UDP-glucuronate:xylan alpha-glucuronosyltransferase 2		Zm00001d016414	0.298477	0.0461189	UDP-glycosyltransferase 73D1
					Zm00001d030675	-0.206291	0.0479413	UNC93-like protein 3		Zm00001d004785	-0.101069	0.0461436	Protein TPLATE
					Zm00001d047888	0.263543	0.0479413	Catalytic/ oxidoreductase%2C acting on NADH or NADPH		Zm00001d019948	-0.151032	0.0461681	Protein ENHANCED DOWNY MILDEW 2
					Zm00001d021095	-0.547872	0.0481847	NA		Zm00001d026131	-0.532659	0.0461841	Lysine histidine transporter-like 7
					Zm00001d033794	-0.453806	0.0482111	65-kDa microtubule-associated protein 6		Zm00001d025057	0.201624	0.0461878	NAD(P)-linked oxidoreductase superfamily protein
					Zm00001d010066	-0.285883	0.048233	NA		Zm00001d038375	0.188754	0.0463103	Cysteine--tRNA ligase 1 cytoplasmic
					Zm00001d034931	-0.144815	0.048233	COP1-interacting protein-related		Zm00001d007907	0.127765	0.0463103	D-lactate dehydrogenase [cytochrome] mitochondrial
					Zm00001d040162	-0.159869	0.048233	NA		Zm00001d027659	0.229828	0.0463103	NA
					Zm00001d044930	-0.414796	0.048233	EF hand family protein		Zm00001d042123	-0.597	0.0464908	Cytosolic sulfotransferase 17
					Zm00001d047089	0.422738	0.048233	Beta-expansin 5		Zm00001d043274	0.198378	0.0464908	Insulin-degrading enzyme-like 1 peroxisomal
					Zm00001d035689	0.271788	0.0484503	cysteine protease5		Zm00001d033873	0.189694	0.0464908	NA
					Zm00001d020569	-0.277815	0.0485612	Transcription factor MYB36		Zm00001d006459	-0.106566	0.0464908	Pre-mRNA-splicing factor ATP-dependent RNA helicase DEAH7
					Zm00001d025253	-0.26161	0.0485612	NA		Zm00001d017377	0.535246	0.0465397	Beta-expansin 3
					Zm00001d039488	-0.30852	0.0485612	Pollen-specific protein SF21		Zm00001d035082	1.00852	0.0465397	Endoglucanase 1
					Zm00001d028025	0.258787	0.0486089	Cp protein [Source:UniProtKB/TrEMBL;Acc:B6T306]		Zm00001d040110	0.320353	0.0465397	NA
					Zm00001d034129	0.247187	0.0486711	Peroxidase 73		Zm00001d033705	-0.207658	0.046626	Myosin-binding protein 3
					ZeamMp157	0.603273	0.0487238	rps2B		Zm00001d038101	-0.233351	0.0466515	NA
					Zm00001d047452	-0.62606	0.0487238	Putative cytochrome P450 superfamily protein		Zm00001d019079	-0.122909	0.0467579	RNA-binding (RRM/RBD/RNP motifs) family protein
					Zm00001d001885	0.897895	0.0487585	Adenylate kinase 1 chloroplastic		Zm00001d016158	0.208404	0.0468463	prefoldin 6
					Zm00001d013993	-0.125792	0.0487585	NA		Zm00001d013683	-0.0635312	0.0469798	DNA-directed RNA polymerase II subunit 2
					Zm00001d027536	0.175019	0.0487585	Serine acetyltransferase 4		Zm00001d034191	0.167369	0.0469798	Electron transporter
					Zm00001d038200	0.0727451	0.0487585	Guanosine nucleotide diphosphate dissociation inhibitor 2		Zm00001d033982	-0.10668	0.0469798	Leucine-rich repeat protein kinase family protein
					Zm00001d052112	0.421077	0.0487585	Growth-regulating factor 6		Zm00001d036531	0.622076	0.0469798	Replication protein A 32 kDa subunit A
					Zm00001d040161	-0.15996	0.0488671	Peroxisomal membrane protein PEX14		Zm00001d012618	0.175317	0.0469798	VPS28-like protein
					Zm00001d013735	0.277992	0.0489913	NA		Zm00001d032265	0.788825	0.0470129	WRKY69-superfamily of TFs having WRKY and zinc finger domains
					Zm00001d012118	0.139358	0.0490394	GPI transamidase component PIG-S-related		Zm00001d025538	-0.157906	0.0470863	NA
					Zm00001d014447	-0.384855	0.0491915	Serine carboxypeptidase-like 19		Zm00001d006010	0.277623	0.0471157	NA
					Zm00001d016599	-0.244698	0.0493758	AT2G33510 (E=5e-065) | protein binding		Zm00001d000738	0.270265	0.0471388	NA
					Zm00001d049821	0.175419	0.0494303	DHBP synthase RibB-like alpha/beta domain		Zm00001d031437	0.267335	0.0471518	pangloss1
					Zm00001d045468	-0.653293	0.0498244	alpha/beta-Hydrolases superfamily protein		Zm00001d024317	0.497237	0.0472132	Transferase
					Zm00001d019507	-0.351742	0.0499278	Cellulose synthase-7		ENSRNA049479540	-0.453647	0.0472409	NA
					Zm00001d008925	-0.29411	0.049933	GDSL esterase/lipase		Zm00001d036621	1.00108	0.0472409	Potassium transporter 1
					Zm00001d031878	-1.15732	0.049933	Early nodulin 75 protein [Source:UniProtKB/TrEMBL;Acc:B4FNV9]		Zm00001d050316	-0.0827327	0.0472409	splicing factor PWI domain-containing protein / RNA recognition motif (RRM)-containing protein
					Zm00001d012892	0.100946	0.0499568	Acyl-CoA-binding domain-containing protein 4		Zm00001d050837	0.467306	0.0473543	Gibberellin receptor GID1L2
					Zm00001d007092	-0.154672	0.0499572	elongation factor Ts family protein		Zm00001d004925	-0.0999774	0.0474033	DDT domain-containing protein PTM
					Zm00001d028045	0.201677	0.0499572	Mannose-1-phosphate guanylyltransferase 1		Zm00001d044339	0.220016	0.0475284	aldehyde dehydrogenase3
										Zm00001d042328	0.185223	0.0475284	F-box protein
										Zm00001d028801	-0.0760983	0.0475327	26S proteasome regulatory subunit 4 homolog A
										Zm00001d053778	0.18898	0.0475327	Cell division control protein 50
										Zm00001d019398	-2.92539	0.0476827	ABC transporter G family member 11
										Zm00001d040038	-0.127695	0.0476827	Actin-interacting protein 1-2
										Zm00001d009795	-0.16224	0.0476827	Cellulose synthase1
										Zm00001d013543	-0.0967228	0.0476827	Glycine-rich RNA-binding protein RZ1C
										Zm00001d032433	0.529064	0.0476827	NA
										Zm00001d002857	-0.141087	0.0476827	OSJNBa0074L08.19 protein; OSJNBa0081C01.7 protein; protein
										Zm00001d052442	0.4469	0.0476827	PIN-formed protein4
										Zm00001d037644	0.403568	0.0476827	Putative membrane lipoprotein
										Zm00001d053834	0.17812	0.0476827	Putative ubiquitin family protein; Ubiquitin2
										Zm00001d006065	0.212878	0.0476827	Transcription factor bHLH62
										Zm00001d031705	0.120817	0.0477265	Haloacid dehalogenase-like hydrolase (HAD) superfamily protein
										Zm00001d051128	0.406753	0.0478255	embryo sac development arrest 6
										Zm00001d039918	0.288144	0.04788	cytochrome P450 family 77 subfamily A polypeptide 5 pseudogene
										Zm00001d018981	0.198889	0.04788	histone1a
										Zm00001d051944	0.535539	0.04788	NA
										Zm00001d006640	-0.166834	0.04788	O-fucosyltransferase family protein
										Zm00001d005270	0.215398	0.04788	Probable tyrosine-protein phosphatase
										Zm00001d052037	-0.835649	0.0478993	NA
										Zm00001d024409	0.164419	0.0478993	Pentatricopeptide repeat-containing protein chloroplastic
										Zm00001d017682	0.324819	0.0478993	PLATZ transcription factor family protein
										Zm00001d036069	0.989588	0.0479032	Zinc finger (C3HC4-type RING finger) family protein
										Zm00001d026387	-0.160143	0.0481057	hAT transposon superfamily protein
										Zm00001d037515	0.383511	0.0481057	NA
										Zm00001d052118	0.641938	0.0481103	Zinc finger protein
										Zm00001d017748	0.329212	0.0482377	3-dehydrosphinganine reductase TSC10B
										Zm00001d048366	0.174974	0.0482377	Expressed protein; protein
										Zm00001d003501	0.345405	0.0484534	NA
										Zm00001d041556	-0.0889379	0.0484764	Importin subunit beta-1
										Zm00001d001088	0.19883	0.0484764	NA
										Zm00001d026253	-0.303044	0.0484834	Calcium-transporting ATPase 9 plasma membrane-type
										Zm00001d023252	0.222957	0.0485359	NA
										Zm00001d014494	0.807529	0.0485862	NA
										Zm00001d034885	-0.100563	0.0488339	ADP-ribosylation factor GTPase-activating protein AGD10
										Zm00001d048227	0.489764	0.0488578	Putative homeobox DNA-binding and leucine zipper domain family protein
										Zm00001d011763	0.326269	0.048945	RING/FYVE/PHD zinc finger superfamily protein
										Zm00001d028707	0.288543	0.0490804	NA
										Zm00001d054076	-0.0912918	0.0493949	Protein transport protein SEC16B homolog
										Zm00001d002725	-0.400365	0.0495805	Putative glucuronosyltransferase PGSIP7
										Zm00001d000229	-1.53204	0.0496182	NA
										Zm00001d042786	0.257201	0.0496493	Beta-16-galactosyltransferase GALT29A
										Zm00001d011697	0.184583	0.0496493	Mitochondrial substrate carrier family protein
										Zm00001d046739	-0.494556	0.0496493	NA
										Zm00001d033557	0.0977181	0.0496493	RNA polymerase II transcription elongation factor
										Zm00001d046194	-0.117427	0.0498784	Probable phospholipid-transporting ATPase 7
										Zm00001d004428	0.130673	0.0499624	NA

## Sheet: Core_DEG
gene_id	LFC SPE	LFC SCE	LFC RBE	description
Zm00001d028748	-2.98851	-11.4933	-11.6559	NA
Zm00001d028835	-2.35339	-3.68089	-4.10842	NA
Zm00001d002917	-2.33857	-2.23062	-5.53232	RNA-binding region RNP-1
Zm00001d028745	-2.21518	-3.89672	-2.22424	Rhodanese-like family protein
Zm00001d028826	-2.19062	-2.70742	-2.88711	COBRA-like protein 7
Zm00001d028808	-1.77731	-1.44531	-1.19574	senescence associated gene 20
Zm00001d028811	-1.44841	-1.42416	-0.801936	Xyloglucan 6-xylosyltransferase 2
Zm00001d028815	-1.41056	-1.07109	-1.42018	Pathogenesis-related protein 10
Zm00001d048123	-1.2241	-2.31917	-4.18416	MFP1 attachment factor 1
Zm00001d028783	-1.00765	-1.22802	-2.45062	Expressed protein; protein
Zm00001d028780	-0.950358	-1.67949	-1.33876	Tetraspanin-18
Zm00001d028726	-0.592027	-0.487743	-0.796204	protein disulfide isomerase9
Zm00001d028834	-0.50517	-0.411593	-0.352575	Peroxisomal biogenesis factor 11 family protein
Zm00001d033320	0.525507	0.289526	0.296094	UDP-glycosyltransferase 91A1
Zm00001d028806	0.535296	0.375807	0.95643	Sex determination protein tasselseed-2
Zm00001d018705	0.777579	0.780704	0.411217	NA
Zm00001d019312	1.11695	0.848228	0.754159	beta glucosidase aggregating factor1
Zm00001d028746	1.25365	1.26173	0.76328	Phosphoinositide phospholipase C 4
Zm00001d010442	1.26888	0.602833	1.29488	Putative wall-associated receptor protein kinase family protein
Zm00001d007448	1.27482	0.973084	0.647097	Pathogenesis-related protein 1
Zm00001d028799	2.19089	4.21133	2.5425	NA
Zm00001d051264	4.63681	5.86672	8.49866	Xyloglucan 6-xylosyltransferase 2
Zm00001d014509	4.82195	4.98971	6.72786	NAD(P)-binding Rossmann-fold superfamily protein
